# Supplementary material for: Theoretical studies on bridged frustrated Lewis pair (FLP) mediated H2 activation and CO2 hydrogenation
Source: Royal Society of Chemistry journal article supplement (doi:10.1039/c8qo00192h), 2018-01-01
Supplement: c8qo00192h1.pdf [file c8qo00192h1.pdf]

## Supporting Information

### Complete Reference 18

Gaussian 09, Frisch, M. J.; Trucks, G. W.; Schlegel, H. B.; Scuseria, G. E.; Robb, M. A.; Cheeseman, J. R.; Scalmani, G.; Barone, V.; Mennucci, B.; Petersson, G. A.; Nakatsuji, H.; Caricato, M.; Li, X.; Hratchian, H. P.; Izmaylov, A. F.; Bloino, J.; Zheng, G.; Sonnenberg, J. L.; Hada, M.; Ehara, M.; Toyota, K.; Fukuda, R.; Hasegawa, J.; Ishida, M.; Nakajima, T.; Honda, Y.; Kitao, O.; Nakai, H.; Vreven, T.; Montgomery, Jr., J. A.; Peralta, J. E.; Ogliaro, F.; Bearpark, M.; Heyd, J. J.; Brothers, E.; Kudin, K. N.; Staroverov, V. N.; Kobayashi, R.; Normand, J.; Raghavachari, K.; Rendell, A.; Burant, J. C.; Iyengar, S. S.; Tomasi, J.; Cossi, M.; Rega, N.; Millam, N. J.; Klene, M.; Knox, J. E.; Cross, J. B.; Bakken, V.; Adamo, C.; Jaramillo, J.; Gomperts, R.; Stratmann, R. E.; Yazyev, O.; Austin, A. J.; Cammi, R.; Pomelli, C.; Ochterski, J. W.; Martin, R. L.; Morokuma, K.; Zakrzewski, V. G.; Voth, G. A.; Salvador, P.; Dannenberg, J. J.; Dapprich, S.; Daniels, A. D.; Farkas, Ö.; Foresman, J. B.; Ortiz, J. V.; Cioslowski, J.; Fox, D. J. Gaussian, Inc., Wallingford CT, 2009.

**Table S1.** The  $\Delta E_{\text{gas}}$ ,  $\Delta G_{\text{gas}}$ , and,  $\Delta E_{\text{sol}}$  of the species involved in  $\text{H}_2$  activation by FLPs A, B, C and D with density functionals B97D, B3LYP, wB97XD and BPW91.

|                  | B97D                    |                         |                         | B3LYP                   |                         |                         | wB97XD                  |                         |                         | BPW91                   |                         |                         |
|------------------|-------------------------|-------------------------|-------------------------|-------------------------|-------------------------|-------------------------|-------------------------|-------------------------|-------------------------|-------------------------|-------------------------|-------------------------|
|                  | $\Delta E_{\text{gas}}$ | $\Delta G_{\text{gas}}$ | $\Delta G_{\text{sol}}$ | $\Delta E_{\text{gas}}$ | $\Delta G_{\text{gas}}$ | $\Delta G_{\text{sol}}$ | $\Delta E_{\text{gas}}$ | $\Delta G_{\text{gas}}$ | $\Delta G_{\text{sol}}$ | $\Delta E_{\text{gas}}$ | $\Delta G_{\text{gas}}$ | $\Delta G_{\text{sol}}$ |
| A + $\text{H}_2$ | 0.0                     | 0.0                     | 0.0                     | 0.0                     | 0.0                     | 0.0                     | 0.0                     | 0.0                     | 0.0                     | 0.0                     | 0.0                     | 0.0                     |
| A1               | -2.0                    | 4.5                     | 6.0                     | 1.9                     | 7.9                     | 12.9                    | -1.0                    | 5.1                     | 5.8                     | -0.4                    | 4.0                     | 5.1                     |
| TS12A            | 21.9                    | 28.7                    | 21.8                    | 13.3                    | 22.6                    | 20.7                    | 22.0                    | 28.6                    | 22.9                    | 10.5                    | 19.8                    | 16.7                    |
| A2               | 4.6                     | 12.7                    | -1.4                    | -3.6                    | 7.4                     | -6.7                    | -1.2                    | 5.2                     | -7.0                    | -4.3                    | 7.3                     | -7.2                    |
| B + $\text{H}_2$ | 0.0                     | 0.0                     | 0.0                     | 0.0                     | 0.0                     | 0.0                     | 0.0                     | 0.0                     | 0.0                     | 0.0                     | 0.0                     | 0.0                     |
| B1               | 4.5                     | 9.2                     | 7.1                     | 1.0                     | 6.4                     | 8.7                     | 4.5                     | 11.0                    | 9.3                     | 0.7                     | 6.3                     | 5.9                     |
| TS12B            | 21.2                    | 28.2                    | 21.3                    | 16.3                    | 26.0                    | 21.6                    | 18.6                    | 27.8                    | 21.6                    | 13.1                    | 23.7                    | 22.4                    |
| B2               | 0.9                     | 10.4                    | -3.9                    | -4.6                    | 7.5                     | -5.2                    | -6.4                    | 3.7                     | -8.0                    | -5.3                    | 8.6                     | -3.1                    |
| C + $\text{H}_2$ | 0.0                     | 0.0                     | 0.0                     | 0.0                     | 0.0                     | 0.0                     | 0.0                     | 0.0                     | 0.0                     | 0.0                     | 0.0                     | 0.0                     |
| C1               | -1.1                    | 5.2                     | 4.4                     | 0.8                     | 6.0                     | 6.4                     | -1.9                    | 7.7                     | 8.0                     | 0.9                     | 6.5                     | 6.9                     |
| TS12C            | 14.1                    | 22.9                    | 17.3                    | 16.1                    | 24.8                    | 20.4                    | 12.3                    | 24.5                    | 19.1                    | 14.3                    | 21.4                    | 17.4                    |
| C2               | -1.0                    | 8.4                     | -4.6                    | -6.2                    | 5.8                     | -5.6                    | -8.5                    | 3.2                     | -6.4                    | -4.8                    | 6.9                     | -2.6                    |
| D + $\text{H}_2$ | 0.0                     | 0.0                     | 0.0                     | 0.0                     | 0.0                     | 0.0                     | 0.0                     | 0.0                     | 0.0                     | 0.0                     | 0.0                     | 0.0                     |
| D1               | -6.8                    | 3.3                     | 5.9                     | 0.9                     | 7.5                     | 7.9                     | -8.7                    | 3.1                     | 4.9                     | 1.8                     | 12.0                    | 14.2                    |
| TS12D            | 16.3                    | 27.4                    | 23.5                    | 17.4                    | 30.5                    | 25.2                    | 15.6                    | 27.5                    | 24.3                    | 15.3                    | 28.0                    | 28.1                    |
| D2               | -1.8                    | 11.7                    | 1.7                     | -1.2                    | 11.1                    | -3.3                    | -7.5                    | 6.0                     | -2.2                    | 1.7                     | 16.3                    | 6.8                     |

**Table S2.** The  $\Delta E_{\text{gas}}$ ,  $\Delta G_{\text{gas}}$ , and,  $\Delta E_{\text{sol}}$  of the species involved in the direct hydrogenation route when system L is used as the catalyst.

| Species      | $\Delta E_{\text{gas}}$ | $\Delta G_{\text{gas}}$ | $\Delta E_{\text{sol}}$ |
|--------------|-------------------------|-------------------------|-------------------------|
| <b>L</b>     | 0.0                     | 0.0                     | 0.0                     |
| <b>L1</b>    | 20.2                    | 12.8                    | 12.8                    |
| <b>TSL12</b> | 42.4                    | 30.2                    | 21.0                    |
| <b>L2</b>    | 17.9                    | 4.0                     | -7.2                    |
| <b>L3</b>    | 23.4                    | 1.2                     | -10.9                   |
| <b>TS34L</b> | 54.2                    | 29.5                    | -2.1                    |
| <b>L4</b>    | 20.7                    | -4.4                    | -20.6                   |
| <b>HCOOH</b> | 18.5                    | 6.0                     | -14.4                   |

**Table S3.** Selected bond distances ( $\text{\AA}$ ) for  $\mathbf{A}_6$  from both experimental and theoretical investigations.

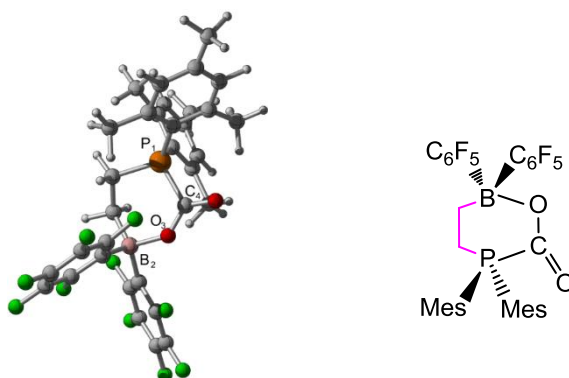

| Ref 8                 | Parameters | $[\mathbf{A}_6]$   |             |
|-----------------------|------------|--------------------|-------------|
|                       |            | X-Ray <sup>a</sup> | Theoretical |
| Bond ( $\text{\AA}$ ) | P1-C4      | 1.900              | 1.953       |
|                       | B2-O3      | 1.550              | 1.564       |
|                       | C4-O3      | 1.300              | 1.282       |

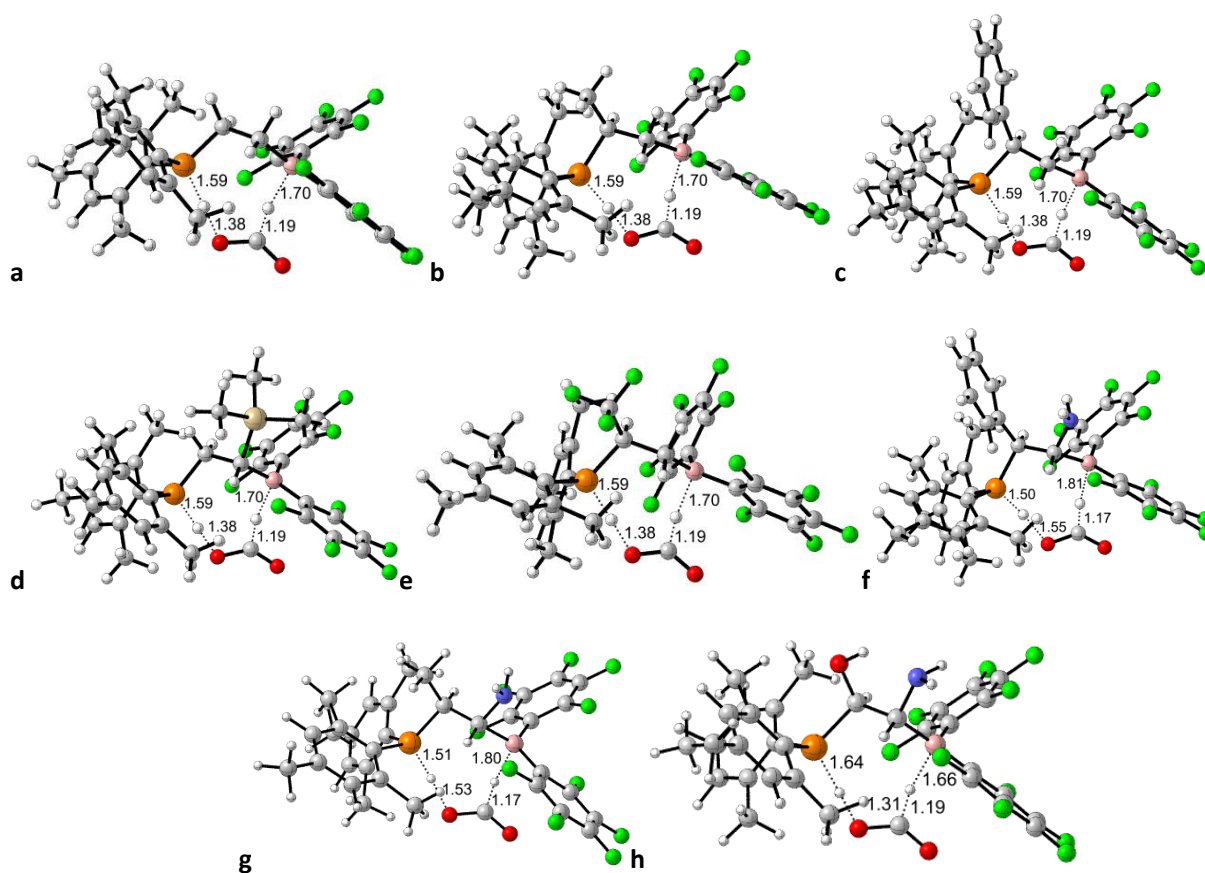

**Figure S1.** Optimized structure of reductive elimination TS (a) TS<sub>34A</sub>; (b) TS<sub>34B</sub>; (c) TS<sub>34C</sub>; (d) TS<sub>34D</sub>; (e) TS<sub>34E</sub>; (f) TS<sub>34L</sub>; (g) TS<sub>34M</sub>; (h) TS<sub>34N</sub>.

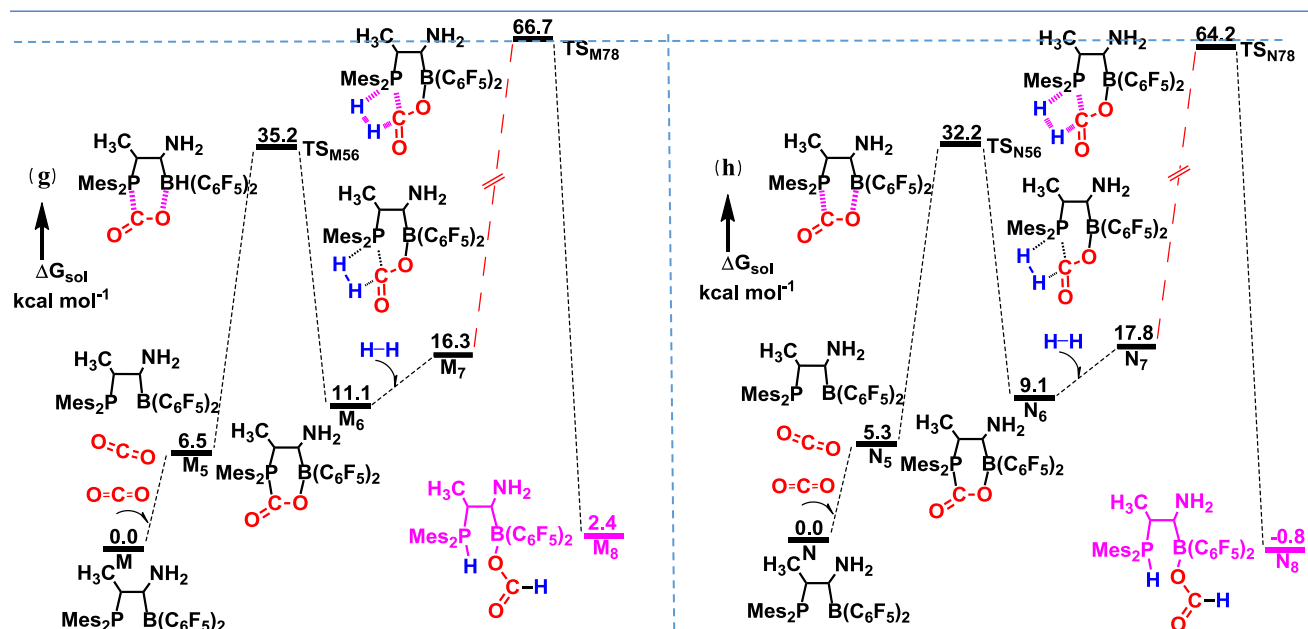

**Figure S2.** Energy profiles calculated for CO<sub>2</sub> reduction through transferring hydrogenation pathway catalyzed by systems **M** and **N**. The calculated solvent-corrected free energies are given in kcal/mol.

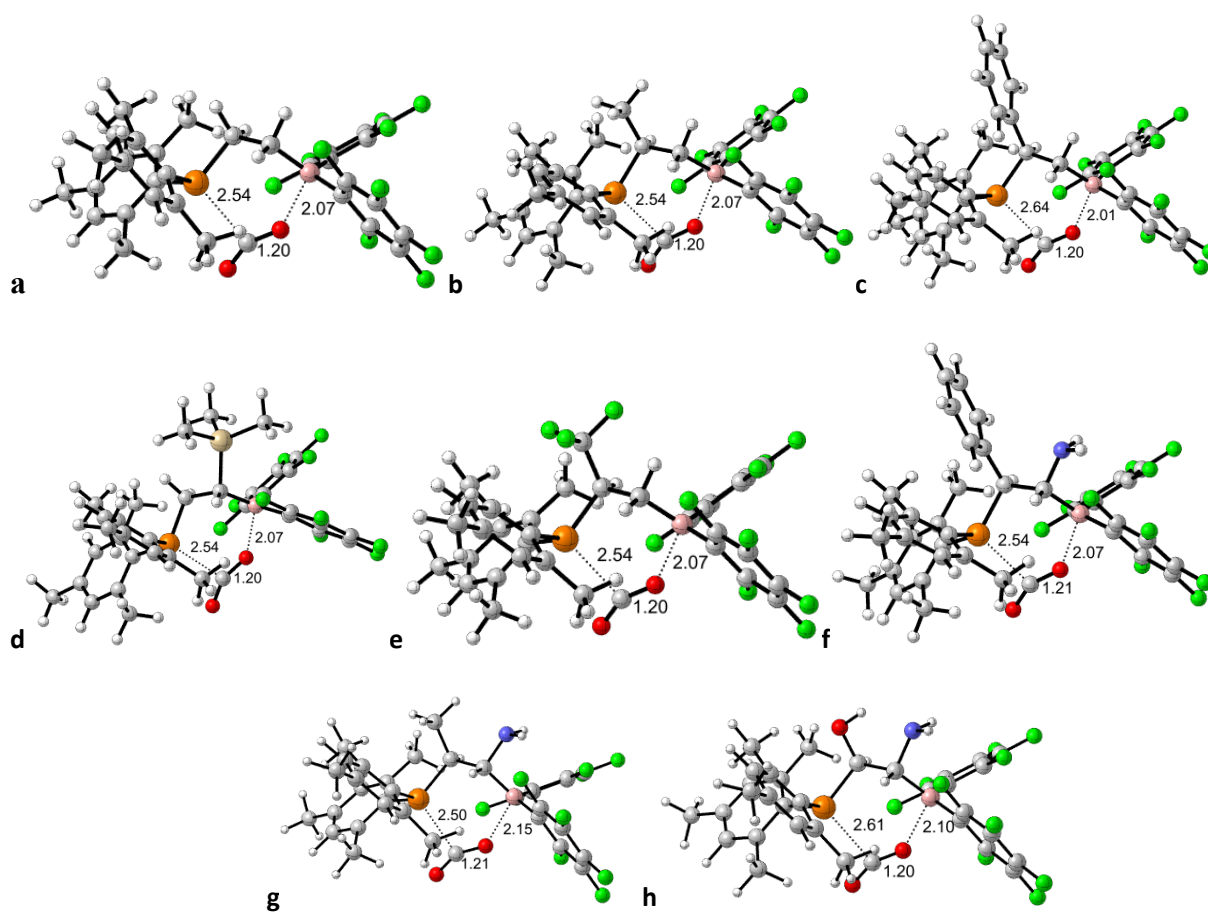

**Figure S3.** Optimized structure of reductive elimination TS (a) TSA34; (b) TSB34; (c) TSC34; (d) TSD34; (e) TSE34; (f) TSL34; (g) TSM34; (h) TSN34.

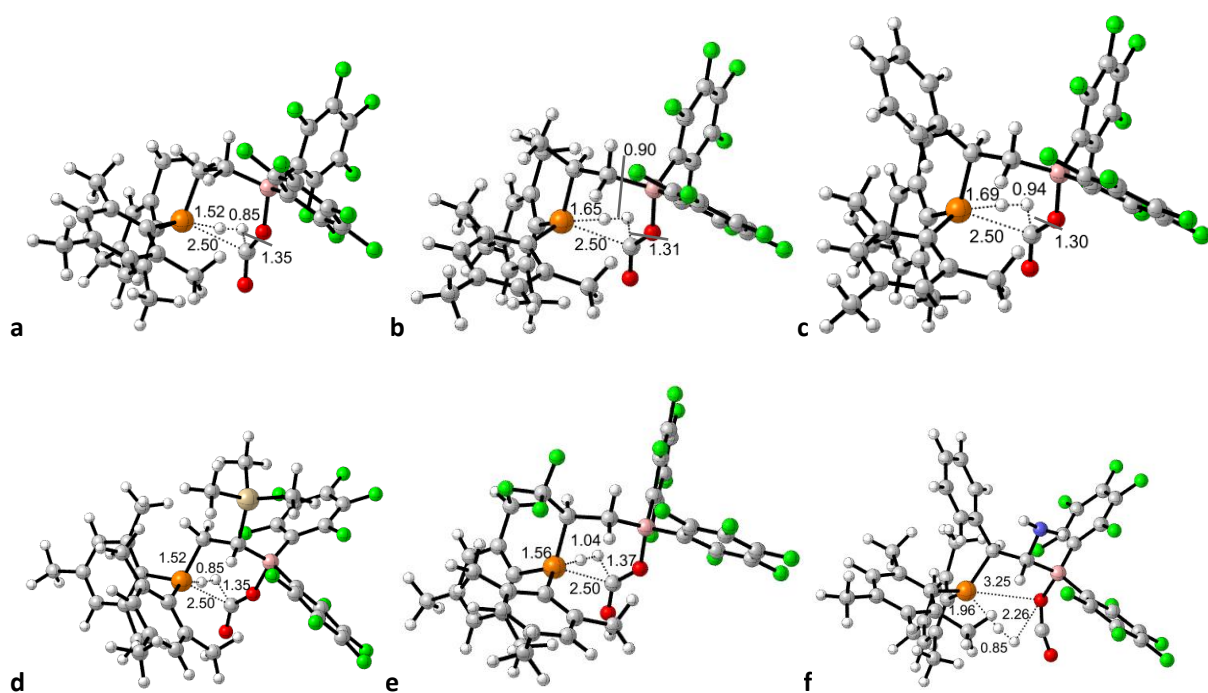

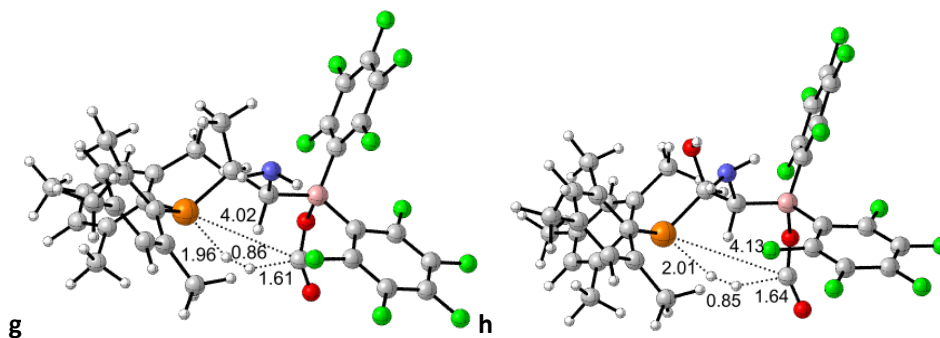

**Figure S4.** Optimized structure of reductive elimination TS (a)  $TS_{A34}$ ; (b)  $TS_{B34}$ ; (c)  $TS_{C34}$ ; (d)  $TS_{D34}$ ; (e)  $TS_{E34}$ ; (f)  $TS_{L34}$ ; (g)  $TS_{M34}$ ; (h)  $TS_{N34}$ .

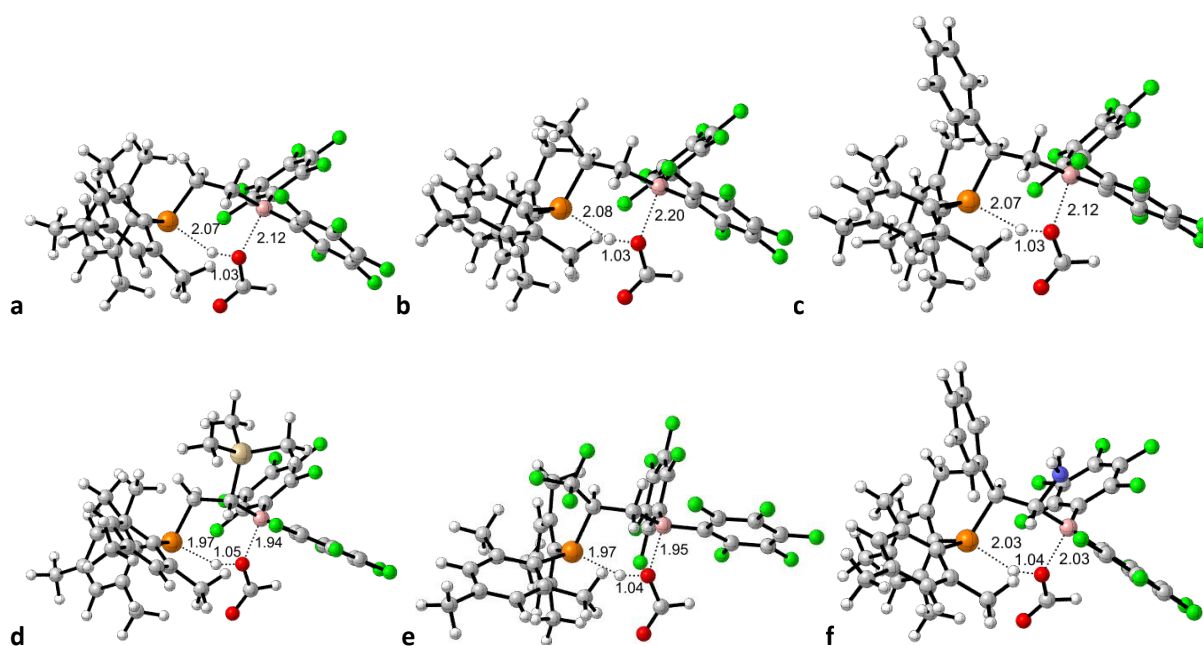

**Figure S4.** Optimized structure of reductive elimination TS (a)  $TS_{34A}$ ; (b)  $TS_{34B}$ ; (c)  $TS_{34C}$ ; (d)  $TS_{34D}$ ; (e)  $TS_{34E}$ ; (f)  $TS_{34L}$ .

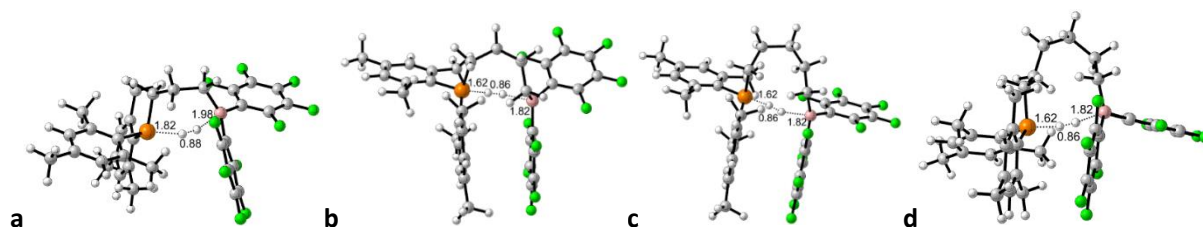

**Figure S5.** Optimized structure of H<sub>2</sub> activation TS (a)  $TS_{F12}$ ; (b)  $TS_{G12}$ ; (c)  $TS_{H12}$ ; (d)  $TS_{I12}$ .

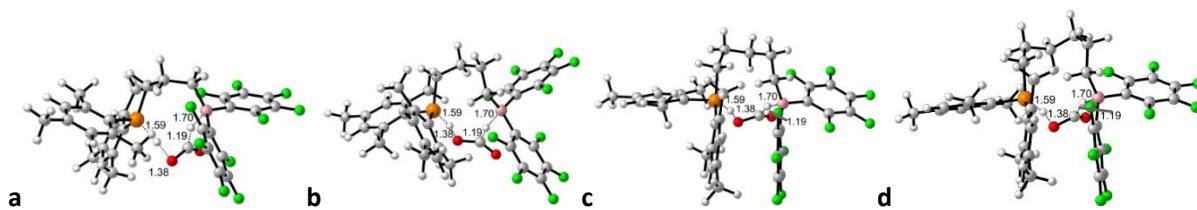

**Figure S6.** Optimized structure of reductive elimination TS (a)  $\text{TS}_{\text{F34}}$ ; (b)  $\text{TS}_{\text{G34}}$ ; (c)  $\text{TS}_{\text{H34}}$ ; (d)  $\text{TS}_{\text{I34}}$ .

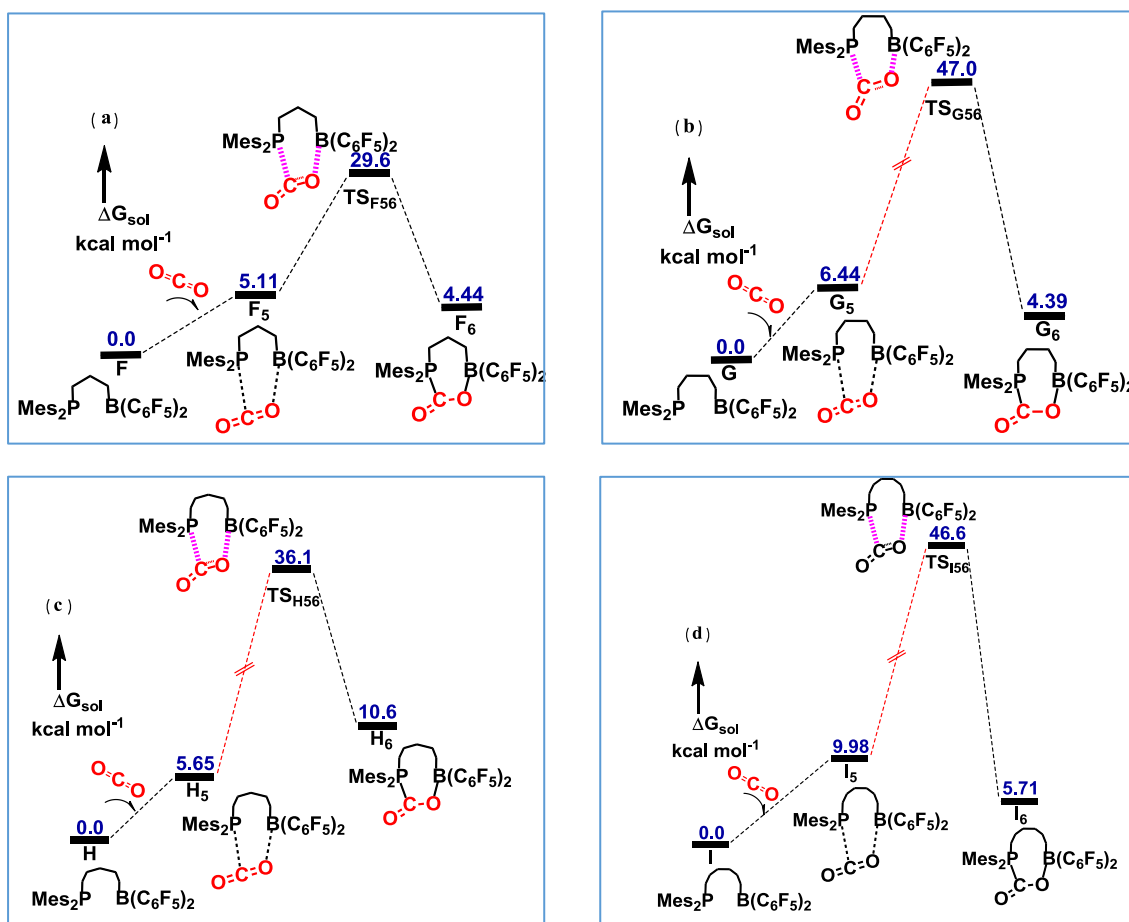

**Figure S7.** Energy profiles calculated for  $\text{CO}_2$  activation catalyzed by elongated alkyl chain-bridged FLPs. The calculated solvent-corrected free energies are given in kcal/mol.

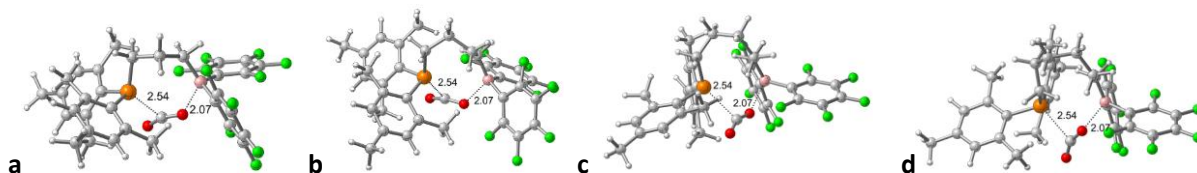

**Figure S8.** Optimized structure of  $\text{CO}_2$  activation TS (a)  $\text{TS}_{\text{F56}}$ ; (b)  $\text{TS}_{\text{G56}}$ ; (c)  $\text{TS}_{\text{H56}}$ ; (d)  $\text{TS}_{\text{I56}}$ .

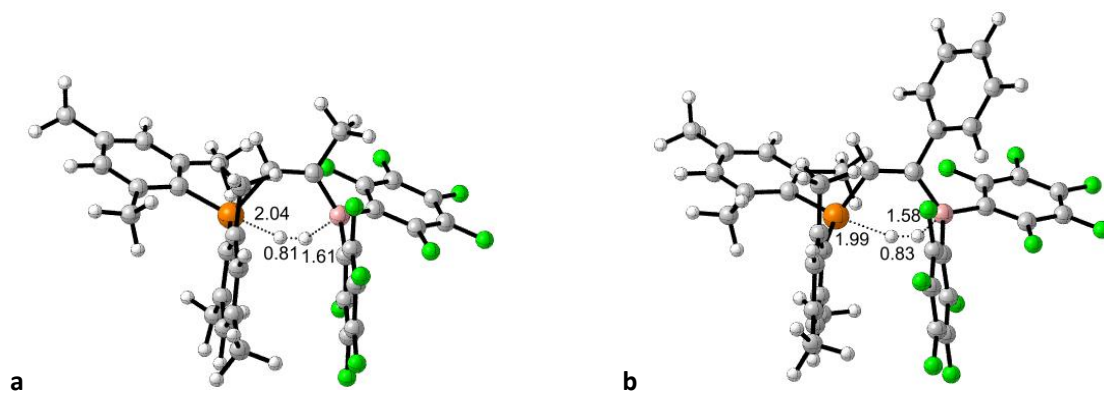

**Figure S9.** Optimized structure of H<sub>2</sub> activation TS (a) TS<sub>J12</sub>; (b) TS<sub>K12</sub>.

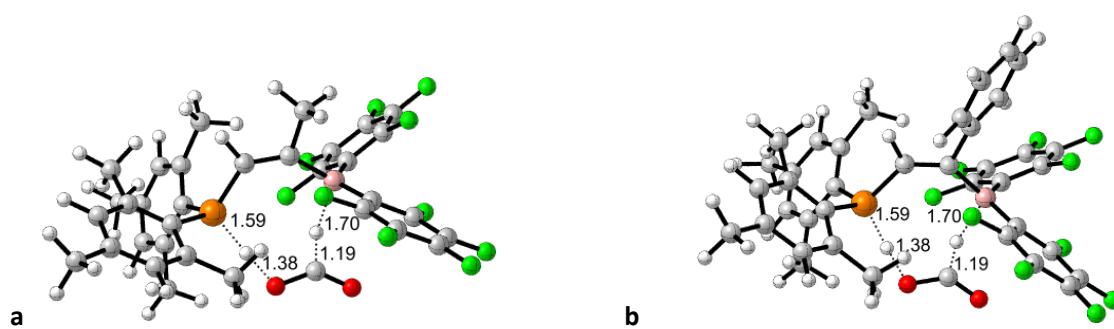

**Figure S10.** Optimized structure of reductive elimination TS (a) TS<sub>J34</sub>; (b) TS<sub>K34</sub>.



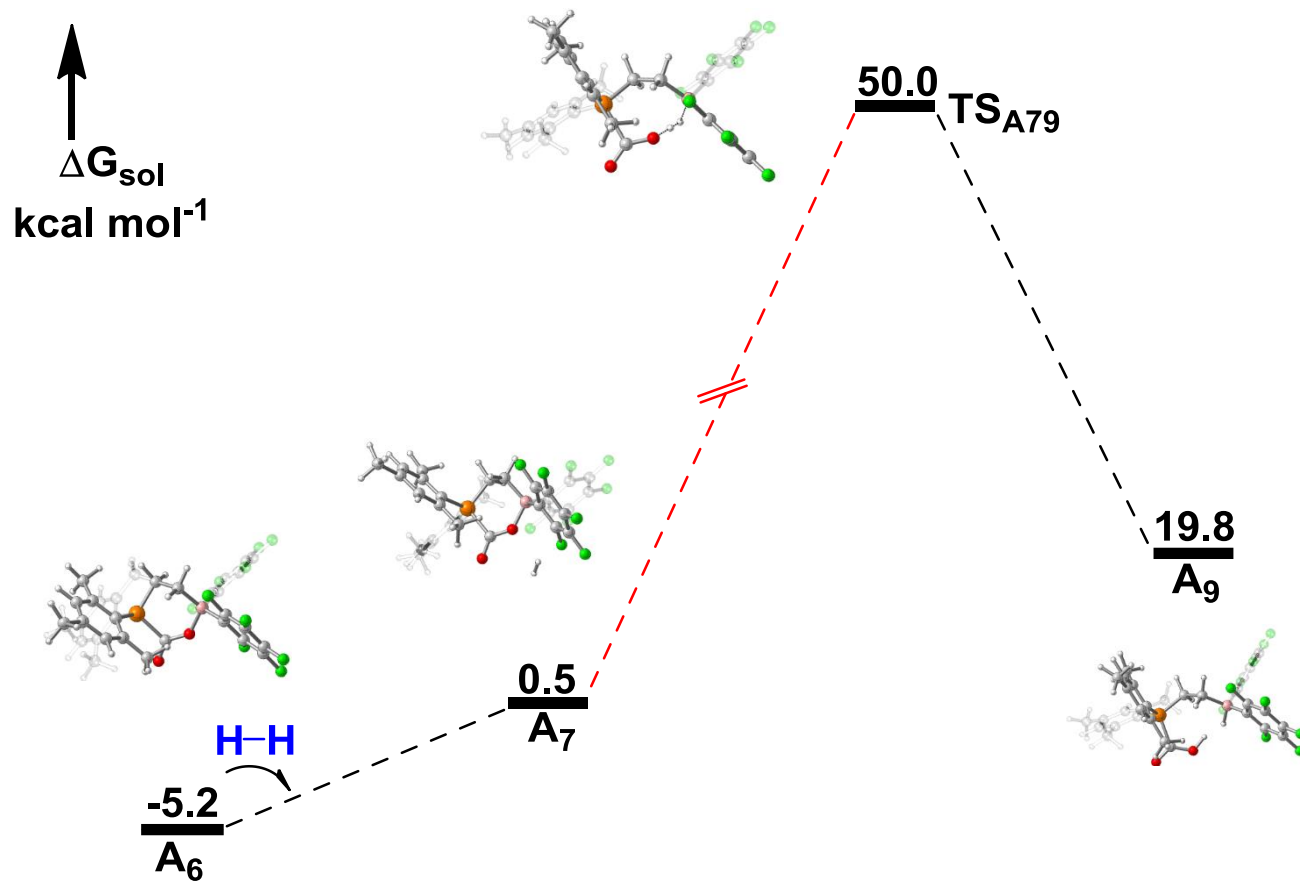

Figure S11. Energy profile for H<sub>2</sub> insertion into B-O bond in system A.

---

## Cartesian coordinates for all the species

calculated in this study:

### A

E= -2264.7253067au

|   |           |           |           |
|---|-----------|-----------|-----------|
| C | 2.231463  | 2.008357  | 0.476606  |
| C | 3.091848  | 2.899547  | -0.217504 |
| C | 3.435070  | 4.122038  | 0.368413  |
| H | 4.097948  | 4.792420  | -0.175942 |
| C | 2.953851  | 4.513145  | 1.620475  |
| C | 2.098838  | 3.637251  | 2.285687  |
| H | 1.704228  | 3.920176  | 3.259252  |
| C | 1.726837  | 2.398144  | 1.744907  |
| C | 3.655015  | 2.610708  | -1.591406 |
| H | 2.861092  | 2.540852  | -2.344337 |
| H | 4.215668  | 1.672736  | -1.620065 |
| H | 4.326317  | 3.415974  | -1.905446 |
| C | 3.350549  | 5.840163  | 2.223248  |
| H | 2.869104  | 5.999621  | 3.193237  |
| H | 3.071205  | 6.675436  | 1.568957  |
| H | 4.435780  | 5.901163  | 2.374188  |
| C | 0.780046  | 1.542910  | 2.566675  |
| H | 1.179691  | 0.540727  | 2.748202  |
| H | -0.189785 | 1.413984  | 2.076838  |
| H | 0.597202  | 2.014556  | 3.537779  |
| C | 3.210216  | -0.558246 | -0.746761 |
| C | 3.573535  | -0.928464 | -2.069134 |
| C | 4.723257  | -1.706020 | -2.276922 |
| H | 4.981182  | -1.978911 | -3.298232 |
| C | 5.548079  | -2.133666 | -1.239732 |
| C | 5.178164  | -1.774242 | 0.056465  |
| H | 5.790043  | -2.103403 | 0.894271  |
| C | 4.034378  | -1.017558 | 0.323452  |
| C | 2.820739  | -0.530797 | -3.323492 |
| H | 3.278547  | -1.004391 | -4.197052 |
| H | 2.849994  | 0.550485  | -3.494233 |
| H | 1.771756  | -0.835955 | -3.306954 |
| C | 6.795379  | -2.943241 | -1.503324 |
| H | 6.883944  | -3.782985 | -0.804101 |
| H | 7.699780  | -2.331357 | -1.386301 |
| H | 6.802305  | -3.348549 | -2.520356 |
| C | 3.723739  | -0.732851 | 1.778163  |

|   |           |           |           |
|---|-----------|-----------|-----------|
| H | 4.451179  | -1.230166 | 2.427095  |
| H | 2.725369  | -1.094681 | 2.052408  |
| H | 3.750616  | 0.338027  | 2.007405  |
| C | -2.823371 | 0.526580  | -0.861079 |
| C | -2.832833 | 1.796316  | -0.292092 |
| F | -1.732591 | 2.257835  | 0.339323  |
| C | -3.946368 | 2.631782  | -0.333534 |
| F | -3.914116 | 3.843593  | 0.231444  |
| C | -5.104540 | 2.193928  | -0.973124 |
| F | -6.179323 | 2.985048  | -1.027000 |
| C | -5.137171 | 0.929804  | -1.558658 |
| F | -6.244213 | 0.504431  | -2.177034 |
| C | -4.002939 | 0.126826  | -1.487173 |
| C | -1.611622 | -1.683253 | 0.133645  |
| C | -1.254068 | -2.989921 | -0.228606 |
| F | -0.919116 | -3.273176 | -1.498551 |
| C | -1.265566 | -4.052669 | 0.669028  |
| F | -0.937840 | -5.287964 | 0.273301  |
| C | -1.627631 | -3.821514 | 1.994258  |
| F | -1.633510 | -4.827296 | 2.869865  |
| C | -1.983880 | -2.538421 | 2.405289  |
| F | -2.321450 | -2.316548 | 3.679565  |
| C | -1.982239 | -1.505161 | 1.474689  |
| F | -2.312197 | -0.281337 | 1.924239  |
| F | -4.047048 | -1.093800 | -2.065308 |
| C | -0.470901 | -0.289191 | -1.970499 |
| H | -0.948531 | -0.001493 | -2.919200 |
| H | 0.071386  | -1.220939 | -2.153624 |
| C | 0.538190  | 0.838750  | -1.589675 |
| H | 1.068208  | 1.181963  | -2.477608 |
| H | 0.008735  | 1.709525  | -1.190318 |
| B | -1.598111 | -0.488830 | -0.884196 |
| P | 1.658486  | 0.329410  | -0.151784 |
| H | -0.746648 | -8.001696 | 2.216903  |
| H | -0.876815 | -7.293393 | 2.036653  |

### A<sub>1</sub>

= -2265.897779au

|   |          |          |           |
|---|----------|----------|-----------|
| C | 2.231463 | 2.008357 | 0.476606  |
| C | 3.091848 | 2.899547 | -0.217504 |
| C | 3.435070 | 4.122038 | 0.368413  |
| H | 4.097948 | 4.792420 | -0.175942 |
| C | 2.953851 | 4.513145 | 1.620475  |

---

|   |           |           |           |
|---|-----------|-----------|-----------|
| C | 2.098838  | 3.637251  | 2.285687  |
| H | 1.704228  | 3.920176  | 3.259252  |
| C | 1.726837  | 2.398144  | 1.744907  |
| C | 3.655015  | 2.610708  | -1.591406 |
| H | 2.861092  | 2.540852  | -2.344337 |
| H | 4.215668  | 1.672736  | -1.620065 |
| H | 4.326317  | 3.415974  | -1.905446 |
| C | 3.350549  | 5.840163  | 2.223248  |
| H | 2.869104  | 5.999621  | 3.193237  |
| H | 3.071205  | 6.675436  | 1.568957  |
| H | 4.435780  | 5.901163  | 2.374188  |
| C | 0.780046  | 1.542910  | 2.566675  |
| H | 1.179691  | 0.540727  | 2.748202  |
| H | -0.189785 | 1.413984  | 2.076838  |
| H | 0.597202  | 2.014556  | 3.537779  |
| C | 3.210216  | -0.558246 | -0.746761 |
| C | 3.573535  | -0.928464 | -2.069134 |
| C | 4.723257  | -1.706020 | -2.276922 |
| H | 4.981182  | -1.978911 | -3.298232 |
| C | 5.548079  | -2.133666 | -1.239732 |
| C | 5.178164  | -1.774242 | 0.056465  |
| H | 5.790043  | -2.103403 | 0.894271  |
| C | 4.034378  | -1.017558 | 0.323452  |
| C | 2.820739  | -0.530797 | -3.323492 |
| H | 3.278547  | -1.004391 | -4.197052 |
| H | 2.849994  | 0.550485  | -3.494233 |
| H | 1.771756  | -0.835955 | -3.306954 |
| C | 6.795379  | -2.943241 | -1.503324 |
| H | 6.883944  | -3.782985 | -0.804101 |
| H | 7.699780  | -2.331357 | -1.386301 |
| H | 6.802305  | -3.348549 | -2.520356 |
| C | 3.723739  | -0.732851 | 1.778163  |
| H | 4.451179  | -1.230166 | 2.427095  |
| H | 2.725369  | -1.094681 | 2.052408  |
| H | 3.750616  | 0.338027  | 2.007405  |
| C | -2.823371 | 0.526580  | -0.861079 |
| C | -2.832833 | 1.796316  | -0.292092 |
| F | -1.732591 | 2.257835  | 0.339323  |
| C | -3.946368 | 2.631782  | -0.333534 |
| F | -3.914116 | 3.843593  | 0.231444  |
| C | -5.104540 | 2.193928  | -0.973124 |
| F | -6.179323 | 2.985048  | -1.027000 |
| C | -5.137171 | 0.929804  | -1.558658 |

|   |           |           |           |
|---|-----------|-----------|-----------|
| F | -6.244213 | 0.504431  | -2.177034 |
| C | -4.002939 | 0.126826  | -1.487173 |
| C | -1.611622 | -1.683253 | 0.133645  |
| C | -1.254068 | -2.989921 | -0.228606 |
| F | -0.919116 | -3.273176 | -1.498551 |
| C | -1.265566 | -4.052669 | 0.669028  |
| F | -0.937840 | -5.287964 | 0.273301  |
| C | -1.627631 | -3.821514 | 1.994258  |
| F | -1.633510 | -4.827296 | 2.869865  |
| C | -1.983880 | -2.538421 | 2.405289  |
| F | -2.321450 | -2.316548 | 3.679565  |
| C | -1.982239 | -1.505161 | 1.474689  |
| F | -2.312197 | -0.281337 | 1.924239  |
| F | -4.047048 | -1.093800 | -2.065308 |
| C | -0.470901 | -0.289191 | -1.970499 |
| H | -0.948531 | -0.001493 | -2.919200 |
| H | 0.071386  | -1.220939 | -2.153624 |
| C | 0.538190  | 0.838750  | -1.589675 |
| H | 1.068208  | 1.181963  | -2.477608 |
| H | 0.008735  | 1.709525  | -1.190318 |
| B | -1.598111 | -0.488830 | -0.884196 |
| P | 1.658486  | 0.329410  | -0.151784 |
| H | -0.746648 | -8.001696 | 2.216903  |
| H | -0.876815 | -7.293393 | 2.036653  |

### TS<sub>12A</sub>

E= -2265.8796583au

|   |          |           |           |
|---|----------|-----------|-----------|
| C | 3.145266 | 1.379973  | 0.276442  |
| C | 4.208689 | 1.725500  | -0.597841 |
| C | 5.064658 | 2.776786  | -0.257411 |
| H | 5.876726 | 3.026969  | -0.937248 |
| C | 4.910602 | 3.513440  | 0.919314  |
| C | 3.862390 | 3.163500  | 1.768523  |
| H | 3.723361 | 3.720052  | 2.692616  |
| C | 2.975833 | 2.117489  | 1.478193  |
| C | 4.464977 | 1.017188  | -1.907808 |
| H | 3.632364 | 1.156227  | -2.607037 |
| H | 4.605924 | -0.058770 | -1.771267 |
| H | 5.362716 | 1.416200  | -2.389252 |
| C | 5.836926 | 4.660489  | 1.245253  |
| H | 5.783290 | 4.930331  | 2.304713  |
| H | 5.576694 | 5.555102  | 0.664146  |
| H | 6.878229 | 4.414418  | 1.008496  |

|   |           |           |           |
|---|-----------|-----------|-----------|
| C | 1.872547  | 1.852677  | 2.484000  |
| H | 1.854558  | 0.812349  | 2.820645  |
| H | 0.884902  | 2.078575  | 2.073395  |
| H | 2.011969  | 2.484879  | 3.366315  |
| C | 2.898264  | -1.576385 | -0.389066 |
| C | 3.029784  | -2.278989 | -1.618482 |
| C | 3.728056  | -3.495556 | -1.635936 |
| H | 3.816574  | -4.022208 | -2.583625 |
| C | 4.313224  | -4.053548 | -0.501422 |
| C | 4.170026  | -3.358096 | 0.699142  |
| H | 4.602189  | -3.771327 | 1.608111  |
| C | 3.473065  | -2.150336 | 0.781798  |
| C | 2.480158  | -1.820898 | -2.954780 |
| H | 2.731803  | -2.552646 | -3.727648 |
| H | 2.904066  | -0.862970 | -3.269499 |
| H | 1.392222  | -1.719072 | -2.951340 |
| C | 5.084510  | -5.349697 | -0.567888 |
| H | 4.892889  | -5.974743 | 0.311436  |
| H | 6.166530  | -5.165108 | -0.602934 |
| H | 4.821793  | -5.927983 | -1.459541 |
| C | 3.357137  | -1.514573 | 2.150147  |
| H | 3.829761  | -2.148921 | 2.905895  |
| H | 2.308779  | -1.375549 | 2.439335  |
| H | 3.840372  | -0.532318 | 2.193070  |
| C | -2.280344 | 1.372116  | -0.477878 |
| C | -1.795982 | 2.618362  | -0.081828 |
| F | -0.554182 | 2.725963  | 0.451254  |
| C | -2.515503 | 3.804533  | -0.203662 |
| F | -1.992217 | 4.967966  | 0.204679  |
| C | -3.788632 | 3.772045  | -0.764413 |
| F | -4.495840 | 4.898371  | -0.898877 |
| C | -4.312910 | 2.556870  | -1.196098 |
| F | -5.529756 | 2.515270  | -1.752995 |
| C | -3.558448 | 1.395548  | -1.047327 |
| C | -2.325734 | -1.262288 | 0.216412  |
| C | -2.674973 | -2.388041 | -0.533692 |
| F | -2.301249 | -2.489246 | -1.824793 |
| C | -3.426340 | -3.443405 | -0.021079 |
| F | -3.733905 | -4.499367 | -0.786161 |
| C | -3.866873 | -3.392582 | 1.298236  |
| F | -4.586311 | -4.397926 | 1.806945  |
| C | -3.553005 | -2.287153 | 2.084560  |
| F | -3.971858 | -2.229312 | 3.355868  |

|   |           |           |           |
|---|-----------|-----------|-----------|
| C | -2.806672 | -1.251998 | 1.529183  |
| F | -2.529089 | -0.201868 | 2.331026  |
| F | -4.110277 | 0.255284  | -1.509027 |
| C | -0.410277 | -0.320020 | -1.550919 |
| H | -0.919230 | -0.141200 | -2.508127 |
| H | -0.142236 | -1.382111 | -1.561157 |
| C | 0.891073  | 0.532949  | -1.522949 |
| H | 1.407249  | 0.512772  | -2.481982 |
| H | 0.666550  | 1.582545  | -1.302950 |
| B | -1.481058 | -0.029839 | -0.379801 |
| P | 1.935750  | -0.002002 | -0.065088 |
| H | 0.100723  | 0.081124  | 0.761085  |
| H | -0.708534 | 0.241012  | 0.874069  |

## A<sub>2</sub>

E=-2265.9065622au

|   |           |           |           |
|---|-----------|-----------|-----------|
| C | -3.570856 | -2.051735 | -0.157473 |
| C | -3.218284 | -0.855762 | 0.514518  |
| C | -3.834028 | -0.534696 | 1.756615  |
| C | -4.806995 | -1.393831 | 2.270109  |
| C | -5.192213 | -2.563685 | 1.611064  |
| C | -4.556461 | -2.869656 | 0.408767  |
| P | -1.942787 | 0.330774  | -0.083993 |
| C | -3.466887 | 0.679803  | 2.581897  |
| C | -6.266158 | -3.457327 | 2.181116  |
| C | -2.920779 | -2.555467 | -1.427014 |
| C | -0.802976 | -0.129571 | -1.464189 |
| C | 0.544017  | 0.618126  | -1.287167 |
| B | 1.469398  | 0.064807  | -0.026543 |
| C | 1.760837  | -1.529661 | -0.319813 |
| C | 0.883667  | -2.524814 | 0.107667  |
| C | 1.024033  | -3.880103 | -0.183334 |
| C | 2.114690  | -4.301672 | -0.934721 |
| C | 3.025693  | -3.352765 | -1.391587 |
| C | 2.824841  | -2.007039 | -1.090127 |
| F | -0.234734 | -2.196277 | 0.822265  |
| F | 3.729789  | -1.143253 | -1.598235 |
| F | 4.074696  | -3.745002 | -2.131779 |
| F | 2.275606  | -5.599676 | -1.232941 |
| F | 0.100275  | -4.770510 | 0.226784  |
| C | 2.830159  | 0.941174  | 0.271240  |
| C | 3.863008  | 0.413106  | 1.057107  |
| C | 5.014693  | 1.107934  | 1.416320  |

|   |           |           |           |
|---|-----------|-----------|-----------|
| C | 5.178793  | 2.424325  | 0.997306  |
| C | 4.178343  | 3.011292  | 0.234240  |
| C | 3.045274  | 2.269681  | -0.101649 |
| F | 3.774169  | -0.850247 | 1.530139  |
| F | 5.963612  | 0.525529  | 2.168188  |
| F | 6.277321  | 3.117092  | 1.334667  |
| F | 4.303404  | 4.289202  | -0.166599 |
| F | 2.113956  | 2.957015  | -0.819264 |
| C | -2.645236 | 1.989830  | -0.440695 |
| C | -3.712004 | 2.116115  | -1.366344 |
| C | -4.202945 | 3.391014  | -1.658532 |
| C | -3.677918 | 4.543421  | -1.069849 |
| C | -2.622079 | 4.394258  | -0.168435 |
| C | -2.084288 | 3.146292  | 0.165484  |
| C | -4.350732 | 0.934645  | -2.064149 |
| C | -4.244419 | 5.906795  | -1.382796 |
| C | -0.924217 | 3.123842  | 1.140564  |
| H | 1.077803  | 0.477399  | -2.238427 |
| H | -0.655981 | -1.208610 | -1.449196 |
| H | -5.271268 | -1.141318 | 3.220536  |
| H | -4.823879 | -3.786529 | -0.110510 |
| H | -2.189790 | 5.280377  | 0.289763  |
| H | -5.017740 | 3.483552  | -2.372738 |
| H | -4.093807 | 0.730791  | 3.475930  |
| H | -2.424707 | 0.635411  | 2.923341  |
| H | -3.597589 | 1.618189  | 2.033666  |
| H | -2.783173 | -1.780361 | -2.184274 |
| H | -1.940445 | -2.991792 | -1.203238 |
| H | -3.532438 | -3.344058 | -1.873585 |
| H | -6.158049 | -3.567671 | 3.265602  |
| H | -7.264085 | -3.038522 | 1.996268  |
| H | -6.238037 | -4.454704 | 1.732259  |
| H | -0.739960 | 4.133099  | 1.518242  |
| H | -1.114411 | 2.484883  | 2.009722  |
| H | 0.003204  | 2.779003  | 0.673399  |
| H | -3.464506 | 6.675167  | -1.374457 |
| H | -4.731435 | 5.923530  | -2.362883 |
| H | -4.996268 | 6.198295  | -0.637468 |
| H | -4.876520 | 0.276913  | -1.364037 |
| H | -5.077461 | 1.280005  | -2.804582 |
| H | -3.617090 | 0.321350  | -2.600274 |
| H | 0.344426  | 1.692109  | -1.237415 |
| H | -1.313401 | 0.131192  | -2.398893 |

|   |           |          |          |
|---|-----------|----------|----------|
| H | -1.076804 | 0.502626 | 1.008102 |
| H | 0.833933  | 0.125944 | 1.021899 |

### A<sub>3</sub>

E= -2454.494348au

|   |           |           |           |
|---|-----------|-----------|-----------|
| C | -3.926538 | -1.681726 | -0.861706 |
| C | -3.464541 | -0.674150 | 0.021956  |
| C | -4.099206 | -0.494659 | 1.283830  |
| C | -5.179121 | -1.313284 | 1.618674  |
| C | -5.657212 | -2.306973 | 0.761325  |
| C | -5.014778 | -2.469160 | -0.465263 |
| P | -2.026290 | 0.425687  | -0.319120 |
| C | 0.441405  | -1.289053 | 3.344842  |
| O | 1.248494  | -2.129574 | 3.373590  |
| C | -3.646086 | 0.524225  | 2.306796  |
| C | -6.837867 | -3.163118 | 1.148795  |
| C | -3.316869 | -2.003802 | -2.209376 |
| C | -0.888356 | -0.023390 | -1.700552 |
| C | 0.499763  | 0.644481  | -1.542388 |
| B | 1.396872  | 0.039709  | -0.295462 |
| O | -0.385786 | -0.457645 | 3.358817  |
| C | 1.692336  | -1.561192 | -0.544308 |
| C | 0.863440  | -2.553595 | -0.021166 |
| C | 1.064536  | -3.921593 | -0.188916 |
| C | 2.154897  | -4.354602 | -0.935763 |
| C | 3.007719  | -3.410906 | -1.501605 |
| C | 2.757532  | -2.053526 | -1.304082 |
| F | -0.248631 | -2.209742 | 0.699389  |
| F | 3.611343  | -1.199014 | -1.906134 |
| F | 4.052364  | -3.819858 | -2.238495 |
| F | 2.373228  | -5.664786 | -1.120462 |
| F | 0.218537  | -4.818612 | 0.347132  |
| C | 2.763706  | 0.892950  | 0.008356  |
| C | 3.306284  | 0.913588  | 1.296823  |
| C | 4.442802  | 1.635984  | 1.654891  |
| C | 5.101476  | 2.389226  | 0.688759  |
| C | 4.610236  | 2.400295  | -0.612390 |
| C | 3.471207  | 1.658480  | -0.921156 |
| F | 2.726301  | 0.202503  | 2.294589  |
| F | 4.905650  | 1.616532  | 2.916868  |
| F | 6.195867  | 3.096706  | 1.008055  |
| F | 5.238954  | 3.123052  | -1.555333 |
| F | 3.064911  | 1.718464  | -2.210473 |

|   |           |           |           |
|---|-----------|-----------|-----------|
| C | -2.490751 | 2.197224  | -0.455146 |
| C | -3.472029 | 2.609143  | -1.392108 |
| C | -3.777947 | 3.968111  | -1.493034 |
| C | -3.147182 | 4.933800  | -0.704951 |
| C | -2.175278 | 4.505260  | 0.200701  |
| C | -1.824645 | 3.158735  | 0.351638  |
| C | -4.201643 | 1.649763  | -2.307047 |
| C | -3.516843 | 6.392659  | -0.817075 |
| C | -0.749564 | 2.821605  | 1.364088  |
| H | 1.001884  | 0.485556  | -2.503818 |
| H | -0.788983 | -1.111604 | -1.686881 |
| H | -5.656150 | -1.170346 | 2.585424  |
| H | -5.364844 | -3.241765 | -1.145230 |
| H | -1.661010 | 5.242451  | 0.812322  |
| H | -4.527719 | 4.279699  | -2.216511 |
| H | -4.341087 | 0.544166  | 3.150572  |
| H | -2.656615 | 0.276828  | 2.709238  |
| H | -3.600492 | 1.538057  | 1.896128  |
| H | -3.124614 | -1.117430 | -2.817714 |
| H | -2.370390 | -2.545509 | -2.102562 |
| H | -3.992485 | -2.648115 | -2.778284 |
| H | -6.746874 | -3.521768 | 2.180064  |
| H | -7.773840 | -2.592960 | 1.086610  |
| H | -6.935187 | -4.033377 | 0.492936  |
| H | -0.361756 | 3.740148  | 1.812462  |
| H | -1.127616 | 2.197650  | 2.182359  |
| H | 0.096227  | 2.287860  | 0.920647  |
| H | -2.664428 | 7.040184  | -0.588285 |
| H | -3.874941 | 6.639482  | -1.821696 |
| H | -4.319174 | 6.647741  | -0.112053 |
| H | -4.791266 | 0.913411  | -1.751415 |
| H | -4.885601 | 2.196347  | -2.961979 |
| H | -3.511918 | 1.098191  | -2.956836 |
| H | 0.371619  | 1.734006  | -1.467400 |
| H | -1.386696 | 0.258130  | -2.634884 |
| H | -1.233289 | 0.332908  | 0.834469  |
| H | 0.743530  | 0.111952  | 0.730282  |

**TS34A**

**E= -2454.4562256au**

|   |          |          |           |
|---|----------|----------|-----------|
| C | 3.611934 | 2.175030 | -0.208362 |
| C | 3.353096 | 0.942453 | 0.441411  |
| C | 4.101653 | 0.597878 | 1.602647  |

|   |           |           |           |
|---|-----------|-----------|-----------|
| C | 5.114203  | 1.455799  | 2.040215  |
| C | 5.408102  | 2.656328  | 1.392475  |
| C | 4.635370  | 2.995386  | 0.282407  |
| P | 2.032646  | -0.282195 | -0.002736 |
| C | -0.797657 | -0.262510 | 2.283124  |
| O | -1.769115 | -0.293395 | 3.004207  |
| C | 3.837586  | -0.647673 | 2.423765  |
| C | 6.526658  | 3.549251  | 1.871885  |
| C | 2.824125  | 2.716907  | -1.381616 |
| C | 0.885430  | 0.184407  | -1.402569 |
| C | -0.425766 | -0.632200 | -1.317872 |
| B | -1.648735 | -0.053030 | -0.449067 |
| O | 0.451692  | -0.377467 | 2.497943  |
| C | -1.900517 | 1.526877  | -0.588199 |
| C | -1.097861 | 2.521491  | -0.029046 |
| C | -1.300625 | 3.883592  | -0.236614 |
| C | -2.357594 | 4.300224  | -1.039323 |
| C | -3.186720 | 3.346777  | -1.625873 |
| C | -2.944977 | 1.996418  | -1.391812 |
| F | -0.040577 | 2.188425  | 0.750671  |
| F | -3.764841 | 1.116366  | -2.000108 |
| F | -4.198009 | 3.735908  | -2.411491 |
| F | -2.565949 | 5.601514  | -1.259082 |
| F | -0.473200 | 4.785249  | 0.309088  |
| C | -2.877841 | -0.974774 | -0.050068 |
| C | -3.931777 | -0.484794 | 0.742844  |
| C | -4.998936 | -1.267873 | 1.172136  |
| C | -5.047325 | -2.612258 | 0.818618  |
| C | -4.028081 | -3.152410 | 0.039991  |
| C | -2.976411 | -2.338746 | -0.367704 |
| F | -3.958138 | 0.799572  | 1.124102  |
| F | -5.975098 | -0.741528 | 1.919548  |
| F | -6.063323 | -3.378784 | 1.219682  |
| F | -4.066254 | -4.445987 | -0.307981 |
| F | -2.028406 | -2.948758 | -1.113442 |
| C | 2.805479  | -1.878427 | -0.553141 |
| C | 3.829068  | -1.892669 | -1.538931 |
| C | 4.362992  | -3.117839 | -1.946906 |
| C | 3.931921  | -4.335555 | -1.415755 |
| C | 2.923109  | -4.301609 | -0.454660 |
| C | 2.344304  | -3.106004 | -0.008504 |
| C | 4.398449  | -0.645717 | -2.181142 |
| C | 4.553701  | -5.639354 | -1.854194 |

|   |           |           |           |
|---|-----------|-----------|-----------|
| C | 1.230081  | -3.226970 | 1.011711  |
| H | -0.844355 | -0.667349 | -2.339330 |
| H | 0.684871  | 1.252030  | -1.365091 |
| H | 5.680289  | 1.176860  | 2.926080  |
| H | 4.825279  | 3.939202  | -0.223584 |
| H | 2.562500  | -5.237079 | -0.033364 |
| H | 5.143010  | -3.117307 | -2.705252 |
| H | 4.542479  | -0.702403 | 3.258191  |
| H | 2.827587  | -0.639326 | 2.850075  |
| H | 3.949313  | -1.567831 | 1.840567  |
| H | 2.689400  | 1.990417  | -2.186704 |
| H | 1.832165  | 3.055053  | -1.060252 |
| H | 3.335895  | 3.583854  | -1.808710 |
| H | 6.606194  | 3.538914  | 2.964161  |
| H | 7.494367  | 3.216779  | 1.473032  |
| H | 6.378570  | 4.585113  | 1.550516  |
| H | 1.257784  | -4.217679 | 1.474768  |
| H | 1.280661  | -2.485313 | 1.810534  |
| H | 0.244111  | -3.126623 | 0.540249  |
| H | 3.880124  | -6.484022 | -1.678620 |
| H | 4.810651  | -5.622353 | -2.918838 |
| H | 5.480701  | -5.838234 | -1.300119 |
| H | 5.019044  | -0.073339 | -1.483889 |
| H | 5.022583  | -0.916381 | -3.037672 |
| H | 3.622406  | 0.032477  | -2.549062 |
| H | -0.202457 | -1.676150 | -1.092940 |
| H | 1.403887  | -0.020478 | -2.344301 |
| H | 1.159730  | -0.396324 | 1.316756  |
| H | -1.020308 | -0.113924 | 1.127485  |

#### A4

E= -2454.4826055au

|   |           |           |           |
|---|-----------|-----------|-----------|
| C | 3.282045  | 2.508094  | -0.173215 |
| C | 3.095954  | 1.211647  | 0.372680  |
| C | 3.870404  | 0.841913  | 1.509636  |
| C | 4.829636  | 1.725181  | 2.016037  |
| C | 5.049020  | 2.986107  | 1.463241  |
| C | 4.251167  | 3.354694  | 0.380767  |
| P | 1.801501  | -0.058801 | -0.112075 |
| C | -0.446337 | 0.528211  | 3.288830  |
| O | -1.086397 | 0.474251  | 4.305736  |
| C | 3.699599  | -0.476590 | 2.236313  |
| C | 6.110644  | 3.910681  | 2.009033  |

|   |           |           |           |
|---|-----------|-----------|-----------|
| C | 2.475484  | 3.083626  | -1.318555 |
| C | 0.868324  | 0.391907  | -1.699290 |
| C | -0.363931 | -0.537332 | -1.833995 |
| B | -1.622201 | -0.173274 | -0.948841 |
| O | -0.183550 | -0.555775 | 2.532814  |
| C | -2.161635 | 1.324303  | -0.980099 |
| C | -1.606488 | 2.404053  | -0.300595 |
| C | -2.114965 | 3.696694  | -0.382407 |
| C | -3.233599 | 3.936779  | -1.178043 |
| C | -3.823238 | 2.885825  | -1.877906 |
| C | -3.281193 | 1.608840  | -1.762041 |
| F | -0.519214 | 2.214561  | 0.484888  |
| F | -3.861070 | 0.608868  | -2.459181 |
| F | -4.891434 | 3.111375  | -2.649383 |
| F | -3.733664 | 5.170466  | -1.274927 |
| F | -1.539493 | 4.701821  | 0.285860  |
| C | -2.450746 | -1.235737 | -0.154634 |
| C | -3.127439 | -0.914073 | 1.035492  |
| C | -3.847355 | -1.845866 | 1.775348  |
| C | -3.929955 | -3.158925 | 1.316174  |
| C | -3.287120 | -3.528002 | 0.135473  |
| C | -2.559696 | -2.574702 | -0.566991 |
| F | -3.067865 | 0.330249  | 1.531397  |
| F | -4.460547 | -1.498478 | 2.907389  |
| F | -4.624515 | -4.062559 | 2.004007  |
| F | -3.379925 | -4.785856 | -0.308943 |
| F | -1.977923 | -2.979948 | -1.708876 |
| C | 2.753743  | -1.559355 | -0.718892 |
| C | 3.836150  | -1.483823 | -1.633735 |
| C | 4.450282  | -2.665570 | -2.066729 |
| C | 4.043551  | -3.925871 | -1.627659 |
| C | 2.980608  | -3.984458 | -0.725771 |
| C | 2.332102  | -2.835075 | -0.258479 |
| C | 4.401392  | -0.184419 | -2.165903 |
| C | 4.744261  | -5.180685 | -2.091711 |
| C | 1.205752  | -3.031710 | 0.736989  |
| H | -0.734325 | -0.440416 | -2.872149 |
| H | 0.549359  | 1.431086  | -1.652386 |
| H | 5.412610  | 1.415293  | 2.880990  |
| H | 4.380000  | 4.343414  | -0.054837 |
| H | 2.641026  | -4.954830 | -0.369743 |
| H | 5.275673  | -2.593252 | -2.772240 |
| H | 4.315214  | -0.491955 | 3.140522  |

|   |           |           |           |
|---|-----------|-----------|-----------|
| H | 2.660123  | -0.638626 | 2.546340  |
| H | 3.990408  | -1.334844 | 1.621346  |
| H | 2.481334  | 2.446934  | -2.207547 |
| H | 1.431591  | 3.246662  | -1.027649 |
| H | 2.882514  | 4.055518  | -1.612271 |
| H | 6.251233  | 3.767661  | 3.085820  |
| H | 7.081157  | 3.728218  | 1.528016  |
| H | 5.854970  | 4.961447  | 1.836166  |
| H | 1.046372  | -4.099165 | 0.918146  |
| H | 1.418041  | -2.562234 | 1.702984  |
| H | 0.256277  | -2.613467 | 0.389747  |
| H | 4.047205  | -6.021392 | -2.176263 |
| H | 5.223210  | -5.035775 | -3.065703 |
| H | 5.528538  | -5.480154 | -1.383569 |
| H | 4.952059  | 0.360234  | -1.392374 |
| H | 5.090937  | -0.382800 | -2.992155 |
| H | 3.628985  | 0.494184  | -2.538119 |
| H | -0.061635 | -1.583042 | -1.738172 |
| H | 1.514548  | 0.281720  | -2.574345 |
| H | 0.371326  | -0.315601 | 1.745709  |
| H | -0.018344 | 1.463109  | 2.884400  |

**B**

E= -2304.0320035au

|   |           |           |           |
|---|-----------|-----------|-----------|
| C | -2.552061 | 1.998583  | 0.674407  |
| C | -2.186491 | 0.959744  | -0.221484 |
| C | -2.195160 | 1.244426  | -1.618843 |
| C | -2.522083 | 2.526515  | -2.070854 |
| C | -2.827572 | 3.568644  | -1.193480 |
| C | -2.855690 | 3.270749  | 0.167948  |
| P | -1.473329 | -0.731535 | 0.166259  |
| C | -1.837384 | 0.207984  | -2.666863 |
| C | -3.079563 | 4.971215  | -1.692252 |
| C | -2.667803 | 1.858710  | 2.180897  |
| C | -0.814201 | -0.766700 | 1.973681  |
| C | 0.691643  | -1.128309 | 1.920573  |
| B | 1.620556  | -0.334265 | 0.918047  |
| C | 1.335108  | 1.174404  | 0.545384  |
| C | 1.406152  | 1.629041  | -0.776329 |
| C | 1.106238  | 2.934571  | -1.147682 |
| C | 0.743712  | 3.854040  | -0.166074 |
| C | 0.686618  | 3.456092  | 1.166379  |
| C | 0.978744  | 2.136723  | 1.492976  |

|   |           |           |           |
|---|-----------|-----------|-----------|
| F | 1.721415  | 0.766902  | -1.761781 |
| F | 0.895061  | 1.798257  | 2.798564  |
| F | 0.319864  | 4.328937  | 2.113230  |
| F | 0.432478  | 5.108165  | -0.505991 |
| F | 1.146054  | 3.311019  | -2.430381 |
| C | 2.966874  | -0.974865 | 0.389360  |
| C | 4.152283  | -0.223714 | 0.319924  |
| C | 5.369633  | -0.749995 | -0.101058 |
| C | 5.434995  | -2.083578 | -0.495947 |
| C | 4.287605  | -2.871334 | -0.454112 |
| C | 3.092477  | -2.314426 | -0.008416 |
| F | 4.163916  | 1.064551  | 0.703746  |
| F | 6.471035  | 0.008353  | -0.128411 |
| F | 6.590090  | -2.604379 | -0.909861 |
| F | 4.344052  | -4.150953 | -0.839587 |
| F | 2.025521  | -3.132470 | -0.009187 |
| C | -2.848732 | -2.010794 | 0.032849  |
| C | -4.246987 | -1.786160 | 0.150350  |
| C | -5.136361 | -2.843888 | -0.085531 |
| C | -4.712716 | -4.127214 | -0.426646 |
| C | -3.338929 | -4.339630 | -0.536071 |
| C | -2.407412 | -3.318999 | -0.319947 |
| C | -4.874002 | -0.462220 | 0.527747  |
| C | -5.699516 | -5.249268 | -0.645742 |
| C | -0.945646 | -3.684626 | -0.458040 |
| H | 1.125068  | -0.932251 | 2.921083  |
| H | -0.885889 | 0.252369  | 2.345398  |
| H | -2.518433 | 2.718395  | -3.141804 |
| H | -3.127293 | 4.054877  | 0.872911  |
| H | -2.973564 | -5.328826 | -0.805322 |
| H | -6.203218 | -2.650333 | 0.006805  |
| H | -2.027019 | 0.604782  | -3.669371 |
| H | -0.778030 | -0.068133 | -2.606866 |
| H | -2.416443 | -0.715442 | -2.559482 |
| H | -2.910566 | 0.845371  | 2.502327  |
| H | -1.744450 | 2.159169  | 2.692739  |
| H | -3.458750 | 2.519278  | 2.551877  |
| H | -3.829104 | 5.488258  | -1.082946 |
| H | -2.156352 | 5.564111  | -1.645988 |
| H | -3.422053 | 4.974896  | -2.732274 |
| H | -0.840298 | -4.676675 | -0.908629 |
| H | -0.392216 | -2.966150 | -1.069016 |
| H | -0.442326 | -3.718873 | 0.515232  |



|   |           |           |           |
|---|-----------|-----------|-----------|
| H | -6.697665 | -4.865134 | -0.880486 |
| H | -5.385922 | -5.904786 | -1.466032 |
| H | -5.792632 | -5.876940 | 0.250809  |
| H | -4.721002 | 0.305170  | -0.236052 |
| H | -5.952677 | -0.585680 | 0.666088  |
| H | -4.467971 | -0.067814 | 1.462829  |
| H | 0.815388  | -2.205715 | 1.772449  |
| C | -1.580625 | -1.686653 | 2.931991  |
| H | -2.631629 | -1.394953 | 3.028595  |
| H | -1.564743 | -2.727877 | 2.591845  |
| H | -1.127280 | -1.656600 | 3.931528  |

### B<sub>1</sub>

E= -2305.2058438au

|   |           |           |           |
|---|-----------|-----------|-----------|
| C | -3.061191 | 0.887621  | -0.033531 |
| C | -4.368684 | 0.570453  | 0.418299  |
| C | -5.417628 | 1.468168  | 0.176186  |
| H | -6.412957 | 1.209565  | 0.532587  |
| C | -5.234469 | 2.673632  | -0.500310 |
| C | -3.946929 | 2.971390  | -0.948448 |
| H | -3.774900 | 3.900341  | -1.488740 |
| C | -2.865752 | 2.110213  | -0.733102 |
| C | -4.722925 | -0.706023 | 1.148672  |
| H | -3.993432 | -0.954479 | 1.921593  |
| H | -4.771975 | -1.563411 | 0.469119  |
| H | -5.700765 | -0.605729 | 1.630795  |
| C | -6.380098 | 3.633143  | -0.720146 |
| H | -6.280418 | 4.164618  | -1.672971 |
| H | -6.417943 | 4.393370  | 0.071763  |
| H | -7.344369 | 3.114131  | -0.719396 |
| C | -1.517143 | 2.545460  | -1.269529 |
| H | -1.628428 | 3.431143  | -1.903345 |
| H | -1.032341 | 1.759607  | -1.856720 |
| H | -0.823049 | 2.808330  | -0.462660 |
| C | -2.133942 | -1.953268 | -0.083178 |
| C | -2.198088 | -3.035464 | 0.829342  |
| C | -2.583962 | -4.304036 | 0.375712  |
| H | -2.629736 | -5.117301 | 1.097431  |
| C | -2.914727 | -4.562891 | -0.952759 |
| C | -2.835024 | -3.496066 | -1.847148 |
| H | -3.074240 | -3.663617 | -2.895542 |
| C | -2.439123 | -2.213987 | -1.452524 |
| C | -1.906769 | -2.922982 | 2.307542  |

|   |           |           |           |
|---|-----------|-----------|-----------|
| H | -1.848990 | -3.918295 | 2.758676  |
| H | -2.696217 | -2.376314 | 2.836016  |
| H | -0.962349 | -2.418333 | 2.512845  |
| C | -3.303500 | -5.947677 | -1.413120 |
| H | -2.437924 | -6.490371 | -1.816552 |
| H | -4.058648 | -5.909782 | -2.206161 |
| H | -3.706742 | -6.545625 | -0.588881 |
| C | -2.353466 | -1.161941 | -2.540312 |
| H | -2.508932 | -1.620683 | -3.521692 |
| H | -1.372937 | -0.671083 | -2.548426 |
| H | -3.104391 | -0.373189 | -2.419819 |
| C | 1.752484  | 1.672318  | 0.448482  |
| C | 2.099979  | 1.915233  | -0.888959 |
| F | 2.246707  | 0.886877  | -1.742271 |
| C | 2.287070  | 3.189447  | -1.411328 |
| F | 2.608003  | 3.363389  | -2.699118 |
| C | 2.140576  | 4.297236  | -0.578622 |
| F | 2.324407  | 5.526579  | -1.060921 |
| C | 1.798947  | 4.112586  | 0.758269  |
| F | 1.663205  | 5.170584  | 1.565554  |
| C | 1.602312  | 2.820153  | 1.239348  |
| C | 2.588091  | -0.911145 | 0.553808  |
| C | 2.212670  | -2.252861 | 0.390014  |
| F | 0.931442  | -2.623174 | 0.551619  |
| C | 3.104733  | -3.257612 | 0.026915  |
| F | 2.689105  | -4.518818 | -0.132708 |
| C | 4.446187  | -2.939059 | -0.168475 |
| F | 5.318048  | -3.889465 | -0.506242 |
| C | 4.874423  | -1.623313 | -0.007863 |
| F | 6.164521  | -1.316810 | -0.183953 |
| C | 3.949242  | -0.643800 | 0.336851  |
| F | 4.429712  | 0.602788  | 0.492412  |
| F | 1.280732  | 2.715664  | 2.543455  |
| B | 1.567617  | 0.204852  | 1.008266  |
| P | -1.535894 | -0.190714 | 0.185729  |
| C | 0.514188  | -0.103255 | 2.150836  |
| H | 0.895301  | 0.414775  | 3.047075  |
| H | 0.511511  | -1.164570 | 2.407506  |
| C | -0.926868 | 0.404268  | 1.902198  |
| H | -0.836117 | 1.460885  | 1.611620  |
| C | -1.806983 | 0.403307  | 3.158772  |
| H | -2.811507 | 0.779010  | 2.940987  |
| H | -1.895242 | -0.584884 | 3.614511  |

---

|   |           |          |           |
|---|-----------|----------|-----------|
| H | -1.362665 | 1.070467 | 3.909624  |
| H | 3.630261  | 1.244675 | -4.002782 |
| H | 4.025728  | 0.969188 | -4.567529 |

### TS<sub>12B</sub>

E= -2305.1814753au

|   |           |           |           |
|---|-----------|-----------|-----------|
| C | -3.432920 | 0.732512  | 0.193765  |
| C | -4.655507 | 0.285675  | 0.758378  |
| C | -5.793174 | 1.096153  | 0.654571  |
| H | -6.723938 | 0.739031  | 1.090433  |
| C | -5.774524 | 2.338541  | 0.020983  |
| C | -4.563563 | 2.767079  | -0.524369 |
| H | -4.519293 | 3.731648  | -1.025767 |
| C | -3.398358 | 1.996437  | -0.454732 |
| C | -4.814923 | -1.031253 | 1.482126  |
| H | -4.028653 | -1.180340 | 2.226533  |
| H | -4.778374 | -1.885451 | 0.798484  |
| H | -5.775737 | -1.061820 | 2.004977  |
| C | -7.011109 | 3.202551  | -0.047277 |
| H | -7.050205 | 3.773140  | -0.981524 |
| H | -7.031111 | 3.928670  | 0.776460  |
| H | -7.924325 | 2.602827  | 0.024484  |
| C | -2.143186 | 2.573773  | -1.069410 |
| H | -2.379298 | 3.474445  | -1.644276 |
| H | -1.639310 | 1.869233  | -1.734941 |
| H | -1.412579 | 2.864328  | -0.304010 |
| C | -2.238583 | -2.052438 | -0.097880 |
| C | -2.139595 | -3.167753 | 0.772914  |
| C | -2.371097 | -4.455006 | 0.268307  |
| H | -2.289716 | -5.297432 | 0.951806  |
| C | -2.708928 | -4.697496 | -1.061762 |
| C | -2.812767 | -3.592590 | -1.906715 |
| H | -3.077709 | -3.746016 | -2.950685 |
| C | -2.573630 | -2.287925 | -1.465583 |
| C | -1.825663 | -3.081282 | 2.248609  |
| H | -1.774380 | -4.084083 | 2.682563  |
| H | -2.596976 | -2.531282 | 2.797260  |
| H | -0.870197 | -2.593086 | 2.450822  |
| C | -2.925818 | -6.100438 | -1.575776 |
| H | -2.007150 | -6.503900 | -2.022282 |
| H | -3.700318 | -6.128164 | -2.349999 |
| H | -3.223421 | -6.781088 | -0.771358 |
| C | -2.695373 | -1.182434 | -2.495918 |

|   |           |           |           |
|---|-----------|-----------|-----------|
| H | -2.916726 | -1.607434 | -3.479364 |
| H | -1.769807 | -0.601139 | -2.585104 |
| H | -3.494840 | -0.473806 | -2.253042 |
| C | 1.639304  | 1.635049  | 0.080511  |
| C | 1.357633  | 2.285215  | -1.123749 |
| F | 0.735913  | 1.629436  | -2.129071 |
| C | 1.670040  | 3.621513  | -1.368307 |
| F | 1.354442  | 4.193218  | -2.538247 |
| C | 2.316649  | 4.363600  | -0.385415 |
| F | 2.626354  | 5.646349  | -0.601191 |
| C | 2.638242  | 3.757141  | 0.825830  |
| F | 3.269347  | 4.457820  | 1.777049  |
| C | 2.301666  | 2.421308  | 1.028973  |
| C | 2.664942  | -0.860450 | 0.156858  |
| C | 3.374245  | -1.494452 | 1.182180  |
| F | 2.968640  | -1.402950 | 2.464297  |
| C | 4.529767  | -2.243973 | 0.962309  |
| F | 5.167145  | -2.828487 | 1.985925  |
| C | 5.024814  | -2.382335 | -0.330110 |
| F | 6.128893  | -3.101114 | -0.557200 |
| C | 4.357531  | -1.767637 | -1.386294 |
| F | 4.820751  | -1.895827 | -2.636768 |
| C | 3.212742  | -1.023293 | -1.120621 |
| F | 2.602186  | -0.451068 | -2.180894 |
| F | 2.662917  | 1.882939  | 2.214073  |
| B | 1.350203  | 0.068872  | 0.399931  |
| P | -1.845680 | -0.253086 | 0.227975  |
| C | 0.489148  | -0.262505 | 1.727127  |
| H | 1.042154  | 0.161605  | 2.572463  |
| H | 0.485131  | -1.343007 | 1.905657  |
| C | -0.953202 | 0.288683  | 1.786595  |
| H | -0.899677 | 1.358860  | 1.527265  |
| C | -1.602484 | 0.227449  | 3.173609  |
| H | -2.623807 | 0.622862  | 3.157363  |
| H | -1.625572 | -0.782582 | 3.586165  |
| H | -1.017833 | 0.846497  | 3.866439  |
| H | -0.065348 | -0.186481 | -0.582153 |
| H | 0.739992  | -0.363474 | -0.794078 |

### B<sub>2</sub>

E= -2305.214788au

|   |           |           |          |
|---|-----------|-----------|----------|
| C | -3.174356 | -2.372456 | 0.125207 |
| C | -2.925275 | -1.097300 | 0.688307 |

|   |           |           |           |
|---|-----------|-----------|-----------|
| C | -3.414237 | -0.791769 | 1.989710  |
| C | -4.171361 | -1.749421 | 2.668022  |
| C | -4.456688 | -3.001414 | 2.119527  |
| C | -3.941365 | -3.287439 | 0.856022  |
| P | -1.940555 | 0.235635  | -0.123348 |
| C | -3.130531 | 0.509010  | 2.711172  |
| C | -5.303723 | -4.003536 | 2.864733  |
| C | -2.621083 | -2.862716 | -1.194000 |
| C | -0.788421 | -0.132572 | -1.564312 |
| C | 0.514546  | 0.675811  | -1.307352 |
| B | 1.456690  | 0.164599  | -0.046232 |
| C | 1.956699  | -1.362658 | -0.406198 |
| C | 1.212046  | -2.482898 | -0.042933 |
| C | 1.538094  | -3.792276 | -0.387852 |
| C | 2.690332  | -4.030946 | -1.128088 |
| C | 3.476843  | -2.950250 | -1.518604 |
| C | 3.092509  | -1.657899 | -1.164482 |
| F | 0.049033  | -2.334933 | 0.657168  |
| F | 3.884327  | -0.658278 | -1.609788 |
| F | 4.585077  | -3.165280 | -2.245439 |
| F | 3.028496  | -5.281291 | -1.477373 |
| F | 0.733508  | -4.814873 | -0.039020 |
| C | 2.701752  | 1.165759  | 0.342112  |
| C | 3.673524  | 0.733546  | 1.254066  |
| C | 4.735866  | 1.513625  | 1.701233  |
| C | 4.866083  | 2.819828  | 1.239078  |
| C | 3.923780  | 3.310394  | 0.345041  |
| C | 2.879952  | 2.485261  | -0.075932 |
| F | 3.605402  | -0.516147 | 1.764747  |
| F | 5.631411  | 1.024262  | 2.575148  |
| F | 5.878227  | 3.594378  | 1.658867  |
| F | 4.020747  | 4.574586  | -0.103900 |
| F | 2.002418  | 3.076247  | -0.934003 |
| C | -2.962936 | 1.732579  | -0.447743 |
| C | -4.195148 | 1.624560  | -1.142575 |
| C | -4.915469 | 2.788198  | -1.425762 |
| C | -4.471309 | 4.053091  | -1.036719 |
| C | -3.267363 | 4.133450  | -0.334908 |
| C | -2.495960 | 3.008162  | -0.022395 |
| C | -4.807804 | 0.307507  | -1.568839 |
| C | -5.281265 | 5.290737  | -1.336604 |
| C | -1.223775 | 3.246126  | 0.768631  |
| H | 1.085368  | 0.592627  | -2.244690 |

|   |           |           |           |
|---|-----------|-----------|-----------|
| H | -0.572361 | -1.199978 | -1.492600 |
| H | -4.540332 | -1.508523 | 3.662092  |
| H | -4.128659 | -4.265108 | 0.418770  |
| H | -2.907239 | 5.108575  | -0.016393 |
| H | -5.853867 | 2.698526  | -1.968085 |
| H | -3.652670 | 0.526608  | 3.671368  |
| H | -2.060166 | 0.624868  | 2.925786  |
| H | -3.453594 | 1.388176  | 2.144629  |
| H | -2.631579 | -2.108933 | -1.983139 |
| H | -1.588107 | -3.202889 | -1.060702 |
| H | -3.202795 | -3.716950 | -1.551473 |
| H | -5.146379 | -3.934123 | 3.946096  |
| H | -6.371870 | -3.828611 | 2.679275  |
| H | -5.080367 | -5.028175 | 2.551658  |
| H | -1.182843 | 4.290471  | 1.089574  |
| H | -1.171673 | 2.631351  | 1.673694  |
| H | -0.314987 | 3.053516  | 0.191143  |
| H | -4.638355 | 6.165856  | -1.475257 |
| H | -5.887247 | 5.163903  | -2.239401 |
| H | -5.968257 | 5.518248  | -0.510724 |
| H | -5.247997 | -0.223526 | -0.717162 |
| H | -5.603705 | 0.481553  | -2.298593 |
| H | -4.087884 | -0.370944 | -2.032789 |
| H | 0.248217  | 1.734932  | -1.250029 |
| H | -1.037263 | 0.615933  | 0.881822  |
| H | 0.793945  | 0.088574  | 0.983701  |
| C | -1.403209 | 0.185890  | -2.936554 |
| H | -2.278005 | -0.422371 | -3.190179 |
| H | -1.685983 | 1.240467  | -3.012327 |
| H | -0.640768 | -0.007525 | -3.698404 |

### **B<sub>3</sub>**

**E= -2493.799371au**

|   |           |           |           |
|---|-----------|-----------|-----------|
| C | 2.797635  | 2.194650  | -0.763993 |
| C | 2.626732  | 1.091596  | 0.108338  |
| C | 2.814717  | 1.257842  | 1.509442  |
| C | 3.113344  | 2.529736  | 1.999361  |
| C | 3.225409  | 3.644043  | 1.165414  |
| C | 3.097895  | 3.443390  | -0.208988 |
| P | 1.978222  | -0.550920 | -0.410448 |
| C | -1.524267 | -1.835370 | 3.584466  |
| O | -2.579889 | -2.333489 | 3.595025  |
| C | 2.677138  | 0.132087  | 2.510685  |

|   |           |           |           |                         |           |           |           |
|---|-----------|-----------|-----------|-------------------------|-----------|-----------|-----------|
| C | 3.438898  | 5.022749  | 1.736115  | H                       | 3.110871  | 0.429603  | 3.469485  |
| C | 2.659095  | 2.148805  | -2.271069 | H                       | 1.622776  | -0.105275 | 2.693526  |
| C | 0.922717  | -0.602035 | -1.972018 | H                       | 3.185608  | -0.783489 | 2.191520  |
| C | -0.495864 | -1.161704 | -1.682474 | H                       | 2.920705  | 1.183161  | -2.705738 |
| B | -1.332210 | -0.515190 | -0.415054 | H                       | 1.634785  | 2.389564  | -2.581632 |
| O | -0.450191 | -1.368064 | 3.602927  | H                       | 3.313378  | 2.898978  | -2.725721 |
| C | -1.239251 | 1.134411  | -0.410988 | H                       | 3.932860  | 5.686754  | 1.019654  |
| C | -0.750805 | 1.879952  | 0.663939  | H                       | 2.469172  | 5.470530  | 1.989614  |
| C | -0.654389 | 3.271493  | 0.663176  | H                       | 4.037518  | 4.993860  | 2.652443  |
| C | -1.084476 | 3.985254  | -0.449782 | H                       | 1.244872  | -4.416529 | 1.133064  |
| C | -1.597084 | 3.294453  | -1.545348 | H                       | 1.204938  | -2.767569 | 1.757717  |
| C | -1.660910 | 1.902937  | -1.499889 | H                       | 0.571891  | -3.115390 | 0.152243  |
| F | -0.303629 | 1.262549  | 1.783234  | H                       | 6.955578  | -4.979091 | 0.002238  |
| F | -2.156817 | 1.289001  | -2.599403 | H                       | 5.699375  | -5.929956 | 0.818609  |
| F | -2.014737 | 3.974468  | -2.626105 | H                       | 5.809269  | -5.933887 | -0.943614 |
| F | -0.996776 | 5.324108  | -0.472827 | H                       | 5.011975  | 0.306883  | -0.762771 |
| F | -0.137181 | 3.931303  | 1.716842  | H                       | 6.111841  | -0.698403 | -1.714588 |
| C | -2.909487 | -0.968165 | -0.333666 | H                       | 4.522182  | -0.290861 | -2.349065 |
| C | -3.629238 | -0.666894 | 0.827805  | H                       | -0.435909 | -2.256027 | -1.585135 |
| C | -4.964728 | -0.996324 | 1.035481  | H                       | 1.048346  | -0.826476 | 0.606174  |
| C | -5.659420 | -1.664956 | 0.031585  | H                       | -0.835344 | -0.909370 | 0.629584  |
| C | -4.997426 | -1.989667 | -1.146375 | C                       | 1.624851  | -1.341574 | -3.121656 |
| C | -3.656217 | -1.636778 | -1.305261 | H                       | 2.580237  | -0.893371 | -3.418827 |
| F | -3.011880 | -0.018165 | 1.847493  | H                       | 1.808029  | -2.390323 | -2.866863 |
| F | -5.587750 | -0.677386 | 2.181596  | H                       | 0.963183  | -1.322682 | -3.994043 |
| F | -6.948535 | -1.995201 | 0.201451  |                         |           |           |           |
| F | -5.654607 | -2.639451 | -2.122301 |                         |           |           |           |
| F | -3.099590 | -2.003262 | -2.484762 |                         |           |           |           |
| C | 3.191930  | -1.931656 | -0.307931 |                         |           |           |           |
| C | 4.517281  | -1.812028 | -0.796867 |                         |           |           |           |
| C | 5.375267  | -2.910213 | -0.686993 |                         |           |           |           |
| C | 4.971359  | -4.121724 | -0.122255 |                         |           |           |           |
| C | 3.662631  | -4.214984 | 0.354816  |                         |           |           |           |
| C | 2.757759  | -3.151276 | 0.279736  |                         |           |           |           |
| C | 5.064732  | -0.554834 | -1.434503 |                         |           |           |           |
| C | 5.910654  | -5.300894 | -0.052130 |                         |           |           |           |
| C | 1.372071  | -3.366901 | 0.854367  |                         |           |           |           |
| H | -1.027894 | -0.988790 | -2.623606 |                         |           |           |           |
| H | 0.801648  | 0.450298  | -2.235327 |                         |           |           |           |
| H | 3.240338  | 2.654272  | 3.071922  |                         |           |           |           |
| H | 3.217421  | 4.290302  | -0.880905 |                         |           |           |           |
| H | 3.328440  | -5.146609 | 0.805067  |                         |           |           |           |
| H | 6.392452  | -2.812125 | -1.058837 |                         |           |           |           |
|   |           |           |           | <b>TS<sub>34B</sub></b> |           |           |           |
|   |           |           |           | <b>E= -2493.76213au</b> |           |           |           |
| C | 3.299737  | 2.303376  | -0.112392 | C                       | 3.299737  | 2.303376  | -0.112392 |
| C | 3.128977  | 1.041667  | 0.511776  | C                       | 3.128977  | 1.041667  | 0.511776  |
| C | 3.820876  | 0.770086  | 1.726283  | C                       | 3.820876  | 0.770086  | 1.726283  |
| C | 4.683153  | 1.740425  | 2.249583  | C                       | 4.683153  | 1.740425  | 2.249583  |
| C | 4.878747  | 2.977812  | 1.639338  | C                       | 4.878747  | 2.977812  | 1.639338  |
| C | 4.170117  | 3.233940  | 0.465191  | C                       | 4.170117  | 3.233940  | 0.465191  |
| P | 1.987258  | -0.323824 | -0.031995 | P                       | 1.987258  | -0.323824 | -0.031995 |
| C | -0.845150 | -0.399288 | 2.308715  | C                       | -0.845150 | -0.399288 | 2.308715  |
| O | -1.780554 | -0.417907 | 3.075504  | O                       | -1.780554 | -0.417907 | 3.075504  |
| C | 3.671027  | -0.514620 | 2.516228  | C                       | 3.671027  | -0.514620 | 2.516228  |
| C | 5.826399  | 4.001334  | 2.216517  | C                       | 5.826399  | 4.001334  | 2.216517  |
| C | 2.577552  | 2.758691  | -1.361558 | C                       | 2.577552  | 2.758691  | -1.361558 |
| C | 0.819279  | 0.000889  | -1.498265 | C                       | 0.819279  | 0.000889  | -1.498265 |
| C | -0.495210 | -0.784771 | -1.241739 | C                       | -0.495210 | -0.784771 | -1.241739 |
| B | -1.704159 | -0.139270 | -0.411033 | B                       | -1.704159 | -0.139270 | -0.411033 |

|   |           |           |           |
|---|-----------|-----------|-----------|
| O | 0.401050  | -0.617713 | 2.448399  |
| C | -1.935529 | 1.437096  | -0.586934 |
| C | -1.105198 | 2.422116  | -0.053028 |
| C | -1.284644 | 3.784781  | -0.274606 |
| C | -2.345905 | 4.211435  | -1.066793 |
| C | -3.203511 | 3.267173  | -1.626597 |
| C | -2.985151 | 1.914968  | -1.378667 |
| F | -0.045649 | 2.072609  | 0.715353  |
| F | -3.832122 | 1.044572  | -1.961980 |
| F | -4.219025 | 3.666485  | -2.401370 |
| F | -2.531082 | 5.513409  | -1.301814 |
| F | -0.428155 | 4.677052  | 0.241672  |
| C | -2.953825 | -1.034689 | -0.009063 |
| C | -3.979861 | -0.525321 | 0.806711  |
| C | -5.066087 | -1.280660 | 1.236848  |
| C | -5.163931 | -2.615462 | 0.856766  |
| C | -4.175251 | -3.172744 | 0.051440  |
| C | -3.101948 | -2.386572 | -0.355060 |
| F | -3.953310 | 0.752516  | 1.211488  |
| F | -6.013806 | -0.738011 | 2.008811  |
| F | -6.199313 | -3.356025 | 1.257518  |
| F | -4.263470 | -4.456010 | -0.324461 |
| F | -2.189664 | -3.007904 | -1.135156 |
| C | 2.990284  | -1.831577 | -0.468401 |
| C | 4.200175  | -1.733187 | -1.210757 |
| C | 4.895296  | -2.901344 | -1.538003 |
| C | 4.456787  | -4.169066 | -1.152457 |
| C | 3.277809  | -4.245318 | -0.413975 |
| C | 2.532080  | -3.113735 | -0.057822 |
| C | 4.833386  | -0.430273 | -1.653659 |
| C | 5.248866  | -5.407450 | -1.495649 |
| C | 1.271565  | -3.375004 | 0.744602  |
| H | -0.957048 | -0.948196 | -2.231847 |
| H | 0.612983  | 1.070859  | -1.489098 |
| H | 5.208631  | 1.516485  | 3.174886  |
| H | 4.290041  | 4.198046  | -0.024289 |
| H | 2.915527  | -5.220229 | -0.095474 |
| H | 5.814708  | -2.812134 | -2.112611 |
| H | 4.314450  | -0.483290 | 3.400117  |
| H | 2.642573  | -0.655179 | 2.866121  |
| H | 3.953304  | -1.399959 | 1.937350  |
| H | 2.551583  | 2.002758  | -2.148867 |
| H | 1.546387  | 3.047071  | -1.130399 |

|   |           |           |           |
|---|-----------|-----------|-----------|
| H | 3.069520  | 3.642187  | -1.778267 |
| H | 5.389313  | 5.005943  | 2.195920  |
| H | 6.086997  | 3.765590  | 3.252946  |
| H | 6.760945  | 4.043960  | 1.641703  |
| H | 1.374250  | -4.318018 | 1.290352  |
| H | 1.042242  | -2.599262 | 1.476543  |
| H | 0.394108  | -3.487074 | 0.094908  |
| H | 4.603333  | -6.288505 | -1.570225 |
| H | 5.781373  | -5.291828 | -2.445539 |
| H | 6.001356  | -5.618351 | -0.724157 |
| H | 5.362589  | 0.057506  | -0.827680 |
| H | 5.561733  | -0.621862 | -2.447424 |
| H | 4.112875  | 0.293538  | -2.037165 |
| H | -0.261605 | -1.795181 | -0.904229 |
| H | 1.090007  | -0.537056 | 1.258563  |
| H | -1.106152 | -0.151332 | 1.178428  |
| C | 1.403460  | -0.384643 | -2.868243 |
| H | 2.321742  | 0.152579  | -3.119660 |
| H | 1.618483  | -1.456287 | -2.920198 |
| H | 0.665857  | -0.152713 | -3.645367 |

#### B<sub>4</sub>

E= -2493.7875877au

|   |           |           |           |
|---|-----------|-----------|-----------|
| C | 2.809352  | 2.699385  | 0.041192  |
| C | 2.764285  | 1.358649  | 0.504526  |
| C | 3.443799  | 1.044304  | 1.718570  |
| C | 4.172804  | 2.035668  | 2.385005  |
| C | 4.244688  | 3.349273  | 1.924475  |
| C | 3.549272  | 3.651219  | 0.754844  |
| P | 1.755778  | -0.070641 | -0.181256 |
| C | -0.466846 | 0.402061  | 3.192080  |
| O | -1.169109 | 0.353948  | 4.167297  |
| C | 3.430611  | -0.331464 | 2.356295  |
| C | 5.010155  | 4.408629  | 2.680630  |
| C | 2.087000  | 3.213370  | -1.185728 |
| C | 0.820919  | 0.298590  | -1.825463 |
| C | -0.403248 | -0.662042 | -1.851724 |
| B | -1.647273 | -0.334392 | -0.933449 |
| O | -0.318254 | -0.639338 | 2.348647  |
| C | -2.232299 | 1.145779  | -0.995547 |
| C | -1.718962 | 2.244128  | -0.315190 |
| C | -2.246809 | 3.525946  | -0.431899 |
| C | -3.347989 | 3.733012  | -1.260496 |

|   |           |           |           |
|---|-----------|-----------|-----------|
| C | -3.898531 | 2.660548  | -1.959605 |
| C | -3.334174 | 1.396279  | -1.812193 |
| F | -0.649644 | 2.083142  | 0.500148  |
| F | -3.873763 | 0.375340  | -2.512017 |
| F | -4.950096 | 2.854208  | -2.762448 |
| F | -3.867757 | 4.955888  | -1.390551 |
| F | -1.702099 | 4.552478  | 0.230412  |
| C | -2.437882 | -1.406108 | -0.113368 |
| C | -3.190693 | -1.061942 | 1.025560  |
| C | -3.879488 | -1.993862 | 1.794009  |
| C | -3.851820 | -3.335745 | 1.421465  |
| C | -3.129029 | -3.731259 | 0.297376  |
| C | -2.439263 | -2.774122 | -0.436312 |
| F | -3.241555 | 0.208468  | 1.447260  |
| F | -4.567137 | -1.618596 | 2.873569  |
| F | -4.514823 | -4.240992 | 2.137566  |
| F | -3.110786 | -5.018520 | -0.065409 |
| F | -1.773802 | -3.220571 | -1.518000 |
| C | 2.989540  | -1.400721 | -0.669190 |
| C | 4.245401  | -1.139263 | -1.285074 |
| C | 5.072099  | -2.211545 | -1.639618 |
| C | 4.723612  | -3.541685 | -1.400612 |
| C | 3.509011  | -3.782244 | -0.761808 |
| C | 2.639346  | -2.749576 | -0.385985 |
| C | 4.801828  | 0.245198  | -1.545200 |
| C | 5.626430  | -4.674632 | -1.826630 |
| C | 1.366286  | -3.172055 | 0.324096  |
| H | -0.836559 | -0.597666 | -2.869635 |
| H | 0.457520  | 1.322667  | -1.732320 |
| H | 4.693935  | 1.765118  | 3.300996  |
| H | 3.578150  | 4.670295  | 0.374453  |
| H | 3.223960  | -4.807780 | -0.536531 |
| H | 6.027193  | -1.993608 | -2.113677 |
| H | 3.913759  | -0.294218 | 3.337101  |
| H | 2.412072  | -0.706778 | 2.508614  |
| H | 3.956932  | -1.078277 | 1.753424  |
| H | 2.251971  | 2.596205  | -2.071521 |
| H | 1.007165  | 3.272904  | -1.011078 |
| H | 2.427616  | 4.224644  | -1.426431 |
| H | 5.405496  | 5.176117  | 2.006479  |
| H | 4.366081  | 4.917547  | 3.410252  |
| H | 5.850472  | 3.977338  | 3.235011  |
| H | 1.491078  | -4.176820 | 0.740309  |

|   |           |           |           |
|---|-----------|-----------|-----------|
| H | 1.092554  | -2.504886 | 1.144236  |
| H | 0.508855  | -3.218527 | -0.356755 |
| H | 6.683530  | -4.406611 | -1.722395 |
| H | 5.443725  | -5.577218 | -1.234373 |
| H | 5.461291  | -4.936141 | -2.880480 |
| H | 5.222422  | 0.680594  | -0.631684 |
| H | 5.604678  | 0.192991  | -2.287497 |
| H | 4.055346  | 0.950267  | -1.909830 |
| H | -0.059396 | -1.693695 | -1.762622 |
| H | 0.285190  | -0.405335 | 1.594188  |
| H | 0.120141  | 1.291789  | 2.902048  |
| C | 1.607563  | 0.161088  | -3.137295 |
| H | 2.454693  | 0.847533  | -3.204357 |
| H | 1.994118  | -0.855036 | -3.262532 |
| H | 0.945972  | 0.374532  | -3.986729 |

### C

E= -2495.7627907au

|   |           |           |           |
|---|-----------|-----------|-----------|
| C | -1.927333 | 2.650876  | 0.362152  |
| C | -1.583914 | 1.651758  | -0.588565 |
| C | -1.319448 | 2.069907  | -1.927500 |
| C | -1.375909 | 3.425181  | -2.265593 |
| C | -1.668772 | 4.415795  | -1.327661 |
| C | -1.959189 | 3.997420  | -0.031176 |
| P | -1.198177 | -0.171514 | -0.309655 |
| C | -0.941155 | 1.103017  | -3.030765 |
| C | -1.631985 | 5.881268  | -1.688319 |
| C | -2.273864 | 2.400661  | 1.816998  |
| C | -0.950176 | -0.546318 | 1.578123  |
| C | 0.458238  | -1.197718 | 1.684978  |
| B | 1.624874  | -0.533003 | 0.840061  |
| C | 1.709635  | 1.037545  | 0.655401  |
| C | 2.046284  | 1.622125  | -0.572522 |
| C | 2.054054  | 2.994043  | -0.787837 |
| C | 1.742067  | 3.850722  | 0.266068  |
| C | 1.431471  | 3.320997  | 1.514028  |
| C | 1.419457  | 1.939702  | 1.682030  |
| F | 2.326583  | 0.836194  | -1.630392 |
| F | 1.089830  | 1.484031  | 2.911068  |
| F | 1.113070  | 4.133761  | 2.529911  |
| F | 1.724646  | 5.172249  | 0.071850  |
| F | 2.340506  | 3.499530  | -1.992774 |
| C | 2.841408  | -1.413289 | 0.333502  |

|   |           |           |           |
|---|-----------|-----------|-----------|
| C | 4.155217  | -0.909831 | 0.294137  |
| C | 5.257889  | -1.661021 | -0.101029 |
| C | 5.078201  | -2.983426 | -0.495956 |
| C | 3.800360  | -3.534990 | -0.479530 |
| C | 2.725065  | -2.757669 | -0.059793 |
| F | 4.418865  | 0.349905  | 0.679647  |
| F | 6.483655  | -1.126241 | -0.101659 |
| F | 6.121000  | -3.716973 | -0.883684 |
| F | 3.617452  | -4.804538 | -0.858871 |
| F | 1.529520  | -3.378010 | -0.075707 |
| C | -2.659637 | -1.133966 | -0.996861 |
| C | -4.030920 | -0.859140 | -0.749500 |
| C | -5.013057 | -1.621283 | -1.391951 |
| C | -4.701820 | -2.657884 | -2.272911 |
| C | -3.353053 | -2.928727 | -2.498402 |
| C | -2.329645 | -2.192098 | -1.888249 |
| C | -4.507382 | 0.211093  | 0.202136  |
| C | -5.788205 | -3.440002 | -2.971984 |
| C | -0.905899 | -2.583938 | -2.233465 |
| H | 0.772006  | -1.153568 | 2.743936  |
| H | -0.885383 | 0.427860  | 2.054274  |
| H | -1.164909 | 3.713045  | -3.293290 |
| H | -2.221113 | 4.743896  | 0.716660  |
| H | -3.081116 | -3.736996 | -3.174023 |
| H | -6.058290 | -1.396616 | -1.188603 |
| H | -0.819621 | 1.638450  | -3.977498 |
| H | 0.004977  | 0.597070  | -2.806308 |
| H | -1.699302 | 0.327429  | -3.182924 |
| H | -2.784277 | 1.452776  | 1.977915  |
| H | -1.383712 | 2.421008  | 2.459646  |
| H | -2.935399 | 3.194603  | 2.179080  |
| H | -0.651346 | 6.311363  | -1.443973 |
| H | -1.802740 | 6.038300  | -2.758428 |
| H | -2.384756 | 6.452622  | -1.134056 |
| H | -0.908702 | -3.458655 | -2.891984 |
| H | -0.374309 | -1.778795 | -2.751676 |
| H | -0.310607 | -2.835364 | -1.353177 |
| H | -6.155295 | -2.902385 | -3.856591 |
| H | -5.425596 | -4.416158 | -3.310528 |
| H | -6.649471 | -3.605145 | -2.315102 |
| H | -4.121339 | 1.198214  | -0.065180 |
| H | -5.600441 | 0.265142  | 0.198932  |
| H | -4.194080 | -0.007328 | 1.228502  |

|   |           |           |          |
|---|-----------|-----------|----------|
| H | 0.384800  | -2.263120 | 1.459776 |
| C | -1.992682 | -1.361405 | 2.317951 |
| C | -2.365385 | -2.648468 | 1.896039 |
| C | -2.558134 | -0.871705 | 3.506900 |
| C | -3.283583 | -3.405799 | 2.622722 |
| H | -1.940340 | -3.063480 | 0.987288 |
| C | -3.477759 | -1.627756 | 4.237339 |
| H | -2.263430 | 0.108011  | 3.874649 |
| C | -3.847741 | -2.898026 | 3.795290 |
| H | -3.558870 | -4.396442 | 2.270317 |
| H | -3.898291 | -1.223638 | 5.154661 |
| H | -4.563099 | -3.489464 | 4.360394 |

### C<sub>1</sub>

E= -2496.9368492au

|   |           |           |           |
|---|-----------|-----------|-----------|
| C | 2.425990  | -1.123214 | -1.221085 |
| C | 3.812735  | -0.826064 | -1.164887 |
| C | 4.703856  | -1.577873 | -1.940598 |
| H | 5.765308  | -1.344789 | -1.882077 |
| C | 4.283351  | -2.615893 | -2.773553 |
| C | 2.918335  | -2.904084 | -2.810734 |
| H | 2.564319  | -3.714305 | -3.444943 |
| C | 1.983329  | -2.181049 | -2.061224 |
| C | 4.402449  | 0.259847  | -0.293446 |
| H | 3.990816  | 0.238063  | 0.718320  |
| H | 4.214304  | 1.258118  | -0.701785 |
| H | 5.486348  | 0.130211  | -0.212662 |
| C | 5.268463  | -3.384906 | -3.621618 |
| H | 4.922766  | -4.406545 | -3.811936 |
| H | 6.251990  | -3.441279 | -3.142785 |
| H | 5.410297  | -2.902261 | -4.598046 |
| C | 0.526880  | -2.583394 | -2.185947 |
| H | -0.118629 | -1.728117 | -2.408817 |
| H | 0.145112  | -3.035848 | -1.263897 |
| H | 0.406314  | -3.322376 | -2.984464 |
| C | 1.556861  | 1.613020  | -0.373251 |
| C | 1.891893  | 2.484434  | 0.690834  |
| C | 2.091841  | 3.847735  | 0.433209  |
| H | 2.357909  | 4.495505  | 1.266198  |
| C | 1.969199  | 4.398660  | -0.840811 |
| C | 1.632129  | 3.532101  | -1.882088 |
| H | 1.525928  | 3.929463  | -2.889471 |
| C | 1.408374  | 2.166536  | -1.680195 |

|   |           |           |           |
|---|-----------|-----------|-----------|
| C | 2.046806  | 2.034638  | 2.122523  |
| H | 2.591325  | 2.785950  | 2.703235  |
| H | 2.587884  | 1.092277  | 2.209125  |
| H | 1.073587  | 1.901121  | 2.609152  |
| C | 2.159344  | 5.877096  | -1.082335 |
| H | 2.786939  | 6.332184  | -0.308939 |
| H | 1.196383  | 6.405315  | -1.074781 |
| H | 2.625021  | 6.068495  | -2.055405 |
| C | 0.998163  | 1.350515  | -2.889940 |
| H | 0.902963  | 1.999412  | -3.765921 |
| H | 0.031051  | 0.859388  | -2.733464 |
| H | 1.723877  | 0.567601  | -3.132905 |
| C | -2.584317 | -1.444889 | 0.523587  |
| C | -2.301346 | -2.821795 | 0.504708  |
| F | -1.080350 | -3.279535 | 0.847598  |
| C | -3.210758 | -3.801869 | 0.122255  |
| F | -2.858659 | -5.092421 | 0.107931  |
| C | -4.501461 | -3.429085 | -0.240167 |
| F | -5.392093 | -4.352094 | -0.601163 |
| C | -4.853055 | -2.083244 | -0.217458 |
| F | -6.095730 | -1.715338 | -0.547492 |
| C | -3.908189 | -1.131590 | 0.156230  |
| C | -1.806643 | 1.172352  | 0.631640  |
| C | -1.731806 | 2.221562  | 1.555030  |
| F | -1.498683 | 1.974270  | 2.862980  |
| C | -1.905370 | 3.560847  | 1.212206  |
| F | -1.824415 | 4.518389  | 2.144082  |
| C | -2.165575 | 3.898916  | -0.110891 |
| F | -2.322075 | 5.177337  | -0.462129 |
| C | -2.260864 | 2.891072  | -1.068804 |
| F | -2.506930 | 3.206404  | -2.347286 |
| C | -2.099177 | 1.568964  | -0.680920 |
| F | -2.198411 | 0.638512  | -1.652137 |
| F | -4.352896 | 0.134901  | 0.177206  |
| C | -0.380197 | -0.713545 | 2.048022  |
| H | -0.696167 | -1.526462 | 2.715722  |
| H | -0.211242 | 0.156566  | 2.683886  |
| C | 0.958212  | -1.144103 | 1.392036  |
| H | 0.754921  | -2.103628 | 0.906496  |
| B | -1.538579 | -0.349331 | 1.001598  |
| P | 1.092481  | -0.200531 | -0.285639 |
| H | -3.527397 | 1.264967  | -3.888839 |
| H | -3.906828 | 1.051948  | -4.490479 |

|   |          |           |          |
|---|----------|-----------|----------|
| C | 2.108099 | -1.429084 | 2.347144 |
| C | 2.148995 | -0.944595 | 3.664004 |
| C | 3.139163 | -2.295063 | 1.939589 |
| C | 3.193365 | -1.283139 | 4.527802 |
| H | 1.355195 | -0.302684 | 4.030685 |
| C | 4.185804 | -2.630131 | 2.797417 |
| H | 3.116625 | -2.713466 | 0.938101 |
| C | 4.220952 | -2.121955 | 4.097826 |
| H | 3.195382 | -0.892865 | 5.542347 |
| H | 4.968710 | -3.300057 | 2.451324 |
| H | 5.031881 | -2.387491 | 4.770660 |

### TS<sub>12c</sub>

E= -2496.9126515au

|   |          |           |           |
|---|----------|-----------|-----------|
| C | 3.080037 | -0.963124 | -0.976596 |
| C | 4.394031 | -0.848129 | -0.452435 |
| C | 5.430896 | -1.571295 | -1.053019 |
| H | 6.433264 | -1.478642 | -0.640151 |
| C | 5.223619 | -2.413166 | -2.147007 |
| C | 3.924000 | -2.523731 | -2.643327 |
| H | 3.734353 | -3.178203 | -3.491330 |
| C | 2.851259 | -1.813079 | -2.093007 |
| C | 4.739813 | -0.002086 | 0.750581  |
| H | 4.140802 | -0.287898 | 1.620726  |
| H | 4.572034 | 1.063425  | 0.569205  |
| H | 5.792209 | -0.136191 | 1.018351  |
| C | 6.370300 | -3.160170 | -2.785225 |
| H | 6.031872 | -4.090036 | -3.254218 |
| H | 7.144085 | -3.409527 | -2.051339 |
| H | 6.847709 | -2.555398 | -3.567887 |
| C | 1.490939 | -1.993995 | -2.738058 |
| H | 1.093307 | -1.046277 | -3.118473 |
| H | 0.742215 | -2.404053 | -2.051929 |
| H | 1.565903 | -2.685817 | -3.582607 |
| C | 2.066760 | 1.734561  | 0.011222  |
| C | 2.203608 | 2.384596  | 1.259697  |
| C | 2.494608 | 3.755585  | 1.292350  |
| H | 2.602471 | 4.236461  | 2.262302  |
| C | 2.655887 | 4.516987  | 0.137112  |
| C | 2.508237 | 3.864771  | -1.089554 |
| H | 2.622042 | 4.433506  | -2.010077 |
| C | 2.203911 | 2.504816  | -1.182313 |
| C | 2.039686 | 1.688763  | 2.586897  |



|   |           |           |           |
|---|-----------|-----------|-----------|
| H | 2.494582  | 2.277974  | 3.389233  |
| H | 2.493114  | 0.697862  | 2.599845  |
| H | 0.980866  | 1.562806  | 2.842382  |
| C | 2.959839  | 5.994543  | 0.200277  |
| H | 3.229186  | 6.305185  | 1.214619  |
| H | 2.091956  | 6.590875  | -0.109949 |
| H | 3.787494  | 6.261326  | -0.467385 |
| C | 2.015189  | 1.927464  | -2.570557 |
| H | 2.197279  | 2.698109  | -3.325687 |
| H | 0.991992  | 1.559154  | -2.709949 |
| H | 2.696955  | 1.095349  | -2.777168 |
| C | -2.822954 | -1.446025 | -0.138871 |
| C | -2.481073 | -2.762453 | -0.465499 |
| F | -1.176286 | -3.096111 | -0.627286 |
| C | -3.405027 | -3.782217 | -0.664294 |
| F | -3.006272 | -5.019169 | -0.988241 |
| C | -4.761406 | -3.501762 | -0.519559 |
| F | -5.671196 | -4.464186 | -0.697487 |
| C | -5.158678 | -2.211326 | -0.186087 |
| F | -6.460094 | -1.933959 | -0.037589 |
| C | -4.197157 | -1.216676 | -0.006320 |
| C | -2.108975 | 1.227221  | -0.108070 |
| C | -2.589577 | 1.971619  | 0.972037  |
| F | -2.739556 | 1.373088  | 2.173158  |
| C | -2.943063 | 3.313895  | 0.888484  |
| F | -3.399541 | 3.973325  | 1.961702  |
| C | -2.822872 | 3.972654  | -0.333021 |
| F | -3.153168 | 5.264575  | -0.437861 |
| C | -2.356045 | 3.275342  | -1.441778 |
| F | -2.235112 | 3.898290  | -2.622198 |
| C | -2.022716 | 1.928052  | -1.312012 |
| F | -1.578699 | 1.313853  | -2.434764 |
| F | -4.665605 | 0.000524  | 0.324655  |
| C | -0.639064 | -0.599553 | 1.326516  |
| H | -1.107129 | -1.329387 | 2.000132  |
| H | -0.541661 | 0.315805  | 1.918050  |
| C | 0.782563  | -1.152188 | 1.009359  |
| H | 0.643237  | -2.013317 | 0.342355  |
| B | -1.688001 | -0.317864 | 0.099251  |
| P | 1.605885  | -0.040379 | -0.318563 |
| H | -0.246818 | -0.316614 | -1.054913 |
| H | -1.030040 | -0.585679 | -1.157586 |
| C | 1.540593  | -1.707576 | 2.207720  |

|   |          |           |          |
|---|----------|-----------|----------|
| C | 1.211561 | -1.387279 | 3.533720 |
| C | 2.555518 | -2.658168 | 1.997298 |
| C | 1.890528 | -1.969388 | 4.606917 |
| H | 0.413305 | -0.682274 | 3.738741 |
| C | 3.237044 | -3.238309 | 3.066355 |
| H | 2.808809 | -2.950553 | 0.982444 |
| C | 2.910103 | -2.893197 | 4.379739 |
| H | 1.612744 | -1.701840 | 5.623152 |
| H | 4.016293 | -3.970607 | 2.871616 |
| H | 3.435503 | -3.348451 | 5.214841 |

## C<sub>2</sub>

E= -2496.9481528au

|   |           |           |           |
|---|-----------|-----------|-----------|
| C | -1.685053 | 2.529012  | -2.074447 |
| C | -1.798296 | 1.129642  | -1.882405 |
| C | -2.058992 | 0.282418  | -2.996615 |
| C | -2.213102 | 0.859014  | -4.259226 |
| C | -2.110054 | 2.234634  | -4.472065 |
| C | -1.851234 | 3.042723  | -3.366118 |
| P | -1.595499 | 0.277454  | -0.255152 |
| C | -2.146647 | -1.225555 | -2.908393 |
| C | -2.249940 | 2.820914  | -5.855357 |
| C | -1.364772 | 3.531254  | -0.988415 |
| C | -0.601616 | 1.115156  | 1.129986  |
| C | 0.619459  | 0.204354  | 1.440541  |
| B | 1.608355  | -0.063802 | 0.117880  |
| C | 3.021438  | 0.772878  | 0.240824  |
| C | 2.993283  | 2.168904  | 0.294200  |
| C | 4.114332  | 2.988807  | 0.365932  |
| C | 5.376452  | 2.404387  | 0.391300  |
| C | 5.473708  | 1.019263  | 0.341365  |
| C | 4.315208  | 0.243048  | 0.268576  |
| F | 1.795966  | 2.825564  | 0.275387  |
| F | 4.525030  | -1.090073 | 0.217309  |
| F | 6.683646  | 0.437595  | 0.364766  |
| F | 6.478376  | 3.165609  | 0.464327  |
| F | 3.990666  | 4.326944  | 0.412031  |
| C | 1.786820  | -1.676799 | -0.123152 |
| C | 1.526707  | -2.311924 | -1.336557 |
| C | 1.597046  | -3.693160 | -1.526397 |
| C | 1.965489  | -4.507962 | -0.462743 |
| C | 2.247975  | -3.926846 | 0.772080  |
| C | 2.154778  | -2.545406 | 0.909123  |

|   |           |           |           |
|---|-----------|-----------|-----------|
| F | 1.143189  | -1.593032 | -2.424523 |
| F | 1.307904  | -4.239256 | -2.721061 |
| F | 2.040335  | -5.837973 | -0.619224 |
| F | 2.604995  | -4.705359 | 1.806628  |
| F | 2.445972  | -2.038307 | 2.127386  |
| C | -3.183698 | -0.468044 | 0.312868  |
| C | -4.361018 | 0.310926  | 0.430736  |
| C | -5.544651 | -0.312819 | 0.834206  |
| C | -5.604816 | -1.674864 | 1.135215  |
| C | -4.425606 | -2.416976 | 1.041278  |
| C | -3.210940 | -1.851593 | 0.638978  |
| C | -4.392731 | 1.798678  | 0.170771  |
| C | -6.904640 | -2.327989 | 1.537129  |
| C | -2.000912 | -2.764495 | 0.592100  |
| H | 1.155913  | 0.726337  | 2.243680  |
| H | -0.201310 | 2.008308  | 0.659750  |
| H | -2.416047 | 0.204681  | -5.103649 |
| H | -1.768521 | 4.117922  | -3.505155 |
| H | -4.445316 | -3.474399 | 1.293919  |
| H | -6.444566 | 0.290973  | 0.924133  |
| H | -2.499673 | -1.635929 | -3.858263 |
| H | -1.158434 | -1.659305 | -2.716291 |
| H | -2.836313 | -1.565968 | -2.129894 |
| H | -1.903029 | 3.344068  | -0.057195 |
| H | -0.291446 | 3.537543  | -0.766820 |
| H | -1.632676 | 4.538328  | -1.320769 |
| H | -1.303865 | 2.744683  | -6.407028 |
| H | -3.009400 | 2.291245  | -6.440409 |
| H | -2.522921 | 3.880121  | -5.816968 |
| H | -2.256784 | -3.742082 | 1.009052  |
| H | -1.645499 | -2.935702 | -0.431039 |
| H | -1.152602 | -2.379319 | 1.166716  |
| H | -6.735820 | -3.183034 | 2.199697  |
| H | -7.566796 | -1.622275 | 2.049079  |
| H | -7.443349 | -2.700244 | 0.655612  |
| H | -4.125677 | 2.044513  | -0.861765 |
| H | -5.393349 | 2.197000  | 0.359883  |
| H | -3.701683 | 2.329253  | 0.835854  |
| H | 0.268897  | -0.727254 | 1.903858  |
| H | -0.832004 | -0.846445 | -0.588914 |
| H | 1.047002  | 0.394643  | -0.870454 |
| C | -1.420765 | 1.526287  | 2.341032  |
| C | -2.033182 | 0.587510  | 3.186387  |

|   |           |           |          |
|---|-----------|-----------|----------|
| C | -1.489314 | 2.882802  | 2.697730 |
| C | -2.714820 | 0.994328  | 4.332814 |
| H | -1.968286 | -0.471312 | 2.957102 |
| C | -2.167792 | 3.292214  | 3.847806 |
| H | -0.980359 | 3.623045  | 2.086008 |
| C | -2.789978 | 2.348943  | 4.665671 |
| H | -3.181172 | 0.249554  | 4.972121 |
| H | -2.200126 | 4.347208  | 4.106360 |
| H | -3.317550 | 2.663659  | 5.561866 |

### C<sub>3</sub>

E= -2685.5331359au

|   |           |           |           |
|---|-----------|-----------|-----------|
| C | -2.614260 | 2.392538  | 0.663351  |
| C | -2.257519 | 1.497763  | -0.375416 |
| C | -2.213444 | 1.957435  | -1.722656 |
| C | -2.536413 | 3.289458  | -1.989014 |
| C | -2.888847 | 4.190446  | -0.981515 |
| C | -2.927200 | 3.715714  | 0.328797  |
| P | -1.745225 | -0.257402 | -0.119153 |
| C | 2.396085  | -0.612704 | -3.869037 |
| O | 3.529648  | -0.391587 | -3.702326 |
| C | -1.797626 | 1.091785  | -2.892960 |
| C | -3.186338 | 5.634956  | -1.299246 |
| C | -2.650173 | 2.046182  | 2.135869  |
| C | -0.888569 | -0.671180 | 1.519085  |
| C | 0.548916  | -1.203533 | 1.225736  |
| B | 1.505104  | -0.384035 | 0.153667  |
| O | 1.263804  | -0.828291 | -4.080647 |
| C | 1.482406  | 1.258309  | 0.304588  |
| C | 1.599956  | 2.075418  | -0.825456 |
| C | 1.553052  | 3.467802  | -0.798839 |
| C | 1.378307  | 4.119896  | 0.417148  |
| C | 1.252970  | 3.361372  | 1.575542  |
| C | 1.318006  | 1.971961  | 1.493977  |
| F | 1.734964  | 1.527733  | -2.060211 |
| F | 1.151704  | 1.316600  | 2.671556  |
| F | 1.047184  | 3.971006  | 2.756272  |
| F | 1.311748  | 5.458416  | 0.468907  |
| F | 1.657214  | 4.183957  | -1.930615 |
| C | 3.015895  | -1.013005 | 0.218087  |
| C | 3.964018  | -0.675846 | 1.186207  |
| C | 5.243077  | -1.226046 | 1.244108  |
| C | 5.618067  | -2.178685 | 0.301547  |

|   |           |           |           |
|---|-----------|-----------|-----------|
| C | 4.707665  | -2.561506 | -0.678154 |
| C | 3.441359  | -1.981010 | -0.693649 |
| F | 3.658194  | 0.228052  | 2.144631  |
| F | 6.111998  | -0.856059 | 2.199317  |
| F | 6.841623  | -2.726559 | 0.340936  |
| F | 5.055609  | -3.486603 | -1.588422 |
| F | 2.604742  | -2.419138 | -1.671461 |
| C | -2.984398 | -1.474632 | -0.721912 |
| C | -4.339349 | -1.422265 | -0.310612 |
| C | -5.240157 | -2.346688 | -0.843951 |
| C | -4.847324 | -3.328042 | -1.757185 |
| C | -3.500216 | -3.382103 | -2.120260 |
| C | -2.549222 | -2.481241 | -1.627450 |
| C | -4.850612 | -0.434449 | 0.710698  |
| C | -5.850938 | -4.292313 | -2.340677 |
| C | -1.116204 | -2.653564 | -2.091497 |
| H | 1.015007  | -1.236087 | 2.219129  |
| H | -0.768701 | 0.303955  | 1.988486  |
| H | -2.501610 | 3.633334  | -3.019867 |
| H | -3.201979 | 4.397092  | 1.130542  |
| H | -3.169522 | -4.154332 | -2.810559 |
| H | -6.278967 | -2.302591 | -0.525308 |
| H | -2.007948 | 1.608599  | -3.833172 |
| H | -0.720092 | 0.885521  | -2.873560 |
| H | -2.327713 | 0.134291  | -2.922055 |
| H | -2.958856 | 1.020175  | 2.338721  |
| H | -1.665903 | 2.199103  | 2.597619  |
| H | -3.350298 | 2.706560  | 2.656575  |
| H | -2.257847 | 6.219105  | -1.342574 |
| H | -3.681339 | 5.738574  | -2.270530 |
| H | -3.825249 | 6.091135  | -0.536546 |
| H | -1.019214 | -3.588033 | -2.650822 |
| H | -0.788184 | -1.848205 | -2.758455 |
| H | -0.394760 | -2.692463 | -1.269487 |
| H | -5.379837 | -5.238079 | -2.626674 |
| H | -6.656333 | -4.510163 | -1.631618 |
| H | -6.315901 | -3.872839 | -3.242736 |
| H | -4.692241 | 0.602959  | 0.400182  |
| H | -5.923217 | -0.572593 | 0.872544  |
| H | -4.354518 | -0.579484 | 1.677434  |
| H | 0.480047  | -2.251834 | 0.901765  |
| H | -0.683989 | -0.390632 | -1.028114 |
| H | 1.107511  | -0.607928 | -0.974371 |

|   |           |           |          |
|---|-----------|-----------|----------|
| C | -1.686212 | -1.559986 | 2.458475 |
| C | -2.048287 | -2.872726 | 2.115802 |
| C | -1.990884 | -1.104771 | 3.751169 |
| C | -2.716823 | -3.690990 | 3.025826 |
| H | -1.797898 | -3.265549 | 1.135545 |
| C | -2.655158 | -1.924906 | 4.665900 |
| H | -1.680698 | -0.108297 | 4.054250 |
| C | -3.027604 | -3.219363 | 4.303404 |
| H | -2.988049 | -4.703091 | 2.737708 |
| H | -2.873055 | -1.551450 | 5.662851 |
| H | -3.544249 | -3.860065 | 5.012665 |

### TS<sub>34C</sub>

E= -2685.4906024au

|   |           |           |           |
|---|-----------|-----------|-----------|
| C | -3.068068 | 2.464898  | -0.515270 |
| C | -2.881060 | 1.192420  | -1.104377 |
| C | -3.462702 | 0.928704  | -2.380833 |
| C | -4.227819 | 1.923621  | -2.995388 |
| C | -4.431702 | 3.179987  | -2.422730 |
| C | -3.837668 | 3.423609  | -1.187492 |
| P | -1.828250 | -0.199203 | -0.441590 |
| C | 1.156351  | -0.301133 | -2.600387 |
| O | 2.133013  | -0.330686 | -3.313138 |
| C | -3.295517 | -0.370554 | -3.142554 |
| C | -5.269304 | 4.225700  | -3.117977 |
| C | -2.472705 | 2.893390  | 0.803863  |
| C | -0.733818 | 0.092141  | 1.108434  |
| C | 0.548410  | -0.772050 | 0.903168  |
| B | 1.835859  | -0.160339 | 0.172482  |
| O | -0.084312 | -0.492855 | -2.810701 |
| C | 2.137647  | 1.394229  | 0.422717  |
| C | 1.392080  | 2.441937  | -0.117535 |
| C | 1.626995  | 3.784011  | 0.168234  |
| C | 2.662444  | 4.123589  | 1.033357  |
| C | 3.437017  | 3.114687  | 1.601555  |
| C | 3.163643  | 1.785973  | 1.289613  |
| F | 0.360301  | 2.178808  | -0.955866 |
| F | 3.929746  | 0.851444  | 1.884180  |
| F | 4.426602  | 3.430458  | 2.445172  |
| F | 2.901182  | 5.404128  | 1.329523  |
| F | 0.848364  | 4.738642  | -0.359264 |
| C | 3.060532  | -1.110241 | -0.182721 |
| C | 4.165709  | -0.630643 | -0.908148 |

|   |           |           |           |
|---|-----------|-----------|-----------|
| C | 5.237007  | -1.429531 | -1.294725 |
| C | 5.237436  | -2.780561 | -0.962165 |
| C | 4.166977  | -3.310107 | -0.248013 |
| C | 3.111642  | -2.480272 | 0.116761  |
| F | 4.234553  | 0.659885  | -1.265053 |
| F | 6.262309  | -0.913223 | -1.980794 |
| F | 6.257013  | -3.562935 | -1.321949 |
| F | 4.159416  | -4.609115 | 0.080987  |
| F | 2.114641  | -3.078904 | 0.805676  |
| C | -2.921483 | -1.668710 | -0.132928 |
| C | -4.155068 | -1.526841 | 0.558989  |
| C | -4.960155 | -2.653198 | 0.751184  |
| C | -4.598889 | -3.919460 | 0.288270  |
| C | -3.381091 | -4.040656 | -0.380384 |
| C | -2.530433 | -2.950820 | -0.607309 |
| C | -4.666389 | -0.215381 | 1.113000  |
| C | -5.506333 | -5.109782 | 0.484348  |
| C | -1.233351 | -3.248656 | -1.334526 |
| H | 0.937737  | -0.995653 | 1.910228  |
| H | -0.466208 | 1.146235  | 1.056525  |
| H | -4.669146 | 1.705220  | -3.965312 |
| H | -3.969728 | 4.396362  | -0.719564 |
| H | -3.074075 | -5.018128 | -0.745256 |
| H | -5.899451 | -2.532428 | 1.286340  |
| H | -3.856095 | -0.322656 | -4.080493 |
| H | -2.247226 | -0.554627 | -3.399630 |
| H | -3.665349 | -1.236011 | -2.584399 |
| H | -2.574312 | 2.133350  | 1.579488  |
| H | -1.409473 | 3.135604  | 0.692930  |
| H | -2.969788 | 3.797879  | 1.166471  |
| H | -4.955898 | 4.357474  | -4.160134 |
| H | -6.328596 | 3.938443  | -3.134551 |
| H | -5.195482 | 5.196033  | -2.617445 |
| H | -1.319745 | -4.201198 | -1.865743 |
| H | -0.952956 | -2.489041 | -2.066498 |
| H | -0.392376 | -3.356347 | -0.637531 |
| H | -6.243162 | -5.178715 | -0.326957 |
| H | -4.942147 | -6.047895 | 0.492809  |
| H | -6.064892 | -5.037287 | 1.423632  |
| H | -5.062158 | 0.433412  | 0.324574  |
| H | -5.473170 | -0.402367 | 1.827871  |
| H | -3.888882 | 0.341269  | 1.641753  |
| H | 0.282956  | -1.753719 | 0.509436  |

|   |           |           |           |
|---|-----------|-----------|-----------|
| H | -0.835492 | -0.422028 | -1.658491 |
| H | 1.355339  | -0.070548 | -1.453920 |
| C | -1.342934 | -0.169974 | 2.480097  |
| C | -1.752955 | -1.452086 | 2.882921  |
| C | -1.375321 | 0.860409  | 3.433613  |
| C | -2.219273 | -1.680888 | 4.177305  |
| H | -1.700534 | -2.281112 | 2.186232  |
| C | -1.838601 | 0.632475  | 4.731208  |
| H | -1.011153 | 1.849027  | 3.167711  |
| C | -2.271973 | -0.638903 | 5.105747  |
| H | -2.534687 | -2.681011 | 4.462115  |
| H | -1.849301 | 1.448688  | 5.448524  |
| H | -2.632499 | -0.820822 | 6.114380  |

#### C<sub>4</sub>

E= -2685.5143616au

|   |           |           |           |
|---|-----------|-----------|-----------|
| C | 2.548011  | 2.469837  | -0.203107 |
| C | 2.016305  | 1.491480  | 0.679962  |
| C | 1.693135  | 1.900891  | 2.008989  |
| C | 1.867927  | 3.232353  | 2.397597  |
| C | 2.340714  | 4.209133  | 1.520504  |
| C | 2.691157  | 3.794334  | 0.237640  |
| P | 1.435522  | -0.260849 | 0.298941  |
| C | -4.159691 | -0.793783 | 2.743516  |
| O | -4.907474 | -1.720427 | 2.904515  |
| C | 1.131949  | 0.951485  | 3.047810  |
| C | 2.438074  | 5.658967  | 1.929691  |
| C | 2.998510  | 2.215418  | -1.628178 |
| C | 1.334878  | -0.563352 | -1.615007 |
| C | -0.111668 | -1.069046 | -1.873373 |
| B | -1.294924 | -0.292593 | -1.161327 |
| O | -4.565785 | 0.398539  | 2.261958  |
| C | -1.208906 | 1.276837  | -0.927192 |
| C | -1.564376 | 1.876271  | 0.282712  |
| C | -1.447510 | 3.232731  | 0.544492  |
| C | -0.961804 | 4.073122  | -0.455525 |
| C | -0.610342 | 3.534281  | -1.689063 |
| C | -0.738151 | 2.163363  | -1.898852 |
| F | -1.997893 | 1.097651  | 1.314016  |
| F | -0.360185 | 1.698969  | -3.108773 |
| F | -0.121885 | 4.324646  | -2.651398 |
| F | -0.818525 | 5.379323  | -0.222653 |
| F | -1.778339 | 3.730637  | 1.741413  |

|   |           |           |           |
|---|-----------|-----------|-----------|
| C | -2.661726 | -1.024047 | -0.858559 |
| C | -3.899393 | -0.362221 | -0.974285 |
| C | -5.129362 | -0.985447 | -0.790688 |
| C | -5.166640 | -2.334326 | -0.449670 |
| C | -3.973532 | -3.040780 | -0.313218 |
| C | -2.764231 | -2.388802 | -0.527319 |
| F | -3.948689 | 0.939372  | -1.310094 |
| F | -6.267104 | -0.303367 | -0.938344 |
| F | -6.330903 | -2.947327 | -0.267017 |
| F | -4.000402 | -4.335451 | 0.013775  |
| F | -1.662652 | -3.149314 | -0.371030 |
| C | 2.685528  | -1.424634 | 1.079244  |
| C | 4.097193  | -1.315739 | 0.979608  |
| C | 4.907729  | -2.227204 | 1.666863  |
| C | 4.383019  | -3.254984 | 2.450472  |
| C | 2.994309  | -3.359751 | 2.532759  |
| C | 2.137467  | -2.470426 | 1.873649  |
| C | 4.794939  | -0.273479 | 0.139640  |
| C | 5.284713  | -4.204245 | 3.203103  |
| C | 0.647803  | -2.690229 | 2.054510  |
| H | -0.307412 | -0.997390 | -2.959481 |
| H | 1.410949  | 0.424798  | -2.060728 |
| H | 1.610233  | 3.514004  | 3.416400  |
| H | 3.096544  | 4.525622  | -0.459395 |
| H | 2.558039  | -4.156545 | 3.131621  |
| H | 5.987774  | -2.130097 | 1.577156  |
| H | 1.002087  | 1.469029  | 4.003329  |
| H | 0.155181  | 0.559855  | 2.740610  |
| H | 1.785829  | 0.090644  | 3.221489  |
| H | 3.420598  | 1.221954  | -1.770548 |
| H | 2.180012  | 2.343212  | -2.348957 |
| H | 3.769703  | 2.941767  | -1.904959 |
| H | 1.540672  | 6.208937  | 1.615856  |
| H | 2.526569  | 5.766774  | 3.015707  |
| H | 3.299378  | 6.152127  | 1.465809  |
| H | 0.472618  | -3.547614 | 2.712196  |
| H | 0.157582  | -1.819062 | 2.501378  |
| H | 0.131886  | -2.889650 | 1.111728  |
| H | 5.489654  | -3.834396 | 4.216855  |
| H | 4.828159  | -5.194539 | 3.306130  |
| H | 6.250201  | -4.324259 | 2.700273  |
| H | 4.510039  | 0.742416  | 0.425330  |
| H | 5.880498  | -0.361509 | 0.246355  |

|   |           |           |           |
|---|-----------|-----------|-----------|
| H | 4.559213  | -0.402181 | -0.921996 |
| H | -0.171760 | -2.136300 | -1.651942 |
| H | -3.787717 | 0.968905  | 2.129552  |
| H | -3.077192 | -0.832675 | 2.969378  |
| C | 2.356403  | -1.460494 | -2.287170 |
| C | 2.554073  | -2.791643 | -1.884106 |
| C | 3.076732  | -0.998285 | -3.400914 |
| C | 3.452972  | -3.619973 | -2.555415 |
| H | 2.006045  | -3.186071 | -1.034054 |
| C | 3.977695  | -1.825391 | -4.075442 |
| H | 2.918891  | 0.017050  | -3.755927 |
| C | 4.172580  | -3.140186 | -3.652156 |
| H | 3.591003  | -4.644234 | -2.219180 |
| H | 4.520405  | -1.441158 | -4.935306 |
| H | 4.872461  | -3.787084 | -4.174145 |

## D

E= -2673.3952817au

|   |           |           |           |
|---|-----------|-----------|-----------|
| C | -3.572699 | 2.435576  | -0.189503 |
| C | -3.388296 | 1.167337  | -0.799794 |
| C | -4.320180 | 0.770697  | -1.800769 |
| C | -5.425791 | 1.578736  | -2.089666 |
| C | -5.647868 | 2.796763  | -1.449846 |
| C | -4.693143 | 3.208303  | -0.520497 |
| P | -1.917113 | 0.005360  | -0.598241 |
| C | -4.169218 | -0.498227 | -2.613601 |
| C | -6.867241 | 3.635741  | -1.750040 |
| C | -2.604362 | 3.058083  | 0.794799  |
| C | -0.910551 | 0.406147  | 0.975373  |
| C | 0.351560  | -0.502502 | 0.993829  |
| B | 1.597129  | -0.004963 | 0.205477  |
| C | 1.987666  | 1.546803  | 0.259085  |
| C | 1.331541  | 2.539391  | -0.465918 |
| C | 1.677391  | 3.887229  | -0.400026 |
| C | 2.736706  | 4.280574  | 0.412944  |
| C | 3.432017  | 3.321433  | 1.146337  |
| C | 3.051748  | 1.987381  | 1.044975  |
| F | 0.312251  | 2.208562  | -1.285668 |
| F | 3.755883  | 1.087193  | 1.770388  |
| F | 4.450899  | 3.687583  | 1.932978  |
| F | 3.081326  | 5.568572  | 0.494368  |
| F | 0.999476  | 4.799638  | -1.106260 |
| C | 2.569130  | -0.970360 | -0.590844 |

|   |           |           |           |
|---|-----------|-----------|-----------|
| C | 3.547069  | -0.487181 | -1.485400 |
| C | 4.393642  | -1.309126 | -2.224505 |
| C | 4.298540  | -2.690360 | -2.090703 |
| C | 3.350750  | -3.228547 | -1.224985 |
| C | 2.515644  | -2.376140 | -0.510847 |
| F | 3.706984  | 0.827828  | -1.696814 |
| F | 5.294734  | -0.781929 | -3.059362 |
| F | 5.104194  | -3.490854 | -2.785746 |
| F | 3.249265  | -4.555023 | -1.089124 |
| F | 1.631792  | -2.993722 | 0.295779  |
| C | -2.691152 | -1.607992 | 0.003319  |
| C | -3.666794 | -1.705372 | 1.030680  |
| C | -4.113631 | -2.968835 | 1.437485  |
| C | -3.643723 | -4.151481 | 0.863340  |
| C | -2.698085 | -4.042709 | -0.155836 |
| C | -2.221411 | -2.803047 | -0.602288 |
| C | -4.302830 | -0.508433 | 1.707496  |
| C | -4.166056 | -5.496853 | 1.309762  |
| C | -1.228524 | -2.814881 | -1.749847 |
| H | -0.613783 | 1.452008  | 0.960777  |
| H | -6.126647 | 1.243874  | -2.852123 |
| H | -4.815734 | 4.173640  | -0.032999 |
| H | -2.319504 | -4.948196 | -0.625872 |
| H | -4.856495 | -3.026396 | 2.231212  |
| H | -4.864075 | -0.491226 | -3.459194 |
| H | -3.153971 | -0.596718 | -3.017119 |
| H | -4.368322 | -1.399641 | -2.024473 |
| H | -2.470705 | 2.455825  | 1.698606  |
| H | -1.618448 | 3.211028  | 0.342185  |
| H | -2.969367 | 4.039739  | 1.111233  |
| H | -7.214884 | 3.484537  | -2.777791 |
| H | -7.702308 | 3.378375  | -1.084112 |
| H | -6.663166 | 4.703523  | -1.614774 |
| H | -1.030388 | -3.844220 | -2.065947 |
| H | -1.606817 | -2.262647 | -2.616555 |
| H | -0.271719 | -2.357394 | -1.484990 |
| H | -3.463518 | -6.300677 | 1.066089  |
| H | -4.346864 | -5.518949 | 2.390246  |
| H | -5.118905 | -5.735517 | 0.818298  |
| H | -5.011824 | -0.004990 | 1.041881  |
| H | -4.850195 | -0.826665 | 2.600636  |
| H | -3.576621 | 0.247992  | 2.015180  |
| H | 0.070667  | -1.516359 | 0.695790  |

|    |           |           |          |
|----|-----------|-----------|----------|
| H  | -1.527251 | 0.259967  | 1.866352 |
| Si | 0.831496  | -0.832661 | 2.870567 |
| C  | -0.543401 | -1.931988 | 3.569700 |
| H  | -0.617574 | -2.874202 | 3.014684 |
| H  | -0.327782 | -2.176791 | 4.617580 |
| H  | -1.528328 | -1.454529 | 3.536776 |
| C  | 0.910149  | 0.793282  | 3.840522 |
| H  | 0.024010  | 1.419692  | 3.690518 |
| H  | 0.977788  | 0.573024  | 4.913561 |
| H  | 1.793299  | 1.382878  | 3.573997 |
| C  | 2.480373  | -1.740316 | 3.083698 |
| H  | 2.670535  | -1.886862 | 4.154703 |
| H  | 2.472150  | -2.727268 | 2.611192 |
| H  | 3.321793  | -1.170568 | 2.677334 |

### **D<sub>1</sub>**

**E= -2674.5693308au**

|   |           |           |           |
|---|-----------|-----------|-----------|
| C | -2.198888 | 2.322283  | -0.190840 |
| C | -3.272151 | 2.871786  | 0.566074  |
| C | -3.807949 | 4.108798  | 0.207170  |
| H | -4.627476 | 4.513463  | 0.798159  |
| C | -3.329199 | 4.843310  | -0.883906 |
| C | -2.286902 | 4.293181  | -1.620240 |
| H | -1.896950 | 4.838378  | -2.478020 |
| C | -1.709142 | 3.052765  | -1.301755 |
| C | -3.874100 | 2.177241  | 1.765685  |
| H | -3.147900 | 2.073060  | 2.579946  |
| H | -4.235827 | 1.175962  | 1.514835  |
| H | -4.718929 | 2.752386  | 2.156525  |
| C | -3.927567 | 6.184361  | -1.236101 |
| H | -3.746259 | 6.920635  | -0.442592 |
| H | -5.014528 | 6.115161  | -1.366112 |
| H | -3.502188 | 6.582268  | -2.162705 |
| C | -0.583746 | 2.605264  | -2.215659 |
| H | -0.924535 | 2.601037  | -3.258093 |
| H | -0.202693 | 1.612357  | -1.981920 |
| H | 0.253283  | 3.310391  | -2.154281 |
| C | -2.703102 | -0.622021 | 0.212557  |
| C | -3.228567 | -1.360074 | 1.308554  |
| C | -4.158633 | -2.382033 | 1.063576  |
| H | -4.548030 | -2.936105 | 1.915023  |
| C | -4.605851 | -2.713396 | -0.213021 |
| C | -4.078258 | -1.987869 | -1.280964 |

|   |           |           |           |
|---|-----------|-----------|-----------|
| H | -4.396147 | -2.226273 | -2.294008 |
| C | -3.140626 | -0.967693 | -1.100253 |
| C | -2.880258 | -1.135999 | 2.767183  |
| H | -3.443456 | -1.834572 | 3.392783  |
| H | -3.132385 | -0.127293 | 3.105231  |
| H | -1.820663 | -1.300396 | 2.980318  |
| C | -5.631471 | -3.799544 | -0.432846 |
| H | -5.687167 | -4.477678 | 0.424868  |
| H | -5.399311 | -4.395637 | -1.322614 |
| H | -6.633358 | -3.374987 | -0.581834 |
| C | -2.634184 | -0.274868 | -2.347885 |
| H | -3.047476 | -0.754044 | -3.240617 |
| H | -1.542881 | -0.311626 | -2.426410 |
| H | -2.924139 | 0.781025  | -2.375521 |
| C | 2.300081  | 0.562790  | -0.047512 |
| C | 2.223408  | 1.953306  | -0.180843 |
| F | 1.119709  | 2.624099  | 0.206453  |
| C | 3.232644  | 2.734587  | -0.736832 |
| F | 3.065479  | 4.055719  | -0.879616 |
| C | 4.420117  | 2.134287  | -1.143130 |
| F | 5.405651  | 2.869557  | -1.662200 |
| C | 4.571199  | 0.759108  | -0.992030 |
| F | 5.716509  | 0.168835  | -1.352938 |
| C | 3.523750  | 0.012297  | -0.459915 |
| C | 0.971263  | -1.784863 | -0.210879 |
| C | 0.875813  | -3.025378 | 0.431797  |
| F | 1.000273  | -3.117067 | 1.773039  |
| C | 0.678471  | -4.227436 | -0.243556 |
| F | 0.608205  | -5.383707 | 0.427262  |
| C | 0.558948  | -4.222318 | -1.629693 |
| F | 0.361291  | -5.363706 | -2.293564 |
| C | 0.644065  | -3.014621 | -2.318006 |
| F | 0.519954  | -2.995154 | -3.652090 |
| C | 0.861567  | -1.840946 | -1.606530 |
| F | 0.921606  | -0.703572 | -2.333764 |
| F | 3.755651  | -1.308252 | -0.313689 |
| C | 0.520950  | -0.186900 | 1.998175  |
| H | 0.017322  | -1.127467 | 2.246732  |
| C | -0.576392 | 0.910431  | 1.939697  |
| H | -1.241202 | 0.895093  | 2.804052  |
| H | -0.136305 | 1.908290  | 1.884659  |
| B | 1.165412  | -0.398080 | 0.550571  |
| P | -1.362191 | 0.695322  | 0.239871  |

|    |          |           |           |
|----|----------|-----------|-----------|
| H  | 1.857969 | -0.578474 | -5.532447 |
| H  | 1.572779 | -0.882149 | -4.917834 |
| Si | 1.766528 | 0.055716  | 3.443675  |
| C  | 0.827510 | -0.193962 | 5.074736  |
| H  | 0.028612 | 0.546053  | 5.205820  |
| H  | 0.371082 | -1.190087 | 5.126649  |
| H  | 1.505469 | -0.098562 | 5.932209  |
| C  | 2.516975 | 1.798173  | 3.438249  |
| H  | 3.176852 | 1.959707  | 2.578959  |
| H  | 1.750411 | 2.581839  | 3.421975  |
| H  | 3.117384 | 1.946867  | 4.344619  |
| C  | 3.160279 | -1.225959 | 3.339158  |
| H  | 3.700283 | -1.179077 | 2.386094  |
| H  | 3.890894 | -1.062993 | 4.141208  |
| H  | 2.772607 | -2.245296 | 3.440652  |

### TS<sub>12D</sub>

E= -2674.5430382au

|   |           |           |           |
|---|-----------|-----------|-----------|
| C | -3.172028 | 1.623689  | -0.477171 |
| C | -4.269202 | 1.957392  | 0.358263  |
| C | -5.087474 | 3.039801  | 0.019941  |
| H | -5.922764 | 3.283930  | 0.673307  |
| C | -4.863930 | 3.817742  | -1.117765 |
| C | -3.774954 | 3.487042  | -1.923183 |
| H | -3.572482 | 4.084848  | -2.809146 |
| C | -2.925795 | 2.411000  | -1.633580 |
| C | -4.596467 | 1.211466  | 1.631153  |
| H | -3.791770 | 1.308438  | 2.369311  |
| H | -4.753660 | 0.144154  | 1.452595  |
| H | -5.505242 | 1.614291  | 2.088169  |
| C | -5.782580 | 4.962785  | -1.471743 |
| H | -6.148297 | 5.475171  | -0.575180 |
| H | -6.663292 | 4.606651  | -2.022854 |
| H | -5.278207 | 5.700725  | -2.103910 |
| C | -1.767897 | 2.171192  | -2.582184 |
| H | -1.751455 | 1.148560  | -2.970865 |
| H | -0.804663 | 2.352225  | -2.096835 |
| H | -1.836507 | 2.850696  | -3.437267 |
| C | -3.029500 | -1.346437 | 0.099159  |
| C | -3.228408 | -2.088986 | 1.295731  |
| C | -3.968559 | -3.276372 | 1.248526  |
| H | -4.108682 | -3.831318 | 2.173995  |
| C | -4.533481 | -3.772148 | 0.072697  |

|   |           |           |           |
|---|-----------|-----------|-----------|
| C | -4.328073 | -3.038111 | -1.092943 |
| H | -4.747555 | -3.400228 | -2.028959 |
| C | -3.584862 | -1.852422 | -1.109343 |
| C | -2.696789 | -1.689415 | 2.654259  |
| H | -2.980663 | -2.435885 | 3.401700  |
| H | -3.097218 | -0.728081 | 2.990005  |
| H | -1.607869 | -1.616382 | 2.670695  |
| C | -5.329695 | -5.055164 | 0.071730  |
| H | -4.733063 | -5.894948 | 0.448654  |
| H | -5.671954 | -5.312775 | -0.935399 |
| H | -6.214423 | -4.975730 | 0.715895  |
| C | -3.407190 | -1.171543 | -2.449344 |
| H | -3.872020 | -1.765357 | -3.241990 |
| H | -2.346797 | -1.051321 | -2.700608 |
| H | -3.861258 | -0.174730 | -2.472285 |
| C | 2.353439  | 1.187332  | -0.036757 |
| C | 1.939415  | 2.505245  | -0.246611 |
| F | 0.615798  | 2.788458  | -0.343550 |
| C | 2.802046  | 3.587958  | -0.384063 |
| F | 2.325831  | 4.822226  | -0.592329 |
| C | 4.175010  | 3.373947  | -0.302588 |
| F | 5.027257  | 4.395897  | -0.423478 |
| C | 4.647395  | 2.083101  | -0.090148 |
| F | 5.964784  | 1.861673  | -0.004078 |
| C | 3.742311  | 1.029249  | 0.027457  |
| C | 1.862504  | -1.467140 | -0.482175 |
| C | 1.924925  | -2.685608 | 0.200597  |
| F | 1.526596  | -2.792617 | 1.488694  |
| C | 2.401311  | -3.866513 | -0.369011 |
| F | 2.436029  | -4.999205 | 0.345738  |
| C | 2.844009  | -3.865836 | -1.686397 |
| F | 3.300489  | -4.989557 | -2.247791 |
| C | 2.804061  | -2.680443 | -2.415329 |
| F | 3.222275  | -2.662133 | -3.687719 |
| C | 2.328023  | -1.526628 | -1.803136 |
| F | 2.311261  | -0.409019 | -2.562720 |
| F | 4.286555  | -0.187717 | 0.239076  |
| C | 0.338957  | -0.115524 | 1.412043  |
| H | 0.038524  | -1.162271 | 1.529760  |
| C | -0.981685 | 0.717621  | 1.346765  |
| H | -1.529823 | 0.682021  | 2.288768  |
| H | -0.771879 | 1.770985  | 1.141289  |
| B | 1.307529  | -0.060331 | 0.112610  |

|   |           |           |           |
|---|-----------|-----------|-----------|
| P | -2.004821 | 0.203506  | -0.132300 |
| H | -0.180367 | 0.195132  | -0.982196 |
| H | 0.634787  | 0.324371  | -1.105462 |
| S | 1.232285  | 0.285911  | 3.083433  |
| C | 0.137101  | -0.300219 | 4.524239  |
| H | -0.849268 | 0.177426  | 4.544710  |
| H | -0.015345 | -1.385877 | 4.506437  |
| H | 0.631538  | -0.058632 | 5.473925  |
| C | 1.482117  | 2.156820  | 3.297838  |
| H | 2.247875  | 2.558604  | 2.626662  |
| H | 0.558817  | 2.723235  | 3.127051  |
| H | 1.805888  | 2.365340  | 4.325528  |
| C | 2.896364  | -0.596520 | 3.286663  |
| H | 3.598288  | -0.403775 | 2.471174  |
| H | 3.369743  | -0.264596 | 4.219617  |
| H | 2.759373  | -1.680767 | 3.348973  |

## D<sub>2</sub>

E= -2674.572727au

|   |           |           |           |
|---|-----------|-----------|-----------|
| C | -3.696721 | 2.127178  | 0.039441  |
| C | -3.364446 | 0.967496  | -0.701346 |
| C | -4.017610 | 0.710468  | -1.939798 |
| C | -5.002119 | 1.595195  | -2.381686 |
| C | -5.363662 | 2.733004  | -1.655466 |
| C | -4.696577 | 2.974306  | -0.456190 |
| P | -2.075111 | -0.250332 | -0.187344 |
| C | -3.681382 | -0.464743 | -2.831552 |
| C | -6.428513 | 3.671925  | -2.167264 |
| C | -3.013866 | 2.562095  | 1.317090  |
| C | -0.888300 | 0.136496  | 1.188363  |
| C | 0.453813  | -0.618248 | 0.973671  |
| B | 1.336282  | 0.047747  | -0.290121 |
| C | 1.619196  | 1.642489  | 0.022016  |
| C | 0.704518  | 2.628234  | -0.348333 |
| C | 0.844406  | 3.985901  | -0.066031 |
| C | 1.976713  | 4.425361  | 0.608574  |
| C | 2.931308  | 3.489738  | 0.998661  |
| C | 2.729461  | 2.143645  | 0.705348  |
| F | -0.448237 | 2.293066  | -1.001324 |
| F | 3.688002  | 1.295934  | 1.147403  |
| F | 4.023573  | 3.894099  | 1.665421  |
| F | 2.137654  | 5.724780  | 0.897160  |
| F | -0.115067 | 4.861848  | -0.418946 |



|   |           |           |           |
|---|-----------|-----------|-----------|
| C | 2.664586  | -0.802851 | -0.775341 |
| C | 3.701508  | -0.212688 | -1.511899 |
| C | 4.795678  | -0.903181 | -2.029287 |
| C | 4.891628  | -2.278030 | -1.845848 |
| C | 3.880334  | -2.926799 | -1.149721 |
| C | 2.808883  | -2.187172 | -0.652529 |
| F | 3.682022  | 1.111224  | -1.783080 |
| F | 5.751248  | -0.255437 | -2.715349 |
| F | 5.933134  | -2.964428 | -2.338754 |
| F | 3.935521  | -4.258005 | -0.968777 |
| F | 1.859845  | -2.935939 | -0.016277 |
| C | -2.792980 | -1.916211 | 0.110085  |
| C | -3.818000 | -2.074618 | 1.078899  |
| C | -4.327484 | -3.352263 | 1.318804  |
| C | -3.863055 | -4.479277 | 0.635848  |
| C | -2.851605 | -4.299744 | -0.308317 |
| C | -2.296961 | -3.045991 | -0.593510 |
| C | -4.392228 | -0.923109 | 1.875466  |
| C | -4.452317 | -5.843685 | 0.898474  |
| C | -1.192684 | -2.993489 | -1.630214 |
| H | -0.732031 | 1.213707  | 1.211576  |
| H | -5.496685 | 1.388489  | -3.328077 |
| H | -4.950166 | 3.861085  | 0.119308  |
| H | -2.468885 | -5.165685 | -0.842635 |
| H | -5.108573 | -3.468832 | 2.066519  |
| H | -4.331952 | -0.470367 | -3.710101 |
| H | -2.648438 | -0.409805 | -3.198268 |
| H | -3.803888 | -1.426672 | -2.323935 |
| H | -2.857936 | 1.747662  | 2.027943  |
| H | -2.039245 | 3.009644  | 1.091767  |
| H | -3.612556 | 3.325440  | 1.821453  |
| H | -6.114069 | 4.148768  | -3.103866 |
| H | -7.362897 | 3.137472  | -2.376105 |
| H | -6.645209 | 4.464565  | -1.445165 |
| H | -1.053802 | -3.984157 | -2.071509 |
| H | -1.417341 | -2.305001 | -2.451824 |
| H | -0.232265 | -2.695753 | -1.199932 |
| H | -3.755019 | -6.640926 | 0.623147  |
| H | -4.716330 | -5.968842 | 1.953889  |
| H | -5.369858 | -5.992902 | 0.313965  |
| H | -4.904231 | -0.195233 | 1.237357  |
| H | -5.117157 | -1.292083 | 2.606143  |
| H | -3.621772 | -0.382288 | 2.437175  |

|    |           |           |           |
|----|-----------|-----------|-----------|
| H  | 0.207435  | -1.654871 | 0.711023  |
| H  | -1.409295 | -0.140930 | 2.112604  |
| H  | -1.245853 | -0.381971 | -1.312346 |
| H  | 0.628409  | 0.030430  | -1.293749 |
| Si | 1.242502  | -0.848270 | 2.716991  |
| C  | 0.120759  | -2.050956 | 3.684467  |
| H  | 0.054410  | -3.022725 | 3.179488  |
| H  | 0.529234  | -2.230618 | 4.687102  |
| H  | -0.903335 | -1.679465 | 3.819391  |
| C  | 1.301010  | 0.781428  | 3.696162  |
| H  | 0.344530  | 1.319052  | 3.691407  |
| H  | 1.549131  | 0.572481  | 4.744614  |
| H  | 2.068081  | 1.458804  | 3.308134  |
| C  | 2.975994  | -1.602745 | 2.693670  |
| H  | 3.344181  | -1.704699 | 3.722746  |
| H  | 2.977426  | -2.597663 | 2.237478  |
| H  | 3.681201  | -0.973319 | 2.144642  |

### D<sub>3</sub>

E= -2863.15657au

|   |           |           |           |
|---|-----------|-----------|-----------|
| C | 3.840987  | 1.949993  | -0.494244 |
| C | 3.477399  | 0.897430  | 0.382011  |
| C | 4.155330  | 0.747374  | 1.624717  |
| C | 5.186005  | 1.633936  | 1.941955  |
| C | 5.573506  | 2.667857  | 1.086402  |
| C | 4.885407  | 2.803952  | -0.117987 |
| P | 2.119534  | -0.305422 | 0.036742  |
| C | -0.441515 | 1.290575  | 3.514305  |
| O | -1.420661 | 1.917015  | 3.424452  |
| C | 3.800762  | -0.309148 | 2.648074  |
| C | 6.704072  | 3.596486  | 1.456024  |
| C | 3.158616  | 2.256918  | -1.809957 |
| C | 0.935889  | 0.020576  | -1.353973 |
| C | -0.410987 | -0.724421 | -1.142500 |
| B | -1.320894 | -0.006921 | 0.071453  |
| O | 0.541900  | 0.664884  | 3.646969  |
| C | -1.562760 | 1.586197  | -0.283274 |
| C | -0.680633 | 2.576978  | 0.147029  |
| C | -0.805664 | 3.934435  | -0.144120 |
| C | -1.881827 | 4.364156  | -0.910951 |
| C | -2.797569 | 3.422652  | -1.373263 |
| C | -2.618100 | 2.080035  | -1.052914 |
| F | 0.417921  | 2.247462  | 0.895856  |

F -3.542666 1.226987 -1.553818  
 F -3.833228 3.818587 -2.128880  
 F -2.027027 5.661765 -1.214392  
 F 0.104520 4.820961 0.296819  
 C -2.683074 -0.815530 0.535373  
 C -3.748474 -0.183445 1.192221  
 C -4.873355 -0.842415 1.685521  
 C -4.972659 -2.223445 1.560471  
 C -3.934013 -2.911516 0.946763  
 C -2.832275 -2.203560 0.470677  
 F -3.728907 1.150445 1.405617  
 F -5.855665 -0.157474 2.292696  
 F -6.043477 -2.878852 2.031917  
 F -3.992496 -4.249252 0.825954  
 F -1.857825 -2.985009 -0.079657  
 C 2.738779 -2.030072 -0.097556  
 C 3.732563 -2.354443 -1.056288  
 C 4.166665 -3.678278 -1.155505  
 C 3.653037 -4.693147 -0.344825  
 C 2.669003 -4.351987 0.584197  
 C 2.191865 -3.044735 0.733933  
 C 4.344160 -1.339165 -1.997556  
 C 4.161226 -6.109945 -0.454935  
 C 1.107535 -2.812310 1.766728  
 H 0.780300 1.098331 -1.404180  
 H 5.697648 1.512564 2.893876  
 H 5.159823 3.609386 -0.794561  
 H 2.247263 -5.129608 1.216091  
 H 4.926336 -3.922234 -1.894422  
 H 4.499416 -0.267041 3.488034  
 H 2.796112 -0.148894 3.055989  
 H 3.842683 -1.322626 2.236718  
 H 3.002256 1.373585 -2.433480  
 H 2.183574 2.729449 -1.645523  
 H 3.763190 2.960702 -2.388364  
 H 6.585358 3.979720 2.475881  
 H 7.669551 3.075836 1.417765  
 H 6.760106 4.451993 0.776369  
 H 0.925291 -3.735211 2.323885  
 H 1.372957 -2.040786 2.496787  
 H 0.159623 -2.519484 1.305860  
 H 3.384441 -6.835069 -0.192098  
 H 4.509719 -6.333052 -1.468476

H 5.006895 -6.275994 0.225649  
 H 4.805495 -0.502652 -1.464007  
 H 5.117979 -1.809687 -2.610060  
 H 3.601756 -0.922263 -2.689210  
 H -0.175404 -1.749220 -0.828857  
 H 1.465955 -0.275951 -2.266564  
 H 1.321862 -0.279930 1.190126  
 H -0.640456 -0.022887 1.093462  
 Si -1.151668 -1.022233 -2.897316  
 C -0.006786 -2.266903 -3.781202  
 H 0.045099 -3.215345 -3.232256  
 H -0.388971 -2.490194 -4.785424  
 H 1.021047 -1.901864 -3.906057  
 C -1.172219 0.565685 -3.944367  
 H -0.214472 1.100841 -3.930307  
 H -1.387046 0.314809 -4.990998  
 H -1.949949 1.258516 -3.609114  
 C -2.887867 -1.770465 -2.895329  
 H -3.221679 -1.923221 -3.929807  
 H -2.909360 -2.741153 -2.390006  
 H -3.608026 -1.111772 -2.403003

### TS34D

E= -2863.1255568au

C -3.703898 2.286668 0.067697  
 C -3.462037 1.087118 -0.644651  
 C -4.241740 0.796618 -1.801563  
 C -5.266709 1.671064 -2.169151  
 C -5.543375 2.840588 -1.458156  
 C -4.743254 3.126955 -0.354162  
 P -2.131392 -0.159021 -0.289627  
 C 0.647253 0.039014 -2.586292  
 O 1.616470 0.116092 -3.309823  
 C -3.999382 -0.408008 -2.687620  
 C -6.656082 3.765809 -1.887996  
 C -2.882497 2.776817 1.240954  
 C -0.948617 0.236458 1.114795  
 C 0.368872 -0.585711 1.012948  
 B 1.555575 0.026130 0.130237  
 O -0.595918 -0.105040 -2.818691  
 C 1.835975 1.604944 0.315890  
 C 1.022033 2.627703 -0.172970  
 C 1.252912 3.981938 0.061034

C 2. 356277 4. 366121 0. 814174  
C 3. 204259 3. 386119 1. 325184  
C 2. 930694 2. 047591 1. 065838  
F -0. 077291 2. 339619 -0. 911496  
F 3. 783805 1. 145334 1. 598642  
F 4. 265339 3. 738931 2. 060792  
F 2. 593440 5. 657991 1. 057987  
F 0. 408091 4. 905625 -0. 416446  
C 2. 733665 -0. 884104 -0. 445918  
C 3. 803382 -0. 339985 -1. 182068  
C 4. 803757 -1. 105500 -1. 775845  
C 4. 761599 -2. 490538 -1. 674963  
C 3. 716607 -3. 088086 -0. 976935  
C 2. 738415 -2. 288116 -0. 398899  
F 3. 924832 0. 984177 -1. 348719  
F 5. 798931 -0. 517846 -2. 448430  
F 5. 710870 -3. 240545 -2. 237614  
F 3. 657595 -4. 422745 -0. 871755  
F 1. 753272 -2. 970850 0. 237759  
C -2. 906193 -1. 775075 0. 195305  
C -3. 901650 -1. 834906 1. 205203  
C -4. 438841 -3. 077887 1. 558945  
C -4. 036755 -4. 266021 0. 949340  
C -3. 059182 -4. 186569 -0. 043825  
C -2. 479414 -2. 975060 -0. 436865  
C -4. 449381 -0. 621251 1. 925919  
C -4. 633013 -5. 595526 1. 344791  
C -1. 404626 -3. 044910 -1. 503052  
H -0. 739860 1. 302322 1. 106999  
H -5. 859154 1. 431727 -3. 049521  
H -4. 922812 4. 042964 0. 203800  
H -2. 727794 -5. 099352 -0. 534040  
H -5. 199963 -3. 112333 2. 335152  
H -4. 717469 -0. 416269 -3. 512498  
H -2. 996145 -0. 383807 -3. 129086  
H -4. 108763 -1. 355218 -2. 149119  
H -2. 730303 2. 019276 2. 013992  
H -1. 897813 3. 122028 0. 905783  
H -3. 377196 3. 628904 1. 715508  
H -6. 468139 4. 171023 -2. 889995  
H -7. 617556 3. 239639 -1. 929791  
H -6. 763916 4. 610576 -1. 200773  
H -1. 452540 -4. 011539 -2. 013209

H -1. 482060 -2. 264655 -2. 262349  
H -0. 402567 -2. 967887 -1. 065056  
H -3. 862018 -6. 279584 1. 720087  
H -5. 389018 -5. 479839 2. 127364  
H -5. 108220 -6. 087644 0. 487411  
H -5. 088267 -0. 015247 1. 275231  
H -5. 049800 -0. 934341 2. 784959  
H -3. 663250 0. 038571 2. 305065  
H 0. 128873 -1. 598663 0. 679315  
H -1. 490838 0. 026130 2. 042216  
H -1. 290990 -0. 206978 -1. 634056  
H 0. 867512 0. 080996 -1. 421441  
S 0. 938227 -0. 937587 2. 852213  
C -0. 310821 -2. 182857 3. 554258  
H -0. 114023 -2. 357994 4. 619382  
H -1. 352551 -1. 854804 3. 462224  
H -0. 225138 -3. 147567 3. 039979  
C 0. 882179 0. 657854 3. 878194  
H -0. 087725 1. 166324 3. 832734  
H 1. 074452 0. 419265 4. 931889  
H 1. 650153 1. 372221 3. 562621  
C 2. 664428 -1. 689709 3. 022129  
H 2. 873879 -1. 852203 4. 087290  
H 2. 742628 -2. 657396 2. 517601  
H 3. 442823 -1. 030784 2. 628197

#### D<sub>4</sub>

E= -2863.1560119au

C 3. 441905 2. 525067 -0. 060363  
C 3. 281536 1. 285753 0. 612381  
C 4. 118151 1. 017252 1. 733417  
C 5. 111278 1. 933052 2. 097998  
C 5. 307086 3. 132621 1. 415900  
C 4. 447905 3. 407958 0. 352688  
P 1. 955998 -0. 014808 0. 321629  
C -0. 394655 0. 910564 3. 511897  
O -1. 244008 1. 054743 4. 352322  
C 3. 982004 -0. 223182 2. 592118  
C 6. 405632 4. 091892 1. 807109  
C 2. 566386 3. 004829 -1. 199448  
C 0. 937385 0. 275501 -1. 258107  
C -0. 308550 -0. 656176 -1. 229371

|   |           |           |           |
|---|-----------|-----------|-----------|
| B | -1.573862 | -0.143524 | -0.471066 |
| O | -0.315922 | -0.182959 | 2.732365  |
| C | -2.013709 | 1.387780  | -0.637263 |
| C | -1.365331 | 2.468223  | -0.044999 |
| C | -1.764295 | 3.791485  | -0.213875 |
| C | -2.877512 | 4.070569  | -1.001258 |
| C | -3.569906 | 3.022732  | -1.604979 |
| C | -3.132932 | 1.717787  | -1.402911 |
| F | -0.287873 | 2.258367  | 0.749622  |
| F | -3.835238 | 0.731644  | -2.005340 |
| F | -4.639336 | 3.278218  | -2.366477 |
| F | -3.274681 | 5.332013  | -1.183243 |
| F | -1.083570 | 4.786689  | 0.365680  |
| C | -2.512955 | -1.077003 | 0.386539  |
| C | -3.456225 | -0.556710 | 1.296536  |
| C | -4.258634 | -1.347830 | 2.113361  |
| C | -4.147470 | -2.732815 | 2.048291  |
| C | -3.229344 | -3.306058 | 1.172354  |
| C | -2.439843 | -2.482470 | 0.379734  |
| F | -3.618748 | 0.765003  | 1.443496  |
| F | -5.132845 | -0.789946 | 2.954013  |
| F | -4.911851 | -3.505951 | 2.816817  |
| F | -3.113567 | -4.637247 | 1.102682  |
| F | -1.572684 | -3.128029 | -0.429151 |
| C | 2.889083  | -1.567485 | -0.179584 |
| C | 3.914884  | -1.583399 | -1.161881 |
| C | 4.512949  | -2.800340 | -1.510269 |
| C | 4.150209  | -4.010541 | -0.917195 |
| C | 3.150753  | -3.978893 | 0.054737  |
| C | 2.516559  | -2.790353 | 0.439202  |
| C | 4.442960  | -0.344190 | -1.853565 |
| C | 4.837450  | -5.301794 | -1.293106 |
| C | 1.448385  | -2.897728 | 1.510338  |
| H | 0.626925  | 1.315723  | -1.305280 |
| H | 5.742207  | 1.700202  | 2.953347  |
| H | 4.556305  | 4.350307  | -0.180384 |
| H | 2.849389  | -4.907741 | 0.534382  |
| H | 5.291954  | -2.797355 | -2.270314 |
| H | 4.629809  | -0.148274 | 3.470503  |
| H | 2.954301  | -0.356933 | 2.951914  |
| H | 4.253247  | -1.137393 | 2.054008  |
| H | 2.521194  | 2.297630  | -2.032541 |
| H | 1.542226  | 3.193207  | -0.859450 |

|    |           |           |           |
|----|-----------|-----------|-----------|
| H  | 2.951649  | 3.948293  | -1.597042 |
| H  | 6.646391  | 4.012360  | 2.872538  |
| H  | 7.329192  | 3.886951  | 1.248840  |
| H  | 6.124817  | 5.129907  | 1.598782  |
| H  | 1.459600  | -3.899309 | 1.951367  |
| H  | 1.587973  | -2.176581 | 2.319823  |
| H  | 0.443303  | -2.734126 | 1.109223  |
| H  | 4.181126  | -6.164927 | -1.140231 |
| H  | 5.155222  | -5.296423 | -2.341306 |
| H  | 5.735833  | -5.463507 | -0.682345 |
| H  | 5.081846  | 0.245265  | -1.187134 |
| H  | 5.041353  | -0.625246 | -2.725865 |
| H  | 3.650640  | 0.324464  | -2.198593 |
| H  | -0.008634 | -1.645572 | -0.873229 |
| H  | 1.564217  | 0.084517  | -2.133294 |
| H  | 0.427481  | -0.096435 | 2.078415  |
| H  | 0.395548  | 1.656475  | 3.308092  |
| Si | -0.766320 | -1.081664 | -3.092828 |
| C  | 0.636306  | -2.187044 | -3.726368 |
| H  | 0.693387  | -3.118575 | -3.151218 |
| H  | 0.455403  | -2.454352 | -4.775225 |
| H  | 1.619889  | -1.707965 | -3.672563 |
| C  | -0.851659 | 0.503479  | -4.127671 |
| H  | 0.041662  | 1.128429  | -4.018254 |
| H  | -0.939116 | 0.240687  | -5.189517 |
| H  | -1.724402 | 1.113403  | -3.871616 |
| C  | -2.395188 | -2.025346 | -3.284773 |
| H  | -2.568062 | -2.224499 | -4.350235 |
| H  | -2.374276 | -2.988696 | -2.766566 |
| H  | -3.252370 | -1.455117 | -2.914634 |

## E

E= -2601.7559048au

|   |           |           |           |
|---|-----------|-----------|-----------|
| C | -2.318510 | 2.248420  | 0.547335  |
| C | -1.972465 | 1.241527  | -0.392527 |
| C | -1.899843 | 1.603278  | -1.771102 |
| C | -2.139005 | 2.923879  | -2.161793 |
| C | -2.430509 | 3.930891  | -1.240124 |
| C | -2.531832 | 3.560668  | 0.099517  |
| P | -1.383545 | -0.515528 | -0.104391 |
| C | -1.545446 | 0.612020  | -2.863601 |
| C | -2.590632 | 5.369424  | -1.669019 |
| C | -2.493987 | 2.043728  | 2.040495  |

|   |           |           |           |
|---|-----------|-----------|-----------|
| C | -0.789280 | -0.693221 | 1.724155  |
| C | 0.695002  | -1.132944 | 1.712550  |
| B | 1.691173  | -0.343906 | 0.770000  |
| C | 1.510035  | 1.193911  | 0.467525  |
| C | 1.676264  | 1.713024  | -0.821945 |
| C | 1.471012  | 3.051550  | -1.133611 |
| C | 1.110672  | 3.937843  | -0.120751 |
| C | 0.961799  | 3.474744  | 1.183199  |
| C | 1.159359  | 2.124354  | 1.448658  |
| F | 1.993331  | 0.886983  | -1.836790 |
| F | 0.985768  | 1.720593  | 2.726894  |
| F | 0.596423  | 4.316211  | 2.157516  |
| F | 0.888683  | 5.223607  | -0.405350 |
| F | 1.598034  | 3.492230  | -2.389474 |
| C | 3.006003  | -1.050538 | 0.251758  |
| C | 4.237258  | -0.372916 | 0.223890  |
| C | 5.428052  | -0.963947 | -0.186175 |
| C | 5.419595  | -2.289370 | -0.613045 |
| C | 4.225257  | -3.005363 | -0.613999 |
| C | 3.057633  | -2.386027 | -0.178284 |
| F | 4.321650  | 0.902411  | 0.639107  |
| F | 6.574097  | -0.275486 | -0.172967 |
| F | 6.548690  | -2.869703 | -1.017279 |
| F | 4.210338  | -4.275578 | -1.031085 |
| F | 1.942970  | -3.136242 | -0.223491 |
| C | -2.819617 | -1.684178 | -0.427269 |
| C | -4.204470 | -1.380540 | -0.324396 |
| C | -5.145147 | -2.327758 | -0.748645 |
| C | -4.786033 | -3.573270 | -1.262759 |
| C | -3.425505 | -3.863229 | -1.350880 |
| C | -2.441801 | -2.953677 | -0.949321 |
| C | -4.760161 | -0.090410 | 0.233317  |
| C | -5.832043 | -4.579451 | -1.679245 |
| C | -1.002675 | -3.403785 | -1.065645 |
| H | 1.102239  | -1.010535 | 2.732397  |
| H | -0.854087 | 0.288683  | 2.185128  |
| H | -2.076798 | 3.173363  | -3.218906 |
| H | -2.790593 | 4.318838  | 0.836600  |
| H | -3.111640 | -4.827266 | -1.745888 |
| H | -6.200893 | -2.077894 | -0.665300 |
| H | -1.663722 | 1.078756  | -3.846532 |
| H | -0.505602 | 0.275273  | -2.774402 |
| H | -2.177974 | -0.281803 | -2.843321 |

|   |           |           |           |
|---|-----------|-----------|-----------|
| H | -2.832293 | 1.044309  | 2.308203  |
| H | -1.564834 | 2.244878  | 2.589885  |
| H | -3.235997 | 2.752419  | 2.422527  |
| H | -3.320174 | 5.897758  | -1.045627 |
| H | -1.635489 | 5.903636  | -1.577656 |
| H | -2.912419 | 5.446430  | -2.712796 |
| H | -0.937651 | -4.332247 | -1.641625 |
| H | -0.366271 | -2.655302 | -1.546050 |
| H | -0.573890 | -3.602617 | -0.077918 |
| H | -6.743240 | -4.087059 | -2.035556 |
| H | -5.464015 | -5.234333 | -2.476375 |
| H | -6.118604 | -5.222968 | -0.836475 |
| H | -4.531866 | 0.771644  | -0.399108 |
| H | -5.848670 | -0.160463 | 0.321868  |
| H | -4.362696 | 0.117419  | 1.228504  |
| H | 0.760193  | -2.203739 | 1.507636  |
| C | -1.594460 | -1.618616 | 2.617716  |
| F | -1.580136 | -2.900714 | 2.187456  |
| F | -1.091837 | -1.627733 | 3.878308  |
| F | -2.892771 | -1.248228 | 2.728354  |

**E<sub>1</sub>**

**E= -2602.9242087au**

|   |          |           |           |
|---|----------|-----------|-----------|
| C | 3.015303 | -0.627866 | -0.452256 |
| C | 4.335982 | -0.177940 | -0.187289 |
| C | 5.420525 | -0.954573 | -0.614068 |
| H | 6.426060 | -0.596870 | -0.402239 |
| C | 5.263643 | -2.164249 | -1.290593 |
| C | 3.962146 | -2.592301 | -1.550856 |
| H | 3.807376 | -3.526861 | -2.086295 |
| C | 2.842759 | -1.852484 | -1.154616 |
| C | 4.664791 | 1.104017  | 0.542672  |
| H | 4.138286 | 1.166879  | 1.496992  |
| H | 4.400181 | 1.991149  | -0.039824 |
| H | 5.737439 | 1.150517  | 0.754912  |
| C | 6.457756 | -2.990244 | -1.705615 |
| H | 6.256706 | -3.553354 | -2.623428 |
| H | 6.722603 | -3.719902 | -0.928559 |
| H | 7.339268 | -2.363262 | -1.876416 |
| C | 1.482366 | -2.418690 | -1.508002 |
| H | 1.593919 | -3.298800 | -2.149058 |
| H | 0.854553 | -1.690538 | -2.031170 |
| H | 0.924746 | -2.736151 | -0.618663 |

|   |           |           |           |
|---|-----------|-----------|-----------|
| C | 1.792366  | 2.118017  | -0.308673 |
| C | 1.905625  | 3.169723  | 0.633330  |
| C | 2.091583  | 4.482115  | 0.181242  |
| H | 2.182761  | 5.273431  | 0.922479  |
| C | 2.172008  | 4.811134  | -1.171089 |
| C | 2.051351  | 3.769239  | -2.089739 |
| H | 2.104780  | 3.990676  | -3.153729 |
| C | 1.847047  | 2.442388  | -1.696499 |
| C | 1.848810  | 2.970038  | 2.126250  |
| H | 2.036240  | 3.916497  | 2.642418  |
| H | 2.592537  | 2.252882  | 2.477853  |
| H | 0.870663  | 2.611457  | 2.457548  |
| C | 2.348387  | 6.241149  | -1.622960 |
| H | 1.377276  | 6.728402  | -1.784174 |
| H | 2.900197  | 6.298440  | -2.567479 |
| H | 2.888556  | 6.833656  | -0.876758 |
| C | 1.691620  | 1.416292  | -2.802212 |
| H | 1.716538  | 1.909429  | -3.778732 |
| H | 0.739998  | 0.877082  | -2.720851 |
| H | 2.488171  | 0.664111  | -2.791035 |
| C | -1.729708 | -1.761475 | 0.285931  |
| C | -2.071306 | -2.001579 | -1.052773 |
| F | -2.259092 | -0.966746 | -1.890990 |
| C | -2.204703 | -3.276126 | -1.589584 |
| F | -2.519537 | -3.450028 | -2.878676 |
| C | -2.006363 | -4.385984 | -0.769656 |
| F | -2.137306 | -5.615874 | -1.266592 |
| C | -1.667299 | -4.203394 | 0.568328  |
| F | -1.482710 | -5.263692 | 1.361389  |
| C | -1.525363 | -2.909119 | 1.064298  |
| C | -2.717489 | 0.761778  | 0.471467  |
| C | -2.437853 | 2.131388  | 0.344607  |
| F | -1.181992 | 2.583354  | 0.493361  |
| C | -3.403508 | 3.082900  | 0.030731  |
| F | -3.078633 | 4.373612  | -0.095697 |
| C | -4.723716 | 2.678798  | -0.151394 |
| F | -5.663784 | 3.576973  | -0.443092 |
| C | -5.058262 | 1.332212  | -0.026646 |
| F | -6.327177 | 0.943399  | -0.190394 |
| C | -4.061933 | 0.408037  | 0.269078  |
| F | -4.453967 | -0.871963 | 0.391852  |
| F | -1.203666 | -2.799860 | 2.366832  |
| B | -1.616001 | -0.295760 | 0.863716  |

|   |           |           |           |
|---|-----------|-----------|-----------|
| P | 1.432106  | 0.297350  | -0.053331 |
| C | -0.541033 | 0.054114  | 1.976189  |
| H | -0.871909 | -0.480334 | 2.880835  |
| H | -0.555442 | 1.114571  | 2.229259  |
| C | 0.899545  | -0.399939 | 1.653666  |
| H | 0.851608  | -1.449729 | 1.337681  |
| C | 1.752409  | -0.496484 | 2.918390  |
| H | -3.271690 | -1.332438 | -4.340714 |
| H | -3.556545 | -1.047890 | -4.964498 |
| F | 3.067987  | -0.651940 | 2.664647  |
| F | 1.624349  | 0.558333  | 3.754413  |
| F | 1.362041  | -1.585551 | 3.631288  |

### TS<sub>12E</sub>

E= -2602.899729au

|   |          |           |           |
|---|----------|-----------|-----------|
| C | 3.396293 | -0.558413 | -0.162139 |
| C | 4.638547 | 0.007838  | 0.221471  |
| C | 5.815636 | -0.715219 | -0.012730 |
| H | 6.761900 | -0.270255 | 0.286646  |
| C | 5.818960 | -1.979307 | -0.599633 |
| C | 4.586439 | -2.527495 | -0.960349 |
| H | 4.557004 | -3.515093 | -1.415954 |
| C | 3.381579 | -1.848061 | -0.762376 |
| C | 4.782300 | 1.350512  | 0.897916  |
| H | 4.144140 | 1.414262  | 1.782122  |
| H | 4.519217 | 2.182344  | 0.237757  |
| H | 5.815618 | 1.498076  | 1.225681  |
| C | 7.103727 | -2.737775 | -0.831753 |
| H | 7.977044 | -2.144135 | -0.544618 |
| H | 7.216939 | -3.015826 | -1.886718 |
| H | 7.125726 | -3.668350 | -0.250821 |
| C | 2.110880 | -2.546403 | -1.193405 |
| H | 2.348607 | -3.470094 | -1.729557 |
| H | 1.494128 | -1.926531 | -1.848880 |
| H | 1.485154 | -2.828997 | -0.337269 |
| C | 1.941041 | 2.126159  | -0.377394 |
| C | 1.880825 | 3.237946  | 0.498949  |
| C | 1.948108 | 4.532137  | -0.034740 |
| H | 1.903334 | 5.374134  | 0.652506  |
| C | 2.080306 | 4.781425  | -1.399401 |
| C | 2.148363 | 3.677379  | -2.250444 |
| H | 2.258952 | 3.838091  | -3.320630 |
| C | 2.068606 | 2.364097  | -1.779785 |

|   |           |           |           |
|---|-----------|-----------|-----------|
| C | 1.754477  | 3.131090  | 1.997746  |
| H | 1.914219  | 4.109687  | 2.459949  |
| H | 2.480798  | 2.441872  | 2.431218  |
| H | 0.763563  | 2.787614  | 2.306245  |
| C | 2.126231  | 6.189595  | -1.941616 |
| H | 2.835585  | 6.276398  | -2.772064 |
| H | 2.416927  | 6.907905  | -1.168355 |
| H | 1.143421  | 6.497324  | -2.322715 |
| C | 2.139024  | 1.255788  | -2.813134 |
| H | 2.215681  | 1.684189  | -3.816767 |
| H | 1.250631  | 0.612648  | -2.794274 |
| H | 3.007823  | 0.604533  | -2.664996 |
| C | -1.651114 | -1.680613 | -0.113640 |
| C | -1.371467 | -2.271110 | -1.348522 |
| F | -0.792575 | -1.552632 | -2.338521 |
| C | -1.639069 | -3.607240 | -1.639873 |
| F | -1.328634 | -4.120348 | -2.837496 |
| C | -2.236303 | -4.410621 | -0.673573 |
| F | -2.503305 | -5.693885 | -0.934438 |
| C | -2.552603 | -3.865681 | 0.568165  |
| F | -3.135589 | -4.626553 | 1.502374  |
| C | -2.261250 | -2.526972 | 0.817671  |
| C | -2.776260 | 0.766856  | 0.080768  |
| C | -3.487188 | 1.328070  | 1.146462  |
| F | -3.048694 | 1.199725  | 2.413832  |
| C | -4.676300 | 2.037988  | 0.981131  |
| F | -5.314173 | 2.552758  | 2.040306  |
| C | -5.203583 | 2.209623  | -0.294650 |
| F | -6.339345 | 2.891703  | -0.469495 |
| C | -4.535126 | 1.667357  | -1.389301 |
| F | -5.028789 | 1.829115  | -2.623678 |
| C | -3.356420 | 0.959870  | -1.177915 |
| F | -2.743849 | 0.457887  | -2.272277 |
| F | -2.612706 | -2.045819 | 2.029168  |
| B | -1.422822 | -0.117932 | 0.256610  |
| P | 1.753989  | 0.309978  | -0.011093 |
| C | -0.544269 | 0.212452  | 1.574998  |
| H | -1.056266 | -0.259863 | 2.418785  |
| H | -0.564929 | 1.286197  | 1.782393  |
| C | 0.918761  | -0.283932 | 1.566854  |
| H | 0.912097  | -1.356596 | 1.327089  |
| C | 1.548040  | -0.265958 | 2.959787  |
| H | -0.061206 | 0.194132  | -0.733567 |

|   |           |           |           |
|---|-----------|-----------|-----------|
| H | -0.864640 | 0.394999  | -0.930939 |
| F | 2.896876  | -0.354733 | 2.934943  |
| F | 1.233099  | 0.823088  | 3.692778  |
| F | 1.097643  | -1.335524 | 3.660040  |

## E<sub>2</sub>

E= -2602.936 4464au

|   |           |           |           |
|---|-----------|-----------|-----------|
| C | 1.806814  | 2.709879  | 0.855350  |
| C | 1.958463  | 1.343942  | 1.193536  |
| C | 2.132565  | 0.955188  | 2.550805  |
| C | 2.151305  | 1.946651  | 3.532515  |
| C | 1.996489  | 3.301116  | 3.227561  |
| C | 1.835690  | 3.653356  | 1.887733  |
| P | 1.924100  | -0.034536 | -0.011557 |
| C | 2.268868  | -0.484251 | 3.000201  |
| C | 1.978800  | 4.345656  | 4.315838  |
| C | 1.581156  | 3.246023  | -0.541503 |
| C | 0.840580  | 0.169649  | -1.543357 |
| C | -0.367792 | -0.785577 | -1.416253 |
| B | -1.343932 | -0.312779 | -0.165733 |
| C | -2.351814 | 0.893158  | -0.647998 |
| C | -2.291764 | 2.200185  | -0.164053 |
| C | -3.160007 | 3.217474  | -0.560596 |
| C | -4.158206 | 2.939482  | -1.487386 |
| C | -4.262329 | 1.652116  | -2.008141 |
| C | -3.367576 | 0.672929  | -1.583663 |
| F | -1.334714 | 2.564190  | 0.726968  |
| F | -3.513371 | -0.552609 | -2.134271 |
| F | -5.216466 | 1.374361  | -2.910696 |
| F | -5.003487 | 3.901897  | -1.883959 |
| F | -3.037060 | 4.460809  | -0.062458 |
| C | -2.191563 | -1.539414 | 0.512948  |
| C | -2.628877 | -1.439147 | 1.837512  |
| C | -3.353350 | -2.431561 | 2.494365  |
| C | -3.680869 | -3.599635 | 1.812410  |
| C | -3.275364 | -3.749893 | 0.490691  |
| C | -2.553203 | -2.727767 | -0.124758 |
| F | -2.347033 | -0.331547 | 2.558756  |
| F | -3.735648 | -2.276556 | 3.773995  |
| F | -4.375641 | -4.570632 | 2.424205  |
| F | -3.582395 | -4.875133 | -0.176982 |
| F | -2.192688 | -2.954503 | -1.409470 |
| C | 3.591834  | -0.769248 | -0.302986 |

|   |           |           |           |
|---|-----------|-----------|-----------|
| C | 4.764350  | 0.018474  | -0.436698 |
| C | 5.993760  | -0.632137 | -0.580484 |
| C | 6.112006  | -2.022328 | -0.600685 |
| C | 4.942572  | -2.776199 | -0.487850 |
| C | 3.682624  | -2.189403 | -0.343576 |
| C | 4.778130  | 1.530009  | -0.449290 |
| C | 7.459294  | -2.689573 | -0.726570 |
| C | 2.490727  | -3.120683 | -0.261219 |
| H | -0.895470 | -0.763198 | -2.375852 |
| H | 0.472785  | 1.197036  | -1.530822 |
| H | 2.284875  | 1.647389  | 4.569153  |
| H | 1.719268  | 4.702502  | 1.627302  |
| H | 5.006331  | -3.860952 | -0.522553 |
| H | 6.888736  | -0.024312 | -0.687795 |
| H | 2.553905  | -0.522885 | 4.054731  |
| H | 1.315050  | -1.020194 | 2.904759  |
| H | 3.028701  | -1.037426 | 2.436854  |
| H | 2.083915  | 2.680594  | -1.327201 |
| H | 0.507432  | 3.262044  | -0.759262 |
| H | 1.937296  | 4.278320  | -0.607182 |
| H | 0.959392  | 4.485978  | 4.698266  |
| H | 2.607738  | 4.053974  | 5.163295  |
| H | 2.325461  | 5.316286  | 3.947189  |
| H | 2.816284  | -4.155481 | -0.394239 |
| H | 1.976956  | -3.070058 | 0.707020  |
| H | 1.754052  | -2.909553 | -1.041316 |
| H | 7.384957  | -3.645585 | -1.254812 |
| H | 8.172213  | -2.055417 | -1.262940 |
| H | 7.885926  | -2.896748 | 0.263821  |
| H | 4.473769  | 1.957327  | 0.510619  |
| H | 5.786493  | 1.891683  | -0.668188 |
| H | 4.116348  | 1.931643  | -1.220638 |
| H | -0.009488 | -1.813898 | -1.301614 |
| H | 1.251631  | -1.055075 | 0.666614  |
| H | -0.629557 | 0.144422  | 0.715143  |
| C | 1.630365  | 0.018816  | -2.836356 |
| F | 2.694425  | 0.872835  | -2.887529 |
| F | 2.119182  | -1.226219 | -3.008498 |
| F | 0.853906  | 0.304198  | -3.894126 |

### E<sub>3</sub>

E= -2791.5217325au

|   |          |          |          |
|---|----------|----------|----------|
| C | 1.594852 | 2.728430 | 0.468317 |
|---|----------|----------|----------|

|   |           |           |           |
|---|-----------|-----------|-----------|
| C | 1.711193  | 1.409762  | 0.974455  |
| C | 1.440722  | 1.138028  | 2.344514  |
| C | 1.003712  | 2.185195  | 3.155720  |
| C | 0.825780  | 3.483274  | 2.669333  |
| C | 1.161109  | 3.733955  | 1.338191  |
| P | 2.011217  | -0.054679 | -0.079029 |
| C | -0.544389 | -4.478096 | 2.658071  |
| O | -1.441870 | -5.215571 | 2.550292  |
| C | 1.565913  | -0.236077 | 2.965727  |
| C | 0.244642  | 4.566539  | 3.542409  |
| C | 1.893099  | 3.156640  | -0.955341 |
| C | 1.083743  | 0.066338  | -1.714773 |
| C | -0.237193 | -0.733106 | -1.628465 |
| B | -1.236599 | -0.316397 | -0.378341 |
| O | 0.380452  | -3.767491 | 2.777107  |
| C | -1.716859 | 1.258439  | -0.321858 |
| C | -2.159502 | 1.787947  | 0.897004  |
| C | -2.567137 | 3.107968  | 1.069262  |
| C | -2.559115 | 3.976894  | -0.017561 |
| C | -2.136930 | 3.503059  | -1.254132 |
| C | -1.735434 | 2.172251  | -1.374875 |
| F | -2.186919 | 1.011507  | 2.000457  |
| F | -1.290646 | 1.812268  | -2.608019 |
| F | -2.096333 | 4.332775  | -2.311196 |
| F | -2.935342 | 5.255930  | 0.131357  |
| F | -2.937895 | 3.565889  | 2.281815  |
| C | -2.544229 | -1.299701 | -0.381063 |
| C | -2.804734 | -2.221229 | 0.632160  |
| C | -3.913634 | -3.065635 | 0.647828  |
| C | -4.830236 | -3.001368 | -0.396863 |
| C | -4.619714 | -2.097622 | -1.435341 |
| C | -3.495021 | -1.276671 | -1.403475 |
| F | -1.952908 | -2.345604 | 1.683960  |
| F | -4.103793 | -3.936124 | 1.652986  |
| F | -5.904098 | -3.804294 | -0.406232 |
| F | -5.498095 | -2.031370 | -2.448855 |
| F | -3.340301 | -0.419858 | -2.439515 |
| C | 3.719282  | -0.741996 | -0.099698 |
| C | 4.888913  | 0.058865  | -0.122627 |
| C | 6.133728  | -0.572240 | -0.040502 |
| C | 6.268721  | -1.958487 | 0.043006  |
| C | 5.103557  | -2.727740 | 0.044793  |
| C | 3.828671  | -2.160607 | -0.027255 |



|   |           |           |           |
|---|-----------|-----------|-----------|
| C | 4.883023  | 1.562135  | -0.264804 |
| C | 7.629218  | -2.608453 | 0.097293  |
| C | 2.646708  | -3.109685 | -0.024485 |
| H | -0.729142 | -0.598007 | -2.596823 |
| H | 0.829477  | 1.116327  | -1.849600 |
| H | 0.777298  | 1.973736  | 4.197649  |
| H | 1.063936  | 4.744917  | 0.948964  |
| H | 5.184306  | -3.810445 | 0.102633  |
| H | 7.027335  | 0.047031  | -0.049175 |
| H | 1.565841  | -0.154633 | 4.056032  |
| H | 0.717755  | -0.876563 | 2.689840  |
| H | 2.490915  | -0.748811 | 2.678746  |
| H | 2.510062  | 2.455054  | -1.515426 |
| H | 0.965655  | 3.312565  | -1.519977 |
| H | 2.422644  | 4.115272  | -0.947723 |
| H | 0.593412  | 5.559811  | 3.242098  |
| H | -0.849542 | 4.558412  | 3.456732  |
| H | 0.495310  | 4.414389  | 4.597150  |
| H | 3.002309  | -4.139106 | -0.120389 |
| H | 2.065133  | -3.059559 | 0.904213  |
| H | 1.966660  | -2.925265 | -0.860486 |
| H | 8.380699  | -1.931776 | 0.516033  |
| H | 7.613478  | -3.521268 | 0.701777  |
| H | 7.965840  | -2.890454 | -0.909052 |
| H | 4.198850  | 2.049818  | 0.433466  |
| H | 5.884179  | 1.963032  | -0.084892 |
| H | 4.593696  | 1.852334  | -1.280627 |
| H | -0.000197 | -1.802812 | -1.544162 |
| H | 1.292239  | -1.060264 | 0.571198  |
| H | -0.648365 | -0.512920 | 0.667610  |
| C | 1.964155  | -0.292549 | -2.902850 |
| F | 1.312981  | -0.087152 | -4.057382 |
| F | 2.371514  | -1.580835 | -2.886769 |
| F | 3.091460  | 0.476766  | -2.939336 |

**TS<sub>34E</sub>**

E= -2791.4816022au

|   |          |          |           |
|---|----------|----------|-----------|
| C | 2.207427 | 2.463618 | -0.311013 |
| C | 2.342643 | 1.371228 | 0.585649  |
| C | 2.692995 | 1.623066 | 1.943145  |
| C | 2.817873 | 2.945220 | 2.378467  |
| C | 2.603791 | 4.033462 | 1.533338  |
| C | 2.330690 | 3.763433 | 0.192705  |

|   |           |           |           |
|---|-----------|-----------|-----------|
| P | 1.962623  | -0.407862 | 0.235992  |
| C | -0.943219 | -0.993981 | 2.422798  |
| O | -1.895037 | -1.178665 | 3.144651  |
| C | 2.963546  | 0.528564  | 2.955536  |
| C | 2.657842  | 5.451698  | 2.043561  |
| C | 1.958512  | 2.365149  | -1.803886 |
| C | 0.809583  | -0.611539 | -1.279322 |
| C | -0.541099 | -1.311102 | -0.961612 |
| B | -1.718626 | -0.469641 | -0.262891 |
| O | 0.305767  | -1.196070 | 2.562183  |
| C | -1.749081 | 1.117304  | -0.510539 |
| C | -1.264495 | 2.123062  | 0.326586  |
| C | -1.344942 | 3.476959  | 0.004970  |
| C | -1.927947 | 3.865125  | -1.198531 |
| C | -2.421911 | 2.895318  | -2.068215 |
| C | -2.322187 | 1.554063  | -1.707700 |
| F | -0.680420 | 1.814668  | 1.499127  |
| F | -2.802732 | 0.637360  | -2.575361 |
| F | -2.980660 | 3.256838  | -3.229165 |
| F | -2.005741 | 5.159975  | -1.521190 |
| F | -0.855427 | 4.406988  | 0.835861  |
| C | -3.095470 | -1.170025 | 0.079532  |
| C | -4.027353 | -0.544206 | 0.923830  |
| C | -5.243278 | -1.118476 | 1.279505  |
| C | -5.571898 | -2.377945 | 0.786631  |
| C | -4.680974 | -3.044359 | -0.050757 |
| C | -3.470681 | -2.441307 | -0.377111 |
| F | -3.763388 | 0.666424  | 1.438332  |
| F | -6.093589 | -0.476342 | 2.087654  |
| F | -6.735252 | -2.944275 | 1.112817  |
| F | -4.994703 | -4.253852 | -0.532440 |
| F | -2.658563 | -3.144265 | -1.192532 |
| C | 3.478710  | -1.468076 | 0.111910  |
| C | 4.746993  | -0.978790 | -0.296722 |
| C | 5.845240  | -1.845981 | -0.254472 |
| C | 5.744030  | -3.170951 | 0.167884  |
| C | 4.483342  | -3.636773 | 0.544760  |
| C | 3.348144  | -2.822611 | 0.528843  |
| C | 5.011338  | 0.428072  | -0.785372 |
| C | 6.955444  | -4.068969 | 0.229172  |
| C | 2.032010  | -3.456801 | 0.923501  |
| H | -0.971476 | -1.582923 | -1.936827 |
| H | 0.590235  | 0.398387  | -1.621682 |

|   |           |           |           |   |           |           |           |
|---|-----------|-----------|-----------|---|-----------|-----------|-----------|
| H | 3.080368  | 3.123705  | 3.418377  | C | -2.068685 | -3.113918 | -1.046733 |
| H | 2.212574  | 4.595165  | -0.498580 | C | -0.817026 | -0.123766 | -1.529478 |
| H | 4.372342  | -4.671631 | 0.859772  | C | 0.439810  | 0.789050  | -1.514051 |
| H | 6.813494  | -1.465689 | -0.571287 | B | 1.739804  | 0.350325  | -0.731710 |
| H | 3.395956  | 0.961219  | 3.862145  | O | 0.590150  | 0.584936  | 2.423161  |
| H | 2.047828  | 0.001981  | 3.245306  | C | 2.245592  | -1.148902 | -0.873344 |
| H | 3.671902  | -0.218644 | 2.580785  | C | 1.689694  | -2.246155 | -0.224809 |
| H | 2.384601  | 1.472843  | -2.261196 | C | 2.149828  | -3.547506 | -0.398454 |
| H | 0.887440  | 2.391554  | -2.044274 | C | 3.221996  | -3.777424 | -1.258193 |
| H | 2.406540  | 3.229229  | -2.304043 | C | 3.813290  | -2.707782 | -1.928373 |
| H | 1.642220  | 5.843450  | 2.184729  | C | 3.320055  | -1.422760 | -1.720810 |
| H | 3.175182  | 5.515122  | 3.005789  | F | 0.649425  | -2.061781 | 0.622439  |
| H | 3.165862  | 6.115812  | 1.335474  | F | 3.900645  | -0.407082 | -2.391735 |
| H | 2.194944  | -4.490300 | 1.241455  | F | 4.836756  | -2.924129 | -2.760109 |
| H | 1.528796  | -2.935534 | 1.743272  | F | 3.675271  | -5.018290 | -1.445683 |
| H | 1.343967  | -3.488910 | 0.071804  | F | 1.566989  | -4.569274 | 0.237518  |
| H | 6.711672  | -5.091002 | -0.080378 | C | 2.662317  | 1.383617  | -0.006465 |
| H | 7.761436  | -3.700108 | -0.412961 | C | 3.529214  | 0.992994  | 1.032070  |
| H | 7.349448  | -4.126112 | 1.252492  | C | 4.331845  | 1.888466  | 1.730417  |
| H | 4.922338  | 1.168299  | 0.015288  | C | 4.303967  | 3.238129  | 1.386938  |
| H | 6.025994  | 0.494784  | -1.188309 | C | 3.469898  | 3.678097  | 0.360797  |
| H | 4.323776  | 0.720424  | -1.581772 | C | 2.669356  | 2.757667  | -0.304139 |
| H | -0.379280 | -2.266763 | -0.456729 | F | 3.588733  | -0.286703 | 1.421040  |
| H | 1.061531  | -0.854407 | 1.462654  | F | 5.127820  | 1.470940  | 2.716358  |
| H | -1.185235 | -0.556394 | 1.347112  | F | 5.074050  | 4.108065  | 2.036384  |
| C | 1.487280  | -1.302071 | -2.460819 | F | 3.451571  | 4.972291  | 0.024589  |
| F | 1.716834  | -2.611177 | -2.235233 | F | 1.900047  | 3.246460  | -1.294970 |
| F | 2.679183  | -0.736863 | -2.781611 | C | -3.040534 | 1.450583  | -0.211252 |
| F | 0.714025  | -1.216347 | -3.564704 | C | -4.362302 | 1.181312  | -0.665288 |

#### E4

E= -2791.5067906au

|   |           |           |          |   |           |           |           |
|---|-----------|-----------|----------|---|-----------|-----------|-----------|
| C | -2.665127 | -2.689926 | 0.278598 | C | -2.667049 | 2.799573  | 0.043101  |
| C | -2.629116 | -1.373436 | 0.806480 | C | -4.946228 | -0.202379 | -0.859345 |
| C | -3.196091 | -1.146588 | 2.096900 | C | -5.816082 | 4.712887  | -1.011870 |
| C | -3.803796 | -2.202281 | 2.784154 | C | -1.321927 | 3.237666  | 0.593960  |
| C | -3.861290 | -3.496119 | 2.267883 | H | 0.829590  | 0.831471  | -2.549630 |
| C | -3.282677 | -3.707750 | 1.018249 | H | -0.518036 | -1.170537 | -1.568754 |
| P | -1.746267 | 0.141110  | 0.142366 | H | -4.239298 | -1.999994 | 3.760523  |
| C | 0.754424  | -0.448536 | 3.274779 | H | -3.307768 | -4.707826 | 0.590788  |
| O | 1.611493  | -0.464724 | 4.117874 | H | -3.277972 | 4.853415  | -0.015639 |
| C | -3.195587 | 0.202527  | 2.790457 | H | -6.236198 | 2.030742  | -1.256806 |
| C | -4.492575 | -4.625459 | 3.046029 | H | -3.565328 | 0.096682  | 3.814455  |

|   |           |           |           |
|---|-----------|-----------|-----------|
| H | -2.192847 | 0.641853  | 2.849390  |
| H | -3.830702 | 0.934360  | 2.280750  |
| H | -2.331870 | -2.447232 | -1.867844 |
| H | -0.975865 | -3.175309 | -0.986522 |
| H | -2.423416 | -4.113798 | -1.312906 |
| H | -4.843696 | -5.422486 | 2.382374  |
| H | -3.773796 | -5.074976 | 3.744168  |
| H | -5.344663 | -4.276447 | 3.639390  |
| H | -1.436553 | 4.178314  | 1.142270  |
| H | -0.874822 | 2.510866  | 1.275018  |
| H | -0.593420 | 3.429548  | -0.203437 |
| H | -6.855930 | 4.424070  | -0.824659 |
| H | -5.594349 | 5.600435  | -0.410076 |
| H | -5.746365 | 5.008393  | -2.067307 |
| H | -5.251914 | -0.640243 | 0.098110  |
| H | -5.836544 | -0.142747 | -1.493190 |
| H | -4.252390 | -0.898754 | -1.323548 |
| H | 0.140713  | 1.810595  | -1.290500 |
| H | -0.145273 | 0.405329  | 1.779740  |
| H | 0.025240  | -1.264622 | 3.123333  |
| C | -1.572564 | 0.146710  | -2.828614 |
| F | -2.724841 | -0.555234 | -2.946706 |
| F | -1.880637 | 1.447133  | -2.987303 |
| F | -0.808174 | -0.211440 | -3.893858 |

## F

E= -2304.0372144au

|   |           |          |           |
|---|-----------|----------|-----------|
| C | -2.087484 | 2.552086 | 0.032208  |
| C | -3.422731 | 2.887581 | 0.381547  |
| C | -3.921409 | 4.156436 | 0.065584  |
| H | -4.946330 | 4.395616 | 0.342988  |
| C | -3.153250 | 5.120965 | -0.588191 |
| C | -1.844651 | 4.781017 | -0.927665 |
| H | -1.222923 | 5.514608 | -1.436794 |
| C | -1.297616 | 3.523620 | -0.639336 |
| C | -4.362265 | 1.941911 | 1.095143  |
| H | -4.022998 | 1.719323 | 2.113563  |
| H | -4.460523 | 0.988389 | 0.569945  |
| H | -5.358730 | 2.386357 | 1.179248  |
| C | -3.730138 | 6.471780 | -0.939777 |
| H | -2.946399 | 7.230996 | -1.032016 |
| H | -4.446016 | 6.811419 | -0.183193 |
| H | -4.264920 | 6.436584 | -1.898531 |

|   |           |           |           |
|---|-----------|-----------|-----------|
| C | 0.133888  | 3.282086  | -1.078228 |
| H | 0.217283  | 2.421226  | -1.748665 |
| H | 0.805113  | 3.092417  | -0.237202 |
| H | 0.513543  | 4.159436  | -1.611923 |
| C | -2.413330 | -0.450480 | -0.187202 |
| C | -3.147417 | -1.391086 | 0.587035  |
| C | -3.783023 | -2.464564 | -0.054875 |
| H | -4.336043 | -3.174316 | 0.557583  |
| C | -3.732748 | -2.663076 | -1.433330 |
| C | -3.041985 | -1.715528 | -2.188625 |
| H | -2.996415 | -1.828336 | -3.269717 |
| C | -2.381654 | -0.632098 | -1.601606 |
| C | -3.308288 | -1.360707 | 2.095700  |
| H | -4.196377 | -1.933206 | 2.381498  |
| H | -3.427041 | -0.353956 | 2.494607  |
| H | -2.458231 | -1.827503 | 2.609184  |
| C | -4.364230 | -3.875348 | -2.073559 |
| H | -3.671138 | -4.726705 | -2.046054 |
| H | -4.618342 | -3.691630 | -3.122723 |
| H | -5.276092 | -4.180272 | -1.548537 |
| C | -1.623124 | 0.295420  | -2.527691 |
| H | -1.757656 | -0.013991 | -3.568665 |
| H | -0.548635 | 0.279252  | -2.310695 |
| H | -1.959403 | 1.334139  | -2.442616 |
| C | 3.072175  | 0.186092  | 0.550100  |
| C | 3.468853  | 1.530106  | 0.496884  |
| F | 2.686637  | 2.492291  | 1.025715  |
| C | 4.646045  | 1.965357  | -0.103561 |
| F | 4.955808  | 3.266585  | -0.141686 |
| C | 5.512688  | 1.027707  | -0.658455 |
| F | 6.652982  | 1.421001  | -1.227359 |
| C | 5.182207  | -0.324067 | -0.612135 |
| F | 6.017309  | -1.231790 | -1.130508 |
| C | 3.984316  | -0.714971 | -0.022025 |
| C | 0.992104  | -1.566988 | 0.785172  |
| C | 0.300020  | -2.465377 | 1.612436  |
| F | 0.239049  | -2.283455 | 2.948747  |
| C | -0.379787 | -3.584794 | 1.139215  |
| F | -1.037935 | -4.384152 | 1.988774  |
| C | -0.407849 | -3.845292 | -0.225220 |
| F | -1.079971 | -4.896458 | -0.699080 |
| C | 0.253989  | -2.983946 | -1.096543 |
| F | 0.209506  | -3.207494 | -2.414596 |

|   |           |           |           |
|---|-----------|-----------|-----------|
| C | 0.933983  | -1.887901 | -0.583983 |
| F | 1.509856  | -1.078316 | -1.491738 |
| F | 3.744209  | -2.037592 | 0.003948  |
| C | -1.138010 | 0.922116  | 2.296825  |
| H | -1.237242 | -0.090854 | 2.686037  |
| H | -1.938313 | 1.525149  | 2.736531  |
| C | 0.232433  | 1.481300  | 2.722722  |
| H | 0.150916  | 1.836822  | 3.758601  |
| H | 0.490983  | 2.359672  | 2.122065  |
| C | 1.399577  | 0.453024  | 2.675196  |
| H | 2.292721  | 0.977338  | 3.035307  |
| H | 1.176982  | -0.319547 | 3.419874  |
| P | -1.255493 | 0.906445  | 0.413533  |
| B | 1.753967  | -0.276998 | 1.304958  |

**F<sub>1</sub>**

**E= -2305.2153873au**

|   |           |           |           |
|---|-----------|-----------|-----------|
| C | -1.694118 | 3.371602  | 0.635538  |
| C | -1.622447 | 2.147518  | -0.085988 |
| C | -1.534120 | 2.212793  | -1.505613 |
| C | -1.558271 | 3.452615  | -2.154801 |
| C | -1.640165 | 4.656029  | -1.458845 |
| C | -1.704795 | 4.583388  | -0.067591 |
| P | -1.482475 | 0.391699  | 0.578835  |
| C | -1.400694 | 0.985123  | -2.382993 |
| C | -1.634174 | 5.986548  | -2.173077 |
| C | -1.750333 | 3.496084  | 2.145099  |
| B | 1.536602  | -0.742046 | 1.269009  |
| C | 2.497194  | 0.400676  | 0.729912  |
| C | 2.221462  | 1.760642  | 0.927121  |
| C | 3.061973  | 2.786976  | 0.509554  |
| C | 4.261824  | 2.470086  | -0.120484 |
| C | 4.597440  | 1.134321  | -0.324830 |
| C | 3.720717  | 0.137858  | 0.094128  |
| F | 1.079041  | 2.138609  | 1.531326  |
| F | 4.122162  | -1.128930 | -0.115779 |
| F | 5.756578  | 0.821811  | -0.915447 |
| F | 5.084396  | 3.440045  | -0.522522 |
| F | 2.730539  | 4.069442  | 0.709756  |
| C | 1.472914  | -2.112523 | 0.476498  |
| C | 1.532179  | -2.166286 | -0.924870 |
| C | 1.527713  | -3.348721 | -1.653823 |
| C | 1.469425  | -4.565224 | -0.977040 |

|   |           |           |           |
|---|-----------|-----------|-----------|
| C | 1.405747  | -4.573690 | 0.412461  |
| C | 1.396640  | -3.364586 | 1.105622  |
| F | 1.563452  | -1.027365 | -1.642072 |
| F | 1.570184  | -3.330993 | -2.991143 |
| F | 1.467710  | -5.712767 | -1.656955 |
| F | 1.350931  | -5.737548 | 1.070661  |
| F | 1.336786  | -3.463504 | 2.447400  |
| C | -3.149090 | -0.409591 | 0.180010  |
| C | -4.408859 | 0.168223  | 0.495528  |
| C | -5.584973 | -0.515878 | 0.165632  |
| C | -5.578692 | -1.758417 | -0.469418 |
| C | -4.338574 | -2.320831 | -0.765203 |
| C | -3.133311 | -1.676515 | -0.457789 |
| C | -4.572021 | 1.499195  | 1.193176  |
| C | -6.866893 | -2.454479 | -0.839183 |
| C | -1.855902 | -2.401181 | -0.821438 |
| H | -1.502486 | 3.470251  | -3.241281 |
| H | -1.768834 | -5.507747 | 0.503299  |
| H | -4.299819 | -3.294016 | -1.250353 |
| H | -6.538978 | -0.057360 | 0.418946  |
| H | -1.291985 | 1.279946  | -3.431290 |
| H | -0.522145 | 0.388673  | -2.111222 |
| H | -2.275127 | 0.328536  | -2.315158 |
| H | -2.487921 | 2.834091  | 2.601920  |
| H | -0.778363 | 3.282266  | 2.602791  |
| H | -2.015753 | 4.520486  | 2.423716  |
| H | -1.874798 | 5.871894  | -3.235001 |
| H | -2.360104 | 6.680666  | -1.733889 |
| H | -0.649497 | 6.468636  | -2.109156 |
| H | -2.083475 | -3.314213 | -1.381075 |
| H | -1.194172 | -1.784991 | -1.435714 |
| H | -1.287081 | -2.691650 | 0.067871  |
| H | -6.723151 | -3.534964 | -0.943752 |
| H | -7.644689 | -2.285898 | -0.086129 |
| H | -7.257636 | -2.082658 | -1.795990 |
| H | -4.150543 | 2.322922  | 0.610648  |
| H | -5.631879 | 1.712210  | 1.362336  |
| H | -4.079142 | 1.509457  | 2.170827  |
| H | 3.504169  | 6.299088  | -1.595058 |
| H | 3.330178  | 5.797432  | -1.076119 |
| C | -0.581739 | -0.875169 | 2.930487  |
| C | -1.465149 | 0.302301  | 2.465634  |
| C | 0.929132  | -0.607305 | 2.726532  |

|   |           |           |          |
|---|-----------|-----------|----------|
| H | -2.482699 | 0.183337  | 2.850767 |
| H | -1.056135 | 1.220200  | 2.884658 |
| H | -0.773818 | -1.033870 | 4.000150 |
| H | -0.879416 | -1.804527 | 2.428660 |
| H | 1.172897  | 0.364003  | 3.169116 |
| H | 1.480236  | -1.351647 | 3.321213 |

**TS<sub>F12</sub>**

**E= -2305.1795068au**

|   |           |           |           |
|---|-----------|-----------|-----------|
| C | -1.946326 | -3.403846 | 0.188499  |
| C | -2.154807 | -2.058138 | 0.589298  |
| C | -2.604656 | -1.813439 | 1.918065  |
| C | -2.886869 | -2.886543 | 2.769306  |
| C | -2.715188 | -4.213065 | 2.376570  |
| C | -2.238606 | -4.439812 | 1.086299  |
| P | -1.751238 | -0.491694 | -0.363023 |
| C | -2.787669 | -0.420470 | 2.485242  |
| C | -2.995760 | -5.355926 | 3.323033  |
| C | -1.400779 | -3.833680 | -1.158590 |
| B | 1.782839  | 0.469686  | -0.987796 |
| C | 3.106703  | -0.404078 | -0.783752 |
| C | 3.136610  | -1.779979 | -1.047662 |
| C | 4.280723  | -2.562351 | -0.930747 |
| C | 5.479101  | -1.961946 | -0.552461 |
| C | 5.508645  | -0.595079 | -0.292685 |
| C | 4.336946  | 0.149053  | -0.407301 |
| F | 2.006978  | -2.426001 | -1.411381 |
| F | 4.443241  | 1.468626  | -0.160492 |
| F | 6.659136  | -0.008547 | 0.059801  |
| F | 6.591659  | -2.692254 | -0.442924 |
| F | 4.240898  | -3.877548 | -1.179538 |
| C | 1.565255  | 1.735046  | -0.047581 |
| C | 1.862248  | 1.696523  | 1.324252  |
| C | 1.711619  | 2.785407  | 2.175467  |
| C | 1.262605  | 3.999046  | 1.658575  |
| C | 0.965730  | 4.095941  | 0.303973  |
| C | 1.114809  | 2.975872  | -0.511422 |
| F | 2.308552  | 0.559774  | 1.883916  |
| F | 1.999951  | 2.682946  | 3.478531  |
| F | 1.115927  | 5.057344  | 2.458730  |
| F | 0.522334  | 5.252991  | -0.204595 |
| F | 0.789231  | 3.154190  | -1.808388 |
| C | -3.408307 | 0.357640  | -0.674186 |

|   |           |           |           |
|---|-----------|-----------|-----------|
| C | -4.552645 | -0.320111 | -1.169386 |
| C | -5.733928 | 0.399619  | -1.391460 |
| C | -5.838519 | 1.766624  | -1.136272 |
| C | -4.708306 | 2.418910  | -0.642336 |
| C | -3.501914 | 1.749175  | -0.407970 |
| C | -4.593610 | -1.804119 | -1.462020 |
| C | -7.126396 | 2.517585  | -1.379130 |
| C | -2.346778 | 2.583686  | 0.106914  |
| H | -3.243124 | -2.671342 | 3.774740  |
| H | -2.084543 | -5.465196 | 0.756314  |
| H | -4.760728 | 3.485222  | -0.430273 |
| H | -6.601941 | -0.133619 | -1.773875 |
| H | -3.019601 | -0.474288 | 3.553149  |
| H | -1.878165 | 0.182630  | 2.374020  |
| H | -3.598718 | 0.128433  | 1.994933  |
| H | -1.937749 | -3.387430 | -1.999538 |
| H | -0.340109 | -3.579027 | -1.264901 |
| H | -1.480031 | -4.919884 | -1.262899 |
| H | -3.804407 | -5.110002 | 4.019721  |
| H | -3.277929 | -6.265181 | 2.781573  |
| H | -2.110130 | -5.597884 | 3.925937  |
| H | -2.721752 | 3.491601  | 0.590498  |
| H | -1.725986 | 2.043551  | 0.825323  |
| H | -1.688763 | 2.904883  | -0.709607 |
| H | -6.985125 | 3.327186  | -2.105944 |
| H | -7.909371 | 1.856064  | -1.762804 |
| H | -7.499211 | 2.977977  | -0.455688 |
| H | -4.586758 | -2.398593 | -0.542635 |
| H | -5.502940 | -2.054974 | -2.016902 |
| H | -3.741339 | -2.138476 | -2.059585 |
| H | 0.001923  | -0.490149 | 0.140212  |
| H | 0.825968  | -0.792831 | 0.201308  |
| C | -0.415271 | 0.417690  | -2.663083 |
| C | -1.177700 | -0.816891 | -2.126463 |
| C | 1.108311  | 0.337070  | -2.425015 |
| H | -2.033103 | -1.049723 | -2.765939 |
| H | -0.509034 | -1.676651 | -2.141875 |
| H | -0.584873 | 0.469198  | -3.746461 |
| H | -0.830142 | 1.345914  | -2.257377 |
| H | 1.468322  | -0.577658 | -2.909150 |
| H | 1.580956  | 1.161066  | -2.986712 |

**F<sub>2</sub>**

---

**E= -2305.2136147au**

|   |           |           |           |
|---|-----------|-----------|-----------|
| C | -1.099705 | -3.137996 | 0.694927  |
| C | -1.566022 | -1.804081 | 0.815611  |
| C | -1.861869 | -1.269697 | 2.100090  |
| C | -1.706336 | -2.086704 | 3.222176  |
| C | -1.261253 | -3.405900 | 3.128933  |
| C | -0.970441 | -3.903847 | 1.858876  |
| P | -1.804647 | -0.655695 | -0.603940 |
| C | -2.312767 | 0.155664  | 2.334284  |
| C | -1.068507 | -4.253322 | 4.362208  |
| C | -0.677053 | -3.797998 | -0.598522 |
| B | 1.420507  | 0.265384  | -0.980066 |
| C | 2.991781  | -0.202147 | -0.888667 |
| C | 3.333674  | -1.534039 | -1.133449 |
| C | 4.633366  | -2.030748 | -1.103437 |
| C | 5.683691  | -1.161831 | -0.823452 |
| C | 5.405347  | 0.179814  | -0.586765 |
| C | 4.084407  | 0.626495  | -0.629443 |
| F | 2.364475  | -2.440061 | -1.443569 |
| F | 3.903521  | 1.948033  | -0.403924 |
| F | 6.410585  | 1.032160  | -0.325737 |
| F | 6.947501  | -1.612514 | -0.790691 |
| F | 4.884583  | -3.329678 | -1.346184 |
| C | 1.103974  | 1.591885  | -0.050081 |
| C | 1.396923  | 1.553875  | 1.321571  |
| C | 1.155589  | 2.601420  | 2.206212  |
| C | 0.577986  | 3.777676  | 1.731563  |
| C | 0.257461  | 3.871054  | 0.383784  |
| C | 0.529681  | 2.794485  | -0.463510 |
| F | 1.954075  | 0.446331  | 1.853631  |
| F | 1.469085  | 2.494307  | 3.508063  |
| F | 0.325085  | 4.796164  | 2.566587  |
| F | -0.326733 | 4.984840  | -0.092020 |
| F | 0.155482  | 2.983051  | -1.757478 |
| C | -3.579716 | -0.199788 | -0.828338 |
| C | -4.546186 | -1.216084 | -1.042808 |
| C | -5.879834 | -0.852134 | -1.242478 |
| C | -6.294457 | 0.481558  | -1.244765 |
| C | -5.326569 | 1.465012  | -1.036805 |
| C | -3.974296 | 1.165353  | -0.831147 |
| C | -4.206223 | -2.690382 | -1.063752 |
| C | -7.737791 | 0.847459  | -1.491396 |
| C | -3.034459 | 2.334709  | -0.612653 |

|   |           |           |           |
|---|-----------|-----------|-----------|
| H | -1.934520 | -1.670590 | 4.200308  |
| H | -0.615726 | -4.927016 | 1.762528  |
| H | -5.628954 | 2.509329  | -1.033694 |
| H | -6.615286 | -1.637621 | -1.400312 |
| H | -2.526681 | 0.312104  | 3.394720  |
| H | -1.531466 | 0.874828  | 2.058085  |
| H | -3.220480 | 0.408015  | 1.776549  |
| H | -1.394376 | -3.658623 | -1.411476 |
| H | 0.295463  | -3.413913 | -0.925262 |
| H | -0.567129 | -4.875351 | -0.447175 |
| H | -1.773754 | -3.977858 | 5.153068  |
| H | -1.196757 | -5.317980 | 4.141974  |
| H | -0.056432 | -4.122701 | 4.767085  |
| H | -2.561409 | 2.308513  | 0.375055  |
| H | -2.232436 | 2.393020  | -1.354100 |
| H | -3.591310 | 3.273449  | -0.673164 |
| H | -7.988786 | 1.813207  | -1.041640 |
| H | -7.942946 | 0.924068  | -2.567336 |
| H | -8.417960 | 0.092046  | -1.084258 |
| H | -3.831362 | -3.041131 | -0.096707 |
| H | -5.092437 | -3.280974 | -1.311417 |
| H | -3.444540 | -2.929186 | -1.815434 |
| H | -1.191679 | 0.544380  | -0.214005 |
| H | 0.785425  | -0.646998 | -0.440531 |
| C | -0.486928 | 0.188087  | -2.941565 |
| C | -1.133716 | -1.058636 | -2.284147 |
| C | 1.001160  | 0.338118  | -2.572314 |
| H | -1.984353 | -1.429382 | -2.865563 |
| H | -0.388550 | -1.846566 | -2.201366 |
| H | -0.605441 | 0.055424  | -4.026290 |
| H | -1.053208 | 1.093887  | -2.697820 |
| H | 1.520536  | -0.493874 | -3.070693 |
| H | 1.379321  | 1.248311  | -3.054245 |

**F<sub>3</sub>****E= -2493.7974752au**

|   |           |           |           |
|---|-----------|-----------|-----------|
| C | -1.286384 | -3.188087 | 0.417062  |
| C | -1.692050 | -1.842208 | 0.608457  |
| C | -1.888322 | -1.340830 | 1.924688  |
| C | -1.697384 | -2.199889 | 3.009258  |
| C | -1.316530 | -3.532262 | 2.846539  |
| C | -1.122384 | -3.998104 | 1.546043  |
| P | -1.980190 | -0.641107 | -0.755073 |



B 1. 686573 0. 302771 -0. 864310  
 O -0. 148642 -0. 219996 1. 884293  
 C 2. 959125 -0. 682213 -0. 794259  
 C 2. 802110 -2. 060490 -0. 979466  
 C 3. 853278 -2. 969548 -0. 975774  
 C 5. 151071 -2. 499247 -0. 796403  
 C 5. 367532 -1. 135178 -0. 625212  
 C 4. 282144 -0. 262314 -0. 626198  
 F 1. 562716 -2. 571766 -1. 176389  
 F 4. 570825 1. 046545 -0. 481964  
 F 6. 615472 -0. 672507 -0. 471904  
 F 6. 181422 -3. 350567 -0. 798605  
 F 3. 632462 -4. 278953 -1. 150858  
 C 1. 759685 1. 667340 -0. 022569  
 C 2. 360934 1. 736920 1. 247298  
 C 2. 506396 2. 908871 1. 980751  
 C 2. 064146 4. 113035 1. 440728  
 C 1. 482295 4. 113335 0. 179262  
 C 1. 347431 2. 913004 -0. 514767  
 F 2. 844228 0. 627891 1. 824077  
 F 3. 081117 2. 892528 3. 188179  
 F 2. 196096 5. 251123 2. 125394  
 F 1. 041944 5. 259796 -0. 358530  
 F 0. 763598 3. 029306 -1. 730115  
 C -3. 345421 0. 783271 -0. 671792  
 C -4. 544223 0. 342179 -1. 293768  
 C -5. 558296 1. 273505 -1. 546273  
 C -5. 447635 2. 618823 -1. 194773  
 C -4. 272819 3. 027203 -0. 562649  
 C -3. 220401 2. 145557 -0. 293398  
 C -4. 839572 -1. 096283 -1. 667931  
 C -6. 560219 3. 600397 -1. 474459  
 C -1. 994121 2. 733960 0. 371785  
 H -4. 248439 -2. 526996 3. 414836  
 H -3. 030141 -5. 286825 0. 391563  
 H -4. 163045 4. 068601 -0. 267419  
 H -6. 470202 0. 927285 -2. 027375  
 H -3. 795872 -0. 384599 3. 374719  
 H -2. 301044 0. 098554 2. 579651  
 H -3. 869016 0. 427866 1. 811060  
 H -2. 254858 -3. 192734 -2. 171357  
 H -0. 774281 -3. 500367 -1. 244725  
 H -1. 990588 -4. 756476 -1. 414794

H -3. 595034 -5. 499761 3. 583356  
 H -5. 229145 -4. 894613 3. 302272  
 H -4. 505719 -6. 059283 2. 175942  
 H -2. 265786 3. 641650 0. 919327  
 H -1. 507203 2. 057552 1. 077457  
 H -1. 249596 3. 024710 -0. 375964  
 H -6. 954752 4. 027874 -0. 544339  
 H -6. 205349 4. 437994 -2. 087028  
 H -7. 391508 3. 124762 -2. 003590  
 H -5. 046091 -1. 705353 -0. 781544  
 H -5. 720804 -1. 139191 -2. 314671  
 H -4. 022614 -1. 587344 -2. 202868  
 H -0. 914122 0. 036860 0. 768523  
 H 0. 911004 -0. 710457 0. 256406  
 C -0. 472955 0. 478689 -2. 604618  
 C -1. 299849 -0. 709102 -2. 083989  
 C 1. 015387 0. 259240 -2. 318878  
 H -2. 168807 -0. 895010 -2. 719408  
 H -0. 681974 -1. 604344 -2. 084436  
 H -0. 623010 0. 538452 -3. 690137  
 H -0. 834577 1. 429261 -2. 204343  
 H 1. 302694 -0. 676243 -2. 812064  
 H 1. 587010 1. 042843 -2. 842825

**F<sub>4</sub>**

**E= -2493.7929935au**

C -3. 096792 -2. 944154 -0. 505405  
 C -2. 957067 -1. 718761 0. 199155  
 C -3. 534744 -1. 620316 1. 497721  
 C -4. 272216 -2. 690866 2. 015650  
 C -4. 444923 -3. 885200 1. 319079  
 C -3. 838691 -3. 985319 0. 067446  
 P -1. 944993 -0. 219414 -0. 312708  
 C 0. 663483 -1. 374350 2. 412298  
 O 1. 393195 -1. 628864 3. 334145  
 C -3. 388151 -0. 401049 2. 385326  
 C -5. 218873 -5. 038454 1. 911644  
 C -2. 476223 -3. 243699 -1. 855621  
 B 2. 013751 0. 354749 -1. 234655  
 O 0. 304462 -0. 120246 2. 078570  
 C 2. 827113 -0. 972629 -0. 950403  
 C 2. 197703 -2. 214207 -0. 840109  
 C 2. 885393 -3. 409123 -0. 659021



|   |           |           |           |
|---|-----------|-----------|-----------|
| C | 4.277413  | -3.383679 | -0.604110 |
| C | 4.953653  | -2.169798 | -0.716349 |
| C | 4.223310  | -0.996464 | -0.874773 |
| F | 0.844267  | -2.280896 | -0.862951 |
| F | 4.915048  | 0.152499  | -0.982862 |
| F | 6.289514  | -2.145298 | -0.670359 |
| F | 4.960376  | -4.517567 | -0.443150 |
| F | 2.229931  | -4.568463 | -0.538371 |
| C | 2.281129  | 1.633451  | -0.363490 |
| C | 2.841445  | 1.564478  | 0.928868  |
| C | 3.081247  | 2.684584  | 1.718331  |
| C | 2.781060  | 3.949468  | 1.219308  |
| C | 2.242519  | 4.079762  | -0.058564 |
| C | 2.000427  | 2.938007  | -0.813607 |
| F | 3.168245  | 0.387898  | 1.470683  |
| F | 3.604313  | 2.561487  | 2.939876  |
| F | 3.011225  | 5.032510  | 1.958794  |
| F | 1.964818  | 5.294667  | -0.545237 |
| F | 1.493745  | 3.148459  | -2.042037 |
| C | -3.158640 | 1.208220  | -0.424827 |
| C | -4.405303 | 1.127807  | -1.098473 |
| C | -5.212393 | 2.268905  | -1.182370 |
| C | -4.841198 | 3.492538  | -0.623236 |
| C | -3.622005 | 3.551351  | 0.052101  |
| C | -2.777588 | 2.440511  | 0.167954  |
| C | -4.955567 | -0.144368 | -1.708411 |
| C | -5.718521 | 4.713838  | -0.762907 |
| C | -1.498357 | 2.623922  | 0.961136  |
| H | -4.715595 | -2.583519 | 3.003382  |
| H | -3.943075 | -4.911618 | -0.493933 |
| H | -3.315086 | 4.489270  | 0.510019  |
| H | -6.165859 | 2.192873  | -1.701564 |
| H | -3.816872 | -0.600449 | 3.371799  |
| H | -2.336072 | -0.132936 | 2.537359  |
| H | -3.891651 | 0.480074  | 1.974777  |
| H | -2.771609 | -2.530044 | -2.629921 |
| H | -1.381780 | -3.251335 | -1.806227 |
| H | -2.787829 | -4.235594 | -2.195782 |
| H | -5.991689 | -4.688502 | 2.604264  |
| H | -5.704852 | -5.637195 | 1.133693  |
| H | -4.558336 | -5.711651 | 2.474445  |
| H | -1.479559 | 2.001172  | 1.862179  |
| H | -0.602838 | 2.368677  | 0.387210  |

|   |           |           |           |
|---|-----------|-----------|-----------|
| H | -1.400018 | 3.666319  | 1.279907  |
| H | -5.569681 | 5.411594  | 0.067856  |
| H | -5.493032 | 5.258467  | -1.689686 |
| H | -6.779584 | 4.444147  | -0.795716 |
| H | -5.300675 | -0.841350 | -0.937151 |
| H | -5.807468 | 0.085798  | -2.355799 |
| H | -4.220529 | -0.684143 | -2.310509 |
| H | -0.314386 | -0.138904 | 1.298770  |
| H | 0.221472  | -2.144540 | 1.752268  |
| C | -0.392811 | 0.826603  | -2.476690 |
| C | -1.387750 | -0.308975 | -2.112603 |
| C | 1.090802  | 0.366026  | -2.520426 |
| H | -2.255096 | -0.258041 | -2.775534 |
| H | -0.903377 | -1.268919 | -2.279920 |
| H | -0.661742 | 1.185276  | -3.476992 |
| H | -0.515979 | 1.692477  | -1.819479 |
| H | 1.134499  | -0.605574 | -3.026656 |
| H | 1.626545  | 1.062488  | -3.188090 |

## G

E= -2343.3430971au

|   |           |           |           |
|---|-----------|-----------|-----------|
| C | 2.627140  | -2.816216 | -1.282674 |
| C | 2.977271  | -2.054432 | -0.135482 |
| C | 4.284403  | -2.183988 | 0.395310  |
| C | 5.205477  | -3.028612 | -0.237728 |
| C | 4.879943  | -3.769534 | -1.374060 |
| C | 3.582183  | -3.650983 | -1.874565 |
| P | 1.619836  | -0.962582 | 0.577416  |
| C | 4.740143  | -1.469886 | 1.647203  |
| C | 5.884280  | -4.692578 | -2.023346 |
| C | 1.244672  | -2.785455 | -1.905588 |
| B | -1.829795 | 0.430272  | 0.729905  |
| C | -3.076933 | -0.522293 | 0.454165  |
| C | -3.043615 | -1.716386 | -0.260394 |
| C | -4.163839 | -2.525286 | -0.429375 |
| C | -5.379228 | -2.133010 | 0.128628  |
| C | -5.457650 | -0.943515 | 0.849207  |
| C | -4.310101 | -0.169500 | 0.998982  |
| F | -1.885613 | -2.128280 | -0.815363 |
| F | -4.408442 | 0.979615  | 1.704511  |
| F | -6.621417 | -0.559751 | 1.387210  |
| F | -6.465215 | -2.896213 | -0.026692 |
| F | -4.085356 | -3.668704 | -1.120630 |

|   |           |           |           |
|---|-----------|-----------|-----------|
| C | -1.452030 | 1.534011  | -0.327129 |
| C | -1.737059 | 1.409710  | -1.700062 |
| C | -1.390013 | 2.371471  | -2.643342 |
| C | -0.736757 | 3.530379  | -2.230096 |
| C | -0.440685 | 3.711421  | -0.882537 |
| C | -0.795473 | 2.726068  | 0.033167  |
| F | -2.349577 | 0.315896  | -2.177213 |
| F | -1.673369 | 2.193649  | -3.938475 |
| F | -0.397331 | 4.460744  | -3.121890 |
| F | 0.183771  | 4.825427  | -0.481280 |
| F | -0.503015 | 2.987889  | 1.314805  |
| C | 2.412108  | 0.716091  | 0.896072  |
| C | 2.607293  | 1.389041  | 2.132728  |
| C | 2.988600  | 2.740335  | 2.132678  |
| C | 3.206637  | 3.467125  | 0.965813  |
| C | 3.056499  | 2.787190  | -0.243642 |
| C | 2.658021  | 1.449774  | -0.304462 |
| C | 2.451160  | 0.756272  | 3.501836  |
| C | 3.558756  | 4.934486  | 0.994807  |
| C | 2.496252  | 0.844642  | -1.682899 |
| H | 6.207910  | -3.111034 | 0.178111  |
| H | 3.299507  | -4.224560 | -2.755295 |
| H | 3.237609  | 3.317882  | -1.176612 |
| H | 3.118404  | 3.237585  | 3.091737  |
| H | 5.777045  | -1.729731 | 1.882012  |
| H | 4.676067  | -0.382417 | 1.550471  |
| H | 4.128303  | -1.755477 | 2.510998  |
| H | 0.956794  | -1.780256 | -2.229483 |
| H | 1.210072  | -3.444124 | -2.779467 |
| H | 0.467519  | -3.117469 | -1.209763 |
| H | 5.712496  | -5.736686 | -1.729029 |
| H | 5.818161  | -4.651984 | -3.116486 |
| H | 6.909061  | -4.435934 | -1.735637 |
| H | 2.662733  | 1.602712  | -2.454508 |
| H | 3.202234  | 0.026372  | -1.860021 |
| H | 1.490733  | 0.430529  | -1.824582 |
| H | 4.409124  | 5.158767  | 0.339920  |
| H | 2.712086  | 5.539193  | 0.645029  |
| H | 3.812338  | 5.268060  | 2.006136  |
| H | 3.073528  | -0.135942 | 3.617821  |
| H | 2.757415  | 1.466618  | 4.275613  |
| H | 1.417731  | 0.470513  | 3.722624  |
| C | 1.172956  | -1.930161 | 2.155362  |

|   |           |           |          |
|---|-----------|-----------|----------|
| C | -1.141157 | 0.374000  | 2.145189 |
| C | -0.350030 | -2.122449 | 2.330729 |
| C | -1.145604 | -0.951049 | 2.935158 |
| H | -0.782407 | -2.403281 | 1.363727 |
| H | -0.496612 | -2.988320 | 2.991902 |
| H | -0.763003 | -0.755207 | 3.947195 |
| H | -2.182258 | -1.286299 | 3.069793 |
| H | 1.623398  | -1.546720 | 3.069201 |
| H | 1.619063  | -2.915576 | 1.980948 |
| H | -0.136382 | 0.801402  | 2.104013 |
| H | -1.718872 | 1.116187  | 2.730088 |

### G<sub>1</sub>

E= -2344.5201982au

|   |           |           |           |
|---|-----------|-----------|-----------|
| C | 2.610573  | -2.816998 | -1.287732 |
| C | 2.979262  | -2.061249 | -0.144641 |
| C | 4.294724  | -2.197948 | 0.368141  |
| C | 5.203013  | -3.042390 | -0.279712 |
| C | 4.858527  | -3.778380 | -1.415710 |
| C | 3.555697  | -3.653694 | -1.896531 |
| P | 1.638552  | -0.964794 | 0.591744  |
| C | 4.768795  | -1.489399 | 1.616409  |
| C | 5.856131  | -4.699405 | -2.077942 |
| C | 1.220031  | -2.781173 | -1.892185 |
| B | -1.794624 | 0.429762  | 0.781739  |
| C | -3.052951 | -0.512413 | 0.521517  |
| C | -3.037976 | -1.713774 | -0.181353 |
| C | -4.168667 | -2.511020 | -0.335667 |
| C | -5.376062 | -2.098831 | 0.225236  |
| C | -5.436335 | -0.901262 | 0.934162  |
| C | -4.278900 | -0.139493 | 1.069455  |
| F | -1.888475 | -2.145020 | -0.739295 |
| F | -4.359386 | 1.017989  | 1.763607  |
| F | -6.592256 | -0.498301 | 1.474873  |
| F | -6.471704 | -2.850758 | 0.083912  |
| F | -4.107588 | -3.662140 | -1.015557 |
| C | -1.418030 | 1.525635  | -0.284451 |
| C | -1.705537 | 1.391539  | -1.655524 |
| C | -1.360212 | 2.345804  | -2.606348 |
| C | -0.706733 | 3.508390  | -2.203781 |
| C | -0.407596 | 3.698746  | -0.858211 |
| C | -0.760422 | 2.719892  | 0.065530  |
| F | -2.319372 | 0.292865  | -2.122812 |

|   |           |           |           |
|---|-----------|-----------|-----------|
| F | -1.646586 | 2.158325  | -3.900494 |
| F | -0.369404 | 4.431796  | -3.103302 |
| F | 0.218338  | 4.815029  | -0.466309 |
| F | -0.464781 | 2.990396  | 1.344525  |
| C | 2.444840  | 0.709558  | 0.898911  |
| C | 2.659010  | 1.381878  | 2.132873  |
| C | 3.048138  | 2.730932  | 2.127543  |
| C | 3.256128  | 3.456159  | 0.957854  |
| C | 3.087567  | 2.776588  | -0.249321 |
| C | 2.680710  | 1.441433  | -0.304714 |
| C | 2.516317  | 0.750926  | 3.504327  |
| C | 3.616638  | 4.921577  | 0.982073  |
| C | 2.499970  | 0.836808  | -1.680965 |
| H | 6.210835  | -3.130024 | 0.122364  |
| H | 3.258958  | -4.223215 | -2.774995 |
| H | 3.260455  | 3.305738  | -1.184717 |
| H | 3.192427  | 3.227774  | 3.084733  |
| H | 5.804186  | -1.762001 | 1.843294  |
| H | 4.717595  | -0.401168 | 1.519755  |
| H | 4.159896  | -1.766825 | 2.484805  |
| H | 0.932081  | -1.775649 | -2.215243 |
| H | 1.170843  | -3.441586 | -2.764021 |
| H | 0.450847  | -3.108145 | -1.185426 |
| H | 5.959285  | -5.640137 | -1.520625 |
| H | 5.550075  | -4.954917 | -3.097623 |
| H | 6.851750  | -4.243787 | -2.126289 |
| H | 2.652318  | 1.595879  | -2.454518 |
| H | 3.205872  | 0.020961  | -1.869156 |
| H | 1.493971  | 0.419261  | -1.807843 |
| H | 4.461831  | 5.140655  | 0.318778  |
| H | 2.769992  | 5.530768  | 0.640019  |
| H | 3.881873  | 5.254560  | 1.990596  |
| H | 3.136665  | -0.143535 | 3.614017  |
| H | 2.834484  | 1.460796  | 4.273707  |
| H | 1.484466  | 0.469542  | 3.737733  |
| H | -4.038147 | 0.089149  | -4.990236 |
| H | -3.531414 | 0.360987  | -4.520637 |
| C | 1.213503  | -1.931757 | 2.176234  |
| C | -1.095053 | 0.376604  | 2.191580  |
| C | -0.307107 | -2.121447 | 2.373300  |
| C | -1.093274 | -0.947016 | 2.984245  |
| H | -0.753266 | -2.405258 | 1.413528  |
| H | -0.445620 | -2.984766 | 3.039539  |

|   |           |           |          |
|---|-----------|-----------|----------|
| H | -0.698995 | -0.749592 | 3.991455 |
| H | -2.129020 | -1.279917 | 3.131062 |
| H | 1.677566  | -1.548476 | 3.083286 |
| H | 1.655572  | -2.917932 | 1.995980 |
| H | -0.090654 | 0.804074  | 2.142590 |
| H | -1.669281 | 1.119322  | 2.779296 |

## TS<sub>G12</sub>

E= -2344.4833002au

|   |           |           |           |
|---|-----------|-----------|-----------|
| C | -3.278879 | -2.523830 | 1.145305  |
| C | -3.540889 | -1.570719 | 0.126293  |
| C | -4.876920 | -1.319332 | -0.266001 |
| C | -5.915165 | -2.001576 | 0.380609  |
| C | -5.678844 | -2.934209 | 1.391121  |
| C | -4.351764 | -3.183647 | 1.751661  |
| P | -2.055241 | -0.743529 | -0.635614 |
| C | -5.240315 | -0.360793 | -1.375763 |
| C | -6.814422 | -3.666313 | 2.065874  |
| C | -1.876995 | -2.862528 | 1.612575  |
| B | 1.607669  | -0.123252 | -0.687092 |
| C | 2.796004  | -1.171743 | -0.402318 |
| C | 2.678907  | -2.479320 | 0.071723  |
| C | 3.774048  | -3.319155 | 0.269948  |
| C | 5.055383  | -2.859607 | -0.017772 |
| C | 5.223601  | -1.566255 | -0.504131 |
| C | 4.102442  | -0.760874 | -0.682864 |
| F | 1.470715  | -3.009279 | 0.368157  |
| F | 4.312149  | 0.482274  | -1.170036 |
| F | 6.451009  | -1.113787 | -0.795663 |
| F | 6.114870  | -3.657172 | 0.162698  |
| F | 3.602334  | -4.566282 | 0.732645  |
| C | 1.660980  | 1.232730  | 0.169063  |
| C | 1.828168  | 1.199037  | 1.560414  |
| C | 1.863057  | 2.334535  | 2.364005  |
| C | 1.733942  | 3.589656  | 1.774853  |
| C | 1.571619  | 3.679453  | 0.397347  |
| C | 1.541245  | 2.518010  | -0.372101 |
| F | 1.916179  | 0.014102  | 2.195832  |
| F | 2.006408  | 2.232592  | 3.693664  |
| F | 1.756352  | 4.696225  | 2.527463  |
| F | 1.430760  | 4.886011  | -0.179512 |
| F | 1.386363  | 2.698359  | -1.698630 |
| C | -2.299529 | 1.096553  | -0.704566 |

|   |           |           |           |
|---|-----------|-----------|-----------|
| C | -2.422039 | 1.914986  | -1.858140 |
| C | -2.378050 | 3.307993  | -1.709547 |
| C | -2.230559 | 3.933813  | -0.473063 |
| C | -2.163630 | 3.116250  | 0.656847  |
| C | -2.180503 | 1.722912  | 0.570635  |
| C | -2.592056 | 1.403481  | -3.273610 |
| C | -2.103299 | 5.433104  | -0.359629 |
| C | -2.059553 | 0.942920  | 1.864566  |
| H | -6.939883 | -1.798307 | 0.076979  |
| H | -4.141551 | -3.912555 | 2.531599  |
| H | -2.071497 | 3.574646  | 1.638987  |
| H | -2.457877 | 3.922632  | -2.603353 |
| H | -6.323567 | -0.339556 | -1.527064 |
| H | -4.907295 | 0.660131  | -1.165544 |
| H | -4.783578 | -0.662499 | -2.326073 |
| H | -1.373821 | -2.001850 | 2.066836  |
| H | -1.909712 | -3.656636 | 2.364492  |
| H | -1.230531 | -3.211299 | 0.800081  |
| H | -7.786773 | -3.271212 | 1.755999  |
| H | -6.796187 | -4.736371 | 1.822685  |
| H | -6.748504 | -3.584593 | 3.157313  |
| H | -2.002000 | 1.629969  | 2.713796  |
| H | -2.915838 | 0.280851  | 2.032676  |
| H | -1.152797 | 0.326454  | 1.888623  |
| H | -2.592008 | 5.812348  | 0.544488  |
| H | -1.044905 | 5.718196  | -0.305545 |
| H | -2.539929 | 5.941828  | -1.225129 |
| H | -3.355936 | 0.625558  | -3.352273 |
| H | -2.895368 | 2.223971  | -3.930363 |
| H | -1.657151 | 1.000512  | -3.680669 |
| H | -0.573952 | -0.856608 | 0.014224  |
| H | 0.248450  | -0.872363 | 0.265234  |
| C | -1.801914 | -1.640260 | -2.274707 |
| C | 0.992154  | -0.087854 | -2.161445 |
| C | -0.408676 | -2.307267 | -2.380421 |
| C | 0.718506  | -1.403639 | -2.915377 |
| H | -0.119778 | -2.743323 | -1.418741 |
| H | -0.511936 | -3.153972 | -3.072486 |
| H | 0.482556  | -1.162641 | -3.963032 |
| H | 1.637383  | -2.004029 | -2.948355 |
| H | -1.980683 | -1.001611 | -3.138506 |
| H | -2.579213 | -2.411729 | -2.281525 |
| H | 0.101863  | 0.553314  | -2.188516 |

|   |          |          |           |
|---|----------|----------|-----------|
| H | 1.731706 | 0.473469 | -2.755019 |
|---|----------|----------|-----------|

## G<sub>2</sub>

E= -2344.5204083au

|   |           |           |           |
|---|-----------|-----------|-----------|
| C | 2.973067  | -2.624527 | -1.083006 |
| C | 3.369804  | -1.740458 | -0.044046 |
| C | 4.729273  | -1.647503 | 0.340242  |
| C | 5.675002  | -2.421952 | -0.336547 |
| C | 5.317452  | -3.290093 | -1.370682 |
| C | 3.967018  | -3.374697 | -1.720295 |
| P | 2.099037  | -0.748927 | 0.832225  |
| C | 5.201731  | -0.747440 | 1.460634  |
| C | 6.351551  | -4.136148 | -2.072785 |
| C | 1.541491  | -2.811192 | -1.545410 |
| B | -1.530825 | -0.291467 | 0.459710  |
| C | -2.969172 | -1.050408 | 0.267265  |
| C | -3.057220 | -2.412222 | -0.026899 |
| C | -4.260671 | -3.096714 | -0.188670 |
| C | -5.459703 | -2.405941 | -0.047612 |
| C | -5.430904 | -1.048369 | 0.257974  |
| C | -4.201867 | -0.409866 | 0.411928  |
| F | -1.931959 | -3.163361 | -0.163889 |
| F | -4.245051 | 0.904783  | 0.724664  |
| F | -6.584631 | -0.375425 | 0.405314  |
| F | -6.631461 | -3.043275 | -0.195955 |
| F | -4.276738 | -4.411353 | -0.473235 |
| C | -1.458762 | 1.146917  | -0.346633 |
| C | -1.134470 | 1.173319  | -1.705843 |
| C | -0.935830 | 2.334839  | -2.449316 |
| C | -1.073876 | 3.569363  | -1.825880 |
| C | -1.411458 | 3.606891  | -0.478153 |
| C | -1.610444 | 2.416286  | 0.220350  |
| F | -0.920570 | 0.012359  | -2.379783 |
| F | -0.570619 | 2.274476  | -3.744023 |
| F | -0.853916 | 4.707395  | -2.505378 |
| F | -1.505924 | 4.799142  | 0.145036  |
| F | -1.930957 | 2.557445  | 1.523558  |
| C | 2.411747  | 1.064904  | 0.851829  |
| C | 2.512981  | 1.857057  | 2.022797  |
| C | 2.461347  | 3.249850  | 1.891084  |
| C | 2.315098  | 3.886336  | 0.659342  |
| C | 2.309530  | 3.086937  | -0.486292 |
| C | 2.351449  | 1.693681  | -0.426077 |

|   |            |            |            |
|---|------------|------------|------------|
| C | 2. 655015  | 1. 322861  | 3. 432539  |
| C | 2. 122766  | 5. 378385  | 0. 560950  |
| C | 2. 326408  | 0. 935914  | -1. 736094 |
| H | 6. 719431  | -2. 343920 | -0. 043945 |
| H | 3. 670554  | -4. 049929 | -2. 519409 |
| H | 2. 239565  | 3. 559958  | -1. 462340 |
| H | 2. 515134  | 3. 853185  | 2. 793995  |
| H | 6. 274581  | -0. 875556 | 1. 628378  |
| H | 5. 020929  | 0. 310981  | 1. 244064  |
| H | 4. 699423  | -0. 978207 | 2. 408914  |
| H | 0. 867244  | -3. 120629 | -0. 740468 |
| H | 1. 109493  | -1. 902874 | -1. 979348 |
| H | 1. 499172  | -3. 586852 | -2. 314638 |
| H | 7. 359538  | -3. 731279 | -1. 940037 |
| H | 6. 352417  | -5. 160374 | -1. 677462 |
| H | 6. 148646  | -4. 204880 | -3. 146859 |
| H | 2. 310649  | 1. 639412  | -2. 572491 |
| H | 3. 203710  | 0. 291935  | -1. 856461 |
| H | 1. 432598  | 0. 313281  | -1. 844638 |
| H | 2. 646953  | 5. 797783  | -0. 304433 |
| H | 1. 055249  | 5. 604089  | 0. 438693  |
| H | 2. 472293  | 5. 892939  | 1. 461342  |
| H | 3. 325476  | 0. 462099  | 3. 500109  |
| H | 3. 065116  | 2. 102111  | 4. 081160  |
| H | 1. 684095  | 1. 036954  | 3. 854837  |
| H | 0. 905527  | -0. 859724 | 0. 075555  |
| H | -0. 718311 | -1. 002143 | -0. 121225 |
| C | 1. 675237  | -1. 642134 | 2. 415649  |
| C | -1. 117681 | -0. 166150 | 2. 049351  |
| C | 0. 298688  | -2. 357058 | 2. 349686  |
| C | -0. 884558 | -1. 486063 | 2. 810187  |
| H | 0. 104566  | -2. 755274 | 1. 349194  |
| H | 0. 375329  | -3. 229082 | 3. 012206  |
| H | -0. 743368 | -1. 281674 | 3. 884438  |
| H | -1. 786259 | -2. 109157 | 2. 742330  |
| H | 1. 694791  | -0. 959917 | 3. 263147  |
| H | 2. 487168  | -2. 364113 | 2. 552163  |
| H | -0. 221569 | 0. 472134  | 2. 160683  |
| H | -1. 895378 | 0. 382650  | 2. 594417  |

**G<sub>3</sub>**

E= -2533.1050986au

|   |            |            |           |
|---|------------|------------|-----------|
| C | -3. 978709 | -2. 430989 | 0. 341807 |
|---|------------|------------|-----------|

|   |            |            |            |
|---|------------|------------|------------|
| C | -4. 014341 | -1. 126195 | -0. 226187 |
| C | -5. 235535 | -0. 411680 | -0. 289644 |
| C | -6. 386918 | -1. 010788 | 0. 234080  |
| C | -6. 377346 | -2. 282494 | 0. 807750  |
| C | -5. 163223 | -2. 973093 | 0. 845545  |
| P | -2. 412087 | -0. 460604 | -0. 845463 |
| C | 0. 898770  | -2. 575388 | 2. 963694  |
| O | 2. 028116  | -2. 791810 | 3. 156727  |
| C | -5. 383141 | 0. 966779  | -0. 895403 |
| C | -7. 638600 | -2. 907990 | 1. 351411  |
| C | -2. 721186 | -3. 270769 | 0. 439279  |
| B | 1. 368047  | -0. 108062 | -0. 784514 |
| O | -0. 246910 | -2. 376380 | 2. 813231  |
| C | 2. 628005  | -1. 157519 | -0. 678474 |
| C | 2. 511611  | -2. 459890 | -0. 196921 |
| C | 3. 572138  | -3. 358723 | -0. 102760 |
| C | 4. 837318  | -2. 958073 | -0. 518286 |
| C | 5. 012943  | -1. 670146 | -1. 017837 |
| C | 3. 918282  | -0. 811287 | -1. 087780 |
| F | 1. 302290  | -2. 937294 | 0. 222279  |
| F | 4. 152984  | 0. 423902  | -1. 585963 |
| F | 6. 230562  | -1. 276001 | -1. 426621 |
| F | 5. 875919  | -3. 804644 | -0. 443908 |
| F | 3. 386075  | -4. 601399 | 0. 375715  |
| C | 1. 710426  | 1. 264536  | 0. 067190  |
| C | 1. 778258  | 1. 204367  | 1. 462047  |
| C | 2. 000823  | 2. 295981  | 2. 297263  |
| C | 2. 174430  | 3. 553977  | 1. 729366  |
| C | 2. 124162  | 3. 675670  | 0. 346364  |
| C | 1. 906379  | 2. 548551  | -0. 446842 |
| F | 1. 581546  | 0. 017606  | 2. 096325  |
| F | 2. 033443  | 2. 153043  | 3. 634368  |
| F | 2. 370617  | 4. 633545  | 2. 503647  |
| F | 2. 246773  | 4. 897322  | -0. 214836 |
| F | 1. 860973  | 2. 783778  | -1. 776421 |
| C | -2. 192984 | 1. 341652  | -0. 634736 |
| C | -2. 232454 | 2. 286486  | -1. 690590 |
| C | -1. 936444 | 3. 619486  | -1. 396889 |
| C | -1. 606047 | 4. 052793  | -0. 110303 |
| C | -1. 625036 | 3. 110368  | 0. 919654  |
| C | -1. 903012 | 1. 760115  | 0. 693146  |
| C | -2. 553982 | 1. 961594  | -3. 133933 |
| C | -1. 206923 | 5. 483830  | 0. 147501  |

|   |           |           |           |
|---|-----------|-----------|-----------|
| C | -1.858604 | 0.819269  | 1.878541  |
| H | -7.322885 | -0.459635 | 0.187388  |
| H | -5.131992 | -3.968379 | 1.282565  |
| H | -1.394600 | 3.426857  | 1.933542  |
| H | -1.953411 | 4.342571  | -2.208646 |
| H | -6.438242 | 1.252648  | -0.920491 |
| H | -4.843117 | 1.729810  | -0.327033 |
| H | -5.014345 | 1.007055  | -1.925412 |
| H | -1.990684 | -2.854145 | 1.142785  |
| H | -2.970827 | -4.274140 | 0.794437  |
| H | -2.213156 | -3.390626 | -0.523873 |
| H | -7.990785 | -3.714778 | 0.695870  |
| H | -7.469202 | -3.348186 | 2.340504  |
| H | -8.445751 | -2.174653 | 1.438540  |
| H | -1.840691 | 1.393689  | 2.808640  |
| H | -2.727326 | 0.153168  | 1.925228  |
| H | -0.954568 | 0.198350  | 1.867984  |
| H | -1.428748 | 5.785598  | 1.176084  |
| H | -0.127330 | 5.604764  | -0.006709 |
| H | -1.716732 | 6.173158  | -0.533644 |
| H | -3.365919 | 1.236692  | -3.246081 |
| H | -2.859997 | 2.869773  | -3.660728 |
| H | -1.673730 | 1.567907  | -3.655788 |
| H | -1.442369 | -0.996278 | 0.018654  |
| H | 0.436063  | -0.619219 | -0.176619 |
| C | -2.013082 | -1.262514 | -2.482404 |
| C | 0.930888  | 0.143996  | -2.348175 |
| C | -0.629055 | -1.962704 | -2.566847 |
| C | 0.515561  | -1.109391 | -3.140783 |
| H | -0.340413 | -2.368158 | -1.592219 |
| H | -0.779033 | -2.827699 | -3.226919 |
| H | 0.245347  | -0.838396 | -4.175206 |
| H | 1.382233  | -1.778606 | -3.229076 |
| H | -2.132082 | -0.542158 | -3.291488 |
| H | -2.820994 | -1.994698 | -2.593436 |
| H | 0.115306  | 0.882871  | -2.387238 |
| H | 1.750543  | 0.612115  | -2.907098 |

### TSG34

E=-2264.7253067au

|   |           |           |          |
|---|-----------|-----------|----------|
| C | -3.542021 | -2.639419 | 0.678757 |
| C | -3.694226 | -1.249204 | 0.415542 |
| C | -4.908258 | -0.613366 | 0.798825 |

|   |           |           |           |
|---|-----------|-----------|-----------|
| C | -5.942494 | -1.396398 | 1.327455  |
| C | -5.832099 | -2.771898 | 1.528571  |
| C | -4.613563 | -3.365077 | 1.212042  |
| P | -2.185318 | -0.403651 | -0.337456 |
| C | 0.444217  | -0.634761 | 2.107442  |
| O | 1.324882  | -0.505774 | 2.923324  |
| C | -5.192942 | 0.875485  | 0.734690  |
| C | -6.971254 | -3.568449 | 2.117762  |
| C | -2.259488 | -3.413554 | 0.446277  |
| B | 1.503575  | 0.018662  | -0.471663 |
| O | -0.785784 | -0.953120 | 2.184758  |
| C | 2.464096  | -1.287711 | -0.541282 |
| C | 2.225696  | -2.568591 | -0.049352 |
| C | 3.113339  | -3.633066 | -0.200585 |
| C | 4.308288  | -3.435812 | -0.882733 |
| C | 4.589678  | -2.177885 | -1.409681 |
| C | 3.674755  | -1.146362 | -1.228684 |
| F | 1.071440  | -2.855661 | 0.600423  |
| F | 3.994065  | 0.052484  | -1.765849 |
| F | 5.730095  | -1.973492 | -2.081645 |
| F | 5.169632  | -4.445414 | -1.045777 |
| F | 2.817058  | -4.841272 | 0.295676  |
| C | 2.158921  | 1.282327  | 0.279244  |
| C | 3.209549  | 1.156376  | 1.209561  |
| C | 3.798682  | 2.240598  | 1.856373  |
| C | 3.350238  | 3.529845  | 1.591654  |
| C | 2.319573  | 3.714848  | 0.676665  |
| C | 1.757846  | 2.607931  | 0.048490  |
| F | 3.736137  | -0.038175 | 1.505505  |
| F | 4.799549  | 2.052325  | 2.723860  |
| F | 3.903680  | 4.578834  | 2.204839  |
| F | 1.873499  | 4.951529  | 0.408086  |
| F | 0.763118  | 2.886235  | -0.822068 |
| C | -2.579372 | 1.359911  | -0.763880 |
| C | -3.334798 | 1.713884  | -1.912365 |
| C | -3.471230 | 3.067949  | -2.239700 |
| C | -2.924306 | 4.087828  | -1.461037 |
| C | -2.276788 | 3.720733  | -0.279929 |
| C | -2.099868 | 2.385916  | 0.091834  |
| C | -4.119944 | 0.740802  | -2.775619 |
| C | -3.046051 | 5.536278  | -1.865256 |
| C | -1.450568 | 2.114797  | 1.430773  |
| H | -6.868724 | -0.898866 | 1.606766  |

|   |           |           |           |   |           |           |           |
|---|-----------|-----------|-----------|---|-----------|-----------|-----------|
| H | -4.474781 | -4.427636 | 1.398607  | C | 5.394628  | -3.144139 | -0.832947 |
| H | -1.893799 | 4.496315  | 0.378848  | P | 2.196039  | -0.875722 | 0.346133  |
| H | -4.051310 | 3.329836  | -3.122445 | C | -0.805428 | -2.332490 | -1.563424 |
| H | -6.121978 | 1.087552  | 1.271697  | O | -1.735246 | -2.891742 | -2.075586 |
| H | -4.405369 | 1.472256  | 1.199664  | C | 5.110394  | 0.935511  | 0.480829  |
| H | -5.316919 | 1.247597  | -0.285832 | C | 7.886175  | -2.871217 | -1.134135 |
| H | -2.126280 | -3.711694 | -0.600001 | C | 2.981777  | -3.650257 | -0.664792 |
| H | -1.372390 | -2.859519 | 0.759997  | B | -1.885981 | -0.071068 | 1.013077  |
| H | -2.275743 | -4.334588 | 1.035866  | O | 0.397108  | -2.199436 | -2.115455 |
| H | -7.925716 | -3.312320 | 1.643706  | C | -3.172666 | -0.911793 | 0.652830  |
| H | -6.810878 | -4.644519 | 1.998968  | C | -3.251026 | -2.307477 | 0.641345  |
| H | -7.079960 | -3.366950 | 3.191363  | C | -4.387082 | -3.008371 | 0.263372  |
| H | -1.421839 | 3.034517  | 2.022303  | C | -5.528463 | -2.307598 | -0.095898 |
| H | -1.983137 | 1.361578  | 2.018951  | C | -5.515637 | -0.918344 | -0.080613 |
| H | -0.418474 | 1.770182  | 1.330106  | C | -4.354466 | -0.253588 | 0.280190  |
| H | -3.195978 | 6.184338  | -0.995129 | F | -2.192934 | -3.053854 | 0.968150  |
| H | -2.131486 | 5.877111  | -2.368028 | F | -4.421234 | 1.081339  | 0.294860  |
| H | -3.879536 | 5.692779  | -2.557534 | F | -6.613383 | -0.241529 | -0.405035 |
| H | -4.366170 | -0.188962 | -2.257382 | F | -6.628328 | -2.957199 | -0.444800 |
| H | -5.065816 | 1.207161  | -3.070452 | F | -4.389917 | -4.335587 | 0.252119  |
| H | -3.598036 | 0.483943  | -3.705687 | C | -1.669455 | 1.290148  | 0.220154  |
| H | -1.261520 | -0.651545 | 0.927935  | C | -1.685330 | 1.354372  | -1.171074 |
| H | 0.727264  | -0.399625 | 0.979723  | C | -1.497686 | 2.531864  | -1.880218 |
| C | -1.928695 | -1.337383 | -1.953121 | C | -1.332903 | 3.719869  | -1.183434 |
| C | 0.668315  | 0.276991  | -1.807679 | C | -1.335143 | 3.709990  | 0.203133  |
| C | -0.547281 | -1.950045 | -2.217859 | C | -1.474158 | 2.505551  | 0.874798  |
| C | 0.436452  | -0.910169 | -2.754005 | F | -1.861335 | 0.238947  | -1.890426 |
| H | -0.153513 | -2.433599 | -1.321602 | F | -1.465179 | 2.529466  | -3.209840 |
| H | -0.678385 | -2.744578 | -2.964820 | F | -1.133905 | 4.858694  | -1.840555 |
| H | 0.055911  | -0.534426 | -3.715424 | F | -1.164643 | 4.845785  | 0.876505  |
| H | 1.390662  | -1.399751 | -2.977181 | F | -1.459680 | 2.562855  | 2.212495  |
| H | -2.151722 | -0.639910 | -2.759684 | C | 2.088669  | 0.974905  | 0.467510  |
| H | -2.712593 | -2.097921 | -1.967391 | C | 2.168885  | 1.784483  | 1.622093  |
| H | -0.245126 | 0.861700  | -1.672014 | C | 2.051450  | 3.171767  | 1.497307  |
| H | 1.331582  | 0.985551  | -2.330981 | C | 1.902936  | 3.802978  | 0.269384  |
|   |           |           |           | C | 1.841099  | 2.996411  | -0.862929 |
|   |           |           |           | C | 1.909489  | 1.607421  | -0.789882 |
|   |           |           |           | C | 2.440739  | 1.268827  | 3.017010  |
|   |           |           |           | C | 1.828630  | 5.302696  | 0.151181  |
|   |           |           |           | C | 1.817781  | 0.850009  | -2.096699 |
|   |           |           |           | H | 7.219509  | -0.371350 | -0.303362 |
|   |           |           |           | H | 5.496752  | -4.173847 | -1.168995 |
|   |           |           |           | H | 1.720559  | 3.464668  | -1.837834 |

#### G<sub>4</sub>

E= -2532.4142868au

|   |          |           |           |   |          |           |           |
|---|----------|-----------|-----------|---|----------|-----------|-----------|
| C | 4.127762 | -2.673610 | -0.491161 | C | 1.828630 | 5.302696  | 0.151181  |
| C | 3.966335 | -1.337107 | -0.040899 | C | 1.817781 | 0.850009  | -2.096699 |
| C | 5.108491 | -0.505381 | 0.022908  | H | 7.219509 | -0.371350 | -0.303362 |
| C | 6.350839 | -1.024543 | -0.353438 | H | 5.496752 | -4.173847 | -1.168995 |
| C | 6.523798 | -2.335671 | -0.777163 | H | 1.720559 | 3.464668  | -1.837834 |

|   |           |           |           |   |           |           |           |
|---|-----------|-----------|-----------|---|-----------|-----------|-----------|
| H | 2.106571  | 3.780236  | 2.397098  | C | 5.173765  | -0.264507 | 0.633380  |
| H | 6.137248  | 1.309845  | 0.517879  | C | 6.170633  | -4.528011 | -1.797629 |
| H | 4.543293  | 1.589122  | -0.187188 | C | 1.366459  | -3.412497 | -0.893709 |
| H | 4.686958  | 1.049456  | 1.480382  | B | -2.027809 | 0.129371  | 0.961275  |
| H | 2.381228  | -3.410369 | -1.547935 | C | -3.049886 | -0.873836 | 0.271719  |
| H | 3.373982  | -4.661052 | -0.806963 | C | -2.756786 | -1.605898 | -0.875097 |
| H | 2.297965  | -3.692224 | 0.187645  | C | -3.635433 | -2.536760 | -1.420108 |
| H | 8.359929  | -3.339592 | -0.262869 | C | -4.866900 | -2.751192 | -0.802606 |
| H | 7.822754  | -3.630073 | -1.920249 | C | -5.199961 | -2.038347 | 0.346982  |
| H | 8.550965  | -2.074507 | -1.481700 | C | -4.285515 | -1.123141 | 0.862156  |
| H | 1.867822  | 1.548246  | -2.936702 | F | -1.574498 | -1.414525 | -1.499095 |
| H | 2.628718  | 0.125214  | -2.224931 | F | -4.623558 | -0.447793 | 1.982553  |
| H | 0.871783  | 0.306576  | -2.187326 | F | -6.381750 | -2.239830 | 0.942131  |
| H | 2.777969  | 5.708960  | -0.217079 | F | -5.725957 | -3.638538 | -1.313421 |
| H | 1.047478  | 5.603619  | -0.552721 | F | -3.314260 | -3.221349 | -2.524453 |
| H | 1.613054  | 5.769876  | 1.115657  | C | -1.826489 | 1.579742  | 0.388100  |
| H | 3.259430  | 0.543634  | 3.035165  | C | -2.253532 | 1.966424  | -0.898935 |
| H | 2.724972  | 2.096886  | 3.671703  | C | -1.997378 | 3.218729  | -1.448690 |
| H | 1.560937  | 0.794239  | 3.465429  | C | -1.297937 | 4.161947  | -0.702054 |
| H | 0.977653  | -1.749380 | -1.451126 | C | -0.873053 | 3.847712  | 0.584860  |
| H | -0.860688 | -1.866759 | -0.562930 | C | -1.141329 | 2.585357  | 1.100167  |
| C | 1.923407  | -1.751781 | 1.991404  | F | -2.927439 | 1.118291  | -1.687962 |
| C | -0.900929 | -0.300127 | 2.215778  | F | -2.411181 | 3.520545  | -2.683771 |
| C | 0.552668  | -2.444367 | 2.133246  | F | -1.031197 | 5.362575  | -1.218298 |
| C | -0.519820 | -1.632488 | 2.869094  | F | -0.207937 | 4.755512  | 1.305934  |
| H | 0.183760  | -2.751612 | 1.149768  | F | -0.715653 | 2.372337  | 2.356588  |
| H | 0.701860  | -3.372577 | 2.698317  | C | 2.276089  | 1.039935  | 0.153119  |
| H | -0.134983 | -1.416314 | 3.875501  | C | 2.590975  | 2.136628  | 0.999979  |
| H | -1.404110 | -2.258959 | 3.010606  | C | 2.699000  | 3.424447  | 0.454162  |
| H | 2.118798  | -1.124260 | 2.857830  | C | 2.510782  | 3.691978  | -0.900723 |
| H | 2.712020  | -2.510231 | 2.000534  | C | 2.206060  | 2.609268  | -1.725942 |
| H | -0.000916 | 0.295776  | 2.035915  | C | 2.070232  | 1.307413  | -1.233063 |
| H | -1.448568 | 0.298394  | 2.971015  | C | 2.811919  | 2.042117  | 2.496765  |

## H

E= -2382.6569178au

|   |          |           |           |   |          |           |           |
|---|----------|-----------|-----------|---|----------|-----------|-----------|
| C | 2.818366 | -2.998074 | -0.739829 | H | 6.599879 | -2.180409 | -0.480280 |
| C | 3.227872 | -1.804656 | -0.087883 | H | 3.452243 | -4.776690 | -1.761226 |
| C | 4.616151 | -1.516268 | -0.007775 | H | 2.055360 | 2.778716  | -2.790475 |
| C | 5.539399 | -2.414242 | -0.555504 | H | 2.941089 | 4.248104  | 1.122621  |
| C | 5.149417 | -3.594044 | -1.192176 | H | 6.264804 | -0.324125 | 0.696925  |
| C | 3.784121 | -3.863845 | -1.270603 | H | 4.918365 | 0.632362  | 0.060507  |
| P | 1.861162 | -0.732332 | 0.637427  | H | 4.793987 | -0.109496 | 1.647437  |
|   |          |           |           | H | 0.734755 | -2.605795 | -1.273349 |



|   |           |           |           |   |           |           |           |
|---|-----------|-----------|-----------|---|-----------|-----------|-----------|
| H | 1.288950  | -4.260202 | -1.582411 | C | -3.016420 | -0.973275 | 0.285540  |
| H | 0.927069  | -3.729200 | 0.060005  | C | -2.718316 | -1.661930 | -0.886551 |
| H | 6.463278  | -4.197804 | -2.803481 | C | -3.577265 | -2.601046 | -1.448492 |
| H | 7.083919  | -4.569536 | -1.193655 | C | -4.793688 | -2.869275 | -0.822268 |
| H | 5.777775  | -5.545933 | -1.890401 | C | -5.131223 | -2.201304 | 0.352736  |
| H | 1.520297  | 0.673563  | -3.217530 | C | -4.236171 | -1.276251 | 0.884137  |
| H | 2.445324  | -0.542634 | -2.328640 | F | -1.549873 | -1.418937 | -1.518407 |
| H | 0.751296  | -0.268275 | -1.930694 | F | -4.577251 | -0.646282 | 2.029654  |
| H | 2.955782  | 5.114285  | -2.474359 | F | -6.298555 | -2.454825 | 0.956405  |
| H | 1.593412  | 5.570183  | -1.446142 | F | -5.633836 | -3.765326 | -1.348904 |
| H | 3.243577  | 5.730170  | -0.836085 | F | -3.251428 | -3.242737 | -2.576890 |
| H | 3.470697  | 1.219281  | 2.780132  | C | -1.844751 | 1.503312  | 0.454276  |
| H | 3.265208  | 2.967247  | 2.865638  | C | -2.299667 | 1.915302  | -0.815282 |
| H | 1.865570  | 1.915852  | 3.035742  | C | -2.074973 | 3.186344  | -1.334733 |
| C | 2.144643  | -1.038121 | 2.491001  | C | -1.380534 | 4.122294  | -0.575022 |
| C | -1.262217 | -0.379163 | 2.242349  | C | -0.929345 | 3.783067  | 0.696307  |
| C | 1.488199  | -2.365178 | 2.946893  | C | -1.166090 | 2.502460  | 1.181756  |
| C | -1.043790 | -1.903832 | 2.365364  | F | -2.971917 | 1.077029  | -1.615750 |
| C | 0.017526  | -2.305734 | 3.413428  | F | -2.514731 | 3.512802  | -2.555684 |
| H | -0.310381 | 0.146908  | 2.325227  | F | -1.143571 | 5.341195  | -1.064099 |
| H | -1.840416 | -0.026388 | 3.116513  | F | -0.270108 | 4.684090  | 1.430700  |
| H | -0.756749 | -2.321335 | 1.392708  | F | -0.715832 | 2.264808  | 2.424729  |
| H | -1.998784 | -2.376638 | 2.627519  | C | 2.270300  | 1.045221  | 0.204174  |
| H | -0.057333 | -1.633882 | 4.281552  | C | 2.573405  | 2.116366  | 1.087437  |
| H | -0.229760 | -3.307190 | 3.791031  | C | 2.652624  | 3.424902  | 0.587550  |
| H | 1.589709  | -3.123818 | 2.159877  | C | 2.447023  | 3.737720  | -0.754844 |
| H | 2.076540  | -2.746217 | 3.792619  | C | 2.155442  | 2.679743  | -1.616400 |
| H | 1.722954  | -0.213592 | 3.067739  | C | 2.048365  | 1.358699  | -1.170003 |
| H | 3.214708  | -1.072558 | 2.715224  | C | 2.812591  | 1.974110  | 2.577852  |

## H<sub>1</sub>

E= -2383.8339887au

|   |           |           |           |   |          |           |           |
|---|-----------|-----------|-----------|---|----------|-----------|-----------|
| C | 2.873802  | -2.952364 | -0.828970 | H | 6.643343 | -2.083689 | -0.561446 |
| C | 3.268224  | -1.775213 | -0.139181 | H | 3.529774 | -4.685309 | -1.913032 |
| C | 4.652116  | -1.467394 | -0.056690 | H | 1.992868 | 2.884502  | -2.672952 |
| C | 5.586288  | -2.331833 | -0.638826 | H | 2.885583 | 4.228294  | 1.283312  |
| C | 5.211351  | -3.495783 | -1.312532 | H | 6.285787 | -0.268914 | 0.671909  |
| C | 3.849997  | -3.784472 | -1.393296 | H | 4.912858 | 0.682810  | 0.086411  |
| P | 1.888251  | -0.750326 | 0.628235  | H | 4.822795 | -0.118659 | 1.646477  |
| C | 5.193122  | -0.228878 | 0.623033  | H | 0.780152 | -2.572194 | -1.329251 |
| C | 6.243671  | -4.392494 | -1.954409 | H | 1.357815 | -4.203440 | -1.711566 |
| C | 1.427634  | -3.383824 | -0.988909 | H | 1.002127 | -3.746919 | -0.045414 |
| B | -2.012166 | 0.035105  | 0.993171  | H | 6.512823 | -4.033510 | -2.956982 |
|   |           |           |           | H | 7.166982 | -4.426544 | -1.365494 |

|   |           |           |           |   |           |           |           |
|---|-----------|-----------|-----------|---|-----------|-----------|-----------|
| H | 5.872404  | -5.416827 | -2.064341 | C | -3.895508 | -3.082879 | -0.962130 |
| H | 1.503462  | 0.785405  | -3.174126 | C | -5.169749 | -2.679368 | -0.575564 |
| H | 2.446820  | -0.447314 | -2.328838 | C | -5.317428 | -1.534441 | 0.202108  |
| H | 0.749904  | -0.210425 | -1.919406 | C | -4.182402 | -0.816711 | 0.568269  |
| H | 2.880858  | 5.225695  | -2.269879 | F | -1.585876 | -2.801144 | -0.979347 |
| H | 1.487336  | 5.608102  | -1.254487 | F | -4.368973 | 0.281318  | 1.334859  |
| H | 3.120406  | 5.791553  | -0.605973 | F | -6.538605 | -1.140183 | 0.589980  |
| H | 3.487056  | 1.152815  | 2.826417  | F | -6.243072 | -3.390649 | -0.941570 |
| H | 3.256360  | 2.893148  | 2.972653  | F | -3.745247 | -4.188805 | -1.706391 |
| H | 1.874822  | 1.815529  | 3.123419  | C | -1.664918 | 1.256538  | 0.207639  |
| H | -1.770208 | 6.315487  | -4.220369 | C | -1.868954 | 1.550256  | -1.147314 |
| H | -1.804999 | 5.834726  | -3.655727 | C | -1.833431 | 2.838757  | -1.670643 |
| C | 2.186880  | -1.111014 | 2.469151  | C | -1.588060 | 3.910969  | -0.817712 |
| C | -1.226301 | -0.487404 | 2.256312  | C | -1.380718 | 3.676521  | 0.536265  |
| C | 1.548324  | -2.458271 | 2.890091  | C | -1.426509 | 2.370482  | 1.018855  |
| C | -0.995756 | -2.011939 | 2.352787  | F | -2.061137 | 0.549549  | -2.028712 |
| C | 0.083512  | -2.425630 | 3.377182  | F | -2.009811 | 3.055981  | -2.982059 |
| H | -0.277048 | 0.044892  | 2.331493  | F | -1.513062 | 5.158690  | -1.304923 |
| H | -1.792590 | -0.150583 | 3.144312  | F | -1.121445 | 4.703149  | 1.359652  |
| H | -0.722016 | -2.413407 | 1.369529  | F | -1.206764 | 2.224988  | 2.344094  |
| H | -1.943895 | -2.494405 | 2.622313  | C | 2.216463  | 1.215227  | 0.216423  |
| H | 0.013260  | -1.775149 | 4.261847  | C | 2.374181  | 2.310005  | 1.105937  |
| H | -0.148508 | -3.438248 | 3.734188  | C | 2.365101  | 3.613811  | 0.592196  |
| H | 1.645497  | -3.191283 | 2.078566  | C | 2.202229  | 3.892825  | -0.763543 |
| H | 2.150605  | -2.860499 | 3.715932  | C | 2.062527  | 2.806313  | -1.627463 |
| H | 1.759383  | -0.309962 | 3.073878  | C | 2.051531  | 1.484223  | -1.173554 |
| H | 3.258782  | -1.139368 | 2.685238  | C | 2.520954  | 2.197703  | 2.609675  |

## TS<sub>H12</sub>

E= -2383.7935329au

|   |           |           |           |   |          |           |           |
|---|-----------|-----------|-----------|---|----------|-----------|-----------|
| C | 3.090759  | -2.749431 | -0.782688 | C | 2.121065 | 5.311960  | -1.271181 |
| C | 3.419953  | -1.544376 | -0.107529 | C | 1.852780 | 0.403120  | -2.218380 |
| C | 4.776270  | -1.142771 | -0.022389 | H | 6.801107 | -1.642691 | -0.523476 |
| C | 5.762120  | -1.957396 | -0.594653 | H | 3.852407 | -4.449035 | -1.842868 |
| C | 5.459303  | -3.150301 | -1.251019 | H | 1.936885 | 2.988150  | -2.692513 |
| C | 4.115908  | -3.525121 | -1.332299 | H | 2.478510 | 4.441314  | 1.288806  |
| P | 2.020791  | -0.585047 | 0.674030  | H | 6.323190 | 0.149870  | 0.731790  |
| C | 5.233827  | 0.144116  | 0.630152  | H | 4.947469 | 1.019847  | 0.038178  |
| C | 6.540733  | -4.005695 | -1.866956 | H | 4.811049 | 0.288104  | 1.628970  |
| C | 1.666856  | -3.239857 | -0.948743 | H | 1.027232 | -2.511420 | -1.456186 |
| B | -1.679267 | -0.253566 | 0.737241  | H | 1.648949 | -4.159632 | -1.540804 |
| C | -2.883106 | -1.176604 | 0.200926  | H | 1.185664 | -3.463003 | 0.009565  |
| C | -2.785583 | -2.335954 | -0.569490 | H | 6.456777 | -4.023403 | -2.961050 |
|   |           |           |           | H | 7.538568 | -3.632978 | -1.615934 |
|   |           |           |           | H | 6.471338 | -5.044694 | -1.523446 |
|   |           |           |           | H | 1.693123 | 0.858321  | -3.199976 |

|   |           |           |           |   |           |           |           |
|---|-----------|-----------|-----------|---|-----------|-----------|-----------|
| H | 2.717746  | -0.263167 | -2.298870 | C | -5.226224 | -1.787405 | 0.255348  |
| H | 0.971196  | -0.213378 | -2.009002 | C | -4.102440 | -1.015829 | 0.542731  |
| H | 2.572722  | 5.410966  | -2.264245 | F | -1.515892 | -2.948108 | -1.082978 |
| H | 1.073440  | 5.628671  | -1.355354 | F | -4.307921 | 0.096225  | 1.284625  |
| H | 2.623221  | 6.010833  | -0.594390 | F | -6.445308 | -1.428926 | 0.693549  |
| H | 3.284910  | 1.478307  | 2.914400  | F | -6.143793 | -3.714508 | -0.780782 |
| H | 2.803787  | 3.167975  | 3.027651  | F | -3.655856 | -4.445799 | -1.653986 |
| H | 1.573736  | 1.913296  | 3.083321  | C | -1.754880 | 1.170079  | 0.054285  |
| H | 0.524922  | -0.817025 | 0.092776  | C | -1.716807 | 1.526767  | -1.297027 |
| H | -0.264069 | -0.837054 | -0.248825 | C | -1.775422 | 2.836183  | -1.766126 |
| C | 2.303639  | -0.952669 | 2.505790  | C | -1.914655 | 3.875705  | -0.853726 |
| C | -1.057339 | -0.623977 | 2.155689  | C | -1.992489 | 3.581354  | 0.501759  |
| C | 1.791119  | -2.353265 | 2.926803  | C | -1.922164 | 2.252091  | 0.921398  |
| C | -0.757114 | -2.126274 | 2.362007  | F | -1.554252 | 0.569532  | -2.243066 |
| C | 0.328937  | -2.438196 | 3.409143  | F | -1.659462 | 3.110220  | -3.080023 |
| H | -0.157211 | -0.023028 | 2.322795  | F | -1.924758 | 5.155879  | -1.276096 |
| H | -1.747324 | -0.282270 | 2.942460  | F | -2.117944 | 4.580472  | 1.393677  |
| H | -0.472217 | -2.593903 | 1.409834  | F | -1.988970 | 2.066616  | 2.258813  |
| H | -1.686666 | -2.628471 | 2.658025  | C | 2.313414  | 1.368397  | 0.247272  |
| H | 0.199409  | -1.780438 | 4.281200  | C | 2.546015  | 2.472821  | 1.106368  |
| H | 0.182010  | -3.461742 | 3.779963  | C | 2.354790  | 3.763008  | 0.598008  |
| H | 1.957828  | -3.078704 | 2.119983  | C | 1.939141  | 4.005872  | -0.710974 |
| H | 2.433115  | -2.686739 | 3.752634  | C | 1.760776  | 2.903364  | -1.549759 |
| H | 1.816054  | -0.192767 | 3.114077  | C | 1.933431  | 1.590878  | -1.108140 |
| H | 3.378899  | -0.887849 | 2.695846  | C | 2.969635  | 2.382693  | 2.557769  |

## H<sub>2</sub>

E= -2383.8302286au

|   |           |           |           |   |          |           |           |
|---|-----------|-----------|-----------|---|----------|-----------|-----------|
| C | 3.203215  | -2.611337 | -0.735427 | C | 1.658532 | 5.403551  | -1.203371 |
| C | 3.593032  | -1.429680 | -0.047354 | C | 1.685515 | 0.478868  | -2.103669 |
| C | 4.960629  | -1.057650 | 0.014920  | H | 6.955523 | -1.583205 | -0.560315 |
| C | 5.908227  | -1.871572 | -0.610436 | H | 3.905952 | -4.289424 | -1.861700 |
| C | 5.553845  | -3.036536 | -1.294806 | H | 1.445164 | 3.064345  | -2.577481 |
| C | 4.202265  | -3.383872 | -1.338135 | H | 2.522809 | 4.607110  | 1.262191  |
| P | 2.318072  | -0.394652 | 0.776042  | H | 6.536007 | 0.284722  | 0.605469  |
| C | 5.454199  | 0.183481  | 0.726636  | H | 4.988839 | 1.095072  | 0.338470  |
| C | 6.594726  | -3.880599 | -1.988587 | H | 5.258185 | 0.147331  | 1.805339  |
| C | 1.774056  | -3.097480 | -0.858064 | H | 1.108098 | -2.372067 | -1.334543 |
| B | -1.518312 | -0.399996 | 0.491074  | H | 1.740580 | -4.009754 | -1.459212 |
| C | -2.810840 | -1.332302 | 0.116123  | H | 1.329020 | -3.336872 | 0.112947  |
| C | -2.717484 | -2.510897 | -0.624742 | H | 6.680339 | -3.601065 | -3.046913 |
| C | -3.810830 | -3.317968 | -0.936500 | H | 7.582771 | -3.753008 | -1.535272 |
| C | -5.077419 | -2.950858 | -0.494344 | H | 6.335581 | -4.943813 | -1.954378 |
|   |           |           |           | H | 1.491789 | 0.901676  | -3.092501 |
|   |           |           |           | H | 2.542932 | -0.195758 | -2.194243 |
|   |           |           |           | H | 0.800241 | -0.110281 | -1.838937 |

|   |           |           |           |
|---|-----------|-----------|-----------|
| H | 2.081138  | 5.568591  | -2.200794 |
| H | 0.576595  | 5.569747  | -1.278111 |
| H | 2.067761  | 6.159613  | -0.526455 |
| H | 3.742265  | 1.631631  | 2.736489  |
| H | 3.374608  | 3.344916  | 2.882823  |
| H | 2.121097  | 2.159240  | 3.215105  |
| C | 2.397575  | -0.719086 | 2.601615  |
| C | -1.033873 | -0.621053 | 2.043909  |
| C | 1.923466  | -2.138277 | 3.018117  |
| C | -0.613510 | -2.079995 | 2.337571  |
| C | 0.446204  | -2.278989 | 3.439873  |
| H | -0.197961 | 0.067269  | 2.253974  |
| H | -1.803807 | -0.328889 | 2.768249  |
| H | -0.261413 | -2.572487 | 1.418469  |
| H | -1.510656 | -2.644662 | 2.620844  |
| H | 0.246299  | -1.589150 | 4.272546  |
| H | 0.352686  | -3.291089 | 3.857851  |
| H | 2.160112  | -2.867228 | 2.232152  |
| H | 2.549388  | -2.424371 | 3.872688  |
| H | 1.803650  | 0.042032  | 3.108280  |
| H | 3.441387  | -0.574220 | 2.893593  |
| H | -0.595628 | -0.787954 | -0.230336 |
| H | 1.054634  | -0.864998 | 0.339023  |

### H<sub>3</sub>

E= -2572.4225398au

|   |           |           |           |
|---|-----------|-----------|-----------|
| C | -4.473454 | -1.568881 | 0.422932  |
| C | -4.160744 | -0.320252 | -0.182839 |
| C | -5.189424 | 0.624028  | -0.428971 |
| C | -6.498086 | 0.312188  | -0.051150 |
| C | -6.829925 | -0.901931 | 0.553092  |
| C | -5.803310 | -1.821586 | 0.776595  |
| P | -2.412587 | 0.034922  | -0.644060 |
| C | 2.320314  | 0.877639  | 3.885959  |
| O | 3.381933  | 0.500140  | 3.580733  |
| C | -4.947310 | 1.958183  | -1.098082 |
| C | -8.255852 | -1.223541 | 0.928097  |
| C | -3.460881 | -2.662095 | 0.705809  |
| B | 1.236341  | -0.733804 | -1.339865 |
| O | 1.263603  | 1.245649  | 4.232372  |
| C | 1.888208  | -1.949069 | -0.439508 |
| C | 1.228186  | -2.609746 | 0.593064  |
| C | 1.783087  | -3.635522 | 1.355143  |

|   |           |           |           |
|---|-----------|-----------|-----------|
| C | 3.085215  | -4.045130 | 1.090444  |
| C | 3.798559  | -3.420826 | 0.070427  |
| C | 3.192767  | -2.400686 | -0.660136 |
| F | -0.062117 | -2.280584 | 0.923485  |
| F | 3.940114  | -1.832372 | -1.631638 |
| F | 5.056280  | -3.809391 | -0.193391 |
| F | 3.644790  | -5.032128 | 1.806282  |
| F | 1.078302  | -4.229601 | 2.335617  |
| C | 2.099065  | 0.648026  | -1.074268 |
| C | 2.095683  | 1.210449  | 0.205631  |
| C | 2.734026  | 2.397013  | 0.546174  |
| C | 3.446625  | 3.091520  | -0.425148 |
| C | 3.498302  | 2.574364  | -1.714276 |
| C | 2.836964  | 1.379052  | -2.008329 |
| F | 1.419635  | 0.592749  | 1.212394  |
| F | 2.658040  | 2.893819  | 1.803365  |
| F | 4.064193  | 4.244340  | -0.122338 |
| F | 4.180149  | -3.233907 | -2.666146 |
| F | 2.937982  | 0.965576  | -3.290188 |
| C | -1.759645 | 1.602634  | 0.051518  |
| C | -1.432063 | 2.747419  | -0.719642 |
| C | -0.893606 | 3.857749  | -0.060825 |
| C | -0.643675 | 3.873957  | 1.311826  |
| C | -0.976350 | 2.735603  | 2.048113  |
| C | -1.522073 | 1.597099  | 1.453628  |
| C | -1.572532 | 2.860302  | -2.223020 |
| C | 0.015744  | 5.057545  | 1.973393  |
| C | -1.774252 | 0.395982  | 2.337220  |
| H | -7.280713 | 1.044084  | -0.236244 |
| H | -6.040536 | -2.774142 | 1.244187  |
| H | -0.775083 | 2.714777  | 3.115142  |
| H | -0.640421 | 4.733935  | -0.652658 |
| H | -5.867960 | 2.547668  | -1.116882 |
| H | -4.184004 | 2.549320  | -0.583760 |
| H | -4.627411 | 1.836229  | -2.140587 |
| H | -3.962190 | -3.520716 | 1.160190  |
| H | -2.968494 | -3.020782 | -0.204013 |
| H | -2.670541 | -2.348843 | 1.395760  |
| H | -8.845605 | -0.314195 | 1.080275  |
| H | -8.746334 | -1.804538 | 0.135983  |
| H | -8.303746 | -1.820548 | 1.844751  |
| H | -1.625235 | 0.663859  | 3.385847  |
| H | -2.792153 | 0.002560  | 2.238049  |

|   |           |           |           |
|---|-----------|-----------|-----------|
| H | -1.065411 | -0.408454 | 2.107992  |
| H | -0.406346 | 5.250734  | 2.965417  |
| H | 1.085780  | 4.856106  | 2.105143  |
| H | -0.084070 | 5.966001  | 1.371309  |
| H | -2.525399 | 2.484749  | -2.601993 |
| H | -1.496626 | 3.908634  | -2.524212 |
| H | -0.768883 | 2.320935  | -2.737035 |
| H | -1.679931 | -0.972819 | -0.010648 |
| H | 0.138996  | -0.484355 | -0.861336 |
| C | -2.181044 | -0.230234 | -2.459335 |
| C | 1.052567  | -1.168556 | -2.911734 |
| C | -2.270012 | -1.712293 | -2.889077 |
| C | 0.239300  | -2.459403 | -3.168111 |
| C | -1.119994 | -2.642866 | -2.458094 |
| H | -2.954786 | 0.350258  | -2.970599 |
| H | -1.207618 | 0.184393  | -2.715477 |
| H | -3.231172 | -2.124398 | -2.551385 |
| H | -2.322806 | -1.702377 | -3.986456 |
| H | -0.973167 | -2.594243 | -1.374039 |
| H | -1.464101 | -3.666309 | -2.665048 |
| H | 0.855647  | -3.314983 | -2.859248 |
| H | 0.075842  | -2.593300 | -4.249937 |
| H | 2.029916  | -1.319823 | -3.385413 |
| H | 0.608800  | -0.336193 | -3.483780 |

### TS<sub>H34</sub>

E= -2572.3597376au

|   |           |           |           |
|---|-----------|-----------|-----------|
| C | 3.628937  | -2.711483 | -0.867052 |
| C | 3.641524  | -1.497453 | -0.124571 |
| C | 4.898624  | -0.908346 | 0.190880  |
| C | 6.073046  | -1.495946 | -0.295553 |
| C | 6.073435  | -2.658712 | -1.063142 |
| C | 4.840054  | -3.253146 | -1.316866 |
| P | 2.005529  | -0.762025 | 0.482236  |
| C | -0.834575 | -1.782478 | -1.620270 |
| O | -1.695297 | -2.349017 | -2.246157 |
| C | 5.096561  | 0.327307  | 1.045932  |
| C | 7.358347  | -3.277218 | -1.558866 |
| C | 2.390987  | -3.504838 | -1.232562 |
| B | -1.679551 | -0.324306 | 0.663559  |
| O | 0.383548  | -1.502704 | -1.861383 |
| C | -3.183355 | -0.851024 | 0.360392  |
| C | -3.529912 | -2.201047 | 0.213417  |

|   |           |           |           |
|---|-----------|-----------|-----------|
| C | -4.824523 | -2.648349 | -0.035023 |
| C | -5.860043 | -1.725415 | -0.130033 |
| C | -5.579302 | -0.372550 | 0.028935  |
| C | -4.268426 | 0.032686  | 0.265866  |
| F | -2.591952 | -3.163710 | 0.316682  |
| F | -4.093703 | 1.360308  | 0.439865  |
| F | -6.569670 | 0.528076  | -0.036316 |
| F | -7.112173 | -2.133722 | -0.356859 |
| F | -5.080128 | -3.955665 | -0.170212 |
| C | -1.362939 | 1.131229  | 0.060059  |
| C | -1.581429 | 1.466512  | -1.285058 |
| C | -1.421872 | 2.748590  | -1.803923 |
| C | -1.075614 | 3.789360  | -0.949546 |
| C | -0.898948 | 3.526055  | 0.402255  |
| C | -1.034428 | 2.224258  | 0.873090  |
| F | -1.983808 | 0.529180  | -2.157925 |
| F | -1.615876 | 2.988594  | -3.106273 |
| F | -0.900185 | 5.030024  | -1.419985 |
| F | -0.573315 | 4.524833  | 1.237330  |
| F | -0.870014 | 2.075597  | 2.205875  |
| C | 2.198391  | 1.093444  | 0.473060  |
| C | 2.226106  | 1.944619  | 1.612194  |
| C | 2.353685  | 3.326100  | 1.420150  |
| C | 2.461631  | 3.911700  | 0.160124  |
| C | 2.475638  | 3.057926  | -0.941633 |
| C | 2.343950  | 1.670292  | -0.823305 |
| C | 2.146925  | 1.503325  | 3.061097  |
| C | 2.504382  | 5.409431  | -0.011499 |
| C | 2.403566  | 0.873939  | -2.110481 |
| H | 7.022796  | -1.024844 | -0.052370 |
| H | 4.805619  | -4.179515 | -1.886318 |
| H | 2.585188  | 3.480622  | -1.937636 |
| H | 2.356374  | 3.968092  | 2.297110  |
| H | 6.148376  | 0.404786  | 1.336788  |
| H | 4.830127  | 1.248840  | 0.520550  |
| H | 4.510676  | 0.301637  | 1.968342  |
| H | 2.665117  | -4.549466 | -1.408285 |
| H | 1.624049  | -3.499751 | -0.456429 |
| H | 1.916633  | -3.117779 | -2.137860 |
| H | 8.186354  | -2.562119 | -1.525018 |
| H | 7.643601  | -4.141963 | -0.945341 |
| H | 7.257815  | -3.633404 | -2.590117 |
| H | 2.522892  | 1.553017  | -2.959195 |

|   |           |           |           |
|---|-----------|-----------|-----------|
| H | 3.252151  | 0.181205  | -2.123658 |
| H | 1.502182  | 0.281319  | -2.287360 |
| H | 3.133737  | 5.700734  | -0.859107 |
| H | 1.494194  | 5.792663  | -0.203861 |
| H | 2.881172  | 5.908911  | 0.886721  |
| H | 2.889833  | 0.743769  | 3.319639  |
| H | 2.330376  | 2.362255  | 3.712071  |
| H | 1.157251  | 1.118916  | 3.323297  |
| H | 1.001741  | -1.166426 | -0.677478 |
| H | -1.119604 | -1.383398 | -0.540155 |
| C | 1.996161  | -1.527836 | 2.206159  |
| C | -1.074507 | -0.729346 | 2.078083  |
| C | 1.437652  | -2.959774 | 2.283431  |
| C | -1.020685 | -2.179609 | 2.604285  |
| C | -0.038835 | -3.130273 | 1.894631  |
| H | 3.046812  | -1.528900 | 2.511809  |
| H | 1.457535  | -0.896129 | 2.902252  |
| H | 2.061475  | -3.638322 | 1.690560  |
| H | 1.567810  | -3.271745 | 3.329246  |
| H | -0.161499 | -3.038083 | 0.810960  |
| H | -0.319876 | -4.164735 | 2.129404  |
| H | -2.021881 | -2.614988 | 2.547628  |
| H | -0.768783 | -2.152994 | 3.675592  |
| H | -1.767898 | -0.178761 | 2.739177  |
| H | -0.127369 | -0.220989 | 2.240446  |

#### H<sub>4</sub>

E= -2572.4142556au

|   |           |           |           |
|---|-----------|-----------|-----------|
| C | -2.785595 | -3.164638 | 0.107831  |
| C | -3.200157 | -1.935554 | -0.470370 |
| C | -4.560689 | -1.783892 | -0.845066 |
| C | -5.451415 | -2.845680 | -0.645318 |
| C | -5.053765 | -4.062392 | -0.089014 |
| C | -3.716070 | -4.196716 | 0.282118  |
| P | -1.866579 | -0.626359 | -0.700879 |
| C | 1.361709  | -2.604914 | 3.604446  |
| O | 1.028476  | -3.157588 | 4.616808  |
| C | -5.128181 | -0.514322 | -1.441254 |
| C | -6.032551 | -5.199782 | 0.083623  |
| C | -1.363871 | -3.427528 | 0.565942  |
| B | 2.128206  | 0.616909  | -1.280618 |
| O | 0.702196  | -1.536410 | 3.102576  |
| C | 3.363507  | -0.228313 | -0.727970 |

|   |           |           |           |
|---|-----------|-----------|-----------|
| C | 3.275693  | -1.342046 | 0.098414  |
| C | 4.382040  | -2.067968 | 0.524431  |
| C | 5.652718  | -1.674982 | 0.107975  |
| C | 5.791097  | -0.566177 | -0.724737 |
| C | 4.651637  | 0.128310  | -1.124820 |
| F | 2.055262  | -1.757960 | 0.531743  |
| F | 4.814282  | 1.200535  | -1.928466 |
| F | 7.005144  | -0.180957 | -1.128187 |
| F | 6.728993  | -2.355492 | 0.505509  |
| F | 4.236628  | -3.127283 | 1.332351  |
| C | 1.513622  | 1.760162  | -0.396328 |
| C | 1.541768  | 1.752416  | 1.010569  |
| C | 0.955764  | 2.734788  | 1.799735  |
| C | 0.318491  | 3.809831  | 1.184101  |
| C | 0.274442  | 3.883240  | -0.204895 |
| C | 0.860464  | 2.873160  | -0.958878 |
| F | 2.125649  | 0.737433  | 1.679574  |
| F | 0.999259  | -2.659317 | 3.131227  |
| F | -0.242686 | 4.764858  | 1.922513  |
| F | -0.329972 | 4.914989  | -0.799161 |
| F | 0.792136  | 3.023278  | -2.293575 |
| C | -2.622542 | 1.011908  | -0.160019 |
| C | -2.848645 | 2.177820  | -0.940968 |
| C | -3.230701 | 3.370922  | -0.309317 |
| C | -3.407377 | 3.476528  | 1.069264  |
| C | -3.203847 | 2.322440  | 1.825714  |
| C | -2.810421 | 1.109009  | 1.251121  |
| C | -2.706269 | 2.260107  | -2.448720 |
| C | -3.767455 | 4.791420  | 1.718528  |
| C | -2.600984 | -0.057935 | 2.192884  |
| H | -6.492033 | -2.712431 | -0.935307 |
| H | -3.381357 | -5.130824 | 0.728622  |
| H | -3.346135 | 2.362118  | 2.903795  |
| H | -3.397443 | 4.250059  | -0.928414 |
| H | -6.160299 | -0.676687 | -1.767213 |
| H | -5.127918 | 0.309170  | -0.720493 |
| H | -4.559407 | -0.172630 | -2.311033 |
| H | -1.295819 | -4.415266 | 1.033088  |
| H | -0.650117 | -3.407037 | -0.264970 |
| H | -1.023316 | -2.687429 | 1.296441  |
| H | -7.047697 | -4.831236 | 0.266611  |
| H | -6.072833 | -5.828446 | -0.816331 |
| H | -5.750002 | -5.848180 | 0.919806  |

|   |           |           |           |
|---|-----------|-----------|-----------|
| H | -2.762326 | 0.254918  | 3.228711  |
| H | -3.287118 | -0.885477 | 1.984544  |
| H | -1.584516 | -0.463574 | 2.130105  |
| H | -4.350295 | 4.642024  | 2.633761  |
| H | -2.861706 | 5.347171  | 1.993813  |
| H | -4.349485 | 5.427929  | 1.043355  |
| H | -3.189645 | 1.430284  | -2.967092 |
| H | -3.164855 | 3.184087  | -2.813670 |
| H | -1.656909 | 2.284384  | -2.764561 |
| H | 1.135145  | -1.245391 | 2.280915  |
| H | 2.229301  | -2.909736 | 2.991406  |
| C | -1.665098 | -0.691384 | -2.584222 |
| C | 1.676885  | 0.344474  | -2.765845 |
| C | -0.859339 | -1.932650 | -3.030430 |
| C | 1.644643  | -1.124053 | -3.251477 |
| C | 0.611422  | -2.055536 | -2.580828 |
| H | -2.633884 | -0.715310 | -3.092144 |
| H | -1.156449 | 0.216470  | -2.906776 |
| H | -1.394553 | -2.829163 | -2.691370 |
| H | -0.890820 | -1.968838 | -4.129344 |
| H | 0.674961  | -1.953628 | -1.491547 |
| H | 0.919819  | -3.086294 | -2.803254 |
| H | 2.639596  | -1.562204 | -3.100050 |
| H | 1.476977  | -1.132381 | -4.337512 |
| H | 2.449776  | 0.873822  | -3.357449 |
| H | 0.745798  | 0.853649  | -3.014309 |

## I

E= -242 1.9670401au

|   |           |           |           |
|---|-----------|-----------|-----------|
| C | -4.484364 | -1.918813 | 1.882839  |
| C | -4.482554 | -1.413665 | 0.555026  |
| C | -5.598835 | -1.686551 | -0.276495 |
| C | -6.661683 | -2.448828 | 0.225962  |
| C | -6.669905 | -2.958987 | 1.524361  |
| C | -5.570121 | -2.677822 | 2.335898  |
| P | -2.953323 | -0.447433 | 0.028955  |
| C | -5.736960 | -1.174237 | -1.694503 |
| C | -7.816032 | -3.805908 | 2.025560  |
| C | -3.353889 | -1.667985 | 2.863474  |
| B | 2.723665  | 0.018611  | -0.282816 |
| C | 4.102875  | -0.747071 | -0.484110 |
| C | 4.594725  | -1.720370 | 0.379972  |
| C | 5.785346  | -2.402020 | 0.146877  |

|   |           |           |           |
|---|-----------|-----------|-----------|
| C | 6.526556  | -2.103857 | -0.995784 |
| C | 6.069289  | -1.135279 | -1.886736 |
| C | 4.870256  | -0.481457 | -1.615215 |
| F | 3.898464  | -2.024603 | 1.494962  |
| F | 4.440218  | 0.452585  | -2.492254 |
| F | 6.777368  | -0.846157 | -2.984560 |
| F | 7.672975  | -2.746653 | -1.236004 |
| F | 6.223370  | -3.332295 | 1.002722  |
| C | 2.691437  | 1.334048  | 0.577715  |
| C | 3.604578  | 1.594690  | 1.617082  |
| C | 3.576897  | 2.754723  | 2.384624  |
| C | 2.620531  | 3.730433  | 2.114101  |
| C | 1.700807  | 3.532056  | 1.087102  |
| C | 1.745046  | 2.351724  | 0.352237  |
| F | 4.547431  | 0.698747  | 1.942358  |
| F | 4.456193  | 2.941080  | 3.374058  |
| F | 2.586288  | 4.849800  | 2.834167  |
| F | 0.791582  | 4.473092  | 0.816943  |
| F | 0.843881  | 2.238720  | -0.634639 |
| C | -3.618620 | 1.039715  | -0.915121 |
| C | -3.364110 | 1.401247  | -2.264631 |
| C | -3.872143 | 2.607566  | -2.765127 |
| C | -4.617366 | 3.495505  | -1.990622 |
| C | -4.833012 | 3.148760  | -0.658109 |
| C | -4.341044 | 1.961705  | -0.104521 |
| C | -2.549952 | 0.575232  | -3.240549 |
| C | -5.131463 | 4.796855  | -2.559583 |
| C | -4.606329 | 1.730520  | 1.368449  |
| H | -7.511190 | -2.648089 | -0.424819 |
| H | -5.554159 | -3.055741 | 3.356405  |
| H | -5.394853 | 3.825737  | -0.017151 |
| H | -3.674895 | 2.857140  | -3.806005 |
| H | -6.541856 | -1.706084 | -2.212071 |
| H | -5.974690 | -0.105264 | -1.715913 |
| H | -4.823376 | -1.303220 | -2.279575 |
| H | -2.406298 | -2.103363 | 2.528748  |
| H | -3.169742 | -0.598745 | 3.010902  |
| H | -3.594585 | -2.107711 | 3.836918  |
| H | -8.749645 | -3.565550 | 1.505818  |
| H | -7.619790 | -4.874689 | 1.864726  |
| H | -7.978826 | -3.665555 | 3.099782  |
| H | -5.011191 | 2.637260  | 1.828586  |
| H | -5.321497 | 0.919213  | 1.542033  |

|   |           |           |           |
|---|-----------|-----------|-----------|
| H | -3.686104 | 1.464055  | 1.902803  |
| H | -6.070712 | 5.098952  | -2.083472 |
| H | -4.412226 | 5.612439  | -2.403686 |
| H | -5.306852 | 4.721418  | -3.638269 |
| H | -2.939661 | -0.437979 | -3.371249 |
| H | -2.550751 | 1.052774  | -4.224980 |
| H | -1.502902 | 0.487434  | -2.928774 |
| C | -2.185381 | -1.718833 | -1.152574 |
| C | 1.460853  | -0.487951 | -1.075759 |
| C | -1.612215 | -2.923152 | -0.370858 |
| C | 1.346366  | -1.988290 | -1.415341 |
| C | -0.352940 | -2.648280 | 0.483175  |
| H | -2.911323 | -2.085365 | -1.884261 |
| H | -1.384076 | -1.224826 | -1.703472 |
| H | 1.546712  | 0.079332  | -2.024485 |
| H | 0.531600  | -0.120529 | -0.629037 |
| C | 0.999134  | -2.892423 | -0.217017 |
| H | -2.405077 | -3.331875 | 0.267021  |
| H | -1.384175 | -3.717028 | -1.096718 |
| H | -0.397290 | -1.628227 | 0.886373  |
| H | -0.377134 | -3.310463 | 1.358745  |
| H | 1.024847  | -3.936737 | -0.560170 |
| H | 1.793514  | -2.804577 | 0.535638  |
| H | 0.593400  | -2.123487 | -2.202613 |
| H | 2.291738  | -2.339069 | -1.848583 |

## I<sub>1</sub>

E= -2423.1430285au

|   |           |           |           |
|---|-----------|-----------|-----------|
| C | -4.732555 | -2.107528 | 1.719327  |
| C | -4.623395 | -1.454415 | 0.463703  |
| C | -5.645344 | -1.654781 | -0.500311 |
| C | -6.721632 | -2.497159 | -0.194544 |
| C | -6.833931 | -3.155155 | 1.031517  |
| C | -5.828506 | -2.941485 | 1.974501  |
| P | -3.079855 | -0.407644 | 0.192880  |
| C | -5.666778 | -0.978826 | -1.855077 |
| C | -7.991019 | -4.083871 | 1.315704  |
| C | -3.711189 | -1.939106 | 2.828690  |
| B | 2.803917  | -0.011919 | -0.328938 |
| C | 4.134093  | -0.873593 | -0.449208 |
| C | 4.564654  | -1.778240 | 0.516181  |
| C | 5.708856  | -2.554928 | 0.362788  |
| C | 6.465005  | -2.427825 | -0.801898 |

|   |           |           |           |
|---|-----------|-----------|-----------|
| C | 6.068094  | -1.533174 | -1.793437 |
| C | 4.913503  | -0.779230 | -1.598790 |
| F | 3.850821  | -1.915875 | 1.653044  |
| F | 4.541044  | 0.080853  | -2.572284 |
| F | 6.790741  | -1.407951 | -2.912490 |
| F | 7.567811  | -3.163813 | -0.966438 |
| F | 6.089043  | -3.414454 | 1.314794  |
| C | 2.847046  | 1.384270  | 0.392665  |
| C | 3.801573  | 1.710826  | 1.375055  |
| C | 3.843086  | 2.942798  | 2.020189  |
| C | 2.916196  | 3.924610  | 1.678965  |
| C | 1.956453  | 3.661424  | 0.704417  |
| C | 1.932485  | 2.412346  | 0.092972  |
| F | 4.720319  | 0.815335  | 1.763414  |
| F | 4.761031  | 3.192454  | 2.958994  |
| F | 2.948108  | 5.111175  | 2.281473  |
| F | 1.074313  | 4.606217  | 0.366683  |
| F | 0.992283  | 2.239008  | -0.849505 |
| C | -3.695182 | 1.163230  | -0.641989 |
| C | -3.294424 | 1.689262  | -1.898785 |
| C | -3.788825 | 2.931053  | -2.318341 |
| C | -4.657660 | 3.700947  | -1.545636 |
| C | -5.014383 | 3.194708  | -0.297508 |
| C | -4.543359 | 1.964229  | 0.174422  |
| C | -2.328563 | 1.008464  | -2.847413 |
| C | -5.153093 | 5.045652  | -2.022841 |
| C | -4.969225 | 1.558231  | 1.569984  |
| H | -7.497918 | -2.641324 | -0.944084 |
| H | -5.896194 | -3.434286 | 2.942397  |
| H | -5.674364 | 3.776737  | 0.343112  |
| H | -3.478138 | 3.307207  | -3.291365 |
| H | -6.406850 | -1.456997 | -2.504767 |
| H | -5.929739 | 0.080952  | -1.770788 |
| H | -4.700753 | -1.020631 | -2.364486 |
| H | -2.719436 | -2.306282 | 2.543711  |
| H | -3.583664 | -0.888841 | 3.110490  |
| H | -4.026005 | -2.492671 | 3.719365  |
| H | -8.917008 | -3.725682 | 0.852405  |
| H | -7.799031 | -5.089819 | 0.918497  |
| H | -8.167236 | -4.187157 | 2.391602  |
| H | -5.442764 | 2.401738  | 2.081970  |
| H | -5.682287 | 0.726858  | 1.565517  |
| H | -4.110941 | 1.239198  | 2.173751  |



|   |           |           |           |   |           |           |           |
|---|-----------|-----------|-----------|---|-----------|-----------|-----------|
| H | -6.122758 | 5.295598  | -1.578957 | C | -5.759146 | -1.060618 | -1.049173 |
| H | -4.454183 | 5.848112  | -1.750174 | C | -5.542910 | 0.248856  | -0.630249 |
| H | -5.262588 | 5.069278  | -3.112721 | C | -4.324028 | 0.580451  | -0.044644 |
| H | -2.648885 | 0.002965  | -3.133056 | F | -2.640970 | -2.620616 | -0.120143 |
| H | -2.233822 | 1.593372  | -3.767281 | F | -4.171565 | 1.860296  | 0.360873  |
| H | -1.323846 | 0.927184  | -2.415724 | F | -6.503789 | 1.169789  | -0.789112 |
| C | -2.186613 | -1.543922 | -1.039565 | F | -6.921738 | -1.405956 | -1.614945 |
| C | 1.505240  | -0.521465 | -1.058746 | F | -4.958867 | -3.274984 | -1.263333 |
| C | -1.636990 | -2.798588 | -0.322500 | C | -1.231698 | 1.450730  | 0.227551  |
| C | 1.329001  | -2.030569 | -1.318232 | C | -0.966612 | 1.516722  | -1.146978 |
| C | -0.404532 | -2.559997 | 0.582302  | C | -0.338878 | 2.594293  | -1.762385 |
| H | -2.848565 | -1.853881 | -1.853754 | C | 0.051958  | 3.685917  | -0.993750 |
| H | -1.358054 | -0.989112 | -1.480621 | C | -0.194478 | 3.678542  | 0.374481  |
| H | 1.571800  | -0.002558 | -2.035856 | C | -0.819955 | 2.576020  | 0.951732  |
| H | 0.605187  | -0.100338 | -0.599099 | F | -1.269342 | 0.469911  | -1.944687 |
| C | 0.958767  | -2.859890 | -0.074580 | F | -0.069611 | 2.571852  | -3.076620 |
| H | -2.445032 | -3.257418 | 0.259246  | F | 0.680865  | 4.720226  | -1.560924 |
| H | -1.378827 | -3.539746 | -1.092408 | F | 0.187009  | 4.720700  | 1.125960  |
| H | -0.427191 | -1.532934 | 0.969721  | F | -1.006219 | 2.641822  | 2.287556  |
| H | -0.479983 | -3.205896 | 1.466589  | C | 2.546984  | 0.848703  | 0.249067  |
| H | 0.974696  | -3.921821 | -0.358824 | C | 2.889738  | 1.742728  | 1.299863  |
| H | 1.741887  | -2.739476 | 0.685468  | C | 3.517102  | 2.953486  | 0.985651  |
| H | 0.560221  | -2.175704 | -2.088489 | C | 3.820010  | 3.334153  | -0.323171 |
| H | 2.254117  | -2.438944 | -1.744622 | C | 3.444243  | 2.463895  | -1.344300 |
| H | -0.603106 | 1.316188  | 3.223992  | C | 2.803602  | 1.244484  | -1.093511 |
| H | -1.031226 | 0.994040  | 2.707678  | C | 2.591065  | 1.506615  | 2.766330  |

## TS<sub>112</sub>

E= -2423.1022492au

|   |           |           |           |   |           |           |           |
|---|-----------|-----------|-----------|---|-----------|-----------|-----------|
| C | 2.074595  | -3.011453 | -1.228491 | H | 5.838091  | -3.417784 | -0.367562 |
| C | 2.692695  | -2.103366 | -0.330699 | H | 2.352370  | -4.739687 | -2.467050 |
| C | 4.070278  | -2.253123 | -0.027127 | H | 3.634252  | 2.744430  | -2.377766 |
| C | 4.781964  | -3.310108 | -0.606362 | H | 3.771562  | 3.626987  | 1.801177  |
| C | 4.187011  | -4.224118 | -1.477972 | H | 5.816474  | -1.738146 | 1.121334  |
| C | 2.835285  | -4.049930 | -1.778215 | H | 5.018736  | -0.344071 | 0.380146  |
| P | 1.630680  | -0.769125 | 0.429351  | H | 4.324431  | -1.093523 | 1.808210  |
| C | 4.842394  | -1.308024 | 0.869334  | H | 0.345653  | -1.919254 | -2.000650 |
| C | 4.973901  | -5.373447 | -2.061335 | H | 0.409152  | -3.625795 | -2.446121 |
| C | 0.618715  | -2.916263 | -1.640055 | H | -0.068444 | -3.149007 | -0.819622 |
| B | -1.936049 | 0.168986  | 0.879568  | H | 6.036896  | -5.127023 | -2.153380 |
| C | -3.283712 | -0.332400 | 0.154310  | H | 4.899866  | -6.265036 | -1.424308 |
| C | -3.555941 | -1.635275 | -0.268957 | H | 4.600927  | -5.651842 | -3.052659 |
| C | -4.757874 | -2.009651 | -0.866779 | H | 2.500711  | 1.019405  | -3.210678 |
|   |           |           |           | H | 3.012625  | -0.476699 | -2.416116 |

|   |           |           |           |
|---|-----------|-----------|-----------|
| H | 1.353692  | 0.099803  | -2.245673 |
| H | 5.587322  | 4.581608  | -0.370162 |
| H | 4.435061  | 4.910461  | -1.671458 |
| H | 4.095803  | 5.459081  | -0.021143 |
| H | 3.003624  | 0.566312  | 3.140966  |
| H | 3.023362  | 2.311531  | 3.367295  |
| H | 1.513199  | 1.506298  | 2.966185  |
| H | 0.036047  | -0.892355 | 0.162421  |
| H | -0.805686 | -1.068574 | 0.168025  |
| C | 1.470020  | -1.372408 | 2.200122  |
| C | -1.805765 | -0.088165 | 2.449964  |
| C | 0.669608  | -2.694239 | 2.226797  |
| C | -2.094908 | -1.505631 | 3.028126  |
| C | -1.054495 | -1.982342 | 4.078355  |
| C | -0.004833 | -3.001635 | 3.576526  |
| H | 0.935502  | -0.602694 | 2.754107  |
| H | 2.442713  | -1.508049 | 2.679852  |
| H | -0.111156 | -2.681098 | 1.461065  |
| H | 1.338993  | -3.521195 | 1.963140  |
| H | -0.493064 | -3.980122 | 3.468965  |
| H | 0.761549  | -3.130483 | 4.354262  |
| H | -0.548225 | -1.105815 | 4.505157  |
| H | -1.570356 | -2.454786 | 4.924245  |
| H | -3.085243 | -1.497270 | 3.497900  |
| H | -2.164983 | -2.248286 | 2.226301  |
| H | -0.830000 | 0.261731  | 2.801342  |
| H | -2.503814 | 0.627845  | 2.913933  |

## I<sub>2</sub>

E= -2423.1341229au

|   |           |           |           |
|---|-----------|-----------|-----------|
| C | -3.341257 | -2.351650 | 1.258009  |
| C | -3.622205 | -1.492061 | 0.162173  |
| C | -4.963768 | -1.257021 | -0.237316 |
| C | -5.994489 | -1.880696 | 0.468857  |
| C | -5.747949 | -2.730336 | 1.550384  |
| C | -4.420139 | -2.945799 | 1.923174  |
| P | -2.254101 | -0.684766 | -0.756625 |
| C | -5.341439 | -0.357144 | -1.394804 |
| C | -6.881051 | -3.412068 | 2.277343  |
| C | -1.949101 | -2.682834 | 1.756038  |
| B | 1.663025  | -0.363495 | -0.436748 |
| C | 3.166683  | -0.950589 | -0.130729 |
| C | 3.393816  | -2.182919 | 0.485548  |

|   |           |           |           |
|---|-----------|-----------|-----------|
| C | 4.662065  | -2.685889 | 0.774423  |
| C | 5.785478  | -1.937676 | 0.440353  |
| C | 5.618468  | -0.704348 | -0.182289 |
| C | 4.330341  | -0.246635 | -0.451335 |
| F | 2.356028  | -2.986972 | 0.826234  |
| F | 4.240382  | 0.958827  | -1.058083 |
| F | 6.697246  | 0.026082  | -0.514352 |
| F | 7.016052  | -2.402338 | 0.708967  |
| F | 4.811438  | -3.884232 | 1.367907  |
| C | 1.474499  | 1.105206  | 0.316753  |
| C | 1.068712  | 1.148704  | 1.655102  |
| C | 0.823445  | 2.317082  | 2.372917  |
| C | 0.991204  | 3.545537  | 1.746484  |
| C | 1.407464  | 3.568956  | 0.421966  |
| C | 1.642982  | 2.371886  | -0.255511 |
| F | 0.820506  | -0.002093 | 2.335409  |
| F | 0.367067  | 2.269226  | 3.640516  |
| F | 0.710633  | 4.689580  | 2.394770  |
| F | 1.531838  | 4.755610  | -0.208097 |
| F | 2.020021  | 2.515410  | -1.543053 |
| C | -2.382255 | 1.149000  | -0.823700 |
| C | -2.392313 | 1.909137  | -2.021425 |
| C | -2.292153 | 3.301799  | -1.924738 |
| C | -2.178786 | 3.968509  | -0.705368 |
| C | -2.235973 | 3.201890  | 0.460670  |
| C | -2.331055 | 1.809954  | 0.437692  |
| C | -2.479965 | 1.338897  | -3.421343 |
| C | -1.946925 | 5.456485  | -0.639302 |
| C | -2.366410 | 1.091624  | 1.769139  |
| H | -7.021337 | -1.693439 | 0.163828  |
| H | -4.208094 | -3.599048 | 2.765819  |
| H | -2.170643 | 3.699783  | 1.424556  |
| H | -2.280030 | 3.880544  | -2.844880 |
| H | -6.429075 | -0.290086 | -1.482898 |
| H | -4.954242 | 0.659238  | -1.272376 |
| H | -4.968703 | -0.738789 | -2.353499 |
| H | -1.377101 | -3.259082 | 1.021906  |
| H | -1.349042 | -1.801915 | 2.004862  |
| H | -2.014813 | -3.291841 | 2.661316  |
| H | -7.790469 | -2.802686 | 2.263829  |
| H | -7.124801 | -4.372772 | 1.804825  |
| H | -6.621352 | -3.618550 | 3.320378  |
| H | -2.247516 | 1.809654  | 2.584037  |

|   |           |           |           |
|---|-----------|-----------|-----------|
| H | -3.310238 | 0.558616  | 1.923732  |
| H | -1.548260 | 0.373445  | 1.880752  |
| H | -2.496928 | 5.914657  | 0.189615  |
| H | -0.879905 | 5.653371  | -0.474461 |
| H | -2.240380 | 5.954433  | -1.568524 |
| H | -3.234904 | 0.554688  | -3.519498 |
| H | -2.746774 | 2.132260  | -4.124638 |
| H | -1.518142 | 0.930804  | -3.752171 |
| C | -2.002121 | -1.582197 | -2.361998 |
| C | 1.270235  | -0.303660 | -2.034836 |
| C | -1.547091 | -3.047667 | -2.178211 |
| C | 1.367696  | -1.575821 | -2.922525 |
| C | -0.172617 | -3.277399 | -1.523768 |
| H | -2.947099 | -1.553086 | -2.911174 |
| H | -1.261281 | -1.020770 | -2.928492 |
| H | 1.865135  | 0.460317  | -2.546286 |
| H | 0.241203  | 0.097610  | -2.085712 |
| C | 1.099090  | -2.984520 | -2.342258 |
| H | -2.316664 | -3.584982 | -1.608259 |
| H | -1.554752 | -3.492086 | -3.183109 |
| H | -0.096790 | -2.727365 | -0.583582 |
| H | -0.134547 | -4.340052 | -1.246689 |
| H | 1.142857  | -3.696330 | -3.181239 |
| H | 1.931119  | -3.249264 | -1.681792 |
| H | 0.740318  | -1.440015 | -3.820310 |
| H | 2.391480  | -1.627170 | -3.317900 |
| H | 0.872040  | -1.098575 | 0.138905  |
| H | -1.063482 | -0.918894 | -0.033155 |

### I<sub>3</sub>

E= -2611.7194462au

|   |           |           |           |
|---|-----------|-----------|-----------|
| C | -3.642947 | -2.400536 | 0.883762  |
| C | -3.877947 | -1.392677 | -0.090238 |
| C | -5.203654 | -1.063853 | -0.474390 |
| C | -6.265292 | -1.744207 | 0.126304  |
| C | -6.064398 | -2.739241 | 1.086026  |
| C | -4.750485 | -3.045316 | 1.445848  |
| P | -2.464733 | -0.523650 | -0.875737 |
| C | 1.772343  | -2.581482 | 3.050942  |
| O | 2.858645  | -2.208987 | 3.261009  |
| C | -5.532281 | -0.008261 | -1.507777 |
| C | -7.229474 | -3.477326 | 1.698276  |
| C | -2.269916 | -2.822730 | 1.361742  |

|   |           |           |           |
|---|-----------|-----------|-----------|
| B | 1.577120  | -0.142581 | -0.669648 |
| O | 0.681000  | -2.973273 | 2.885803  |
| C | 3.111278  | -0.720371 | -0.535751 |
| C | 3.410902  | -1.985952 | -0.031530 |
| C | 4.703044  | -2.489646 | 0.106211  |
| C | 5.782548  | -1.704888 | -0.283379 |
| C | 5.545167  | -0.434680 | -0.800819 |
| C | 4.233737  | 0.021518  | -0.914076 |
| F | 2.414016  | -2.828375 | 0.357692  |
| F | 4.076527  | 1.264853  | -1.422059 |
| F | 6.580357  | 0.332308  | -1.183957 |
| F | 7.037129  | -2.167296 | -0.166004 |
| F | 4.915392  | -3.721384 | 0.602119  |
| C | 1.431460  | 1.254991  | 0.218481  |
| C | 1.121927  | 1.181072  | 1.580284  |
| C | 0.922433  | 2.278193  | 2.414745  |
| C | 1.043731  | 3.558096  | 1.888436  |
| C | 1.363808  | -3.699474 | 0.544599  |
| C | 1.552308  | 2.568600  | -0.251096 |
| F | 0.922507  | -0.027636 | 2.176351  |
| F | 0.560825  | 2.113727  | 3.702174  |
| F | 0.811036  | 4.639121  | 2.652874  |
| F | 1.440551  | 4.937503  | 0.013488  |
| F | 1.833271  | 2.828718  | -1.544755 |
| C | -2.518808 | 1.304385  | -0.713280 |
| C | -2.567945 | 2.206578  | -1.806311 |
| C | -2.448761 | 3.575461  | -1.542406 |
| C | -2.277335 | 4.084086  | -0.255012 |
| C | -2.282010 | 3.177640  | 0.807938  |
| C | -2.390478 | 1.799798  | 0.616419  |
| C | -2.705144 | 1.809528  | -3.260659 |
| C | -2.039903 | 5.553221  | -0.014927 |
| C | -2.342747 | 0.915980  | 1.844111  |
| H | -7.280215 | -1.485763 | -0.166191 |
| H | -4.572719 | -3.813015 | 2.194740  |
| H | -2.166427 | 3.551087  | 1.822028  |
| H | -2.469426 | 4.264381  | -2.383087 |
| H | -6.615479 | 0.097376  | -1.610840 |
| H | -5.125771 | 0.972838  | -1.242578 |
| H | -5.143339 | -0.269485 | -2.499637 |
| H | -1.651879 | -3.235079 | 0.558238  |
| H | -1.701727 | -2.003369 | 1.812508  |
| H | -2.360149 | -3.599289 | 2.125061  |

|   |           |           |           |   |           |           |           |
|---|-----------|-----------|-----------|---|-----------|-----------|-----------|
| H | -8.141641 | -2.872620 | 1.680428  | O | -1.539262 | -2.343722 | -2.462030 |
| H | -7.438559 | -4.402716 | 1.145474  | C | 5.053968  | 0.214259  | 1.342050  |
| H | -7.024069 | -3.758878 | 2.736097  | C | 7.514814  | -2.873248 | -1.700511 |
| H | -2.261171 | 1.531759  | 2.743338  | C | 2.538406  | -3.159044 | -1.742798 |
| H | -3.238246 | 0.293930  | 1.945511  | B | -1.673079 | -0.316258 | 0.504717  |
| H | -1.466470 | 0.258402  | 1.847221  | O | 0.369948  | -1.212142 | -1.963906 |
| H | -2.530571 | 5.896560  | 0.901950  | C | -3.223494 | -0.744695 | 0.268910  |
| H | -0.964280 | 5.738242  | 0.098487  | C | -3.667433 | -2.047418 | 0.015294  |
| H | -2.397707 | 6.163131  | -0.850146 | C | -5.006307 | -2.391665 | -0.155084 |
| H | -3.449915 | 1.027671  | -3.426716 | C | -5.983704 | -1.407988 | -0.050006 |
| H | -3.010254 | 2.676681  | -3.852558 | C | -5.602261 | -0.099758 | 0.228517  |
| H | -1.749742 | 1.462805  | -3.671224 | C | -4.251356 | 0.201870  | 0.381102  |
| H | -1.311117 | -0.883670 | -0.152025 | F | -2.786149 | -3.061548 | -0.073861 |
| H | 0.838080  | -0.938723 | -0.108561 | F | -3.969034 | 1.487671  | 0.685265  |
| C | -2.195901 | -1.235432 | -2.567923 | F | -6.533471 | 0.855447  | 0.356600  |
| C | 1.074450  | 0.046676  | -2.226374 | F | -7.275301 | -1.717699 | -0.199678 |
| C | -1.716573 | -2.704583 | -2.530362 | F | -5.358019 | -3.659253 | -0.404419 |
| C | 1.153511  | -1.141994 | -3.221898 | C | -1.327446 | 1.121052  | -0.137877 |
| C | -0.325578 | -2.971828 | -1.926382 | C | -1.612305 | 1.432322  | -1.476809 |
| H | -3.144330 | -1.166904 | -3.108613 | C | -1.463407 | 2.700576  | -2.032006 |
| H | -1.466697 | -0.605354 | -3.073789 | C | -1.069712 | 3.758643  | -1.220240 |
| H | 1.608943  | 0.871765  | -2.708798 | C | -0.834748 | 3.522441  | 0.128170  |
| H | 0.032234  | 0.409068  | -2.171357 | C | -0.956225 | 2.231837  | 0.633623  |
| C | 0.920502  | -2.596473 | -2.750921 | F | -2.083864 | 0.487323  | -2.304886 |
| H | -2.468137 | -3.305317 | -2.001052 | F | -1.726751 | 2.914110  | -3.326596 |
| H | -1.736496 | -3.053496 | -3.572023 | F | -0.930745 | 4.987992  | -1.725327 |
| H | -0.230461 | -2.504105 | -0.943121 | F | -0.490282 | 4.540598  | 0.933309  |
| H | -0.270641 | -4.053491 | -1.741185 | F | -0.747645 | 2.119730  | 1.963408  |
| H | 0.948342  | -3.238140 | -3.645286 | C | 2.213873  | 1.076914  | 0.636154  |
| H | 1.774414  | -2.901794 | -2.137494 | C | 2.199740  | 1.796415  | 1.861530  |
| H | 0.492664  | -0.940429 | -4.082974 | C | 2.398394  | 3.181258  | 1.833288  |
| H | 2.163270  | -1.145112 | -3.655028 | C | 2.612104  | 3.893636  | 0.653794  |

### TS134

E= -2611.65799au

|   |           |           |           |   |          |           |           |
|---|-----------|-----------|-----------|---|----------|-----------|-----------|
| C | 3.741328  | -2.447237 | -1.161978 | C | 2.759375 | 5.394370  | 0.662078  |
| C | 3.689145  | -1.390305 | -0.208212 | C | 2.507054 | 1.132903  | -1.946540 |
| C | 4.917085  | -0.861884 | 0.282866  | H | 7.054020 | -0.927729 | 0.159689  |
| C | 6.128315  | -1.351011 | -0.223749 | H | 5.001204 | -3.698079 | -2.356167 |
| C | 6.193537  | -2.355490 | -1.185609 | H | 2.812727 | 3.692824  | -1.472683 |
| C | 4.986028  | -2.893344 | -1.624572 | H | 2.376891 | 3.722784  | 2.775826  |
| P | 2.014448  | -0.765765 | 0.438514  | H | 6.077772 | 0.216806  | 1.727746  |
| C | -0.793240 | -1.693169 | -1.774594 | H | 4.846825 | 1.213845  | 0.948740  |

|   |           |           |           |   |           |           |           |
|---|-----------|-----------|-----------|---|-----------|-----------|-----------|
| H | 4.391561  | 0.061498  | 2.196566  | C | -5.988688 | -4.254048 | 0.340975  |
| H | 1.799027  | -3.436582 | -0.988079 | C | -4.976045 | -4.020906 | 1.273024  |
| H | 2.012685  | -2.546201 | -2.478424 | P | -3.134255 | -0.512102 | 0.087990  |
| H | 2.859054  | -4.082811 | -2.232846 | C | -0.779578 | 1.785726  | 1.965243  |
| H | 8.334491  | -2.188393 | -1.461551 | O | 0.048708  | 2.490164  | 2.489582  |
| H | 7.757495  | -3.847417 | -1.256168 | C | -5.663189 | -1.228420 | -1.932896 |
| H | 7.492745  | -3.011927 | -2.787227 | C | -6.855068 | -5.488612 | 0.421723  |
| H | 2.633811  | 1.900189  | -2.715453 | C | -3.082874 | -2.747308 | 2.277670  |
| H | 3.354972  | 0.444259  | -2.027941 | B | 3.299460  | -0.125048 | -1.024756 |
| H | 1.604711  | 0.567124  | -2.193085 | O | -1.220689 | 0.638474  | 2.493825  |
| H | 3.351156  | 5.746853  | -0.188891 | C | 4.670261  | -0.742802 | -0.503260 |
| H | 1.771172  | 5.866945  | 0.598962  | C | 4.869553  | -1.099564 | 0.830018  |
| H | 3.234662  | 5.748166  | 1.583052  | C | 6.032112  | -1.711684 | 1.285714  |
| H | 2.715047  | 0.408141  | 3.472399  | C | 7.060384  | -1.972184 | 0.380781  |
| H | 2.106609  | 1.971271  | 3.997152  | C | 6.908372  | -1.624906 | -0.959306 |
| H | 0.988240  | 0.779638  | 3.356742  | C | 5.720287  | -1.028047 | -1.374800 |
| H | 1.002357  | -1.028307 | -0.754303 | F | 3.893487  | -0.855033 | 1.728983  |
| H | -1.162347 | -1.419692 | -0.680919 | F | 5.611240  | -0.698319 | -2.679954 |
| C | 2.003453  | -1.749142 | 2.056197  | F | 7.895664  | -1.867181 | -1.829889 |
| C | -1.066914 | -0.695248 | 1.915234  | F | 8.187724  | -2.554154 | 0.798720  |
| C | 1.682143  | -3.241008 | 1.856042  | F | 6.174433  | -2.048404 | 2.572464  |
| C | -1.306103 | -1.977595 | 2.750519  | C | 2.861722  | 1.318194  | -0.582827 |
| C | 0.286629  | -3.574712 | 1.308863  | C | 3.670343  | 2.143338  | 0.231343  |
| H | 3.019730  | -1.654172 | 2.449437  | C | 3.278199  | 3.392599  | 0.702377  |
| H | 1.330472  | -1.314492 | 2.787189  | C | 2.020771  | 3.887963  | 0.372792  |
| H | -1.560307 | 0.100181  | 2.501221  | C | 1.188767  | 3.133444  | -0.448598 |
| H | -0.024313 | -0.394068 | 1.960660  | C | 1.615121  | 1.896988  | -0.910035 |
| C | -0.916663 | -3.392053 | 2.246924  | F | 4.900094  | 1.758579  | 0.596850  |
| H | 2.444124  | -3.682202 | 1.203194  | F | 4.097116  | 4.115632  | 1.470452  |
| H | 1.812359  | -3.723358 | 2.835199  | F | 1.625364  | 5.070581  | 0.822480  |
| H | 0.105074  | -3.021583 | 0.381184  | F | -0.033853 | 3.585343  | -0.761050 |
| H | 0.299592  | -4.631941 | 1.012681  | F | 0.723025  | 1.257934  | -1.695789 |
| H | -0.762805 | -4.021081 | 3.135646  | C | -4.173184 | 1.013868  | -0.257797 |
| H | -1.773612 | -3.820802 | 1.725203  | C | -4.065166 | 1.903421  | -1.359473 |
| H | -0.802103 | -1.803087 | 3.712343  | C | -4.882118 | 3.041223  | -1.405147 |
| H | -2.373616 | -2.019021 | 3.001921  | C | -5.797824 | 3.358409  | -0.403167 |

#### I<sub>4</sub>

E= -2611.7318037au

|   |           |           |           |   |           |           |           |
|---|-----------|-----------|-----------|---|-----------|-----------|-----------|
| C | -4.142273 | -2.898919 | 1.203032  | C | -5.067651 | 1.355581  | 0.797671  |
| C | -4.321067 | -1.960649 | 0.152982  | C | -3.093707 | 1.743539  | -2.512372 |
| C | -5.350831 | -2.179234 | -0.797174 | C | -6.646666 | 4.605088  | -0.479340 |
| C | -6.157100 | -3.318467 | -0.680582 | C | -5.192728 | 0.546087  | 2.072376  |
|   |           |           |           | H | -6.944643 | -3.474601 | -1.415341 |
|   |           |           |           | H | -4.828203 | -4.730523 | 2.084564  |

|   |           |           |           |   |           |           |           |
|---|-----------|-----------|-----------|---|-----------|-----------|-----------|
| H | -6.553038 | 2.727369  | 1.504934  | C | 2.838942  | -2.178883 | -0.319948 |
| H | -4.792644 | 3.704002  | -2.263461 | C | 4.239422  | -1.975643 | -0.443463 |
| H | -6.300947 | -1.720912 | -2.673670 | C | 5.088003  | -3.090119 | -0.510260 |
| H | -6.191863 | -0.337429 | -1.576912 | H | 6.158549  | -2.915247 | -0.597464 |
| H | -4.767181 | -0.875052 | -2.449148 | C | 4.622871  | -4.403604 | -0.477123 |
| H | -2.067444 | -2.770507 | 1.867885  | C | 3.242749  | -4.588867 | -0.414293 |
| H | -3.181146 | -1.804804 | 2.826793  | H | 2.839826  | -5.599909 | -0.430357 |
| H | -3.160635 | -3.563126 | 3.003037  | C | 2.348131  | -3.515717 | -0.350841 |
| H | -7.832183 | -5.323978 | -0.044303 | C | 4.918770  | -0.623713 | -0.539061 |
| H | -6.385367 | -6.335933 | -0.095728 | H | 4.828471  | -0.039852 | 0.380369  |
| H | -7.020287 | -5.795427 | 1.460154  | H | 4.513020  | -0.006129 | -1.344941 |
| H | -5.856522 | 1.053933  | 2.778240  | H | 5.986344  | -0.762780 | -0.736294 |
| H | -5.594659 | -0.457434 | 1.898924  | C | 5.573154  | -5.576906 | -0.511506 |
| H | -4.220559 | 0.425513  | 2.567039  | H | 5.150531  | -6.419539 | -1.070186 |
| H | -7.621344 | 4.456526  | -0.002013 | H | 5.794397  | -5.939808 | 0.501502  |
| H | -6.160593 | 5.447281  | 0.031233  | H | 6.527734  | -5.306703 | -0.975512 |
| H | -6.819145 | 4.909925  | -1.516998 | C | 0.871977  | -3.852264 | -0.341329 |
| H | -3.167154 | 0.770031  | -3.003862 | H | 0.303676  | -3.216554 | -1.029855 |
| H | -3.292342 | 2.504920  | -3.272393 | H | 0.418587  | -3.721830 | 0.646212  |
| H | -2.053510 | 1.880102  | -2.191858 | H | 0.720248  | -4.894583 | -0.639394 |
| H | -1.838513 | 0.202074  | 1.845769  | C | 2.254528  | 0.840203  | -0.129526 |
| H | -1.242432 | 2.031227  | 0.990571  | C | 2.739092  | 1.434607  | 1.060924  |
| C | -2.077040 | -1.010570 | -1.395466 | C | 3.123859  | 2.781755  | 1.048005  |
| C | 2.474414  | -1.070492 | -1.987320 | H | 3.486877  | 3.228706  | 1.971530  |
| C | -1.052391 | -2.112364 | -1.044706 | C | 3.061162  | 3.566021  | -0.104952 |
| C | 2.143954  | -2.480876 | -1.417775 | C | 2.628971  | 2.953057  | -1.283730 |
| C | 0.056037  | -1.646286 | -0.084409 | H | 2.597006  | 3.534935  | -2.202912 |
| H | -2.707473 | -1.345475 | -2.224915 | C | 2.216936  | 1.616215  | -1.318508 |
| H | -1.522736 | -0.132699 | -1.730322 | C | 2.888615  | 0.681245  | 2.364616  |
| H | 3.132723  | -1.229926 | -2.857757 | H | 3.592838  | 1.199638  | 3.023716  |
| H | 1.567012  | -0.609462 | -2.374820 | H | 3.258611  | -0.337221 | 2.210587  |
| C | 1.338306  | -2.495477 | -0.101634 | H | 1.932305  | 0.607647  | 2.892935  |
| H | -1.558216 | -3.000901 | -0.644348 | C | 3.403068  | 5.036332  | -0.073278 |
| H | -0.603003 | -2.429084 | -1.995215 | H | 3.888903  | 5.358754  | -1.000807 |
| H | 0.314147  | -0.610315 | -0.327690 | H | 4.066322  | 5.278692  | 0.763491  |
| H | -0.326228 | -1.615480 | 0.942357  | H | 2.491081  | 5.636626  | 0.043255  |
| H | 1.091568  | -3.539114 | 0.140815  | C | 1.753568  | 1.053457  | -2.649535 |
| H | 1.983369  | -2.142607 | 0.713688  | H | 1.855353  | 1.808436  | -3.435809 |
| H | 1.603250  | -3.039709 | -2.192675 | H | 0.705786  | 0.734017  | -2.618118 |
| H | 3.077370  | -3.032076 | -1.248717 | H | 2.336722  | 0.176795  | -2.954898 |
|   |           |           |           | C | -2.918710 | -0.829518 | 0.378911  |
|   |           |           |           | C | -3.065943 | -2.225048 | 0.283831  |
|   |           |           |           | F | -2.033808 | -3.039818 | 0.547821  |

**J**

E= -2302.8152858au

|   |           |           |           |
|---|-----------|-----------|-----------|
| C | -4.252439 | -2.847767 | -0.091318 |
| F | -4.329030 | -4.179841 | -0.178377 |
| C | -5.371938 | -2.068798 | -0.371081 |
| F | -6.518645 | -2.647362 | -0.722464 |
| C | -5.289370 | -0.681567 | -0.275283 |
| F | -6.367726 | 0.067373  | -0.528142 |
| C | -4.082583 | -0.093193 | 0.086888  |
| C | -1.251826 | 1.332257  | 0.377603  |
| C | -0.669892 | 2.234899  | 1.277615  |
| F | -0.425072 | 1.860788  | 2.547155  |
| C | -0.345462 | 3.543131  | 0.935634  |
| F | 0.218489  | 4.368689  | 1.824672  |
| C | -0.585724 | 3.984360  | -0.361404 |
| F | -0.242330 | 5.224808  | -0.716038 |
| C | -1.162946 | 3.125270  | -1.294580 |
| F | -1.371540 | 3.545040  | -2.548060 |
| C | -1.489158 | 1.831333  | -0.910473 |
| F | -2.010639 | 1.027555  | -1.854773 |
| F | -4.088571 | 1.245365  | 0.179395  |
| B | -1.556862 | -0.153287 | 0.794178  |
| P | 1.491510  | -0.864063 | -0.279897 |
| C | -0.538873 | -0.911797 | 1.724156  |
| C | 0.734904  | -1.200631 | 1.383944  |
| H | 1.339983  | -1.772326 | 2.090146  |
| C | -1.064717 | -1.327190 | 3.089659  |
| H | -1.937129 | -1.985711 | 2.996790  |
| H | -0.298517 | -1.856099 | 3.667021  |
| H | -1.380853 | -0.453461 | 3.674091  |

### **J<sub>1</sub>**

**E= -2303.9915418au**

|   |          |           |           |
|---|----------|-----------|-----------|
| C | 2.853773 | -2.179949 | -0.308033 |
| C | 4.254670 | -1.980848 | -0.434977 |
| C | 5.099904 | -3.097619 | -0.501512 |
| H | 6.170740 | -2.925864 | -0.591684 |
| C | 4.630875 | -4.409880 | -0.464861 |
| C | 3.250517 | -4.591005 | -0.399187 |
| H | 2.844776 | -5.600915 | -0.412967 |
| C | 2.358908 | -3.515091 | -0.336045 |
| C | 4.936747 | -0.630680 | -0.535663 |
| H | 4.848799 | -0.043461 | 0.381817  |
| H | 4.531104 | -0.015086 | -1.343236 |
| H | 6.003743 | -0.772506 | -0.734047 |

|   |           |           |           |
|---|-----------|-----------|-----------|
| C | 5.578222  | -5.585577 | -0.498160 |
| H | 6.514597  | -5.332570 | -1.007052 |
| H | 5.133501  | -6.444680 | -1.012563 |
| H | 5.838719  | -5.915649 | 0.516772  |
| C | 0.881695  | -3.847167 | -0.325105 |
| H | 0.315352  | -3.212015 | -1.015764 |
| H | 0.428530  | -3.712434 | 0.661988  |
| H | 0.726852  | -4.889912 | -0.620035 |
| C | 2.278602  | 0.841041  | -0.113339 |
| C | 2.763801  | 1.430720  | 1.079353  |
| C | 3.147603  | 2.778091  | 1.071843  |
| H | 3.510437  | 3.221496  | 1.997152  |
| C | 3.083659  | 3.567275  | -0.077746 |
| C | 2.653181  | 2.958494  | -1.259230 |
| H | 2.621483  | 3.543834  | -2.176212 |
| C | 2.242786  | 1.621261  | -1.299593 |
| C | 2.916228  | 0.671761  | 2.379459  |
| H | 3.623843  | 1.186167  | 3.038064  |
| H | 3.283784  | -0.346722 | 2.220010  |
| H | 1.961745  | 0.598041  | 2.911012  |
| C | 3.421688  | 5.038261  | -0.039161 |
| H | 3.898033  | 5.368518  | -0.968804 |
| H | 4.091715  | 5.276960  | 0.793281  |
| H | 2.508896  | 5.634741  | 0.090102  |
| C | 1.786458  | 1.061349  | -2.633894 |
| H | 1.863535  | 1.826453  | -3.413094 |
| H | 0.748824  | 0.711569  | -2.599570 |
| H | 2.391999  | 0.203981  | -2.951263 |
| C | -2.910550 | -0.815153 | 0.420467  |
| C | -3.061952 | -2.209927 | 0.322285  |
| F | -2.026354 | -3.027183 | 0.564156  |
| C | -4.256322 | -2.828560 | -0.034087 |
| F | -4.337459 | -4.160030 | -0.125350 |
| C | -5.378881 | -2.046005 | -0.290827 |
| F | -6.532882 | -2.620816 | -0.624020 |
| C | -5.291757 | -0.659281 | -0.191216 |
| F | -6.372810 | 0.092866  | -0.421995 |
| C | -4.077377 | -0.074993 | 0.151508  |
| C | -1.234763 | 1.338780  | 0.387529  |
| C | -0.636468 | 2.243161  | 1.275329  |
| F | -0.375658 | 1.873763  | 2.542704  |
| C | -0.313448 | 3.549153  | 0.923505  |
| F | 0.265481  | 4.376787  | 1.800880  |

|   |           |           |           |
|---|-----------|-----------|-----------|
| C | -0.570590 | 3.986055  | -0.371692 |
| F | -0.228772 | 5.223977  | -0.735788 |
| C | -1.165512 | 3.125776  | -1.292774 |
| F | -1.394653 | 3.542666  | -2.543390 |
| C | -1.491222 | 1.834970  | -0.897968 |
| F | -2.039643 | 1.033024  | -1.830223 |
| F | -4.077595 | 1.263388  | 0.249059  |
| B | -1.540878 | -0.143148 | 0.816361  |
| P | 1.510882  | -0.860822 | -0.268132 |
| C | -0.518474 | -0.902883 | 1.740005  |
| C | 0.753433  | -1.195642 | 1.395674  |
| H | 1.357665  | -1.770394 | 2.100110  |
| C | -1.039589 | -1.318166 | 3.107627  |
| H | -1.914513 | -1.973830 | 3.018521  |
| H | -0.272366 | -1.849837 | 3.681071  |
| H | -1.350293 | -0.443995 | 3.694435  |
| H | -2.125768 | -1.270905 | -4.216625 |
| H | -2.106538 | -0.755245 | -3.682627 |

## TS<sub>J12</sub>

E= -2303.9745912au

|   |          |           |           |
|---|----------|-----------|-----------|
| C | 3.266201 | -1.898362 | -0.198671 |
| C | 4.638429 | -1.542926 | -0.124601 |
| C | 5.603160 | -2.557799 | -0.164958 |
| H | 6.651605 | -2.273052 | -0.104129 |
| C | 5.276739 | -3.909286 | -0.280164 |
| C | 3.926032 | -4.236960 | -0.394427 |
| H | 3.641029 | -5.279345 | -0.521025 |
| C | 2.918025 | -3.267700 | -0.373745 |
| C | 5.156431 | -0.123273 | -0.019247 |
| H | 4.838166 | 0.370395  | 0.902681  |
| H | 4.820276 | 0.507434  | -0.847215 |
| H | 6.250613 | -0.127852 | -0.028792 |
| C | 6.345520 | -4.975996 | -0.276746 |
| H | 7.274382 | -4.615678 | -0.731941 |
| H | 6.022572 | -5.868689 | -0.822819 |
| H | 6.587035 | -5.290719 | 0.747531  |
| C | 1.492466 | -3.741939 | -0.572705 |
| H | 0.995912 | -3.198930 | -1.385778 |
| H | 0.870356 | -3.606284 | 0.316977  |
| H | 1.481838 | -4.805780 | -0.828083 |
| C | 2.274621 | 1.060747  | -0.125719 |
| C | 2.517904 | 1.776320  | 1.072157  |
| C | 2.687994 | 3.165078  | 1.009574  |

|   |           |           |           |
|---|-----------|-----------|-----------|
| H | 2.864445  | 3.709406  | 1.934916  |
| C | 2.631060  | 3.872611  | -0.192702 |
| C | 2.436736  | 3.143952  | -1.369236 |
| H | 2.414482  | 3.670017  | -2.321513 |
| C | 2.248661  | 1.758563  | -1.361540 |
| C | 2.601217  | 1.125826  | 2.435748  |
| H | 3.140410  | 1.776255  | 3.132090  |
| H | 3.116456  | 0.160913  | 2.408136  |
| H | 1.602629  | 0.949818  | 2.848012  |
| C | 2.727164  | 5.379020  | -0.220555 |
| H | 3.255878  | 5.733813  | -1.112010 |
| H | 3.243853  | 5.767660  | 0.662926  |
| H | 1.722946  | 5.822964  | -0.238079 |
| C | 2.011565  | 1.064659  | -2.688855 |
| H | 2.205582  | 1.754376  | -3.516184 |
| H | 0.975712  | 0.716190  | -2.783854 |
| H | 2.657032  | 0.190363  | -2.826570 |
| C | -2.855607 | -1.154256 | 0.205010  |
| C | -2.909826 | -2.540540 | 0.004817  |
| F | -1.770768 | -3.262123 | 0.016227  |
| C | -4.088427 | -3.241762 | -0.224844 |
| F | -4.074407 | -4.567088 | -0.415666 |
| C | -5.295736 | -2.547248 | -0.253542 |
| F | -6.441136 | -3.199483 | -0.466508 |
| C | -5.299642 | -1.170275 | -0.054092 |
| F | -6.457764 | -0.499089 | -0.071780 |
| C | -4.095334 | -0.503102 | 0.163588  |
| C | -1.382944 | 1.171331  | 0.182231  |
| C | -1.062891 | 2.070550  | 1.201611  |
| F | -0.849709 | 1.628141  | 2.459390  |
| C | -0.938464 | 3.442254  | 0.998729  |
| F | -0.596532 | 4.256580  | 2.005772  |
| C | -1.153418 | 3.964538  | -0.271639 |
| F | -1.003578 | 5.276851  | -0.491370 |
| C | -1.501094 | 3.113448  | -1.317087 |
| F | -1.705058 | 3.610105  | -2.544230 |
| C | -1.619550 | 1.750116  | -1.068400 |
| F | -1.941494 | 0.965029  | -2.117388 |
| F | -4.182380 | 0.824479  | 0.360475  |
| B | -1.459168 | -0.407260 | 0.438974  |
| P | 1.808742  | -0.735538 | -0.203118 |
| C | -0.440156 | -1.040030 | 1.488179  |
| C | 0.900158  | -1.156507 | 1.326133  |



|   |           |           |           |
|---|-----------|-----------|-----------|
| H | 1.478377  | -1.656811 | 2.104460  |
| C | -1.047738 | -1.553323 | 2.782095  |
| H | -1.745835 | -2.376673 | 2.589212  |
| H | -0.277934 | -1.914621 | 3.473271  |
| H | -1.615068 | -0.764514 | 3.291062  |
| H | -0.052983 | -0.881175 | -1.020056 |
| H | -0.865151 | -0.887096 | -0.984012 |

## **J<sub>2</sub>**

**E= -2304.0109466au**

|   |           |           |           |
|---|-----------|-----------|-----------|
| C | 2.513374  | 1.705203  | -1.269249 |
| C | 2.466567  | 0.828739  | -0.156862 |
| C | 2.926638  | 1.257751  | 1.115328  |
| C | 3.414516  | 2.560406  | 1.248548  |
| C | 3.445770  | 3.453761  | 0.175703  |
| C | 3.011656  | 2.996745  | -1.071159 |
| P | 1.704060  | -0.839743 | -0.235838 |
| C | 2.858998  | 0.391631  | 2.356253  |
| C | 3.873844  | 4.887393  | 0.366932  |
| C | 2.028927  | 1.350796  | -2.659237 |
| C | 0.540767  | -1.184498 | -1.547049 |
| C | -0.802827 | -1.029547 | -1.404899 |
| B | -1.531334 | -0.444137 | -0.052869 |
| C | -1.148279 | 1.135879  | 0.165725  |
| C | -0.710842 | 1.632702  | 1.394474  |
| C | -0.281870 | 2.944760  | 1.593227  |
| C | -0.297651 | 3.835059  | 0.526969  |
| C | -0.742650 | 3.398478  | -0.717895 |
| C | -1.153725 | 2.078035  | -0.864132 |
| F | -0.617030 | 0.816914  | 2.473867  |
| F | -1.526874 | 1.701920  | -2.111988 |
| F | -0.737376 | 4.243533  | -1.762072 |
| F | 0.150622  | 5.091695  | 0.684777  |
| F | 0.181038  | 3.343209  | 2.790289  |
| C | -3.131522 | -0.785978 | -0.000215 |
| C | -4.192094 | 0.114126  | -0.114682 |
| C | -5.533373 | -0.253459 | 0.007649  |
| C | -5.863147 | -1.583000 | 0.244029  |
| C | -4.844400 | -2.525882 | 0.351736  |
| C | -3.522819 | -2.109334 | 0.226247  |
| F | -3.966512 | 1.424113  | -0.356422 |
| F | -6.507566 | 0.663425  | -0.107287 |
| F | -7.146088 | -1.955090 | 0.358856  |

|   |           |           |           |
|---|-----------|-----------|-----------|
| F | -5.146716 | -3.817025 | 0.567737  |
| F | -2.578542 | -3.079283 | 0.317103  |
| C | 2.901201  | -2.228652 | -0.094024 |
| C | 4.202037  | -2.199592 | -0.652495 |
| C | 5.017283  | -3.326315 | -0.503292 |
| C | 4.594051  | -4.474192 | 0.169717  |
| C | 3.299593  | -4.485434 | 0.693611  |
| C | 2.436951  | -3.391400 | 0.579328  |
| C | 4.766734  | -1.022396 | -1.417822 |
| C | 5.510903  | -5.661540 | 0.337393  |
| C | 1.053191  | -3.509721 | 1.183965  |
| H | 3.754878  | 2.890934  | 2.226870  |
| H | 3.039312  | 3.675520  | -1.920284 |
| H | 2.941389  | -5.375757 | 1.205128  |
| H | 6.014653  | -3.304757 | -0.936286 |
| H | 3.466644  | 0.827231  | 3.154200  |
| H | 1.828619  | 0.330232  | 2.729546  |
| H | 3.220950  | -0.628138 | 2.186573  |
| H | 2.405566  | 0.384961  | -3.010529 |
| H | 0.936463  | 1.303377  | -2.703991 |
| H | 2.360707  | 2.110670  | -3.372599 |
| H | 2.992436  | 5.513113  | 0.558948  |
| H | 4.551319  | 4.998313  | 1.219467  |
| H | 4.370671  | 5.284075  | -0.524639 |
| H | 0.871478  | -4.538849 | 1.505243  |
| H | 0.938515  | -2.871066 | 2.069349  |
| H | 0.254889  | -3.234872 | 0.487114  |
| H | 4.952784  | -6.603526 | 0.324202  |
| H | 6.266482  | -5.699806 | -0.453741 |
| H | 6.043044  | -5.612355 | 1.296658  |
| H | 4.929205  | -0.150535 | -0.776391 |
| H | 5.728113  | -1.292871 | -1.863551 |
| H | 4.109918  | -0.705388 | -2.234328 |
| H | 0.950184  | -0.895111 | 0.948884  |
| H | -1.048760 | -1.048210 | 0.886983  |
| H | 0.987095  | -1.600638 | -2.449633 |
| C | -1.647258 | -1.477367 | -2.573604 |
| H | -2.278717 | -2.320458 | -2.268876 |
| H | -2.325772 | -0.671538 | -2.875132 |
| H | -1.054144 | -1.787356 | -3.442317 |

## **J<sub>3</sub>**

**E= -2492.5959905au**

|   |           |           |           |
|---|-----------|-----------|-----------|
| C | 2.579894  | 2.014722  | -1.097561 |
| C | 2.500169  | 1.015162  | -0.096818 |
| C | 2.747472  | 1.336608  | 1.262911  |
| C | 3.047804  | 2.660840  | 1.593608  |
| C | 3.095123  | 3.673284  | 0.632459  |
| C | 2.884954  | 3.320865  | -0.703268 |
| P | 1.932076  | -0.692000 | -0.453547 |
| C | -1.400573 | -1.795228 | 3.413578  |
| O | -2.521050 | -1.544191 | 3.619191  |
| C | 2.653328  | 0.322455  | 2.384105  |
| C | 3.302934  | 5.114351  | 1.027136  |
| C | 2.319037  | 1.773945  | -2.569556 |
| C | 0.856183  | -0.927503 | -1.864142 |
| C | -0.497223 | -0.810368 | -1.793200 |
| B | -1.316814 | -0.384894 | -0.439090 |
| O | -0.269706 | -2.056172 | 3.248742  |
| C | -1.152769 | 1.216066  | -0.099531 |
| C | -1.026487 | 1.665372  | 1.217395  |
| C | -0.806423 | 2.995498  | 1.570221  |
| C | -0.711509 | 3.956733  | 0.570464  |
| C | -0.845376 | 3.569587  | -0.758466 |
| C | -1.066999 | 2.227830  | -1.057323 |
| F | -1.061196 | 0.787612  | 2.251403  |
| F | -1.134173 | 1.922843  | -2.376698 |
| F | -0.728315 | 4.484468  | -1.734915 |
| F | -0.453288 | 5.237998  | 0.882572  |
| F | -0.655936 | 3.352206  | 2.856334  |
| C | -2.881374 | -0.871271 | -0.448392 |
| C | -3.918586 | -0.195076 | -1.093935 |
| C | -5.250901 | -0.601375 | -1.061729 |
| C | -5.594258 | -1.751104 | -0.356617 |
| C | -4.599264 | -2.471265 | 0.296594  |
| C | -3.281046 | -2.023651 | 0.233292  |
| F | -3.651792 | 0.917229  | -1.817455 |
| F | -6.200715 | 0.094909  | -1.706085 |
| F | -6.868318 | -2.164626 | -0.314310 |
| F | -4.917085 | -3.587772 | 0.971166  |
| F | -2.368973 | -2.789010 | 0.884068  |
| C | 3.244208  | -1.980537 | -0.434283 |
| C | 4.590780  | -1.747742 | -0.806712 |
| C | 5.490909  | -2.817322 | -0.755074 |
| C | 5.110153  | -4.100431 | -0.357712 |
| C | 3.776066  | -4.305396 | -0.000316 |

|   |           |           |           |
|---|-----------|-----------|-----------|
| C | 2.828017  | -3.278591 | -0.027871 |
| C | 5.127812  | -0.406753 | -1.258436 |
| C | 6.101921  | -5.238337 | -0.344094 |
| C | 1.410474  | -3.608292 | 0.391241  |
| H | 3.224766  | 2.909180  | 2.637373  |
| H | 2.934363  | 4.093204  | -1.467235 |
| H | 3.455999  | -5.296683 | 0.312074  |
| H | 6.525017  | -2.637002 | -1.039279 |
| H | 3.098041  | 0.727804  | 3.297170  |
| H | 1.607336  | 0.079907  | 2.612999  |
| H | 3.171344  | -0.615451 | 2.155043  |
| H | 2.774011  | 0.851709  | -2.943659 |
| H | 1.246054  | 1.710344  | -2.775122 |
| H | 2.724060  | 2.602252  | -3.158489 |
| H | 3.841813  | 5.201681  | 1.975844  |
| H | 3.856298  | 5.668317  | 0.261587  |
| H | 2.329564  | 5.607218  | 1.150701  |
| H | 1.291964  | -4.690656 | 0.491460  |
| H | 1.151617  | -3.163469 | 1.359960  |
| H | 0.665555  | -3.258058 | -0.330209 |
| H | 7.125920  | -4.876616 | -0.206477 |
| H | 5.880142  | -5.952717 | 0.455512  |
| H | 6.074717  | -5.792317 | -1.291796 |
| H | 5.124670  | 0.332643  | -0.451386 |
| H | 6.158827  | -0.516138 | -1.606359 |
| H | 4.549754  | 0.016016  | -2.085514 |
| H | 1.134325  | -0.985481 | 0.664473  |
| H | -0.792119 | -0.973191 | 0.481643  |
| H | 1.367487  | -1.231966 | -2.776906 |
| C | -1.263966 | -1.149549 | -3.049390 |
| H | -1.930542 | -2.000075 | -2.859135 |
| H | -1.909311 | -0.308914 | -3.325687 |
| H | -0.617483 | -1.398032 | -3.899587 |

### TS<sub>J34</sub>

E= -2492.5438518au

|   |          |           |           |
|---|----------|-----------|-----------|
| C | 2.909362 | 2.437670  | -0.584057 |
| C | 2.960737 | 1.305210  | 0.267121  |
| C | 3.686545 | 1.373912  | 1.485737  |
| C | 4.369106 | 2.553641  | 1.802832  |
| C | 4.343316 | 3.674956  | 0.974787  |
| C | 3.602217 | 3.592103  | -0.206382 |
| P | 2.049171 | -0.283804 | 0.003024  |

|   |           |           |           |
|---|-----------|-----------|-----------|
| C | -0.760217 | -0.374831 | 2.227085  |
| O | -1.770526 | -0.398803 | 2.892274  |
| C | 3.748158  | 0.233733  | 2.482242  |
| C | 5.095811  | 4.934136  | 1.331998  |
| C | 2.146321  | 2.491545  | -1.889574 |
| C | 0.926409  | -0.313173 | -1.441158 |
| C | -0.424167 | -0.332820 | -1.513567 |
| B | -1.631025 | -0.105906 | -0.475319 |
| O | 0.475618  | -0.510874 | 2.499925  |
| C | -2.090591 | 1.427092  | -0.446954 |
| C | -1.309792 | 2.442034  | 0.110347  |
| C | -1.674049 | 3.786044  | 0.091904  |
| C | -2.860502 | 4.159646  | -0.532756 |
| C | -3.660067 | 3.186964  | -1.128846 |
| C | -3.263701 | 1.854675  | -1.075929 |
| F | -0.136975 | 2.140064  | 0.707256  |
| F | -4.055966 | 0.955806  | -1.693885 |
| F | -4.791365 | 3.541678  | -1.749973 |
| F | -3.223311 | 5.444455  | -0.573280 |
| F | -0.891894 | 4.715520  | 0.653874  |
| C | -2.652535 | -1.267640 | -0.144018 |
| C | -3.827073 | -1.054762 | 0.600687  |
| C | -4.692148 | -2.081227 | 0.970427  |
| C | -4.394287 | -3.393105 | 0.616628  |
| C | -3.234513 | -3.663004 | -0.105254 |
| C | -2.396235 | -2.612396 | -0.457081 |
| F | -4.182949 | 0.174910  | 0.988932  |
| F | -5.802745 | -1.818192 | 1.666483  |
| F | -5.212586 | -4.386828 | 0.964915  |
| F | -2.935236 | -4.923230 | -0.446074 |
| F | -1.277980 | -2.956511 | -1.134184 |
| C | 3.228318  | -1.676059 | -0.327587 |
| C | 4.422355  | -1.525410 | -1.076395 |
| C | 5.251682  | -2.638835 | -1.254592 |
| C | 4.944597  | -3.894227 | -0.728638 |
| C | 3.746438  | -4.028425 | -0.024870 |
| C | 2.877997  | -2.953260 | 0.186487  |
| C | 4.862555  | -0.228128 | -1.720494 |
| C | 5.878885  | -5.066562 | -0.907249 |
| C | 1.581903  | -3.224816 | 0.919469  |
| H | 4.926360  | 2.594220  | 2.735836  |
| H | 3.555233  | 4.459150  | -0.861780 |
| H | 3.469420  | -5.003094 | 0.370367  |

|   |           |           |           |
|---|-----------|-----------|-----------|
| H | 6.165513  | -2.516176 | -1.831842 |
| H | 4.414073  | 0.494252  | 3.309902  |
| H | 2.761398  | 0.020707  | 2.909541  |
| H | 4.125918  | -0.693579 | 2.037469  |
| H | 2.503347  | 1.751478  | -2.614739 |
| H | 1.078798  | 2.308910  | -1.745824 |
| H | 2.261883  | 3.477368  | -2.349315 |
| H | 5.398960  | 4.934631  | 2.383544  |
| H | 6.005029  | 5.037176  | 0.725147  |
| H | 4.486275  | 5.827126  | 1.153667  |
| H | 1.538597  | -4.272953 | 1.229185  |
| H | 1.459000  | -2.608057 | 1.814660  |
| H | 0.714945  | -3.040255 | 0.274694  |
| H | 6.504886  | -4.949105 | -1.797769 |
| H | 6.551704  | -5.167028 | -0.045162 |
| H | 5.327308  | -6.008307 | -0.998523 |
| H | 5.216478  | 0.501383  | -0.985155 |
| H | 5.680384  | -0.419126 | -2.421661 |
| H | 4.055868  | 0.250096  | -2.284366 |
| H | 1.217744  | -0.475187 | 1.340248  |
| H | -0.918867 | -0.212966 | 1.062704  |
| H | 1.475212  | -0.430116 | -2.376313 |
| C | -1.018949 | -0.487320 | -2.915527 |
| H | -1.467498 | -1.480775 | -3.021843 |
| H | -1.816359 | 0.241531  | -3.101205 |
| H | -0.259039 | -0.370520 | -3.695311 |

#### J<sub>4</sub>

E= -2492.5679332au

|   |           |           |           |
|---|-----------|-----------|-----------|
| C | 2.698806  | 2.793842  | -0.481235 |
| C | 2.747034  | 1.607288  | 0.294442  |
| C | 3.451562  | 1.631191  | 1.529709  |
| C | 4.113832  | 2.795586  | 1.931613  |
| C | 4.086445  | 3.965375  | 1.172645  |
| C | 3.368807  | 3.935848  | -0.022707 |
| P | 1.834245  | 0.002942  | -0.034549 |
| C | -0.755027 | -0.799206 | 3.157479  |
| O | -1.791580 | -1.056537 | 3.713221  |
| C | 3.525382  | 0.436378  | 2.458334  |
| C | 4.775394  | 5.223508  | 1.644924  |
| C | 1.978798  | 2.925311  | -1.806790 |
| C | 1.002825  | 0.021188  | -1.676945 |
| C | -0.322690 | -0.103095 | -1.883347 |

|   |           |           |           |
|---|-----------|-----------|-----------|
| B | -1.549370 | -0.122877 | -0.886909 |
| O | -0.679651 | -0.001798 | 2.081063  |
| C | -2.311048 | 1.255031  | -0.704069 |
| C | -1.711997 | 2.384613  | -0.145440 |
| C | -2.369880 | 3.605015  | -0.016925 |
| C | -3.677993 | 3.723718  | -0.479635 |
| C | -4.312763 | 2.624533  | -1.055580 |
| C | -3.626073 | 1.419278  | -1.148504 |
| F | -0.448792 | 2.316347  | 0.315243  |
| F | -4.270967 | 0.377772  | -1.710818 |
| F | -5.566530 | 2.738899  | -1.508520 |
| F | -4.321644 | 4.888311  | -0.375977 |
| F | -1.759709 | 4.658257  | 0.537530  |
| C | -2.175306 | -1.446321 | -0.337186 |
| C | -3.181830 | -1.458068 | 0.652398  |
| C | -3.730066 | -2.629126 | 1.165165  |
| C | -3.289553 | -3.859365 | 0.683369  |
| C | -2.300242 | -3.907197 | -0.296436 |
| C | -1.765474 | -2.718809 | -0.778160 |
| F | -3.649777 | -0.320962 | 1.168101  |
| F | -4.676143 | -2.586918 | 2.104004  |
| F | -3.809829 | -4.988374 | 1.159149  |
| F | -1.873094 | -5.088533 | -0.757571 |
| F | -0.806964 | -2.842681 | -1.712860 |
| C | 3.166720  | -1.284418 | -0.370294 |
| C | 4.353850  | -1.045707 | -1.107370 |
| C | 5.278634  | -2.086226 | -1.272500 |
| C | 5.076866  | -3.361621 | -0.747062 |
| C | 3.893064  | -3.589067 | -0.042791 |
| C | 2.938686  | -2.585909 | 0.149843  |
| C | 4.701627  | 0.280796  | -1.746543 |
| C | 6.082050  | -4.468418 | -0.960409 |
| C | 1.671999  | -2.960670 | 0.889227  |
| H | 4.658181  | 2.784784  | 2.873929  |
| H | 3.326136  | 4.836293  | -0.632195 |
| H | 3.700564  | -4.578460 | 0.367353  |
| H | 6.186845  | -1.886352 | -1.837772 |
| H | 4.052858  | 0.701849  | 3.379261  |
| H | 2.525578  | 0.083077  | 2.742481  |
| H | 4.046527  | -0.414470 | 2.006687  |
| H | 2.436131  | 2.310469  | -2.590514 |
| H | 0.931219  | 2.630247  | -1.736737 |
| H | 2.015655  | 3.963815  | -2.149910 |

|   |           |           |           |
|---|-----------|-----------|-----------|
| H | 5.689930  | 4.994867  | 2.203075  |
| H | 5.043417  | 5.873483  | 0.805279  |
| H | 4.125025  | 5.804786  | 2.312310  |
| H | 1.718097  | -4.001439 | 1.224242  |
| H | 1.504596  | -2.332788 | 1.770409  |
| H | 0.794658  | -2.859205 | 0.242754  |
| H | 7.069619  | -4.069849 | -1.214215 |
| H | 6.186518  | -5.092247 | -0.065652 |
| H | 5.774221  | -5.130403 | -1.780826 |
| H | 5.034761  | 1.018714  | -1.009633 |
| H | 5.508972  | 0.146891  | -2.473339 |
| H | 3.852442  | 0.721153  | -2.274966 |
| H | 0.218984  | -0.027237 | 1.658584  |
| H | 0.224833  | -1.194253 | 3.488608  |
| H | 1.651389  | 0.029208  | -2.553763 |
| C | -0.834360 | -0.171020 | -3.322414 |
| H | -1.376395 | -1.106357 | -3.506135 |
| H | -1.528513 | 0.651272  | -3.538907 |
| H | -0.006669 | -0.115487 | -4.037262 |

## K

E= -2494.5525787au

|   |           |           |           |
|---|-----------|-----------|-----------|
| C | -1.835375 | 2.483823  | -0.581159 |
| C | -2.740181 | 3.306971  | 0.139290  |
| C | -2.911866 | 4.640292  | -0.249944 |
| H | -3.605589 | 5.261173  | 0.314081  |
| C | -2.226311 | 5.199498  | -1.330491 |
| C | -1.332656 | 4.382725  | -2.021817 |
| H | -0.775274 | 4.796971  | -2.859647 |
| C | -1.120037 | 3.043333  | -1.671405 |
| C | -3.553835 | 2.824689  | 1.320258  |
| H | -2.946576 | 2.286226  | 2.053309  |
| H | -4.353664 | 2.143745  | 1.012182  |
| H | -4.014713 | 3.674175  | 1.834091  |
| C | -2.460721 | 6.633013  | -1.744897 |
| H | -2.622603 | 7.280448  | -0.875837 |
| H | -3.350227 | 6.721225  | -2.383216 |
| H | -1.612090 | 7.030277  | -2.311495 |
| C | -0.083244 | 2.276332  | -2.467898 |
| H | -0.397631 | 1.257411  | -2.708797 |
| H | 0.851735  | 2.195424  | -1.902213 |
| H | 0.143297  | 2.800380  | -3.402112 |
| C | -3.161857 | -0.097814 | 0.171614  |

|   |           |           |           |
|---|-----------|-----------|-----------|
| C | -3.568625 | -0.699783 | 1.390981  |
| C | -4.806168 | -1.355748 | 1.450018  |
| H | -5.105834 | -1.804891 | 2.394834  |
| C | -5.666800 | -1.449765 | 0.356940  |
| C | -5.248210 | -0.867051 | -0.839519 |
| H | -5.891283 | -0.929799 | -1.715486 |
| C | -4.018729 | -0.212209 | -0.959421 |
| C | -2.761876 | -0.674382 | 2.673621  |
| H | -3.270088 | -1.262405 | 3.444284  |
| H | -2.647850 | 0.340809  | 3.069604  |
| H | -1.757842 | -1.088201 | 2.554371  |
| C | -6.983358 | -2.183832 | 0.453051  |
| H | -7.337789 | -2.237098 | 1.487857  |
| H | -6.892113 | -3.214962 | 0.085704  |
| H | -7.759577 | -1.695700 | -0.146912 |
| C | -3.659908 | 0.351154  | -2.319174 |
| H | -4.375422 | 0.009685  | -3.073529 |
| H | -2.659643 | 0.033328  | -2.639013 |
| H | -3.661454 | 1.446781  | -2.328651 |
| C | 2.760190  | -0.210359 | -0.292289 |
| C | 3.197371  | 1.120814  | -0.396118 |
| F | 2.391463  | 2.130517  | -0.028519 |
| C | 4.437240  | 1.482065  | -0.912294 |
| F | 4.792411  | 2.767757  | -1.008005 |
| C | 5.315557  | 0.486077  | -1.331920 |
| F | 6.511944  | 0.810916  | -1.820044 |
| C | 4.937773  | -0.851582 | -1.242110 |
| F | 5.783931  | -1.809396 | -1.636104 |
| C | 3.682049  | -1.173467 | -0.738256 |
| C | 0.649548  | -1.923120 | -0.130903 |
| C | 0.070891  | -2.805184 | 0.786522  |
| F | 0.159826  | -2.556747 | 2.110004  |
| C | -0.586131 | -3.973359 | 0.410457  |
| F | -1.109801 | -4.792431 | 1.329374  |
| C | -0.687032 | -4.287251 | -0.941830 |
| F | -1.315720 | -5.399171 | -1.326326 |
| C | -0.126345 | -3.437589 | -1.895955 |
| F | -0.231973 | -3.737493 | -3.195682 |
| C | 0.535517  | -2.290451 | -1.478591 |
| F | 1.045327  | -1.491289 | -2.432122 |
| F | 3.393692  | -2.482802 | -0.660996 |
| B | 1.357053  | -0.588723 | 0.316157  |
| P | -1.495343 | 0.671483  | -0.206326 |

|   |           |           |          |
|---|-----------|-----------|----------|
| C | 0.732991  | 0.324172  | 1.442927 |
| C | -0.509163 | 0.855194  | 1.344727 |
| H | -0.861186 | 1.506297  | 2.144371 |
| C | 1.589590  | 0.655392  | 2.620488 |
| C | 2.326551  | -0.350586 | 3.270512 |
| C | 1.692900  | 1.972808  | 3.100621 |
| C | 3.125598  | -0.052654 | 4.374267 |
| H | 2.241097  | -1.379874 | 2.933493 |
| C | 2.494373  | 2.270585  | 4.201953 |
| H | 1.159484  | 2.767576  | 2.587392 |
| C | 3.213193  | 1.259250  | 4.843817 |
| H | 3.676525  | -0.847607 | 4.869978 |
| H | 2.564795  | 3.296492  | 4.553941 |
| H | 3.839070  | 1.492729  | 5.700873 |

### **K<sub>1</sub>**

**E= -2495.7329386au**

|   |           |           |           |
|---|-----------|-----------|-----------|
| C | -0.670962 | 2.978729  | 0.145937  |
| C | -1.299901 | 3.887675  | 1.043342  |
| C | -1.183564 | 5.259790  | 0.817157  |
| H | -1.670422 | 5.942966  | 1.510237  |
| C | -0.467555 | 5.783374  | -0.264469 |
| C | 0.122238  | 4.880039  | -1.141957 |
| H | 0.671551  | 5.256484  | -2.002890 |
| C | 0.035733  | 3.490313  | -0.966432 |
| C | -2.105239 | 3.452185  | 2.247892  |
| H | -1.469685 | 3.027567  | 3.033511  |
| H | -2.859834 | 2.704281  | 1.989517  |
| H | -2.623808 | 4.310191  | 2.685644  |
| C | -0.336339 | 7.274790  | -0.459174 |
| H | 0.019980  | 7.517958  | -1.465075 |
| H | 0.376774  | 7.704185  | 0.256709  |
| H | -1.294002 | 7.785041  | -0.304479 |
| C | 0.700837  | 2.651841  | -2.036944 |
| H | 0.635722  | 1.579962  | -1.859899 |
| H | 1.760632  | 2.916126  | -2.118418 |
| H | 0.243402  | 2.855091  | -3.012865 |
| C | -2.567049 | 0.654358  | 0.327442  |
| C | -3.325354 | 0.072423  | 1.380842  |
| C | -4.651309 | -0.307397 | 1.131025  |
| H | -5.222358 | -0.742798 | 1.948043  |
| C | -5.263404 | -0.155832 | -0.112065 |
| C | -4.500973 | 0.402397  | -1.137181 |

|   |           |           |           |
|---|-----------|-----------|-----------|
| H | -4.945863 | 0.530833  | -2.121604 |
| C | -3.173590 | 0.800183  | -0.950233 |
| C | -2.817106 | -0.185371 | 2.785817  |
| H | -3.625244 | -0.597173 | 3.397808  |
| H | -2.469032 | 0.726085  | 3.279778  |
| H | -1.992810 | -0.902175 | 2.798941  |
| C | -6.684199 | -0.608573 | -0.347963 |
| H | -7.268698 | -0.593067 | 0.577810  |
| H | -6.711099 | -1.636324 | -0.733980 |
| H | -7.190754 | 0.026621  | -1.082569 |
| C | -2.453352 | 1.370501  | -2.151790 |
| H | -3.076951 | 1.274261  | -3.045444 |
| H | -1.514142 | 0.848112  | -2.355441 |
| H | -2.221630 | 2.432180  | -2.021759 |
| C | 2.122118  | -0.325534 | -0.510417 |
| C | 2.843743  | 0.865556  | -0.370181 |
| F | 2.313908  | 1.898868  | 0.315037  |
| C | 4.098238  | 1.087176  | -0.930360 |
| F | 4.708195  | 2.272823  | -0.789382 |
| C | 4.718193  | 0.066304  | -1.643275 |
| F | 5.926170  | 0.254779  | -2.183464 |
| C | 4.065828  | -1.154126 | -1.781408 |
| F | 4.658827  | -2.157317 | -2.442343 |
| C | 2.803478  | -1.325822 | -1.217158 |
| C | -0.223191 | -1.759512 | -0.339553 |
| C | -0.866786 | -2.712193 | 0.454620  |
| F | -0.691616 | -2.723146 | 1.793461  |
| C | -1.715458 | -3.694135 | -0.056725 |
| F | -2.298665 | -4.583386 | 0.758336  |
| C | -1.956417 | -3.746543 | -1.424567 |
| F | -2.769313 | -4.677719 | -1.934158 |
| C | -1.348174 | -2.811851 | -2.260317 |
| F | -1.582222 | -2.844209 | -3.580499 |
| C | -0.507015 | -1.856626 | -1.706400 |
| F | 0.040591  | -0.961333 | -2.563636 |
| F | 2.271426  | -2.559056 | -1.350609 |
| B | 0.708191  | -0.577141 | 0.230989  |
| P | -0.758760 | 1.137450  | 0.471561  |
| C | 0.771098  | -0.287655 | 1.823915  |
| C | -0.052489 | 0.752111  | 2.094190  |
| H | -0.232536 | 1.227110  | 3.052981  |
| C | 1.633768  | -0.990636 | 2.793731  |
| C | 2.296698  | -2.173343 | 2.417484  |

|   |           |           |           |
|---|-----------|-----------|-----------|
| C | 1.831917  | -0.509501 | 4.102027  |
| C | 3.114860  | -2.855602 | 3.316601  |
| H | 2.166825  | -2.566376 | 1.413706  |
| C | 2.651668  | -1.187575 | 4.999706  |
| H | 1.349835  | 0.412040  | 4.415400  |
| C | 3.295522  | -2.366129 | 4.611165  |
| H | 3.612945  | -3.769518 | 3.004470  |
| H | 2.792840  | -0.795366 | 6.003435  |
| H | 3.936214  | -2.894987 | 5.311636  |
| H | 0.018124  | -1.058953 | -5.889763 |
| H | -0.170295 | -1.273881 | -5.204430 |

### TS<sub>K12</sub>

E= -2495.7079755au

|   |          |           |           |
|---|----------|-----------|-----------|
| C | 3.170009 | -2.121578 | -0.550345 |
| C | 4.558486 | -2.029719 | -0.272283 |
| C | 5.358108 | -3.167162 | -0.445117 |
| H | 6.420590 | -3.087230 | -0.225235 |
| C | 4.851343 | -4.389542 | -0.886223 |
| C | 3.492104 | -4.449765 | -1.195103 |
| H | 3.073802 | -5.379647 | -1.574784 |
| C | 2.645933 | -3.345944 | -1.054480 |
| C | 5.263865 | -0.771209 | 0.188409  |
| H | 4.903048 | -0.421115 | 1.158973  |
| H | 5.139482 | 0.058063  | -0.513880 |
| H | 6.336290 | -0.964193 | 0.287664  |
| C | 5.739364 | -5.603277 | -1.020193 |
| H | 5.412303 | -6.251271 | -1.840578 |
| H | 5.723056 | -6.207944 | -0.103372 |
| H | 6.781082 | -5.320133 | -1.204192 |
| C | 1.203184 | -3.513360 | -1.487286 |
| H | 0.916190 | -2.758976 | -2.229524 |
| H | 0.492579 | -3.421348 | -0.660473 |
| H | 1.057605 | -4.498103 | -1.941119 |
| C | 2.625715 | 0.908028  | -0.010425 |
| C | 2.823717 | 1.381807  | 1.309968  |
| C | 3.181774 | 2.722225  | 1.497670  |
| H | 3.318476 | 3.086153  | 2.513683  |
| C | 3.356996 | 3.607520  | 0.432275  |
| C | 3.214513 | 3.105713  | -0.864173 |
| H | 3.376323 | 3.768995  | -1.711313 |
| C | 2.845910 | 1.779523  | -1.108392 |
| C | 2.666239 | 0.524428  | 2.546588  |

|   |           |           |           |
|---|-----------|-----------|-----------|
| H | 3.229055  | 0.958736  | 3.379303  |
| H | 3.023394  | -0.498387 | 2.396686  |
| H | 1.616999  | 0.462080  | 2.850166  |
| C | 3.635638  | 5.071373  | 0.672533  |
| H | 4.138902  | 5.235527  | 1.630907  |
| H | 2.692985  | 5.634051  | 0.694447  |
| H | 4.255955  | 5.501564  | -0.121002 |
| C | 2.687501  | 1.333774  | -2.548532 |
| H | 3.063264  | 2.105088  | -3.227878 |
| H | 1.636587  | 1.150029  | -2.803874 |
| H | 3.234179  | 0.408276  | -2.761704 |
| C | -2.763015 | -0.467039 | -0.487450 |
| C | -3.002948 | -1.783795 | -0.900036 |
| F | -1.983921 | -2.665729 | -0.954223 |
| C | -4.253032 | -2.251947 | -1.289709 |
| F | -4.419492 | -3.520688 | -1.685621 |
| C | -5.341461 | -1.383297 | -1.265734 |
| F | -6.552566 | -1.813539 | -1.630602 |
| C | -5.158488 | -0.066030 | -0.856534 |
| F | -6.202526 | 0.772388  | -0.821163 |
| C | -3.887726 | 0.365871  | -0.482648 |
| C | -0.956776 | 1.573889  | -0.121111 |
| C | -0.525460 | 2.316449  | 0.979676  |
| F | -0.423852 | 1.741417  | 2.196688  |
| C | -0.181256 | 3.663827  | 0.906452  |
| F | 0.266062  | 4.318158  | 1.987450  |
| C | -0.276834 | 4.327621  | -0.310508 |
| F | 0.083024  | 5.613962  | -0.401821 |
| C | -0.725484 | 3.640182  | -1.435203 |
| F | -0.815858 | 4.271139  | -2.613412 |
| C | -1.059007 | 2.295237  | -1.316325 |
| F | -1.466544 | 1.668562  | -2.438799 |
| F | -3.790151 | 1.646514  | -0.076954 |
| B | -1.297099 | 0.008303  | -0.049601 |
| P | 1.914587  | -0.752330 | -0.429860 |
| C | -0.521786 | -0.933841 | 0.987905  |
| C | 0.796046  | -1.262683 | 0.917761  |
| H | 1.198926  | -1.977393 | 1.634616  |
| C | -1.334333 | -1.571041 | 2.071402  |
| C | -2.239129 | -0.812758 | 2.835572  |
| C | -1.228544 | -2.946227 | 2.344667  |
| C | -2.993690 | -1.404218 | 3.848386  |
| H | -2.329275 | 0.253548  | 2.655677  |

|   |           |           |           |
|---|-----------|-----------|-----------|
| C | -1.988375 | -3.539554 | 3.352315  |
| H | -0.561266 | -3.558311 | 1.744684  |
| C | -2.873127 | -2.770344 | 4.110665  |
| H | -3.677015 | -0.794844 | 4.434086  |
| H | -1.895839 | -4.606536 | 3.538077  |
| H | -3.466803 | -3.232167 | 4.894957  |
| H | 0.196795  | -0.492218 | -1.399793 |
| H | -0.624416 | -0.397318 | -1.419820 |

## **K<sub>2</sub>**

**E= -2495.7387255 au**

|   |           |           |           |
|---|-----------|-----------|-----------|
| C | -1.668821 | 3.175157  | 0.278661  |
| C | -2.174981 | 2.047372  | -0.411493 |
| C | -2.823099 | 2.205880  | -1.666183 |
| C | -2.975692 | 3.493261  | -2.184906 |
| C | -2.505098 | 4.625465  | -1.515286 |
| C | -1.855951 | 4.438427  | -0.294828 |
| P | -2.023452 | 0.322725  | 0.206025  |
| C | -3.331164 | 1.045739  | -2.497638 |
| C | -2.708812 | 6.007383  | -2.087021 |
| C | -0.888501 | 3.118087  | 1.572671  |
| C | -0.931002 | -0.098489 | 1.563313  |
| C | 0.404846  | -0.285322 | 1.405229  |
| B | 1.122331  | 0.033374  | -0.042032 |
| C | 2.663072  | 0.560837  | 0.082180  |
| C | 3.000490  | 1.911758  | -0.013759 |
| C | 4.309638  | 2.386828  | 0.050459  |
| C | 5.354573  | 1.483622  | 0.218784  |
| C | 5.071715  | 0.124940  | 0.327421  |
| C | 3.747255  | -0.301755 | 0.261384  |
| F | 2.036444  | 2.850955  | -0.164001 |
| F | 3.534243  | -1.628047 | 0.392324  |
| F | 6.072751  | -0.752207 | 0.500977  |
| F | 6.620803  | 1.918892  | 0.284363  |
| F | 4.572033  | 3.700822  | -0.047695 |
| C | 1.044068  | -1.212432 | -1.116506 |
| C | 1.321744  | -0.947716 | -2.463812 |
| C | 1.290850  | -1.913341 | -3.467512 |
| C | 0.964124  | -3.227150 | -3.141845 |
| C | 0.673532  | -3.543493 | -1.819823 |
| C | 0.728528  | -2.543155 | -0.849768 |
| F | 1.637860  | 0.305355  | -2.848786 |
| F | 1.565057  | -1.592461 | -4.741972 |

|   |           |           |           |
|---|-----------|-----------|-----------|
| F | 0.918388  | -4.170813 | -4.092614 |
| F | 0.337243  | -4.801792 | -1.489794 |
| F | 0.412183  | -2.934808 | 0.410942  |
| C | -3.665808 | -0.404759 | 0.614373  |
| C | -4.628111 | 0.308418  | 1.370029  |
| C | -5.848363 | -0.311200 | 1.657866  |
| C | -6.148305 | -1.606704 | 1.231951  |
| C | -5.170005 | -2.302053 | 0.518216  |
| C | -3.930333 | -1.737529 | 0.202366  |
| C | -4.404429 | 1.706363  | 1.905361  |
| C | -7.489140 | -2.233375 | 1.528039  |
| C | -2.929320 | -2.597105 | -0.541331 |
| H | -3.470955 | 3.610769  | -3.145970 |
| H | -1.465902 | 5.304749  | 0.234035  |
| H | -5.368938 | -3.323643 | 0.203136  |
| H | -6.583243 | 0.237847  | 2.242228  |
| H | -3.889784 | 1.417881  | -3.360602 |
| H | -2.503494 | 0.439003  | -2.888416 |
| H | -3.996877 | 0.380132  | -1.938023 |
| H | -1.285145 | 2.403193  | 2.296176  |
| H | 0.149214  | 2.833873  | 1.370039  |
| H | -0.878924 | 4.105460  | 2.043774  |
| H | -2.677862 | 5.995667  | -3.181483 |
| H | -3.685695 | 6.414055  | -1.793025 |
| H | -1.943463 | 6.703975  | -1.730839 |
| H | -3.319283 | -3.611920 | -0.657152 |
| H | -2.721493 | -2.217773 | -1.549994 |
| H | -1.972932 | -2.674533 | -0.014333 |
| H | -7.413973 | -3.322690 | 1.607037  |
| H | -7.913634 | -1.850614 | 2.461895  |
| H | -8.208743 | -2.013177 | 0.728314  |
| H | -4.435209 | 2.461396  | 1.113098  |
| H | -5.179899 | 1.956747  | 2.634844  |
| H | -3.439297 | 1.807698  | 2.412805  |
| H | -1.612247 | -0.393021 | -0.930579 |
| H | 0.466116  | 0.929788  | -0.541195 |
| H | -1.452145 | -0.285021 | 2.501332  |
| C | 1.120659  | -0.751744 | 2.628998  |
| C | 2.161063  | 0.007102  | 3.193286  |
| C | 0.728857  | -1.933302 | 3.283465  |
| C | 2.780259  | -0.399409 | 4.375400  |
| H | 2.470342  | 0.930797  | 2.717471  |
| C | 1.364054  | -2.348781 | 4.453250  |

|   |           |           |          |
|---|-----------|-----------|----------|
| H | -0.059270 | -2.540642 | 2.851055 |
| C | 2.390387  | -1.581578 | 5.007037 |
| H | 3.573798  | 0.209737  | 4.800379 |
| H | 1.055619  | -3.274905 | 4.931538 |
| H | 2.883724  | -1.903103 | 5.920370 |

### **K<sub>3</sub>**

**E= -2684.3246198 au**

|   |           |           |           |
|---|-----------|-----------|-----------|
| C | -2.978734 | 1.566152  | 1.398029  |
| C | -2.844981 | 0.782340  | 0.226709  |
| C | -3.326478 | 1.261499  | -1.019743 |
| C | -3.916237 | 2.527402  | -1.065874 |
| C | -4.030925 | 3.335267  | 0.068090  |
| C | -3.578815 | 2.824173  | 1.287140  |
| P | -1.952858 | -0.820703 | 0.202620  |
| C | 1.281779  | -0.877159 | -4.053006 |
| O | 2.331277  | -0.384602 | -4.186841 |
| C | -3.190548 | 0.487462  | -2.314998 |
| C | -4.566169 | 4.742070  | -0.029572 |
| C | -2.473472 | 1.150429  | 2.762723  |
| C | -0.696583 | -1.148606 | 1.439414  |
| C | 0.626982  | -0.892447 | 1.240302  |
| B | 1.225048  | -0.109501 | -0.079886 |
| O | 0.225172  | -1.374500 | -3.957751 |
| C | 0.685135  | 1.442166  | -0.139325 |
| C | 0.281875  | 2.029073  | -1.340791 |
| C | -0.238589 | 3.317729  | -1.443544 |
| C | -0.363408 | 4.092942  | -0.296673 |
| C | 0.035086  | 3.564803  | 0.926929  |
| C | 0.549258  | 2.272350  | 0.974910  |
| F | 0.319995  | 1.322900  | -2.500413 |
| F | 0.867566  | 1.808773  | 2.207070  |
| F | -0.113279 | 4.290933  | 2.047014  |
| F | -0.902764 | 5.321306  | -0.363135 |
| F | -0.649746 | 3.803624  | -2.626127 |
| C | 2.845980  | -0.208853 | -0.271050 |
| C | 3.778493  | 0.653843  | 0.309563  |
| C | 5.151195  | 0.579532  | 0.078577  |
| C | 5.650374  | -0.406813 | -0.765802 |
| C | 4.767585  | -1.302705 | -1.360284 |
| C | 3.405162  | -1.184794 | -1.099285 |
| F | 3.372926  | 1.627810  | 1.151547  |
| F | 5.994711  | 1.443908  | 0.664430  |



|   |           |           |           |
|---|-----------|-----------|-----------|
| F | 6.967335  | -0.498606 | -0.997189 |
| F | 5.236129  | -2.270036 | -2.165692 |
| F | 2.609056  | -2.116447 | -1.687048 |
| C | -3.041956 | -2.293094 | 0.024402  |
| C | -4.340114 | -2.384984 | 0.586208  |
| C | -5.074510 | -3.556729 | 0.379504  |
| C | -4.576304 | -4.635724 | -0.354159 |
| C | -3.287034 | -4.529535 | -0.877867 |
| C | -2.501428 | -3.385240 | -0.708119 |
| C | -4.986780 | -1.295849 | 1.414545  |
| C | -5.411825 | -5.871287 | -0.584707 |
| C | -1.115756 | -3.380527 | -1.317820 |
| H | -4.274007 | 2.899930  | -2.022682 |
| H | -3.672722 | 3.433428  | 2.183004  |
| H | -2.869698 | -5.364653 | -1.435377 |
| H | -6.068696 | -3.627085 | 0.814647  |
| H | -3.808330 | 0.944214  | -3.093025 |
| H | -2.154283 | 0.497171  | -2.677534 |
| H | -3.502809 | -0.558259 | -2.219539 |
| H | -2.671739 | 0.100617  | 2.996326  |
| H | -1.392073 | 1.298928  | 2.841823  |
| H | -2.950857 | 1.756583  | 3.538319  |
| H | -5.085265 | 5.042968  | 0.886328  |
| H | -3.734078 | 5.441796  | -0.182333 |
| H | -5.254929 | 4.857074  | -0.872508 |
| H | -0.858656 | -4.384011 | -1.667820 |
| H | -1.042502 | -2.710270 | -2.182726 |
| H | -0.344023 | -3.070577 | -0.606336 |
| H | -4.785914 | -6.760090 | -0.713616 |
| H | -6.098277 | -6.053036 | 0.248743  |
| H | -6.021281 | -5.766670 | -1.492161 |
| H | -5.196775 | -0.396915 | 0.827264  |
| H | -5.934208 | -1.654111 | 1.826852  |
| H | -4.361527 | -0.992245 | 2.260211  |
| H | -1.245293 | -0.761901 | -1.009731 |
| H | 0.739445  | -0.669960 | -1.041402 |
| H | -1.050645 | -1.704968 | 2.305608  |
| C | 1.524391  | -1.444065 | 2.299714  |
| C | 1.443189  | -1.001613 | 3.629467  |
| C | 2.449013  | -2.454351 | 1.982844  |
| C | 2.268158  | -1.548511 | 4.613843  |
| H | 0.749527  | -0.206939 | 3.885081  |
| C | 3.256415  | -3.013635 | 2.972377  |

|   |          |           |          |
|---|----------|-----------|----------|
| H | 2.516168 | -2.815732 | 0.961581 |
| C | 3.174237 | -2.559215 | 4.290751 |
| H | 2.200951 | -1.181787 | 5.634928 |
| H | 3.955507 | -3.803588 | 2.710350 |
| H | 3.813690 | -2.987500 | 5.057936 |

### TS<sub>K34</sub>

E= -2684.2736413au

|   |           |           |           |
|---|-----------|-----------|-----------|
| C | 3.016871  | 2.465807  | -0.637465 |
| C | 3.115839  | 1.416501  | 0.307909  |
| C | 3.921851  | 1.586370  | 1.467747  |
| C | 4.630139  | 2.779182  | 1.631446  |
| C | 4.556736  | 3.823087  | 0.706589  |
| C | 3.742736  | 3.642305  | -0.410664 |
| P | 2.181886  | -0.181190 | 0.247098  |
| C | -0.491243 | -0.040724 | 2.599779  |
| O | -1.472447 | 0.024773  | 3.304933  |
| C | 4.044341  | 0.537748  | 2.555253  |
| C | 5.331913  | 5.101405  | 0.917568  |
| C | 2.170860  | 2.417017  | -1.891294 |
| C | 0.991274  | -0.325034 | -1.133542 |
| C | -0.363808 | -0.323667 | -1.150334 |
| B | -1.518238 | -0.032004 | -0.054757 |
| O | 0.753905  | -0.152617 | 2.839197  |
| C | -2.017407 | 1.490448  | -0.042485 |
| C | -1.193923 | 2.540687  | 0.371193  |
| C | -1.588395 | 3.876271  | 0.366575  |
| C | -2.858410 | 4.206426  | -0.095654 |
| C | -3.709279 | 3.198447  | -0.544378 |
| C | -3.279756 | 1.875801  | -0.510533 |
| F | 0.055222  | 2.284124  | 0.815507  |
| F | -4.129210 | 0.949865  | -0.989692 |
| F | -4.924401 | 3.511221  | -1.010393 |
| F | -3.255008 | 5.481248  | -0.121402 |
| F | -0.757664 | 4.836828  | 0.788872  |
| C | -2.472093 | -1.197564 | 0.441495  |
| C | -3.605180 | -0.974814 | 1.247490  |
| C | -4.411113 | -2.001358 | 1.733385  |
| C | -4.089320 | -3.324408 | 1.451049  |
| C | -2.959937 | -3.604256 | 0.687361  |
| C | -2.181895 | -2.553387 | 0.217827  |
| F | -3.981927 | 0.261473  | 1.591585  |
| F | -5.486653 | -1.725269 | 2.478378  |

|   |           |           |           |
|---|-----------|-----------|-----------|
| F | -4.849326 | -4.317590 | 1.914634  |
| F | -2.624020 | -4.874649 | 0.426634  |
| F | -1.073952 | -2.912862 | -0.465408 |
| C | 3.334676  | -1.608660 | -0.017940 |
| C | 4.462926  | -1.544685 | -0.873887 |
| C | 5.284496  | -2.671394 | -0.992945 |
| C | 5.031750  | -3.858938 | -0.305078 |
| C | 3.896101  | -3.911511 | 0.505045  |
| C | 3.037966  | -2.818929 | 0.664236  |
| C | 4.837715  | -0.327375 | -1.691437 |
| C | 5.958673  | -5.044388 | -0.425609 |
| C | 1.808048  | -3.007468 | 1.526137  |
| H | 5.248775  | 2.896636  | 2.518473  |
| H | 3.662310  | 4.445820  | -1.138913 |
| H | 3.660530  | -4.835140 | 1.028834  |
| H | 6.147656  | -2.615019 | -1.652560 |
| H | 4.747060  | 0.875011  | 3.322478  |
| H | 3.082848  | 0.355693  | 3.049326  |
| H | 4.411477  | -0.421548 | 2.173572  |
| H | 2.457805  | 1.600762  | -2.563061 |
| H | 1.111477  | 2.283575  | -1.660683 |
| H | 2.279773  | 3.350464  | -2.450942 |
| H | 5.108362  | 5.838767  | 0.140652  |
| H | 5.095377  | 5.552650  | 1.888581  |
| H | 6.413582  | 4.917091  | 0.903903  |
| H | 1.797117  | -4.016992 | 1.947032  |
| H | 1.752909  | -2.300001 | 2.358837  |
| H | 0.890391  | -2.890728 | 0.938537  |
| H | 5.410708  | -5.990234 | -0.358718 |
| H | 6.505235  | -5.031958 | -1.374222 |
| H | 6.703651  | -5.043325 | 0.381226  |
| H | 5.226261  | 0.485100  | -1.069626 |
| H | 5.610489  | -0.590559 | -2.419697 |
| H | 3.987508  | 0.074393  | -2.251532 |
| H | 1.431226  | -0.240291 | 1.643193  |
| H | -0.697058 | -0.019347 | 1.431731  |
| H | 1.491513  | -0.529253 | -2.079570 |
| C | -0.958984 | -0.609545 | -2.511602 |
| C | -1.784368 | 0.318468  | -3.168573 |
| C | -0.658306 | -1.814912 | -3.172263 |
| C | -2.290111 | 0.051233  | -4.441576 |
| H | -2.003881 | 1.271260  | -2.702395 |
| C | -1.171113 | -2.083148 | -4.440516 |

|   |           |           |           |
|---|-----------|-----------|-----------|
| H | -0.030752 | -2.547980 | -2.677572 |
| C | -1.991852 | -1.152254 | -5.080656 |
| H | -2.917383 | 0.790156  | -4.932816 |
| H | -0.929199 | -3.024063 | -4.927706 |
| H | -2.392591 | -1.362505 | -6.068446 |

#### **K<sub>4</sub>**

**E= -2684.3051123 au**

|   |           |           |           |
|---|-----------|-----------|-----------|
| C | -2.083816 | 3.092164  | 0.350603  |
| C | -2.434030 | 1.912987  | -0.357552 |
| C | -3.220259 | 2.034794  | -1.537191 |
| C | -3.644197 | 3.299878  | -1.959861 |
| C | -3.305561 | 4.466614  | -1.276760 |
| C | -2.527495 | 4.331806  | -0.126833 |
| P | -1.838773 | 0.165206  | -0.005777 |
| C | 0.158869  | 0.502905  | -3.571582 |
| O | 0.601893  | 0.456791  | -4.687969 |
| C | -3.650684 | 0.848345  | -2.376174 |
| C | -3.737160 | 5.824802  | -1.775960 |
| C | -1.269739 | 3.121457  | 1.626977  |
| C | -0.898594 | 0.073500  | 1.572394  |
| C | 0.419571  | -0.221646 | 1.654526  |
| B | 1.425177  | -0.413824 | 0.447606  |
| O | -0.341221 | -0.580596 | -2.939024 |
| C | 2.459731  | 0.765050  | 0.194447  |
| C | 2.089135  | 2.012111  | -0.302052 |
| C | 2.991745  | 3.052844  | -0.497784 |
| C | 4.332932  | 2.852885  | -0.177854 |
| C | 4.750948  | 1.618673  | 0.316514  |
| C | 3.816282  | 0.601096  | 0.480557  |
| F | 0.800737  | 2.230952  | -0.651702 |
| F | 4.257507  | -0.583863 | 0.947694  |
| F | 6.038098  | 1.423874  | 0.621927  |
| F | 5.215898  | 3.839049  | -0.347972 |
| F | 2.587687  | 4.229392  | -0.987516 |
| C | 1.576580  | -1.731571 | -0.374296 |
| C | 2.241651  | -1.774228 | -1.617203 |
| C | 2.399470  | -2.939182 | -2.357999 |
| C | 1.894705  | -4.137513 | -1.857604 |
| C | 1.230786  | -4.155230 | -0.632261 |
| C | 1.078104  | -2.969224 | 0.074317  |
| F | 2.727972  | -0.654730 | -2.167602 |
| F | 3.025594  | -2.922701 | -3.535092 |

|   |           |           |           |
|---|-----------|-----------|-----------|
| F | 2.041959  | -5.263580 | -2.549770 |
| F | 0.740945  | -5.304146 | -0.155391 |
| F | 0.425302  | -3.055536 | 1.244491  |
| C | -3.382910 | -0.805507 | 0.457359  |
| C | -4.418141 | -0.310113 | 1.291598  |
| C | -5.533819 | -1.116579 | 1.550163  |
| C | -5.673624 | -2.398019 | 1.017369  |
| C | -4.636906 | -2.880863 | 0.218080  |
| C | -3.499695 | -2.118563 | -0.069601 |
| C | -4.401946 | 1.056343  | 1.940587  |
| C | -6.906598 | -3.227797 | 1.285189  |
| C | -2.418493 | -2.772289 | -0.903279 |
| H | -4.253576 | 3.368333  | -2.858541 |
| H | -2.253460 | 5.225818  | 0.429605  |
| H | -4.707144 | -3.886078 | -0.192186 |
| H | -6.317593 | -0.724912 | 2.195512  |
| H | -4.171308 | 1.190858  | -3.275235 |
| H | -2.799560 | 0.241933  | -2.705742 |
| H | -4.327425 | 0.181130  | -1.832062 |
| H | -1.779200 | 2.610140  | 2.451592  |
| H | -0.292352 | 2.652041  | 1.507806  |
| H | -1.107369 | 4.156857  | 1.941740  |
| H | -3.914944 | 6.519011  | -0.947330 |
| H | -2.965953 | 6.274436  | -2.415683 |
| H | -4.655148 | 5.760600  | -2.369603 |
| H | -2.755430 | -3.748922 | -1.264268 |
| H | -2.127788 | -2.177833 | -1.774446 |
| H | -1.519139 | -2.938581 | -0.302387 |
| H | -6.668880 | -4.296037 | 1.331635  |
| H | -7.384089 | -2.943447 | 2.228729  |
| H | -7.652042 | -3.095951 | 0.489409  |
| H | -4.596357 | 1.856253  | 1.219102  |
| H | -5.170858 | 1.112293  | 2.717390  |
| H | -3.442084 | 1.280217  | 2.413098  |
| H | -0.677706 | -0.336618 | -2.039983 |
| H | 0.121631  | 1.422794  | -2.961105 |
| H | -1.458832 | 0.179748  | 2.500679  |
| C | 1.082057  | -0.263073 | 2.997714  |
| C | 0.731219  | 0.648249  | 4.011297  |
| C | 2.094196  | -1.200666 | 3.274453  |
| C | 1.352950  | 0.609469  | 5.257813  |
| H | -0.020413 | 1.405354  | 3.811438  |
| C | 2.717339  | -1.238181 | 4.521705  |

|   |          |           |          |
|---|----------|-----------|----------|
| H | 2.383141 | -1.925089 | 2.520374 |
| C | 2.348352 | -0.335100 | 5.519276 |
| H | 1.066078 | 1.325367  | 6.023540 |
| H | 3.489900 | -1.977767 | 4.713192 |
| H | 2.835228 | -0.362622 | 6.490153 |

## L

E= -2551.119303au

|   |             |             |             |
|---|-------------|-------------|-------------|
| C | -2.53697300 | 2.68662000  | -0.37170800 |
| C | -2.52208200 | 1.46666300  | -1.09343300 |
| C | -3.04141700 | 1.47136900  | -2.42328400 |
| C | -3.57421500 | 2.64604800  | -2.96136100 |
| C | -3.59616300 | 3.84935600  | -2.25612000 |
| C | -3.07094600 | 3.83879400  | -0.96674200 |
| P | -1.74404400 | -0.18710300 | -0.64528000 |
| C | -3.04627400 | 0.24813600  | -3.31756500 |
| C | -4.14249600 | 5.11280800  | -2.87703700 |
| C | -2.01160500 | 2.85885300  | 1.03543600  |
| C | -0.76101700 | -0.14938400 | 1.03594800  |
| C | 0.49118100  | -0.98016200 | 0.71595200  |
| B | 1.97146900  | -0.44927100 | 0.51003900  |
| C | 2.35639800  | 1.09668400  | 0.69411100  |
| C | 1.79501000  | 2.13639700  | -0.04790700 |
| C | 2.19357000  | 3.46582300  | 0.08451200  |
| C | 3.20084100  | 3.78995100  | 0.98959200  |
| C | 3.79451500  | 2.78504300  | 1.74995100  |
| C | 3.36398400  | 1.47137400  | 1.58599300  |
| F | 0.80835600  | 1.88339000  | -0.92799600 |
| F | 3.96511600  | 0.52667500  | 2.34178500  |
| F | 4.76213200  | 3.09118000  | 2.62466500  |
| F | 3.59271100  | 5.06016400  | 1.13271500  |
| F | 1.61246200  | 4.43146300  | -0.63904700 |
| C | 2.98438000  | -1.33113700 | -0.37094000 |
| C | 3.18135700  | -1.00072200 | -1.71501800 |
| C | 4.03886100  | -1.69990800 | -2.55954400 |
| C | 4.74182900  | -2.79500000 | -2.06185200 |
| C | 4.57564900  | -3.16783800 | -0.73187600 |
| C | 3.71224600  | -2.43263200 | 0.07799400  |
| F | 2.51893800  | 0.04704400  | -2.24113800 |
| F | 4.19029100  | -1.33681700 | -3.83942000 |
| F | 5.56789100  | -3.48343900 | -2.85671900 |
| F | 5.24402500  | -4.22084400 | -0.24213500 |
| F | 3.59811000  | -2.85700100 | 1.36497000  |

|   |             |             |             |
|---|-------------|-------------|-------------|
| C | -3.19398000 | -1.35345000 | -0.37001300 |
| C | -4.39263400 | -1.04541700 | 0.32596100  |
| C | -5.41464400 | -2.00063200 | 0.39304100  |
| C | -5.30524400 | -3.26005700 | -0.19730100 |
| C | -4.11988900 | -3.55675000 | -0.87087500 |
| C | -3.07081600 | -2.63522000 | -0.97555500 |
| C | -4.63294600 | 0.26901100  | 1.03025500  |
| C | -6.43871900 | -4.25609500 | -0.13103000 |
| C | -1.83806800 | -3.08197200 | -1.74008900 |
| H | -0.44620400 | 0.88706400  | 1.14942300  |
| H | -3.97497800 | 2.61650700  | -3.97272900 |
| H | -3.07638200 | 4.76089400  | -0.38890400 |
| H | -4.00557700 | -4.53360600 | -1.33665900 |
| H | -6.32491800 | -1.74884900 | 0.93371800  |
| H | -3.41833400 | 0.50976200  | -4.31293900 |
| H | -2.03792000 | -0.16699300 | -3.43318300 |
| H | -3.68159400 | -0.55406700 | -2.92622200 |
| H | -2.32866300 | 2.05584800  | 1.70297600  |
| H | -0.91558500 | 2.90480500  | 1.05328200  |
| H | -2.37318600 | 3.80057900  | 1.46006700  |
| H | -3.41633900 | 5.56188100  | -3.56778100 |
| H | -5.05447100 | 4.91605900  | -3.45228600 |
| H | -4.37740700 | 5.86419800  | -2.11591900 |
| H | -2.02070700 | -4.04986600 | -2.21788800 |
| H | -1.54827900 | -2.36532200 | -2.51329000 |
| H | -0.96518000 | -3.20440600 | -1.08740000 |
| H | -6.07035000 | -5.28698400 | -0.16759300 |
| H | -7.02515600 | -4.13557000 | 0.78619300  |
| H | -7.12837600 | -4.12754600 | -0.97620000 |
| H | -4.67018600 | 1.10842800  | 0.33033900  |
| H | -5.58146000 | 0.24022700  | 1.57546700  |
| H | -3.84282100 | 0.48267800  | 1.75625100  |
| H | 0.26861900  | -1.96552500 | 0.31139300  |
| N | 1.47248500  | -1.14174400 | 1.86444500  |
| C | -1.39486100 | -0.59926600 | 2.34243600  |
| C | -1.36328200 | 0.25144200  | 3.46178000  |
| C | -1.90774700 | -1.89612600 | 2.52213500  |
| C | -1.85618900 | -0.16002000 | 4.70346400  |
| H | -0.94756800 | 1.25130000  | 3.36192300  |
| C | -2.40051800 | -2.30843500 | 3.75973500  |
| H | -1.93300000 | -2.58743600 | 1.68658000  |
| C | -2.38218600 | -1.44212600 | 4.85603300  |
| H | -1.82212800 | 0.52277200  | 5.54842100  |

|   |             |             |            |
|---|-------------|-------------|------------|
| H | -2.80013400 | -3.31337900 | 3.86750600 |
| H | -2.76728900 | -1.76710400 | 5.81861700 |
| H | 1.77486700  | -2.08044800 | 2.10625600 |
| H | 1.27686900  | -0.57926700 | 2.68887100 |

## L1

E= -2552.274441au

|   |            |             |             |
|---|------------|-------------|-------------|
| C | 2.52123200 | -0.92998200 | -1.25533200 |
| C | 3.88301700 | -0.54979200 | -1.12423800 |
| C | 4.85472700 | -1.21488800 | -1.88235600 |
| H | 5.89445200 | -0.91396400 | -1.77000000 |
| C | 4.53944800 | -2.24381900 | -2.77050700 |
| C | 3.19641400 | -2.60005500 | -2.89683100 |
| H | 2.92108900 | -3.39058500 | -3.59209900 |
| C | 2.18368600 | -1.96846800 | -2.16521200 |
| C | 4.36220800 | 0.54967700  | -0.20400300 |
| H | 3.92742500 | 0.46270200  | 0.79415600  |
| H | 4.10637300 | 1.54222200  | -0.58879100 |
| H | 5.45021900 | 0.50269800  | -0.09464800 |
| C | 5.61512300 | -2.96129500 | -3.55118800 |
| H | 5.98104700 | -3.84094100 | -3.00450900 |
| H | 6.47756200 | -2.31217100 | -3.73610000 |
| H | 5.24050000 | -3.31431500 | -4.51801400 |
| C | 0.76298500 | -2.44217600 | -2.39789000 |
| H | 0.72193300 | -3.09292200 | -3.27715600 |
| H | 0.07028700 | -1.61043800 | -2.55550900 |
| H | 0.38124000 | -3.01711500 | -1.54856900 |
| C | 1.41987200 | 1.72513700  | -0.46992400 |
| C | 1.69235000 | 2.65546000  | 0.56127800  |
| C | 1.79875300 | 4.01973000  | 0.25629900  |
| H | 2.01538600 | 4.71280500  | 1.06670800  |
| C | 1.64291500 | 4.51551900  | -1.03607800 |
| C | 1.35147900 | 3.59311200  | -2.04244300 |
| H | 1.20575600 | 3.94838400  | -3.06057800 |
| C | 1.22250100 | 2.22325900  | -1.79314500 |
| C | 1.87313600 | 2.26895600  | 2.00744500  |
| H | 2.35177500 | 3.08050000  | 2.56464500  |
| H | 2.49084400 | 1.37879000  | 2.12288400  |
| H | 0.91194300 | 2.07147200  | 2.49620600  |
| C | 1.79746400 | 5.98604300  | -1.34253100 |
| H | 1.66913400 | 6.59831600  | -0.44400000 |
| H | 1.06621500 | 6.31898900  | -2.08761500 |

|   |             |             |             |
|---|-------------|-------------|-------------|
| H | 2.79429900  | 6.20422600  | -1.74881700 |
| C | 0.85243700  | 1.34486700  | -2.97107600 |
| H | 0.68694600  | 1.96001000  | -3.86075600 |
| H | -0.06925900 | 0.78512000  | -2.77865000 |
| H | 1.63342500  | 0.61633200  | -3.21124500 |
| C | -2.43153800 | -1.58206600 | 0.43298700  |
| C | -2.05146500 | -2.91442700 | 0.22191500  |
| F | -0.77215200 | -3.30654400 | 0.43714700  |
| C | -2.90660100 | -3.91868600 | -0.21574400 |
| F | -2.45537600 | -5.16292900 | -0.41360600 |
| C | -4.24760600 | -3.61904200 | -0.43603400 |
| F | -5.09157600 | -4.56606100 | -0.84594500 |
| C | -4.69719700 | -2.32175100 | -0.21508200 |
| F | -5.98695900 | -2.02377100 | -0.40456700 |
| C | -3.80024300 | -1.34355400 | 0.20723100  |
| C | -1.84652400 | 1.06558400  | 0.61110100  |
| C | -1.85981700 | 2.10659700  | 1.54762700  |
| F | -1.57341100 | 1.87336100  | 2.84664800  |
| C | -2.17824600 | 3.42483700  | 1.22725100  |
| F | -2.17501600 | 4.37381300  | 2.17129100  |
| C | -2.50343900 | 3.75137900  | -0.08422000 |
| F | -2.80305800 | 5.00994700  | -0.41205500 |
| C | -2.51376300 | 2.75137100  | -1.05447100 |
| F | -2.82343700 | 3.05409600  | -2.32219200 |
| C | -2.20810200 | 1.44838400  | -0.68892400 |
| F | -2.24014600 | 0.52522700  | -1.67258200 |
| F | -4.33688400 | -0.13095500 | 0.42046500  |
| C | -0.28785800 | -0.73386400 | 2.03363800  |
| H | -0.17915900 | 0.18896900  | 2.60523700  |
| C | 1.08969900  | -1.04655400 | 1.37001200  |
| H | 0.96280300  | -2.02537300 | 0.89322800  |
| B | -1.45171900 | -0.43694600 | 0.94936800  |
| P | 1.11014400  | -0.12135000 | -0.32254000 |
| H | -4.07432700 | 0.80222800  | -4.44975600 |
| H | -3.69698200 | 1.04901600  | -3.85982900 |
| N | -0.75005700 | -1.74193900 | 3.00576600  |
| H | -0.73503100 | -2.66558900 | 2.57937100  |
| H | -0.10607800 | -1.78509800 | 3.79465300  |
| C | 2.26564600  | -1.22095700 | 2.31708200  |
| C | 3.30286700  | -2.10248700 | 1.96264400  |
| C | 2.32973400  | -0.62112300 | 3.58635200  |
| C | 4.37795800  | -2.34080800 | 2.81779800  |
| H | 3.26390000  | -2.60547600 | 1.00076700  |

|   |            |             |            |
|---|------------|-------------|------------|
| C | 3.40050300 | -0.86520600 | 4.44992500 |
| H | 1.53749400 | 0.04459700  | 3.91432300 |
| C | 4.43374500 | -1.72053800 | 4.06789000 |
| H | 5.16703300 | -3.02228000 | 2.51063100 |
| H | 3.41986700 | -0.38698300 | 5.42580400 |
| H | 5.26584200 | -1.91147200 | 4.74003500 |

## TS12L

E= -2552.246582au

|   |            |             |             |
|---|------------|-------------|-------------|
| C | 2.99937400 | -1.15220900 | -1.01753200 |
| C | 4.28580600 | -1.03786600 | -0.42843200 |
| C | 5.36008400 | -1.73741300 | -0.99188400 |
| H | 6.33998100 | -1.64099900 | -0.52865500 |
| C | 5.21828500 | -2.56100400 | -2.10940300 |
| C | 3.94478400 | -2.67947100 | -2.66744300 |
| H | 3.80327300 | -3.32123700 | -3.53461200 |
| C | 2.83964000 | -1.98946100 | -2.15592400 |
| C | 4.56881300 | -0.21670300 | 0.80812300  |
| H | 3.92852000 | -0.52046300 | 1.64193300  |
| H | 4.40721100 | 0.85184900  | 0.64133000  |
| H | 5.60711500 | -0.35507100 | 1.12487900  |
| C | 6.40478100 | -3.27976900 | -2.70627400 |
| H | 7.13956100 | -3.54659100 | -1.93896800 |
| H | 6.91986400 | -2.64806300 | -3.44246900 |
| H | 6.10107700 | -4.19719300 | -3.22149300 |
| C | 1.51241100 | -2.18490500 | -2.86373900 |
| H | 1.09278300 | -1.23659100 | -3.21586000 |
| H | 0.75369400 | -2.64884700 | -2.22131600 |
| H | 1.64059700 | -2.84011400 | -3.73097800 |
| C | 1.95787300 | 1.50120100  | -0.00967600 |
| C | 1.99127800 | 2.12918000  | 1.25735900  |
| C | 2.23756600 | 3.50642400  | 1.34295600  |
| H | 2.25447900 | 3.96712300  | 2.32866100  |
| C | 2.45249900 | 4.30164000  | 0.21882900  |
| C | 2.43615400 | 3.66953800  | -1.02599600 |
| H | 2.60631500 | 4.26129700  | -1.92298100 |
| C | 2.17784800 | 2.30303400  | -1.17010900 |
| C | 1.75035500 | 1.39745600  | 2.55298700  |
| H | 2.16119300 | 1.96254800  | 3.39592200  |
| H | 2.20846600 | 0.40931800  | 2.55845700  |
| H | 0.67884400 | 1.27098900  | 2.74707100  |
| C | 2.63878700 | 5.79515200  | 0.33414200  |
| H | 3.03239700 | 6.07822400  | 1.31597500  |

|   |              |              |              |
|---|--------------|--------------|--------------|
| H | 1. 67795500  | 6. 31061600  | 0. 20311400  |
| H | 3. 32153600  | 6. 17788700  | -0. 43227600 |
| C | 2. 11391200  | 1. 75939600  | -2. 58382100 |
| H | 2. 33349200  | 2. 55484800  | -3. 30241500 |
| H | 1. 11542100  | 1. 36817300  | -2. 81380900 |
| H | 2. 82878700  | 0. 94818300  | -2. 75726400 |
| C | -3. 22284200 | -1. 05114200 | -0. 12481900 |
| C | -3. 40196600 | -2. 33031400 | -0. 65921400 |
| F | -2. 31451200 | -3. 06993100 | -0. 99293400 |
| C | -4. 64343400 | -2. 90525400 | -0. 89850800 |
| F | -4. 74491900 | -4. 13039400 | -1. 42877200 |
| C | -5. 79255400 | -2. 18721800 | -0. 57427700 |
| F | -6. 99882900 | -2. 71871900 | -0. 78793100 |
| C | -5. 67265300 | -0. 91532600 | -0. 02413600 |
| F | -6. 77150600 | -0. 22333700 | 0. 29958800  |
| C | -4. 40567000 | -0. 37235100 | 0. 18629900  |
| C | -1. 62382600 | 1. 16253500  | -0. 03878600 |
| C | -1. 60568700 | 2. 03017900  | 1. 05797800  |
| F | -1. 75603000 | 1. 54372600  | 2. 31129400  |
| C | -1. 43459900 | 3. 40635900  | 0. 95380100  |
| F | -1. 39901100 | 4. 17472100  | 2. 04926100  |
| C | -1. 28585100 | 3. 98017200  | -0. 30412600 |
| F | -1. 08631700 | 5. 29669400  | -0. 42632600 |
| C | -1. 33557700 | 3. 16843500  | -1. 43128400 |
| F | -1. 18818500 | 3. 70431600  | -2. 64962400 |
| C | -1. 52249600 | 1. 79680000  | -1. 28185200 |
| F | -1. 55095300 | 1. 07860800  | -2. 42515300 |
| F | -4. 36846100 | 0. 85307400  | 0. 74040900  |
| C | -0. 80584800 | -1. 16366100 | 1. 24721100  |
| H | -0. 76152900 | -0. 44248100 | 2. 06841700  |
| C | 0. 67639500  | -1. 49341500 | 0. 82304000  |
| H | 0. 57153700  | -2. 28992100 | 0. 06838000  |
| B | -1. 77540700 | -0. 42636800 | 0. 16542200  |
| P | 1. 46515300  | -0. 25284400 | -0. 44553200 |
| H | -0. 55159400 | -0. 72773900 | -1. 25877800 |
| H | -1. 25997300 | -1. 05148900 | -1. 29815100 |
| C | 1. 50691500  | -2. 12186000 | 1. 93649200  |
| C | 2. 43077800  | -3. 13208800 | 1. 61435000  |
| C | 1. 35176300  | -1. 79776300 | 3. 29578100  |
| C | 3. 19506400  | -3. 76003400 | 2. 59779900  |
| H | 2. 55300200  | -3. 43011500 | 0. 57740700  |
| C | 2. 10932000  | -2. 43042300 | 4. 28411700  |
| H | 0. 62632500  | -1. 04897500 | 3. 59701800  |

|   |              |              |             |
|---|--------------|--------------|-------------|
| C | 3. 04155100  | -3. 40947900 | 3. 94023600 |
| H | 3. 90349700  | -4. 53341500 | 2. 31265000 |
| H | 1. 96230900  | -2. 15733900 | 5. 32580300 |
| H | 3. 63044600  | -3. 90220200 | 4. 70897500 |
| N | -1. 47973400 | -2. 35069400 | 1. 80670100 |
| H | -1. 51149900 | -3. 09230900 | 1. 10973500 |
| H | -0. 94290200 | -2. 71959900 | 2. 58938000 |

## L2

E= -2552.288464au

|   |              |              |              |
|---|--------------|--------------|--------------|
| C | -1. 75203200 | -2. 74115300 | 1. 53708900  |
| C | -1. 75429700 | -1. 33078500 | 1. 66644600  |
| C | -1. 79128800 | -0. 73806000 | 2. 96012400  |
| C | -1. 84673100 | -1. 56948700 | 4. 07978100  |
| C | -1. 85630600 | -2. 96219000 | 3. 97732600  |
| C | -1. 81330800 | -3. 51829700 | 2. 70028500  |
| P | -1. 68427900 | -0. 15955700 | 0. 24484700  |
| C | -1. 72849100 | 0. 75403000  | 3. 20378600  |
| C | -1. 88426400 | -3. 83207400 | 5. 20989600  |
| C | -1. 64567800 | -3. 49760900 | 0. 23159100  |
| C | -0. 76792900 | -0. 70566300 | -1. 31897700 |
| C | 0. 44542200  | 0. 28021800  | -1. 50668000 |
| B | 1. 46728100  | 0. 19596200  | -0. 18718900 |
| C | 2. 68758300  | -0. 88203400 | -0. 41181400 |
| C | 2. 58913800  | -2. 19629700 | 0. 04941700  |
| C | 3. 59634000  | -3. 15011400 | -0. 07748800 |
| C | 4. 78890500  | -2. 80179200 | -0. 70232800 |
| C | 4. 93880500  | -1. 51109900 | -1. 19861300 |
| C | 3. 89711800  | -0. 59811700 | -1. 04837400 |
| F | 1. 45075400  | -2. 62957800 | 0. 65456000  |
| F | 4. 10290300  | 0. 62539900  | -1. 59416700 |
| F | 6. 07652300  | -1. 16356200 | -1. 82156900 |
| F | 5. 77405500  | -3. 70183600 | -0. 83715100 |
| F | 3. 42740800  | -4. 39877100 | 0. 39256600  |
| C | 1. 98709700  | 1. 68116600  | 0. 29232500  |
| C | 2. 09407300  | 2. 00556300  | 1. 64835200  |
| C | 2. 49925400  | 3. 25127700  | 2. 12612000  |
| C | 2. 82876100  | 4. 25394400  | 1. 22078900  |
| C | 2. 73364500  | 3. 99164800  | -0. 14231100 |
| C | 2. 31983200  | 2. 73123600  | -0. 56834200 |
| F | 1. 76603200  | 1. 09613200  | 2. 59991300  |
| F | 2. 56768500  | 3. 49454800  | 3. 44648400  |
| F | 3. 21906500  | 5. 46121300  | 1. 65536200  |

|   |             |             |             |
|---|-------------|-------------|-------------|
| F | 3.03591200  | 4.95458300  | -1.02893600 |
| F | 2.23277700  | 2.56710800  | -1.90943200 |
| C | -3.30815700 | 0.67883400  | -0.02377800 |
| C | -4.51210800 | -0.04849800 | -0.19800400 |
| C | -5.71376700 | 0.65241800  | -0.32897900 |
| C | -5.77124600 | 2.04701300  | -0.30613300 |
| C | -4.57072000 | 2.74550100  | -0.16699300 |
| C | -3.33612300 | 2.10204800  | -0.02647200 |
| C | -4.56121400 | -1.55507400 | -0.28382600 |
| C | -7.08841400 | 2.77517600  | -0.41688200 |
| C | -2.11011300 | 2.98830400  | 0.09483900  |
| H | -0.33464300 | -1.67317600 | -1.06565200 |
| H | -1.87742200 | -1.10937300 | 5.06449000  |
| H | -1.81750100 | -4.60053800 | 2.59448300  |
| H | -4.58890200 | 3.83267600  | -0.17160000 |
| H | -6.63224500 | 0.08580600  | -0.46245500 |
| H | -1.91689600 | 0.96984200  | 4.25888100  |
| H | -0.72926100 | 1.14186900  | 2.96780100  |
| H | -2.46910100 | 1.31152300  | 2.62103600  |
| H | -2.15920900 | -3.01632400 | -0.60094300 |
| H | -0.59193000 | -3.62085300 | -0.04168900 |
| H | -2.07402700 | -4.49829800 | 0.34332600  |
| H | -0.87425800 | -3.95165400 | 5.62317300  |
| H | -2.50665700 | -3.39283200 | 5.99689600  |
| H | -2.26764600 | -4.83266700 | 4.98677000  |
| H | -2.39031700 | 4.03169900  | -0.07236900 |
| H | -1.64932700 | 2.93700500  | 1.08873900  |
| H | -1.33121500 | 2.74077200  | -0.63394100 |
| H | -6.96454700 | 3.76171700  | -0.87502400 |
| H | -7.81094200 | 2.20827400  | -1.01292200 |
| H | -7.53372300 | 2.92969000  | 0.57491600  |
| H | -4.18688200 | -2.03449900 | 0.62592300  |
| H | -5.58923800 | -1.89455200 | -0.43785500 |
| H | -3.96862600 | -1.92022700 | -1.13018800 |
| H | 0.02064700  | 1.30002600  | -1.58198600 |
| H | -0.91399100 | 0.89479700  | 0.73687100  |
| H | 0.83585600  | -0.24971300 | 0.75091000  |
| N | 1.09333200  | -0.12502400 | -2.75759800 |
| H | 2.01736100  | 0.29575500  | -2.80074300 |
| H | 0.57648400  | 0.21355400  | -3.56798100 |
| C | -1.65874800 | -0.86186600 | -2.53964600 |
| C | -1.73134600 | -2.10372700 | -3.19016900 |
| C | -2.34498100 | 0.22371700  | -3.10785100 |

|   |             |             |             |
|---|-------------|-------------|-------------|
| C | -2.48914900 | -2.26589700 | -4.35157700 |
| H | -1.16554900 | -2.94392700 | -2.79786100 |
| C | -3.10288800 | 0.06437800  | -4.26833500 |
| H | -2.28173800 | 1.20569600  | -2.64958600 |
| C | -3.18416000 | -1.18295800 | -4.89113500 |
| H | -2.52480300 | -3.23641800 | -4.83907000 |
| H | -3.62564000 | 0.91914200  | -4.68916200 |
| H | -3.77277300 | -1.30529700 | -5.79619500 |

### L3

E= -2740.87038au

|   |             |             |             |
|---|-------------|-------------|-------------|
| C | -2.15794500 | 2.87931800  | -0.48566100 |
| C | -2.09968600 | 1.62513100  | -1.14154600 |
| C | -2.20137500 | 1.56431600  | -2.56025700 |
| C | -2.37215300 | 2.75161500  | -3.27481500 |
| C | -2.44536600 | 3.99753400  | -2.64929600 |
| C | -2.33365600 | 4.03210900  | -1.26026500 |
| P | -1.88272600 | 0.00525700  | -0.28486900 |
| C | 1.87233800  | 2.26539100  | -2.93622100 |
| O | 2.72275500  | 2.92036400  | -2.47685200 |
| C | -2.10409200 | 0.28281100  | -3.35800800 |
| C | -2.66004600 | 5.25891300  | -3.44929500 |
| C | -2.00226200 | 3.08761900  | 1.00287400  |
| C | -0.98252100 | -0.04805600 | 1.37804200  |
| C | 0.22670300  | -1.06307000 | 1.25202300  |
| B | 1.38892900  | -0.48430700 | 0.21636500  |
| O | 1.01564500  | 1.63760800  | -3.42927100 |
| C | 2.30018700  | 0.67055700  | 0.95247300  |
| C | 2.06301600  | 2.03248100  | 0.77802800  |
| C | 2.81259500  | 3.04484300  | 1.37242500  |
| C | 3.88049000  | 2.70214700  | 2.19397900  |
| C | 4.16532500  | 1.35624900  | 2.40923900  |
| C | 3.37763100  | 0.38714200  | 1.79400000  |
| F | 1.02378400  | 2.45306900  | -0.00056800 |
| F | 3.70219900  | -0.90276900 | 2.06408800  |
| F | 5.18682700  | 1.01197500  | 3.20931800  |
| F | 4.61871000  | 3.65496600  | 2.78179900  |
| F | 2.51077700  | 4.33862700  | 1.16715900  |
| C | 2.33943400  | -1.63717500 | -0.47285500 |
| C | 3.15256600  | -1.27919000 | -1.55357700 |
| C | 3.96927300  | -2.16422900 | -2.25177000 |
| C | 4.00686600  | -3.50109800 | -1.86658800 |
| C | 3.22698600  | -3.91475900 | -0.79328400 |

|   |             |             |             |
|---|-------------|-------------|-------------|
| C | 2.42757800  | -2.98608900 | -0.12648400 |
| F | 3.17650000  | 0.00707500  | -1.98018900 |
| F | 4.71690900  | -1.74643000 | -3.28661700 |
| F | 4.78271900  | -4.37651900 | -2.52283400 |
| F | 3.25214200  | -5.20160400 | -0.40602600 |
| F | 1.70947100  | -3.48322400 | 0.91327400  |
| C | -3.42133000 | -1.00713000 | -0.38819300 |
| C | -4.66859800 | -0.50143500 | 0.05656500  |
| C | -5.80868100 | -1.29753200 | -0.08376200 |
| C | -5.76202500 | -2.57708800 | -0.63955000 |
| C | -4.51946600 | -3.06450600 | -1.04998900 |
| C | -3.34239800 | -2.31623100 | -0.94063300 |
| C | -4.82743100 | 0.85319400  | 0.70551700  |
| C | -7.01408000 | -3.40325100 | -0.80473500 |
| C | -2.06014200 | -2.97438900 | -1.41335000 |
| H | -0.54626800 | 0.94537700  | 1.48895600  |
| H | -2.44210600 | 2.69631700  | -4.35830800 |
| H | -2.37521100 | 4.99120100  | -0.74961100 |
| H | -4.45726200 | -4.06674400 | -1.46717500 |
| H | -6.76102000 | -0.90391400 | 0.26336400  |
| H | -2.31925600 | 0.48072300  | -4.41126700 |
| H | -1.09028800 | -0.13362600 | -3.31220700 |
| H | -2.81072900 | -0.48067700 | -3.01722000 |
| H | -2.47602200 | 2.31220200  | 1.60582000  |
| H | -0.93912100 | 3.12439200  | 1.26430400  |
| H | -2.44424100 | 4.04460500  | 1.29545700  |
| H | -2.15949800 | 5.20498900  | -4.42173500 |
| H | -3.72855000 | 5.42345100  | -3.64222900 |
| H | -2.28333200 | 6.13889200  | -2.91875000 |
| H | -2.25941700 | -4.01010000 | -1.70055800 |
| H | -1.63204800 | -2.47541300 | -2.29099400 |
| H | -1.28389600 | -2.99527200 | -0.64160300 |
| H | -6.80372400 | -4.47340500 | -0.70810000 |
| H | -7.77288100 | -3.13431200 | -0.06300500 |
| H | -7.45696800 | -3.24707200 | -1.79732800 |
| H | -4.55712400 | 1.66959400  | 0.02838500  |
| H | -5.86522800 | 1.00752400  | 1.01351800  |
| H | -4.20652000 | 0.93732100  | 1.60416300  |
| H | -0.18553200 | -2.00810800 | 0.85486100  |
| H | -1.01313400 | -0.67768200 | -1.14080900 |
| H | 0.83588700  | 0.06556400  | -0.72087600 |
| N | 0.73240700  | -1.22706500 | 2.61734100  |
| H | 0.17456700  | -1.89116400 | 3.15013900  |

|   |             |             |            |
|---|-------------|-------------|------------|
| H | 1.68270000  | -1.58228900 | 2.59113800 |
| C | -1.89701700 | -0.32266700 | 2.56214900 |
| C | -1.96731400 | 0.60359600  | 3.61412800 |
| C | -2.60003600 | -1.53092700 | 2.69698700 |
| C | -2.74304200 | 0.35095100  | 4.74684100 |
| H | -1.38417400 | 1.51813900  | 3.55785900 |
| C | -3.37570900 | -1.78631000 | 3.82862700 |
| H | -2.53533600 | -2.28598300 | 1.91984100 |
| C | -3.45727000 | -0.84294300 | 4.85490600 |
| H | -2.77617300 | 1.08277500  | 5.54940900 |
| H | -3.91087100 | -2.72863900 | 3.91003900 |
| H | -4.05947600 | -1.04385000 | 5.73668200 |

### TS34L

E= -2740.825368au

|   |             |             |             |
|---|-------------|-------------|-------------|
| C | -3.02352700 | 2.58632800  | -0.56997500 |
| C | -2.82996200 | 1.31171000  | -1.15495000 |
| C | -3.33182300 | 1.06296800  | -2.46747800 |
| C | -4.01411700 | 2.08680800  | -3.13167900 |
| C | -4.20766200 | 3.35087500  | -2.57480400 |
| C | -3.70721700 | 3.57075600  | -1.29360000 |
| P | -1.87571200 | -0.10747700 | -0.41790100 |
| C | 1.16807400  | -0.27608900 | -2.59962000 |
| O | 2.15766600  | -0.31447100 | -3.30655500 |
| C | -3.16956500 | -0.24460600 | -3.21410500 |
| C | -4.91118400 | 4.44255700  | -3.34341400 |
| C | -2.52881800 | 2.99014100  | 0.79792700  |
| C | -0.82928200 | 0.18298900  | 1.15984000  |
| C | 0.51130100  | -0.63831200 | 1.04747400  |
| B | 1.83338000  | -0.14699200 | 0.26194100  |
| O | -0.06006400 | -0.50929100 | -2.82206500 |
| C | 2.24004600  | 1.38895700  | 0.47564400  |
| C | 1.48125100  | 2.45956200  | 0.00058500  |
| C | 1.79248600  | 3.79562200  | 0.23585500  |
| C | 2.92997100  | 4.10675400  | 0.97370500  |
| C | 3.72893000  | 3.07628700  | 1.46363900  |
| C | 3.37748300  | 1.75322300  | 1.20795600  |
| F | 0.36051400  | 2.23011000  | -0.72776300 |
| F | 4.18534800  | 0.80778100  | 1.71328100  |
| F | 4.82192900  | 3.36707600  | 2.17972200  |
| F | 3.24697700  | 5.38111700  | 1.21974500  |
| F | 0.99622000  | 4.77180400  | -0.22348500 |
| C | 2.94194000  | -1.19998000 | -0.17557100 |





|   |             |             |             |                           |             |             |             |
|---|-------------|-------------|-------------|---------------------------|-------------|-------------|-------------|
| F | 4.52905600  | 3.25473000  | 2.99423800  | H                         | -4.88099500 | 1.00208600  | 0.31907700  |
| F | 3.39994200  | 5.17010500  | 1.40454900  | H                         | -5.56518100 | 0.17296400  | 1.72475000  |
| F | 1.53552900  | 4.46079700  | -0.46390700 | H                         | -3.85431200 | 0.60414100  | 1.69557400  |
| C | 2.98193100  | -1.29900000 | -0.00371600 | H                         | 0.22511400  | -1.90581600 | 0.59795500  |
| C | 3.44560400  | -0.88141200 | -1.25528000 | H                         | -0.10388700 | -0.60173600 | -2.19376700 |
| C | 4.33976300  | -1.60937900 | -2.03494700 | H                         | 0.68281400  | 1.11770800  | -3.19789900 |
| C | 4.80872900  | -2.83337700 | -1.56460800 | N                         | 1.36580800  | -1.02256300 | 2.15712600  |
| C | 4.37407100  | -3.30112200 | -0.32849300 | H                         | 1.14075500  | -0.42735800 | 2.95040700  |
| C | 3.48323200  | -2.53269900 | 0.41618000  | H                         | 1.64173300  | -1.95817100 | 2.43826900  |
| F | 3.01643300  | 0.29244200  | -1.76487500 | C                         | -1.49480500 | -0.43539000 | 2.51911100  |
| F | 4.74894000  | -1.14833400 | -3.21892000 | C                         | -1.50276500 | 0.48258600  | 3.58412600  |
| F | 5.66732700  | -3.55316200 | -2.29223400 | C                         | -1.99546500 | -1.72632400 | 2.76375700  |
| F | 4.81559300  | -4.47684800 | 0.13739700  | C                         | -2.02467700 | 0.14111600  | 4.83506400  |
| F | 3.10651900  | -3.06720400 | 1.61282500  | H                         | -1.09366500 | 1.47904800  | 3.43586100  |
| C | -3.16307700 | -1.40550300 | -0.20212400 | C                         | -2.51744300 | -2.06841400 | 4.01086900  |
| C | -4.37775300 | -1.10402600 | 0.46684000  | H                         | -1.98676100 | -2.46906400 | 1.97336400  |
| C | -5.36098500 | -2.09471200 | 0.58139500  | C                         | -2.53992100 | -1.13613600 | 5.05145000  |
| C | -5.19487000 | -3.37912700 | 0.06349600  | H                         | -2.02077900 | 0.87409300  | 5.63742800  |
| C | -3.99170400 | -3.66501700 | -0.58421500 | H                         | -2.90658600 | -3.07052100 | 4.16993100  |
| C | -2.97877700 | -2.71090600 | -0.73632300 | H                         | -2.94699700 | -1.40692100 | 6.02165500  |
| C | -4.68262900 | 0.24219300  | 1.08140300  |                           |             |             |             |
| C | -6.28539400 | -4.41731200 | 0.17949800  |                           |             |             |             |
| C | -1.73144400 | -3.14523300 | -1.48210100 |                           |             |             |             |
| H | -0.51256000 | 0.98420900  | 1.27308400  |                           |             |             |             |
| H | -4.21484500 | 2.33013700  | -3.91400700 |                           |             |             |             |
| H | -3.24883800 | 4.72774300  | -0.51376000 |                           |             |             |             |
| H | -3.83408600 | -4.66110400 | -0.99239600 |                           |             |             |             |
| H | -6.28502300 | -1.85003100 | 1.10128700  |                           |             |             |             |
| H | -3.60543900 | 0.23451000  | -4.14896300 |                           |             |             |             |
| H | -2.19480500 | -0.37681200 | -3.28469600 |                           |             |             |             |
| H | -3.81433700 | -0.74489000 | -2.69367500 |                           |             |             |             |
| H | -2.36611400 | 2.22218000  | 1.72748200  |                           |             |             |             |
| H | -0.96533900 | 2.98474100  | 0.95168600  |                           |             |             |             |
| H | -2.39166000 | 3.93855400  | 1.33562700  |                           |             |             |             |
| H | -3.79421200 | 5.24998100  | -3.78493100 |                           |             |             |             |
| H | -5.40578500 | 4.63811500  | -3.41019300 |                           |             |             |             |
| H | -4.57563100 | 5.70811900  | -2.26624300 |                           |             |             |             |
| H | -1.82138800 | -4.19296500 | -1.78484300 |                           |             |             |             |
| H | -1.55575300 | -2.55388900 | -2.38558600 |                           |             |             |             |
| H | -0.82276100 | -3.06225700 | -0.87640800 |                           |             |             |             |
| H | -5.87121300 | -5.42915500 | 0.24506300  |                           |             |             |             |
| H | -6.91016400 | -4.24576500 | 1.06237100  |                           |             |             |             |
| H | -6.94686900 | -4.39397800 | -0.69692000 |                           |             |             |             |
|   |             |             |             | <b>M</b>                  |             |             |             |
|   |             |             |             | <b>E= -2359.387324 au</b> |             |             |             |
|   |             |             |             | C                         | 2.85240800  | 2.40275700  | -0.16370400 |
|   |             |             |             | C                         | 2.82633600  | 1.16481300  | 0.52896100  |
|   |             |             |             | C                         | 3.46777400  | 1.09715900  | 1.80165700  |
|   |             |             |             | C                         | 4.12382000  | 2.21954800  | 2.31572000  |
|   |             |             |             | C                         | 4.15432900  | 3.43998700  | 1.64157200  |
|   |             |             |             | C                         | 3.51136900  | 3.50053900  | 0.40733500  |
|   |             |             |             | P                         | 1.90552000  | -0.41807200 | 0.11856300  |
|   |             |             |             | C                         | 3.48182200  | -0.15637300 | 2.65352200  |
|   |             |             |             | C                         | 4.83242500  | 4.65040700  | 2.23782800  |
|   |             |             |             | C                         | 2.22170200  | 2.65658400  | -1.51765500 |
|   |             |             |             | C                         | 0.85036800  | -0.25723500 | -1.49408000 |
|   |             |             |             | C                         | -0.45880600 | -0.97341000 | -1.17015100 |
|   |             |             |             | B                         | -1.85721500 | -0.34861400 | -0.76586400 |
|   |             |             |             | C                         | -2.10942900 | 1.23556500  | -0.72169000 |
|   |             |             |             | C                         | -1.42322300 | 2.11471900  | 0.11759800  |
|   |             |             |             | C                         | -1.71373500 | 3.47681500  | 0.19005600  |
|   |             |             |             | C                         | -2.73003700 | 4.00258900  | -0.60366400 |
|   |             |             |             | C                         | -3.44215200 | 3.16401800  | -1.45797000 |
|   |             |             |             | C                         | -3.12022800 | 1.81033300  | -1.49575500 |
|   |             |             |             | F                         | -0.42579900 | 1.66426500  | 0.89898600  |

|   |             |             |             |
|---|-------------|-------------|-------------|
| F | -3.83471800 | 1.03073800  | -2.33834300 |
| F | -4.41777300 | 3.66418000  | -2.22827600 |
| F | -3.01810500 | 5.30705200  | -0.54965200 |
| F | -1.02463700 | 4.28290100  | 1.00735000  |
| C | -2.88752400 | -1.25646100 | 0.07019700  |
| C | -2.96700700 | -1.09999300 | 1.45724600  |
| C | -3.82968600 | -1.83552400 | 2.26515400  |
| C | -4.66124900 | -2.78991200 | 1.68340000  |
| C | -4.61491100 | -2.98895600 | 0.30740900  |
| C | -3.74088700 | -2.22317400 | -0.46155200 |
| F | -2.17811400 | -0.19472200 | 2.06610300  |
| F | -3.86423000 | -1.64055800 | 3.58932500  |
| F | -5.49468600 | -3.51026000 | 2.44128300  |
| F | -5.40645400 | -3.90594200 | -0.26517100 |
| F | -3.74997700 | -2.47905900 | -1.79841600 |
| C | 3.22097400  | -1.68688800 | -0.33798500 |
| C | 4.45553200  | -1.42249600 | -0.99196400 |
| C | 5.35063100  | -2.47261600 | -1.22935300 |
| C | 5.08914000  | -3.78709100 | -0.83986600 |
| C | 3.88098700  | -4.03602900 | -0.19159600 |
| C | 2.95049200  | -3.02234600 | 0.07203800  |
| C | 4.89746100  | -0.04859300 | -1.44606600 |
| C | 6.09283200  | -4.88877300 | -1.08542300 |
| C | 1.68028300  | -3.43905100 | 0.79028900  |
| H | 0.62634800  | 0.80320800  | -1.61095100 |
| H | 4.61635900  | 2.13466700  | 3.28242400  |
| H | 3.52469900  | 4.43806700  | -0.14519600 |
| H | 3.65070900  | -5.05040800 | 0.12841600  |
| H | 6.28647600  | -2.25059700 | -1.73918100 |
| H | 3.94611100  | 0.05018400  | 3.62277500  |
| H | 2.46635200  | -0.52810900 | 2.83546800  |
| H | 4.04109400  | -0.97413900 | 2.18494100  |
| H | 2.43088700  | 1.86552100  | -2.24271400 |
| H | 1.13243200  | 2.76715800  | -1.44767400 |
| H | 2.60535300  | 3.59070000  | -1.93927900 |
| H | 4.17417100  | 5.16190700  | 2.95293600  |
| H | 5.74406500  | 4.37411400  | 2.77941500  |
| H | 5.10349700  | 5.37891800  | 1.46627900  |
| H | 1.82261600  | -4.40830500 | 1.27914100  |
| H | 1.36956400  | -2.71013100 | 1.54315700  |
| H | 0.83737600  | -3.55546700 | 0.09646100  |
| H | 5.61516300  | -5.87410500 | -1.08629800 |
| H | 6.60522800  | -4.75791800 | -2.04511100 |

|   |             |             |             |
|---|-------------|-------------|-------------|
| H | 6.86628900  | -4.90099200 | -0.30576300 |
| H | 5.24899800  | 0.56004600  | -0.60606900 |
| H | 5.72102600  | -0.13514300 | -2.16223000 |
| H | 4.09527600  | 0.51532700  | -1.92445200 |
| H | -0.32074600 | -2.02456700 | -0.92205700 |
| N | -1.53756000 | -0.88400700 | -2.24311200 |
| H | -1.96173700 | -1.74179200 | -2.58189600 |
| H | -1.38709800 | -0.20516200 | -2.98309600 |
| C | 1.48870400  | -0.79646600 | -2.78414600 |
| H | 2.39724900  | -0.25154700 | -3.05348200 |
| H | 1.75956400  | -1.85216700 | -2.68263500 |
| H | 0.79621200  | -0.71109000 | -3.63354900 |

### M1

E= -2360.543716 au

|   |             |             |             |
|---|-------------|-------------|-------------|
| C | -2.23163100 | 2.33273500  | -0.16294200 |
| C | -3.57872200 | 2.51517900  | 0.24618600  |
| C | -4.24775900 | 3.69543900  | -0.10236000 |
| H | -5.27871000 | 3.82192600  | 0.22267000  |
| C | -3.64452000 | 4.70767000  | -0.84952000 |
| C | -2.32935800 | 4.50447100  | -1.26735200 |
| H | -1.83997200 | 5.26827900  | -1.86829100 |
| C | -1.61398700 | 3.34467800  | -0.94660600 |
| C | -4.36567400 | 1.48975200  | 1.03141900  |
| H | -3.80927800 | 1.11317500  | 1.89244100  |
| H | -4.62764200 | 0.62271100  | 0.41638900  |
| H | -5.29624000 | 1.93008200  | 1.40336200  |
| C | -4.38272700 | 5.98364700  | -1.17802000 |
| H | -4.24883200 | 6.73316800  | -0.38626600 |
| H | -5.45931700 | 5.80996500  | -1.28056700 |
| H | -4.01894400 | 6.42854100  | -2.11032500 |
| C | -0.19762000 | 3.23579700  | -1.47542200 |
| H | 0.00329100  | 4.04638000  | -2.18330100 |
| H | -0.02468600 | 2.28466700  | -1.98789700 |
| H | 0.54749500  | 3.30687800  | -0.67740600 |
| C | -2.28118900 | -0.66148700 | 0.00852400  |
| C | -2.74255600 | -1.59914700 | 0.96609800  |
| C | -3.46953200 | -2.72157500 | 0.54317600  |
| H | -3.81110600 | -3.42779800 | 1.29714500  |
| C | -3.77558000 | -2.96322300 | -0.79410900 |
| C | -3.30314700 | -2.04365300 | -1.73146800 |
| H | -3.50450800 | -2.21208200 | -2.78747800 |
| C | -2.55635500 | -0.91856400 | -1.36890800 |

|   |             |             |             |
|---|-------------|-------------|-------------|
| C | -2.53224900 | -1.47005500 | 2.45675200  |
| H | -2.86197700 | -2.38055200 | 2.96601100  |
| H | -3.11171500 | -0.63955600 | 2.87405000  |
| H | -1.48689600 | -1.31134200 | 2.72649900  |
| C | -4.59045100 | -4.16311500 | -1.21420800 |
| H | -4.60192200 | -4.93204700 | -0.43499600 |
| H | -4.19502800 | -4.61509300 | -2.13088400 |
| H | -5.63328900 | -3.88398500 | -1.41629800 |
| C | -2.05434900 | -0.03805900 | -2.49602400 |
| H | -2.35295500 | -0.45742100 | -3.46159800 |
| H | -0.96100200 | 0.03469800  | -2.48770800 |
| H | -2.44999700 | 0.98137100  | -2.44007200 |
| C | 2.76859400  | 0.51478800  | 0.44833800  |
| C | 2.98760300  | 1.89931900  | 0.46493800  |
| F | 2.05870100  | 2.73540100  | 0.98697800  |
| C | 4.12032800  | 2.52175200  | -0.04481300 |
| F | 4.24386000  | 3.85361600  | -0.01027200 |
| C | 5.13667900  | 1.74080600  | -0.58780700 |
| F | 6.23733300  | 2.31327800  | -1.07499200 |
| C | 4.99261000  | 0.35756800  | -0.61161000 |
| F | 5.96861300  | -0.40407300 | -1.11697900 |
| C | 3.83213300  | -0.22243200 | -0.10497300 |
| C | 1.09561400  | -1.62601600 | 0.48895400  |
| C | 0.81128200  | -2.72762400 | 1.30514200  |
| F | 0.90705500  | -2.63168200 | 2.64732400  |
| C | 0.44634800  | -3.97632000 | 0.80622200  |
| F | 0.19455700  | -4.99499200 | 1.63777900  |
| C | 0.34522300  | -4.16062400 | -0.56840700 |
| F | -0.01344600 | -5.34624600 | -1.06548700 |
| C | 0.62308900  | -3.09697400 | -1.42453500 |
| F | 0.52512500  | -3.26427100 | -2.74998500 |
| C | 1.00525000  | -1.87578500 | -0.88747200 |
| F | 1.26602100  | -0.88456500 | -1.76353200 |
| F | 3.79483100  | -1.56398500 | -0.14901700 |
| C | 0.69569800  | 0.37815200  | 2.33954200  |
| H | 0.28830700  | -0.50108400 | 2.84402700  |
| C | -0.50873800 | 1.30720100  | 1.97800200  |
| H | -0.05042500 | 2.24302100  | 1.63161900  |
| B | 1.47733300  | -0.18934400 | 1.04702300  |
| P | -1.17469500 | 0.83632700  | 0.25713700  |
| H | 2.19332200  | -1.38211800 | -4.94234400 |
| H | 1.87190500  | -1.55781500 | -4.29647400 |
| N | 1.65467800  | 0.95166800  | 3.30548700  |

|   |             |            |            |
|---|-------------|------------|------------|
| H | 1.93134100  | 1.88725600 | 3.01785200 |
| H | 1.22688900  | 1.04071900 | 4.22524600 |
| C | -1.39087000 | 1.69341300 | 3.16984200 |
| H | -1.86918200 | 0.83440900 | 3.64521500 |
| H | -0.77632400 | 2.18989900 | 3.93219600 |
| H | -2.16609100 | 2.40525700 | 2.87077800 |

### TS12M

E= -2360.516336 au

|   |            |             |             |
|---|------------|-------------|-------------|
| C | 2.93692200 | -2.03793900 | -0.13489800 |
| C | 4.19612600 | -2.02333400 | 0.51900200  |
| C | 5.11846700 | -3.04383500 | 0.25331800  |
| H | 6.07713300 | -3.02193100 | 0.76790400  |
| C | 4.85231100 | -4.08399100 | -0.63724500 |
| C | 3.61019900 | -4.08728800 | -1.27310400 |
| H | 3.37438600 | -4.88786900 | -1.97123700 |
| C | 2.65544900 | -3.08892100 | -1.05108000 |
| C | 4.61900500 | -0.95517200 | 1.50178600  |
| H | 3.85014700 | -0.76427900 | 2.25450200  |
| H | 4.82414000 | -0.00124600 | 1.00545000  |
| H | 5.52932300 | -1.26263600 | 2.02599900  |
| C | 5.88130600 | -5.15195300 | -0.92312800 |
| H | 5.40912400 | -6.10074800 | -1.19940000 |
| H | 6.52463100 | -5.33170800 | -0.05512300 |
| H | 6.53451200 | -4.85920900 | -1.75625400 |
| C | 1.35435000 | -3.18970500 | -1.82346800 |
| H | 1.15065200 | -2.27925100 | -2.39718500 |
| H | 0.48630700 | -3.35738300 | -1.17376700 |
| H | 1.39554100 | -4.02932000 | -2.52433200 |
| C | 2.39137600 | 0.91712000  | 0.26732800  |
| C | 2.44536100 | 1.76583300  | 1.40108400  |
| C | 3.00959100 | 3.04318800  | 1.28039100  |
| H | 3.04102600 | 3.67856300  | 2.16303800  |
| C | 3.53247000 | 3.52734300  | 0.08235800  |
| C | 3.46933000 | 2.68635500  | -1.02917900 |
| H | 3.85890800 | 3.03693600  | -1.98265600 |
| C | 2.89652100 | 1.41187300  | -0.97192900 |
| C | 1.94528900 | 1.38399400  | 2.77467500  |
| H | 1.99136800 | 2.24519500  | 3.44766900  |
| H | 2.55341000 | 0.59060900  | 3.22294700  |
| H | 0.90980900 | 1.03990200  | 2.76294200  |
| C | 4.10156000 | 4.92214300  | -0.02056600 |
| H | 4.45232300 | 5.28522200  | 0.95117900  |

|   |             |             |             |
|---|-------------|-------------|-------------|
| H | 3.34312200  | 5.63044600  | -0.38013400 |
| H | 4.94114700  | 4.96275000  | -0.72315900 |
| C | 2.82308800  | 0.62946400  | -2.26891600 |
| H | 3.27174300  | 1.20720500  | -3.08281400 |
| H | 1.78324100  | 0.41397700  | -2.54363800 |
| H | 3.34827400  | -0.33029400 | -2.21463300 |
| C | -3.16208700 | -0.78241600 | 0.13957600  |
| C | -3.47978200 | -2.13377400 | -0.03022000 |
| F | -2.48680200 | -3.05845200 | -0.00901400 |
| C | -4.76626900 | -2.60817600 | -0.24914100 |
| F | -4.99923100 | -3.91553400 | -0.42004800 |
| C | -5.82239100 | -1.69976600 | -0.28700600 |
| F | -7.07034800 | -2.12966000 | -0.48956900 |
| C | -5.56562200 | -0.34433400 | -0.11063300 |
| F | -6.57481700 | 0.53417500  | -0.13755900 |
| C | -4.25558300 | 0.08889900  | 0.09313000  |
| C | -1.26730100 | 1.18394600  | -0.09662100 |
| C | -1.22871000 | 2.25974300  | 0.79738400  |
| F | -1.55785700 | 2.07237000  | 2.09454400  |
| C | -0.87845100 | 3.55582100  | 0.43367200  |
| F | -0.85670400 | 4.53800200  | 1.34314000  |
| C | -0.55145700 | 3.82690700  | -0.89112800 |
| F | -0.19894700 | 5.06187800  | -1.26047300 |
| C | -0.59631700 | 2.79851200  | -1.82559100 |
| F | -0.28320100 | 3.04120600  | -3.10498600 |
| C | -0.96719200 | 1.51838300  | -1.42168900 |
| F | -0.98618500 | 0.57955600  | -2.39178100 |
| F | -4.09057100 | 1.41165400  | 0.27107200  |
| C | -0.86672800 | -0.87189400 | 1.71799900  |
| H | -0.70592000 | 0.01586400  | 2.33704000  |
| C | 0.54250500  | -1.53393500 | 1.48178600  |
| H | 0.32597800  | -2.46769700 | 0.93510300  |
| B | -1.66483300 | -0.28744000 | 0.42096700  |
| P | 1.58331700  | -0.76022600 | 0.07533600  |
| H | -0.42919200 | -1.06060800 | -0.80119300 |
| H | -1.17795500 | -1.27413600 | -0.83680500 |
| N | -1.75973900 | -1.72763900 | 2.52369000  |
| H | -1.85880600 | -2.64376200 | 2.09152700  |
| H | -1.37305900 | -1.87897100 | 3.45237600  |
| C | 1.22795200  | -1.97250600 | 2.78618600  |
| H | 1.35158700  | -1.14791500 | 3.49237100  |
| H | 0.63311500  | -2.74661300 | 3.28477300  |
| H | 2.21081100  | -2.40727600 | 2.58409300  |

## M2

E= -2360.558095 au

|   |             |             |             |
|---|-------------|-------------|-------------|
| C | -1.92210700 | -2.96474500 | 0.44229500  |
| C | -2.04035700 | -1.60014300 | 0.80218100  |
| C | -2.24814100 | -1.23785700 | 2.16176700  |
| C | -2.34857500 | -2.24919200 | 3.11843000  |
| C | -2.24154300 | -3.60212500 | 2.78844600  |
| C | -2.03544800 | -3.93043500 | 1.44918700  |
| P | -1.91561100 | -0.21030100 | -0.39505500 |
| C | -2.31815600 | 0.19423000  | 2.64667000  |
| C | -2.31987000 | -4.66921200 | 3.85243100  |
| C | -1.63980400 | -3.47883600 | -0.95294900 |
| C | -0.83049200 | -0.41740800 | -1.91673100 |
| C | 0.37727400  | 0.57345100  | -1.77637900 |
| B | 1.24351000  | 0.23727000  | -0.39103600 |
| C | 2.49995000  | -0.79553900 | -0.64556200 |
| C | 2.41100100  | -2.15509600 | -0.33715800 |
| C | 3.45504400  | -3.06474600 | -0.49438200 |
| C | 4.67790100  | -2.62253900 | -0.98644100 |
| C | 4.82366900  | -1.28073300 | -1.32313200 |
| C | 3.74617000  | -0.41569800 | -1.14847600 |
| F | 1.25207700  | -2.68224300 | 0.13624300  |
| F | 3.95519900  | 0.86946100  | -1.53093500 |
| F | 5.99178700  | -0.83823900 | -1.81537500 |
| F | 5.69669300  | -3.47944300 | -1.14671600 |
| F | 3.29219300  | -4.36102700 | -0.17659700 |
| C | 1.69868400  | 1.59898700  | 0.41319500  |
| C | 1.66675900  | 1.65232400  | 1.81037500  |
| C | 2.01677500  | 2.77457400  | 2.55984900  |
| C | 2.43145900  | 3.92873200  | 1.90425000  |
| C | 2.47430500  | 3.93781900  | 0.51384800  |
| C | 2.11078500  | 2.79097000  | -0.18946400 |
| F | 1.24765900  | 0.58039500  | 2.52765100  |
| F | 1.95056200  | 2.75574600  | 3.90253800  |
| F | 2.77201500  | 5.02259600  | 2.60146800  |
| F | 2.85871400  | 5.05091500  | -0.13285800 |
| F | 2.15583600  | 2.89427100  | -1.53846200 |
| C | -3.56451000 | 0.54891200  | -0.76378100 |
| C | -4.70936600 | -0.21742100 | -1.10324200 |
| C | -5.91789400 | 0.44166800  | -1.34765100 |
| C | -6.04332900 | 1.82975700  | -1.27626800 |
| C | -4.90333800 | 2.56738800  | -0.95602200 |

C -3.66648100 1.96734100 -0.69553000  
 C -4.70632500 -1.72330900 -1.23600400  
 C -7.36968600 2.50778200 -1.51779100  
 C -2.51536800 2.89447800 -0.35508800  
 H -0.41613100 -1.42460500 -1.85958100  
 H -2.50871900 -1.96651400 4.15611100  
 H -1.94865100 -4.97753500 1.16904000  
 H -4.97178400 3.65147200 -0.90707100  
 H -6.78876800 -0.15534600 -1.60786700  
 H -2.65131200 0.22254100 3.68760900  
 H -1.32412000 0.65855200 2.61157700  
 H -3.01387700 0.80965600 2.06594500  
 H -2.09954600 -2.88651400 -1.74562000  
 H -0.55916500 -3.49923500 -1.12742500  
 H -2.00936700 -4.50345400 -1.05686100  
 H -1.34472400 -4.80372000 4.33841600  
 H -3.03843500 -4.40342800 4.63512400  
 H -2.61213000 -5.63625800 3.43124700  
 H -2.82825200 3.93482500 -0.47668700  
 H -2.18126400 2.78090800 0.68392300  
 H -1.64035200 2.74165900 -0.99463100  
 H -7.23639100 3.51720000 -1.92002100  
 H -7.98946900 1.93860600 -2.21817200  
 H -7.93683400 2.60164800 -0.58219200  
 H -4.37388400 -2.22116800 -0.32128000  
 H -5.71271100 -2.08416700 -1.46527000  
 H -4.05453000 -2.05889400 -2.05043600  
 H -0.05371800 1.58830700 -1.69080700  
 H -1.30556300 0.80708900 0.34223700  
 H 0.50152300 -0.35758600 0.36754000  
 N 1.15779600 0.44993600 -3.01702900  
 H 2.11371300 0.74320200 -2.83973400  
 H 0.80264900 1.07881900 -3.73539100  
 C -1.63304300 -0.26654900 -3.21691400  
 H -2.44018000 -1.00105000 -3.31513100  
 H -2.07651600 0.73106300 -3.31231600  
 H -0.93974700 -0.42032600 -4.04842700

**M3**

E= -2549.140375 au

C -2.38248400 -2.73328800 -0.01662800  
 C -2.43141500 -1.44603800 0.57174300  
 C -2.72679900 -1.30936500 1.95772400

C -2.96658300 -2.45909300 2.71138900  
 C -2.92646100 -3.73934000 2.15350800  
 C -2.63526300 -3.84643100 0.79466800  
 P -2.11576000 0.12294100 -0.33676900  
 C 1.15258300 -1.95381100 2.99267700  
 O 1.94865200 -2.75531600 2.69802600  
 C -2.76595900 0.02065300 2.67851700  
 C -3.21070300 -4.96040400 2.99362900  
 C -2.04290300 -3.02447000 -1.46220600  
 C -1.03120800 0.10098400 -1.86859500  
 C 0.19164000 1.07071700 -1.62435800  
 B 1.19963900 0.48727300 -0.44442600  
 O 0.34132600 -1.17631600 3.32260200  
 C 2.16160300 -0.72303600 -1.01300100  
 C 1.88985000 -2.06987300 -0.77547900  
 C 2.68705700 -3.12314600 -1.21781600  
 C 3.84445600 -2.84304000 -1.93542700  
 C 4.17225700 -1.51631800 -2.20055200  
 C 3.33480000 -0.50477200 -1.73826800  
 F 0.77366700 -2.43343600 -0.08420400  
 F 3.71380200 0.76473100 -2.04290900  
 F 5.28319600 -1.23091800 -2.89762700  
 F 4.62813900 -3.83734300 -2.37661000  
 F 2.34714400 -4.39850500 -0.96440800  
 C 2.10357100 1.63196800 0.31954300  
 C 2.81542600 1.26863700 1.46800100  
 C 3.57985400 2.14476100 2.23289200  
 C 3.66826700 3.47983000 1.84961100  
 C 2.98900500 3.89934200 0.71238400  
 C 2.23774500 2.97921200 -0.01973900  
 F 2.78510100 -0.01707700 1.89768000  
 F 4.22923900 1.72039300 3.32941700  
 F 4.39536700 4.34762500 2.56869900  
 F 3.06325100 5.18464800 0.32610100  
 F 1.61784100 3.48740000 -1.11602700  
 C -3.66566100 1.10923800 -0.54765800  
 C -4.86089300 0.53283900 -1.05292100  
 C -5.99635000 1.33666500 -1.18308700  
 C -6.00253600 2.68825100 -0.83213900  
 C -4.81820400 3.23551900 -0.33973500  
 C -3.64713200 2.48429700 -0.18391200  
 C -4.99078400 -0.91793800 -1.46000700  
 C -7.25522500 3.51975800 -0.96174800

|   |             |             |             |   |             |             |             |
|---|-------------|-------------|-------------|---|-------------|-------------|-------------|
| C | -2.43983500 | 3.20841100  | 0.37943600  | P | 2.03841800  | -0.23379400 | -0.06383200 |
| H | -0.63172300 | -0.91172700 | -1.94178500 | C | -0.79428200 | -0.32628500 | 2.33798600  |
| H | -3.18504200 | -2.34701800 | 3.77061500  | O | -1.73489700 | -0.33426100 | 3.10862700  |
| H | -2.59280300 | -4.83295500 | 0.33961000  | C | 3.61750000  | -0.41258800 | 2.55857500  |
| H | -4.79654200 | 4.28724700  | -0.06519800 | C | 5.67980600  | 4.14721600  | 2.38074500  |
| H | -6.90582300 | 0.88761600  | -1.57550900 | C | 2.66002000  | 2.84886100  | -1.37405600 |
| H | -3.15165800 | -0.11370300 | 3.69254000  | C | 0.91082100  | 0.09584800  | -1.55527500 |
| H | -1.75893500 | 0.44514800  | 2.77271400  | C | -0.46124700 | -0.63523800 | -1.37241400 |
| H | -3.40767700 | 0.75384600  | 2.17883400  | B | -1.68438100 | -0.10472100 | -0.45959000 |
| H | -2.40847100 | -2.27235100 | -2.16275300 | O | 0.44069800  | -0.58737300 | 2.48126900  |
| H | -0.95751300 | -3.10106400 | -1.58218900 | C | -2.02586900 | 1.45599400  | -0.59578100 |
| H | -2.47471900 | -3.98419100 | -1.76098800 | C | -1.17693600 | 2.46980000  | -0.15044700 |
| H | -2.71503200 | -4.89675200 | 3.96853600  | C | -1.43391000 | 3.82704400  | -0.32036000 |
| H | -4.28691900 | -5.06422200 | 3.18448700  | C | -2.60609100 | 4.22063100  | -0.95769200 |
| H | -2.87229100 | -5.87548800 | 2.49851200  | C | -3.49359000 | 3.24922300  | -1.41482000 |
| H | -2.67229100 | 4.26798700  | 0.51426700  | C | -3.19418800 | 1.90211600  | -1.22723000 |
| H | -2.14257000 | 2.81889700  | 1.36092000  | F | -0.01917600 | 2.15874700  | 0.48200500  |
| H | -1.56292700 | 3.14970400  | -0.27228400 | F | -4.08685600 | 1.01638000  | -1.69828000 |
| H | -7.02566300 | 4.58933300  | -0.99015300 | F | -4.62056600 | 3.61918400  | -2.03527700 |
| H | -7.81260500 | 3.26497100  | -1.86960200 | F | -2.87251300 | 5.51693700  | -1.14019600 |
| H | -7.92744000 | 3.34944400  | -0.11051800 | F | -0.55244200 | 4.74502100  | 0.10196500  |
| H | -4.87860200 | -1.59579300 | -0.60815800 | C | -2.81445100 | -1.11040900 | 0.02978200  |
| H | -5.97482900 | -1.09764800 | -1.90149200 | C | -3.83786500 | -0.67876300 | 0.89101000  |
| H | -4.24677600 | -1.20702300 | -2.20848400 | C | -4.82889300 | -1.51717100 | 1.39289300  |
| H | -0.23044300 | 2.03066700  | -1.28643200 | C | -4.83063600 | -2.86206800 | 1.04142500  |
| H | -1.39540400 | 0.88315700  | 0.59162800  | C | -3.84035100 | -3.34471700 | 0.19154800  |
| H | 0.50733900  | -0.00843100 | 0.43120000  | C | -2.86575900 | -2.47581100 | -0.28691300 |
| N | 0.84997800  | 1.24106400  | -2.92847500 | F | -3.91166000 | 0.60572800  | 1.26861100  |
| H | 0.50741200  | 2.06864500  | -3.41097600 | F | -5.77910100 | -1.03997200 | 2.20451000  |
| H | 1.84711800  | 1.37575100  | -2.80060100 | F | -5.77431700 | -3.68351500 | 1.50969100  |
| C | -1.83880400 | 0.42639000  | -3.13481100 | F | -3.83297300 | -4.63892800 | -0.16091800 |
| H | -2.62364500 | -0.30738300 | -3.34744000 | F | -1.94651500 | -3.04257600 | -1.10727300 |
| H | -2.30860600 | 1.41471000  | -3.07816500 | C | 3.04770300  | -1.74307600 | -0.44713500 |
| H | -1.13456000 | 0.42344200  | -3.96998600 | C | 4.29810000  | -1.65498500 | -1.12030100 |

### TSM34

E= -2549.095113 au

|   |            |            |             |   |            |             |             |
|---|------------|------------|-------------|---|------------|-------------|-------------|
| C | 3.32058900 | 2.40240600 | -0.08792700 | C | 4.51897700 | -4.09379800 | -1.05383000 |
| C | 3.13157300 | 1.14418400 | 0.53585900  | C | 3.30318700 | -4.15718500 | -0.37658800 |
| C | 3.77748600 | 0.87613300 | 1.77835400  | C | 2.55035600 | -3.01795400 | -0.06019200 |
| C | 4.60550600 | 1.85649500 | 2.33416400  | C | 4.97121300 | -0.35691000 | -1.51741900 |
| C | 4.80944400 | 3.09821500 | 1.73288200  | C | 5.28912200 | -5.34355500 | -1.40494400 |
| C | 4.15742200 | 3.34233700 | 0.52537400  | C | 1.24972500 | -3.25702700 | 0.68211700  |
|   |            |            |             | H | 0.73667600 | 1.17150200  | -1.56280800 |
|   |            |            |             | H | 5.09919900 | 1.63622900  | 3.27769700  |

|   |             |             |             |   |             |             |             |
|---|-------------|-------------|-------------|---|-------------|-------------|-------------|
| H | 4.29685200  | 4.30310600  | 0.03520400  | C | 3.50616500  | -0.22503200 | 2.49356700  |
| H | 2.91752900  | -5.12740300 | -0.07245300 | C | 4.72890600  | 4.62961100  | 2.39150700  |
| H | 5.95216300  | -2.75101300 | -1.92273700 | C | 2.21953400  | 2.80866700  | -1.51932900 |
| H | 4.23979100  | -0.37940000 | 3.45731100  | C | 0.90993100  | -0.13260900 | -1.70617400 |
| H | 2.58058000  | -0.55959200 | 2.88008100  | C | -0.39565300 | -0.88073300 | -1.44673000 |
| H | 3.92224400  | -1.29307300 | 1.98344700  | B | -1.81669000 | -0.29524300 | -1.04849100 |
| H | 2.66810400  | 2.08539900  | -2.15453500 | O | -0.10753000 | -1.21384400 | 2.50017400  |
| H | 1.62094000  | 3.14435900  | -1.19181600 | C | -2.07745700 | 1.28968300  | -1.00728200 |
| H | 3.17680400  | 3.72531300  | -1.77500300 | C | -1.42095000 | 2.16833500  | -0.14688200 |
| H | 6.51793200  | 3.69481300  | 2.92141400  | C | -1.69688600 | 3.53188100  | -0.08583400 |
| H | 6.08575300  | 4.84541700  | 1.64160200  | C | -2.67607400 | 4.06515000  | -0.92127500 |
| H | 5.10525100  | 4.73679600  | 3.10726400  | C | -3.35994300 | 3.22981100  | -1.80084900 |
| H | 1.28856000  | -4.23117100 | 1.17886700  | C | -3.04893600 | 1.87223000  | -1.82402100 |
| H | 1.03080300  | -2.50943700 | 1.44776600  | F | -0.45589400 | 1.70651200  | 0.67970900  |
| H | 0.38999800  | -3.29266600 | 0.00163000  | F | -3.73328000 | 1.10048200  | -2.69752700 |
| H | 5.11940100  | -5.62805500 | -2.45183100 | F | -4.29772100 | 3.73540600  | -2.61181400 |
| H | 6.36772100  | -5.19744700 | -1.28092400 | F | -2.95238200 | 5.37175400  | -0.88288100 |
| H | 4.98492800  | -6.18999700 | -0.78151900 | F | -1.02948000 | 4.33127100  | 0.75483900  |
| H | 5.44830200  | 0.12616600  | -0.65742400 | C | -2.84049200 | -1.23950300 | -0.24425300 |
| H | 5.74937600  | -0.55432300 | -2.26080900 | C | -3.26450300 | -0.89058900 | 1.04231800  |
| H | 4.28508700  | 0.37466700  | -1.94800100 | C | -4.12735300 | -1.66500700 | 1.81359200  |
| H | -0.25746400 | -1.68494800 | -1.17491800 | C | -4.60403200 | -2.86786100 | 1.30049200  |
| H | 1.17273400  | -0.48123800 | 1.14704900  | C | -4.20417900 | -3.27177800 | 0.03047800  |
| H | -1.04451100 | -0.05119400 | 1.22455300  | C | -3.34311000 | -2.45994000 | -0.70172100 |
| N | -1.29849300 | -0.60691900 | -2.59268500 | F | -2.82335700 | 0.25311800  | 1.60660900  |
| H | -1.28328900 | 0.28876200  | -3.06928600 | F | -4.49856000 | -1.26548100 | 3.03185600  |
| H | -1.11646700 | -1.35929400 | -3.24928100 | F | -5.43427300 | -3.62901000 | 2.01856000  |
| C | 1.57429900  | -0.32131400 | -2.88112300 | F | -4.64901300 | -4.42841600 | -0.47805500 |
| H | 2.52073100  | 0.19298300  | -3.06300400 | F | -2.99257700 | -2.93975500 | -1.93111200 |
| H | 1.77266800  | -1.39746900 | -2.90605100 | C | 3.25145300  | -1.60025300 | -0.52894800 |
| H | 0.91200400  | -0.08294300 | -3.71834000 | C | 4.48604600  | -1.29453500 | -1.16065400 |
|   |             |             |             | C | 5.39487400  | -2.32658800 | -1.43016500 |
|   |             |             |             | C | 5.14330100  | -3.65595700 | -1.09413700 |
|   |             |             |             | C | 3.93136100  | -3.94253100 | -0.46483000 |
|   |             |             |             | C | 2.98849800  | -2.95191600 | -0.16761400 |
|   |             |             |             | C | 4.92162800  | 0.10068700  | -1.55253400 |
|   |             |             |             | C | 6.15494200  | -4.74182100 | -1.37317900 |
|   |             |             |             | C | 1.72626500  | -3.40402600 | 0.54172300  |
|   |             |             |             | H | 0.67416900  | 0.92828300  | -1.78606100 |
|   |             |             |             | H | 4.55878400  | 2.05232400  | 3.27729500  |
|   |             |             |             | H | 3.46088200  | 4.53283400  | -0.02220500 |
|   |             |             |             | H | 3.70962000  | -4.97081400 | -0.18699400 |
|   |             |             |             | H | 6.33257800  | -2.07540600 | -1.92195600 |

## M4

E= -2549.147538 au

|   |             |             |             |   |            |             |             |
|---|-------------|-------------|-------------|---|------------|-------------|-------------|
| C | 2.83308600  | 2.48930100  | -0.17131600 | C | 2.98849800 | -2.95191600 | -0.16761400 |
| C | 2.82116400  | 1.21482900  | 0.45057600  | C | 4.92162800 | 0.10068700  | -1.55253400 |
| C | 3.45329600  | 1.07970600  | 1.72308000  | C | 6.15494200 | -4.74182100 | -1.37317900 |
| C | 4.07510500  | 2.18461500  | 2.31170900  | C | 1.72626500 | -3.40402600 | 0.54172300  |
| C | 4.08521700  | 3.44437800  | 1.71280000  | H | 0.67416900 | 0.92828300  | -1.78606100 |
| C | 3.46056500  | 3.56442400  | 0.47382700  | H | 4.55878400 | 2.05232400  | 3.27729500  |
| P | 1.92727000  | -0.34583400 | -0.07843900 | H | 3.46088200 | 4.53283400  | -0.02220500 |
| C | -0.51223900 | -0.25199800 | 3.35614900  | H | 3.70962000 | -4.97081400 | -0.18699400 |
| O | -1.05099800 | -0.50099400 | 4.40191700  | H | 6.33257800 | -2.07540600 | -1.92195600 |



|   |             |             |             |   |             |             |             |
|---|-------------|-------------|-------------|---|-------------|-------------|-------------|
| H | 3.96703500  | -0.06531500 | 3.47276300  | B | -1.76484400 | 0.20170400  | -0.67907900 |
| H | 2.50920200  | -0.64649000 | 2.66432300  | C | -1.92462600 | 1.75592400  | -0.31417600 |
| H | 4.09107000  | -0.99152400 | 1.97335900  | C | -1.32028300 | 2.36152600  | 0.79017400  |
| H | 2.46341200  | 2.07000700  | -2.28783400 | C | -1.53121900 | 3.69767500  | 1.12963000  |
| H | 1.12707600  | 2.88724800  | -1.46352000 | C | -2.37479300 | 4.47995000  | 0.34513600  |
| H | 2.58573200  | 3.77617000  | -1.87557600 | C | -2.99788700 | 3.91980400  | -0.76760100 |
| H | 4.08758100  | 5.02368800  | 3.19090100  | C | -2.76328200 | 2.58123400  | -1.06734200 |
| H | 5.68584400  | 4.35787500  | 2.85147600  | F | -0.49026300 | 1.65835000  | 1.57553700  |
| H | 4.91126500  | 5.44594300  | 1.68507900  | F | -3.38508700 | 2.07710300  | -2.15961700 |
| H | 1.80666200  | -4.46185800 | 0.81013500  | F | -3.80620800 | 4.66689100  | -1.53103500 |
| H | 1.53129200  | -2.84262900 | 1.45952300  | F | -2.58275400 | 5.76292200  | 0.65521300  |
| H | 0.83195600  | -3.30363300 | -0.08391100 | F | -0.92865200 | 4.23575300  | 2.19652700  |
| H | 5.66753000  | -5.68192900 | -1.65387000 | C | -2.91716700 | -0.78541100 | -0.14502100 |
| H | 6.83677300  | -4.45684500 | -2.18113300 | C | -3.06145300 | -1.00823900 | 1.22696800  |
| H | 6.76769900  | -4.94810800 | -0.48547800 | C | -4.04392600 | -1.82739500 | 1.77561900  |
| H | 5.26926500  | 0.67133300  | -0.68460200 | C | -4.94297100 | -2.47195900 | 0.92881000  |
| H | 5.74755000  | 0.04933700  | -2.26901600 | C | -4.83977900 | -2.28725500 | -0.44632600 |
| H | 4.12025000  | 0.68378000  | -2.00851700 | C | -3.84229200 | -1.45369100 | -0.94790000 |
| H | -0.24775100 | -1.93813500 | -1.23340400 | F | -2.20863500 | -0.41329800 | 2.08386900  |
| H | 0.34950000  | -0.82326800 | 1.71600100  | F | -4.13017800 | -2.00431500 | 3.09913200  |
| H | -0.29995300 | 0.77106800  | 3.00118800  | F | -5.89321500 | -3.26490900 | 1.43260200  |
| N | -1.44919000 | -0.77899800 | -2.53794500 | F | -5.69424900 | -2.90484900 | -1.27194400 |
| H | -1.30446800 | -0.07195300 | -3.25188100 | F | -3.80163300 | -1.32592100 | -2.30156000 |
| H | -1.82620100 | -1.64681500 | -2.90481600 | C | 2.37349800  | -1.95383700 | -0.06685500 |
| C | 1.59321900  | -0.60725500 | -2.99861400 | C | 3.32171400  | -2.45784800 | -0.99679400 |
| H | 2.49166200  | -0.02897400 | -3.22866100 | C | 3.42980700  | -3.84331400 | -1.17226800 |
| H | 1.88753200  | -1.65908500 | -2.93177300 | C | 2.64636600  | -4.75709600 | -0.46483800 |
| H | 0.91573200  | -0.50487700 | -3.85740500 | C | 1.73613100  | -4.24831900 | 0.46093600  |
|   |             |             |             | C | 1.59505900  | -2.87296400 | 0.68715400  |
|   |             |             |             | C | 4.26793600  | -1.58888300 | -1.79609800 |
|   |             |             |             | C | 2.80683200  | -6.24504400 | -0.67137600 |
|   |             |             |             | C | 0.63186500  | -2.44639100 | 1.78083700  |
|   |             |             |             | H | 0.80418800  | 1.35746200  | -1.22679700 |
|   |             |             |             | H | 6.51972900  | 0.62430900  | 2.09704800  |
|   |             |             |             | H | 5.49709500  | 3.35294600  | -1.02758800 |
|   |             |             |             | H | 1.12344000  | -4.93845000 | 1.03761500  |
|   |             |             |             | H | 4.15462700  | -4.21806400 | -1.89273100 |
|   |             |             |             | H | 5.03280100  | -0.77297700 | 3.00613000  |
|   |             |             |             | H | 3.30388800  | -0.68125600 | 2.64393500  |
|   |             |             |             | H | 4.33695500  | -1.77005000 | 1.72139800  |
|   |             |             |             | H | 2.72977700  | 1.82478400  | -2.33831200 |
|   |             |             |             | H | 2.20415500  | 2.98664500  | -1.10522000 |
|   |             |             |             | H | 3.60629200  | 3.34410400  | -2.10515600 |

## N

E= -2395.284211 au

|   |             |             |             |   |            |             |             |
|---|-------------|-------------|-------------|---|------------|-------------|-------------|
| C | 3.99995700  | 1.89117900  | -0.56937900 | C | 0.63186500 | -2.44639100 | 1.78083700  |
| C | 3.66272900  | 0.76002200  | 0.21825500  | H | 0.80418800 | 1.35746200  | -1.22679700 |
| C | 4.58782400  | 0.33938300  | 1.21765500  | H | 6.51972900 | 0.62430900  | 2.09704800  |
| C | 5.82570800  | 0.97859100  | 1.33708300  | H | 5.49709500 | 3.35294600  | -1.02758800 |
| C | 6.19051900  | 2.05556500  | 0.53004100  | H | 1.12344000 | -4.93845000 | 1.03761500  |
| C | 5.25299400  | 2.49688600  | -0.40143200 | H | 4.15462700 | -4.21806400 | -1.89273100 |
| P | 2.01865500  | -0.14223900 | 0.28825200  | H | 5.03280100 | -0.77297700 | 3.00613000  |
| C | 4.29936400  | -0.78274500 | 2.19391200  | H | 3.30388800 | -0.68125600 | 2.64393500  |
| C | 7.52426200  | 2.74503500  | 0.69489900  | H | 4.33695500 | -1.77005000 | 1.72139800  |
| C | 3.08205700  | 2.53553100  | -1.58676200 | H | 2.72977700 | 1.82478400  | -2.33831200 |
| C | 0.96931600  | 0.27301700  | -1.25633500 | H | 2.20415500 | 2.98664500  | -1.10522000 |
| C | -0.37291300 | -0.42185100 | -1.12230600 | H | 3.60629200 | 3.34410400  | -2.10515600 |

|   |             |             |             |   |             |             |             |
|---|-------------|-------------|-------------|---|-------------|-------------|-------------|
| H | 7.49838000  | 3.47338300  | 1.51678100  | C | -3.45811000 | -2.74103300 | 0.74544700  |
| H | 8.32058100  | 2.02826800  | 0.92509600  | H | -3.76974200 | -3.39241400 | 1.55984500  |
| H | 7.80923000  | 3.28799800  | -0.21251100 | C | -3.81254800 | -3.07452400 | -0.55814500 |
| H | 0.09014100  | -3.31710700 | 2.16482500  | C | -3.39164100 | -2.21544600 | -1.57786400 |
| H | 1.16796400  | -1.99280800 | 2.62334000  | H | -3.64487200 | -2.45097300 | -2.60973400 |
| H | -0.10421100 | -1.70594400 | 1.46051100  | C | -2.64231100 | -1.06639300 | -1.32099400 |
| H | 1.91867000  | -6.79401800 | -0.34134800 | C | -2.39899700 | -1.39712400 | 2.53148700  |
| H | 2.98491700  | -6.48723000 | -1.72519500 | H | -3.21418100 | -1.79350600 | 3.14706900  |
| H | 3.66193100  | -6.63439800 | -0.10259600 | H | -2.23919300 | -0.35643500 | 2.81094700  |
| H | 5.06308200  | -1.17926900 | -1.16322600 | H | -1.49706900 | -1.95580000 | 2.81334100  |
| H | 4.74496900  | -2.18125900 | -2.58414300 | C | -4.60971500 | -4.31899400 | -0.86908100 |
| H | 3.75164500  | -0.74995800 | -2.26184300 | H | -4.91112300 | -4.83963800 | 0.04525800  |
| H | -0.28129300 | -1.50690700 | -1.10830400 | H | -4.02742900 | -5.02296200 | -1.47722600 |
| N | -1.36529600 | -0.03482800 | -2.21637200 | H | -5.51803900 | -4.08115000 | -1.43638900 |
| H | -1.82950000 | -0.76455600 | -2.74858500 | C | -2.20191100 | -0.24174200 | -2.51444800 |
| H | -1.17085600 | 0.79496500  | -2.76956500 | H | -2.54988500 | -0.70506000 | -3.44281100 |
| O | 1.61093100  | -0.09296200 | -2.48421100 | H | -1.10917200 | -0.16660200 | -2.56778600 |
| H | 0.93521100  | -0.17208400 | -3.17796700 | H | -2.59679100 | 0.78001400  | -2.48646200 |

## N1

E= -2396.447552 au

|   |             |             |             |   |             |             |             |
|---|-------------|-------------|-------------|---|-------------|-------------|-------------|
| C | -2.32628500 | 2.28512600  | -0.21181500 | C | 2.82059400  | 0.55580800  | 0.48497900  |
| C | -3.62874100 | 2.47495300  | 0.32007800  | C | 3.00073000  | 1.94498300  | 0.43666500  |
| C | -4.32714200 | 3.65099700  | 0.01540700  | F | 2.01498200  | 2.77835400  | 0.84425200  |
| H | -5.32208000 | 3.78675200  | 0.43509000  | C | 4.15066700  | 2.56744500  | -0.03346200 |
| C | -3.79569800 | 4.64874000  | -0.80255100 | F | 4.24192200  | 3.90141200  | -0.06901100 |
| C | -2.51590500 | 4.44712100  | -1.32181300 | C | 5.21770200  | 1.78384500  | -0.46490800 |
| H | -2.07666500 | 5.21050700  | -1.96085000 | F | 6.33435900  | 2.35784700  | -0.91082700 |
| C | -1.77396300 | 3.29211600  | -1.04988000 | C | 5.10824000  | 0.39725600  | -0.42317600 |
| C | -4.33103700 | 1.46405600  | 1.20126400  | F | 6.13177200  | -0.36304100 | -0.82460500 |
| H | -3.69783000 | 1.11652300  | 2.02095400  | C | 3.93010600  | -0.18463800 | 0.03727000  |
| H | -4.63102300 | 0.57553300  | 0.63635300  | C | 1.15137200  | -1.57749000 | 0.42509300  |
| H | -5.23385700 | 1.90397800  | 1.63665100  | C | 0.84617600  | -2.69635500 | 1.20871400  |
| C | -4.58762200 | 5.89084100  | -1.13620100 | F | 0.90532500  | -2.62550200 | 2.55408100  |
| H | -5.31120700 | 6.12857500  | -0.34928600 | C | 0.49047600  | -3.93142000 | 0.67244700  |
| H | -5.15228800 | 5.76090700  | -2.06923600 | F | 0.21283100  | -4.96745100 | 1.47225100  |
| H | -3.93392200 | 6.75919400  | -1.27207900 | C | 0.42708900  | -4.08277900 | -0.70893700 |
| C | -0.39348300 | 3.18585700  | -1.66885300 | F | 0.07755400  | -5.25455000 | -1.24273900 |
| H | -0.23852500 | 3.99734900  | -2.38713600 | C | 0.72952800  | -3.00063300 | -1.53302100 |
| H | -0.24915200 | 2.23455100  | -2.19031000 | F | 0.66050500  | -3.13545700 | -2.86387100 |
| H | 0.40111000  | 3.25597900  | -0.91844300 | C | 1.10047100  | -1.79234300 | -0.95911100 |
| C | -2.30901200 | -0.72220900 | 0.02485700  | F | 1.37172100  | -0.77790900 | -1.80415500 |
| C | -2.71633000 | -1.59169300 | 1.06491300  | F | 3.91515600  | -1.52679800 | 0.06103500  |
|   |             |             |             | C | 0.65602100  | 0.40623300  | 2.26539300  |
|   |             |             |             | H | 0.20269700  | -0.46480400 | 2.74417300  |
|   |             |             |             | C | -0.51505100 | 1.31629000  | 1.81899700  |

|   |             |             |             |
|---|-------------|-------------|-------------|
| H | -0.06864300 | 2.26575400  | 1.49468000  |
| B | 1.51615600  | -0.15950800 | 1.02929200  |
| P | -1.22824200 | 0.80234400  | 0.13460100  |
| H | 2.33016000  | -1.16671800 | -4.98421100 |
| H | 2.00424500  | -1.36589100 | -4.34748600 |
| N | 1.51502500  | 1.01773700  | 3.29555500  |
| H | 1.88040300  | 1.90531600  | 2.95520200  |
| H | 0.93398900  | 1.24657900  | 4.10173300  |
| O | -1.34581700 | 1.57479300  | 2.94950100  |
| H | -1.91284100 | 2.33104300  | 2.72755300  |

## TSN12

E= -2396.447552 au

|   |            |             |             |
|---|------------|-------------|-------------|
| C | 2.93861900 | -2.00871100 | -0.16705100 |
| C | 4.14693400 | -2.03740400 | 0.57397500  |
| C | 5.04671400 | -3.09253500 | 0.36680600  |
| H | 5.97207700 | -3.10409900 | 0.93896300  |
| C | 4.79839200 | -4.12258400 | -0.53991800 |
| C | 3.60253400 | -4.07913900 | -1.26167700 |
| H | 3.38689000 | -4.86864700 | -1.97876100 |
| C | 2.67159000 | -3.04922500 | -1.09965600 |
| C | 4.53757200 | -0.97529700 | 1.57889700  |
| H | 3.72472300 | -0.74145700 | 2.27108700  |
| H | 4.81468200 | -0.03623800 | 1.08854200  |
| H | 5.39580200 | -1.31054100 | 2.16947900  |
| C | 5.77600700 | -5.25841000 | -0.72689400 |
| H | 6.74734700 | -5.02941600 | -0.27754800 |
| H | 5.93627700 | -5.47676600 | -1.78895400 |
| H | 5.40529500 | -6.18113500 | -0.26152200 |
| C | 1.41085000 | -3.10007500 | -1.94126000 |
| H | 1.26704900 | -2.18001300 | -2.51781300 |
| H | 0.50485900 | -3.24182800 | -1.33868000 |
| H | 1.46100800 | -3.93567500 | -2.64610800 |
| C | 2.41664300 | 0.97411500  | 0.19113000  |
| C | 2.46511100 | 1.79753200  | 1.34005600  |
| C | 3.06749100 | 3.06189200  | 1.24331200  |
| H | 3.10420000 | 3.68175000  | 2.13685100  |
| C | 3.61625500 | 3.54944700  | 0.06057400  |
| C | 3.53712100 | 2.73344800  | -1.07255800 |
| H | 3.94087200 | 3.09321000  | -2.01674100 |
| C | 2.93986800 | 1.47302600  | -1.03950600 |
| C | 1.88336700 | 1.43642800  | 2.68839200  |
| H | 2.47015000 | 1.90151200  | 3.48807900  |

|   |             |             |             |
|---|-------------|-------------|-------------|
| H | 1.84186200  | 0.36329500  | 2.87658600  |
| H | 0.86124800  | 1.82588400  | 2.78428500  |
| C | 4.27035100  | 4.90874900  | -0.00618000 |
| H | 4.17170200  | 5.44750200  | 0.94127000  |
| H | 3.82319900  | 5.52772500  | -0.79341600 |
| H | 5.34077700  | 4.82451400  | -0.23349400 |
| C | 2.85549100  | 0.69992600  | -2.34073500 |
| H | 3.31353500  | 1.27380900  | -3.15195400 |
| H | 1.81249100  | 0.50331900  | -2.61796100 |
| H | 3.36799200  | -0.26760700 | -2.29069300 |
| C | -3.05787600 | -0.86599700 | 0.14256300  |
| C | -3.25151700 | -2.23533600 | -0.05705600 |
| F | -2.17363400 | -3.06446100 | -0.05888500 |
| C | -4.49263800 | -2.82396000 | -0.26422400 |
| F | -4.60759900 | -4.14406900 | -0.45915700 |
| C | -5.62763500 | -2.01608600 | -0.26483600 |
| F | -6.83474000 | -2.55484300 | -0.45838800 |
| C | -5.49390900 | -0.64665100 | -0.05898500 |
| F | -6.58131200 | 0.13374400  | -0.05102200 |
| C | -4.22646700 | -0.09842800 | 0.13647400  |
| C | -1.33716200 | 1.26933500  | -0.09171400 |
| C | -1.41615600 | 2.33299100  | 0.81285100  |
| F | -1.72494200 | 2.09748400  | 2.10564100  |
| C | -1.19314200 | 3.66138700  | 0.46431200  |
| F | -1.27930500 | 4.63253800  | 1.38222400  |
| C | -0.88135300 | 3.97815900  | -0.85464100 |
| F | -0.65983300 | 5.24753200  | -1.20980900 |
| C | -0.80189900 | 2.95969200  | -1.79758400 |
| F | -0.49941000 | 3.24627900  | -3.07093400 |
| C | -1.04280800 | 1.64478500  | -1.40626300 |
| F | -0.94614800 | 0.71276400  | -2.38225500 |
| F | -4.17774600 | 1.22987600  | 0.33988100  |
| C | -0.76231300 | -0.75405300 | 1.71153700  |
| H | -0.54147700 | 0.14955400  | 2.28359700  |
| C | 0.60171800  | -1.44146200 | 1.43157100  |
| H | 0.36840300  | -2.40832400 | 0.94997100  |
| B | -1.58924500 | -0.25289600 | 0.38457300  |
| P | 1.62014100  | -0.69790100 | 0.00835000  |
| H | -0.25958500 | -0.88024300 | -0.73301100 |
| H | -1.06271400 | -1.03001500 | -0.77830200 |
| N | -1.59659000 | -1.58119700 | 2.59953300  |
| H | -1.81453100 | -2.46492600 | 2.14224200  |
| H | -1.04993100 | -1.81905600 | 3.42608200  |

---

|   |            |             |            |
|---|------------|-------------|------------|
| O | 1.23879500 | -1.69961600 | 2.67848100 |
| H | 1.98118500 | -2.30273600 | 2.50932800 |

## N2

E= -2396.470743 au

|   |             |             |             |
|---|-------------|-------------|-------------|
| C | -3.73031400 | -2.17526000 | -0.15278000 |
| C | -3.40841300 | -0.98681700 | 0.54996700  |
| C | -4.10705300 | -0.65657300 | 1.74608300  |
| C | -5.12947000 | -1.49858600 | 2.18511400  |
| C | -5.48367000 | -2.66154100 | 1.49652700  |
| C | -4.77010000 | -2.97428400 | 0.34094400  |
| P | -2.08325700 | 0.18675400  | 0.04075500  |
| C | -3.78670300 | 0.55617900  | 2.59327200  |
| C | -6.57930300 | -3.56389500 | 2.00892700  |
| C | -3.00321500 | -2.68589700 | -1.37657400 |
| C | -0.89284800 | -0.34820400 | -1.30465500 |
| C | 0.44007800  | 0.47473800  | -1.21709600 |
| B | 1.41983500  | -0.02443000 | 0.01109200  |
| C | 1.95275300  | -1.55601800 | -0.27725400 |
| C | 1.26506800  | -2.67804600 | 0.18985400  |
| C | 1.68731700  | -3.99109200 | -0.00146100 |
| C | 2.86587900  | -4.23042600 | -0.70183100 |
| C | 3.58433300  | -3.15222100 | -1.20884400 |
| C | 3.11256200  | -1.85777500 | -0.99444100 |
| F | 0.08439400  | -2.53085200 | 0.85231100  |
| F | 3.84240800  | -0.85852900 | -1.54756000 |
| F | 4.71006600  | -3.36989500 | -1.90598300 |
| F | 3.29115300  | -5.48518900 | -0.90320400 |
| F | 0.96872700  | -5.02354800 | 0.47078000  |
| C | 2.65655600  | 0.99441700  | 0.37856200  |
| C | 3.44953700  | 0.69657600  | 1.49466100  |
| C | 4.50107400  | 1.48976300  | 1.94453500  |
| C | 4.80802500  | 2.66525600  | 1.26460000  |
| C | 4.05180300  | 3.01625900  | 0.15364700  |
| C | 3.00928300  | 2.18480100  | -0.25690900 |
| F | 3.20158700  | -0.42290300 | 2.20753100  |
| F | 5.21688700  | 1.13943300  | 3.02515700  |
| F | 5.81358100  | 3.44920700  | 1.67972200  |
| F | 4.32623300  | 4.15082600  | -0.51237700 |
| F | 2.32613300  | 2.63039400  | -1.35103100 |
| C | -2.69085300 | 1.88327900  | -0.28927000 |
| C | -3.73876100 | 2.09548000  | -1.21961400 |
| C | -4.14353000 | 3.40940900  | -1.47609600 |

|   |             |             |             |
|---|-------------|-------------|-------------|
| C | -3.55109900 | 4.50941400  | -0.85453500 |
| C | -2.52032900 | 4.27130000  | 0.05887200  |
| C | -2.07158300 | 2.98384700  | 0.36513100  |
| C | -4.44024500 | 0.97390600  | -1.95163900 |
| C | -4.01423600 | 5.91658600  | -1.14350300 |
| C | -0.96493200 | 2.85290000  | 1.39288100  |
| H | -0.69061800 | -1.40450400 | -1.09793300 |
| H | -5.66158700 | -1.23634500 | 3.09656200  |
| H | -5.02034300 | -3.88132800 | -0.20377900 |
| H | -2.04348700 | 5.11568900  | 0.55086600  |
| H | -4.94406800 | 3.57329400  | -2.19327200 |
| H | -4.45092700 | 0.59551800  | 3.46062300  |
| H | -2.75945900 | 0.52217500  | 2.97861300  |
| H | -3.90314500 | 1.49594500  | 2.04419300  |
| H | -2.76323900 | -1.91045600 | -2.10694600 |
| H | -2.06190200 | -3.16666000 | -1.08038900 |
| H | -3.60829300 | -3.44728000 | -1.87678600 |
| H | -6.19929100 | -4.23212500 | 2.79277900  |
| H | -7.40170800 | -2.98722800 | 2.44565000  |
| H | -6.98681700 | -4.19254600 | 1.21127500  |
| H | -0.61257000 | 3.84507300  | 1.68692300  |
| H | -1.31307900 | 2.35302000  | 2.30563700  |
| H | -0.09730500 | 2.29507900  | 1.02874400  |
| H | -3.16449300 | 6.58901700  | -1.30600900 |
| H | -4.65374300 | 5.95463300  | -2.03040100 |
| H | -4.58939800 | 6.32168500  | -0.30082200 |
| H | -4.99899700 | 0.32649500  | -1.26668700 |
| H | -5.15220000 | 1.38306600  | -2.67409300 |
| H | -3.72123200 | 0.35666200  | -2.49840700 |
| H | 0.15731700  | 1.52646200  | -1.08689200 |
| H | -1.26687800 | 0.28713600  | 1.17872400  |
| H | 0.74468500  | -0.07728500 | 1.02794100  |
| N | 0.96803400  | 0.40526500  | -2.61142700 |
| H | 1.61844800  | -0.37530700 | -2.69462300 |
| H | 1.51236000  | 1.24471100  | -2.78862200 |
| O | -1.50722800 | -0.17035700 | -2.55591400 |
| H | -0.71295600 | 0.11690000  | -3.10292200 |

## N3

E= -2585.055757 au

|   |             |             |             |
|---|-------------|-------------|-------------|
| C | -3.75202900 | -2.13193100 | -0.47922400 |
| C | -3.41754500 | -0.99181300 | 0.29397400  |
| C | -4.09111900 | -0.74435200 | 1.52473800  |

|   |             |             |             |                          |             |             |             |
|---|-------------|-------------|-------------|--------------------------|-------------|-------------|-------------|
| C | -5.10829000 | -1.61267400 | 1.92278700  | C                        | -0.99333500 | 2.81682000  | 1.31382200  |
| C | -5.48186700 | -2.72264100 | 1.16066400  | H                        | -0.71116800 | -1.28799200 | -1.39375900 |
| C | -4.78420800 | -2.96213600 | -0.02163200 | H                        | -5.61796000 | -1.41672000 | 2.86324300  |
| P | -2.10904200 | 0.22392600  | -0.15795200 | H                        | -5.04014900 | -3.83467400 | -0.61764300 |
| C | 0.48560300  | -1.62354200 | 3.27623000  | H                        | -2.12278100 | 5.11227400  | 0.63753800  |
| O | 1.33392600  | -2.42116600 | 3.33655200  | H                        | -5.05541900 | 3.69719700  | -2.14112100 |
| C | -3.73696700 | 0.39472800  | 2.45670500  | H                        | -4.41490400 | 0.40262700  | 3.31444700  |
| C | -6.60812300 | -3.62414500 | 1.60341500  | H                        | -2.71937100 | 0.28413600  | 2.85134300  |
| C | -3.04208700 | -2.56675200 | -1.74211100 | H                        | -3.80791800 | 1.37402200  | 1.97303200  |
| C | -0.93433800 | -0.22501300 | -1.54808400 | H                        | -2.81630100 | -1.74953800 | -2.43006000 |
| C | 0.39412000  | 0.60614200  | -1.46544000 | H                        | -2.09348600 | -3.05923700 | -1.49123100 |
| B | 1.38954300  | 0.08161200  | -0.26253800 | H                        | -3.65170800 | -3.30134100 | -2.27578700 |
| O | -0.38153000 | -0.83441700 | 3.25424400  | H                        | -6.57529800 | -3.80283400 | 2.68372300  |
| C | 1.99381500  | -1.40647100 | -0.61816400 | H                        | -7.58309600 | -3.17140700 | 1.37992600  |
| C | 1.37609100  | -2.58036500 | -0.18375000 | H                        | -6.57023800 | -4.59256100 | 1.09540800  |
| C | 1.86371200  | -3.86105600 | -0.42855000 | H                        | -0.65939900 | 3.79315800  | 1.67496600  |
| C | 3.03974600  | -4.00900400 | -1.15820000 | H                        | -1.30536900 | 2.23793400  | 2.19184900  |
| C | 3.69180400  | -2.87547400 | -1.63421700 | H                        | -0.12112700 | 2.31162800  | 0.88876600  |
| C | 3.15676200  | -1.61688300 | -1.36270600 | H                        | -3.32254200 | 6.70234100  | -0.95048600 |
| F | 0.20202800  | -2.52005000 | 0.51026700  | H                        | -4.69011400 | 6.09518900  | -1.90341000 |
| F | 3.82403100  | -0.55846500 | -1.88200100 | H                        | -4.83413700 | 6.26677500  | -0.15005000 |
| F | 4.81476200  | -3.00694100 | -2.35628900 | H                        | -5.06739300 | 0.41417700  | -1.40804300 |
| F | 3.52759500  | -5.23004400 | -1.41462200 | H                        | -5.23303500 | 1.53855700  | -2.76096700 |
| F | 1.21233300  | -4.94696200 | 0.01756800  | H                        | -3.79951700 | 0.50700100  | -2.64643700 |
| C | 2.57092700  | 1.12679400  | 0.19510000  | H                        | 0.10644900  | 1.65320000  | -1.30454000 |
| C | 3.23612900  | 0.88074000  | 1.40253200  | H                        | -1.29048800 | 0.26900000  | 0.98092400  |
| C | 4.22993400  | 1.69827500  | 1.93288200  | H                        | 0.70266200  | -0.05367800 | 0.73273100  |
| C | 4.60688800  | 2.84591200  | 1.24079200  | N                        | 0.89066000  | 0.57112900  | -2.87256600 |
| C | 3.97685900  | 3.14592000  | 0.03909300  | H                        | 1.45610100  | 1.39962800  | -3.03326600 |
| C | 2.98861900  | 2.29105700  | -0.44922800 | H                        | 1.51810700  | -0.22339600 | -2.99383900 |
| F | 2.91490300  | -0.21302400 | 2.13280600  | O                        | -1.58179300 | -0.00014500 | -2.77575800 |
| F | 4.82173600  | 1.39866800  | 3.10009400  | H                        | -0.80303200 | 0.30917100  | -3.33243600 |
| F | 5.55898600  | 3.65292800  | 1.73002800  |                          |             |             |             |
| F | 4.32137900  | 4.25371700  | -0.63810100 |                          |             |             |             |
| F | 2.42611500  | 2.68219100  | -1.62688500 |                          |             |             |             |
| C | -2.74179800 | 1.92803600  | -0.38751300 |                          |             |             |             |
| C | -3.81162000 | 2.18110400  | -1.28238000 |                          |             |             |             |
| C | -4.23884000 | 3.50165100  | -1.45028600 |                          |             |             |             |
| C | -3.65028600 | 4.57045800  | -0.77197300 |                          |             |             |             |
| C | -2.59777900 | 4.29267100  | 0.10377100  |                          |             |             |             |
| C | -2.12472000 | 2.99522800  | 0.32097400  |                          |             |             |             |
| C | -4.51509500 | 1.09544800  | -2.06495500 |                          |             |             |             |
| C | -4.14824800 | 5.98296200  | -0.95923200 |                          |             |             |             |
|   |             |             |             | <b>TSN34</b>             |             |             |             |
|   |             |             |             | <b>E= -2585.01026 au</b> |             |             |             |
| C | 3.58516000  | 2.24933500  | -0.16051900 |                          |             |             |             |
| C | 3.35447100  | 1.02724500  | 0.51797200  |                          |             |             |             |
| C | 4.11712000  | 0.72143200  | 1.68269900  |                          |             |             |             |
| C | 5.10982400  | 1.60940400  | 2.10092000  |                          |             |             |             |
| C | 5.36958500  | 2.80734000  | 1.43143500  |                          |             |             |             |
| C | 4.59167300  | 3.10239900  | 0.31459000  |                          |             |             |             |
| P | 2.06183800  | -0.23669000 | 0.10171200  |                          |             |             |             |
| C | -0.77005600 | -0.16971200 | 2.36855500  |                          |             |             |             |

|   |             |             |             |                          |             |             |             |
|---|-------------|-------------|-------------|--------------------------|-------------|-------------|-------------|
| O | -1.74071900 | -0.19654300 | 3.08621900  | H                        | 5.29643600  | -3.14717500 | -2.38366700 |
| C | 3.89553400  | -0.52275100 | 2.51886800  | H                        | 4.60145600  | -0.54347000 | 3.35408900  |
| C | 6.43814200  | 3.75512200  | 1.92058900  | H                        | 2.88625200  | -0.54484800 | 2.94641800  |
| C | 2.79626600  | 2.74589200  | -1.35308800 | H                        | 4.03766000  | -1.44514100 | 1.94615100  |
| C | 0.90266400  | 0.24544200  | -1.31589300 | H                        | 2.61064800  | 1.97983400  | -2.10902000 |
| C | -0.41103200 | -0.60544200 | -1.23703900 | H                        | 1.82538100  | 3.14390600  | -1.03015500 |
| B | -1.63221500 | -0.04992000 | -0.33528300 | H                        | 3.33034600  | 3.57008900  | -1.83510200 |
| O | 0.48229200  | -0.24506400 | 2.58622600  | H                        | 6.14542900  | 4.22362800  | 2.86900500  |
| C | -1.95226300 | 1.51640300  | -0.50966400 | H                        | 7.38479100  | 3.23187300  | 2.09947200  |
| C | -1.22820700 | 2.55265600  | 0.08301300  | H                        | 6.62473200  | 4.55633400  | 1.19876900  |
| C | -1.52377500 | 3.90110400  | -0.10150400 | H                        | 1.17880300  | -4.13905500 | 1.57790200  |
| C | -2.58835600 | 4.25996600  | -0.92304300 | H                        | 1.31502600  | -2.42594800 | 1.97355800  |
| C | -3.33174000 | 3.26507900  | -1.55379900 | H                        | 0.24333100  | -2.95530900 | 0.67943800  |
| C | -3.00163700 | 1.93170100  | -1.33483500 | H                        | 4.00741700  | -6.07537500 | -2.42857400 |
| F | -0.16757400 | 2.27496600  | 0.87502500  | H                        | 5.61097100  | -5.54767800 | -1.90850600 |
| F | -3.73423300 | 1.00445600  | -1.99453100 | H                        | 4.53557700  | -6.38510600 | -0.77268000 |
| F | -4.34302600 | 3.59745600  | -2.36408300 | H                        | 5.09521900  | -0.05114900 | -1.21579500 |
| F | -2.88230900 | 5.54689900  | -1.12126600 | H                        | 5.28074100  | -0.95850200 | -2.72018600 |
| F | -0.78426500 | 4.84717600  | 0.48815800  | H                        | 3.80615300  | -0.02696300 | -2.43108500 |
| C | -2.83336800 | -1.00722300 | 0.07951000  | H                        | -0.13008400 | -1.62443600 | -0.97080500 |
| C | -3.89325000 | -0.53723000 | 0.87671500  | H                        | 1.15733900  | -0.29996600 | 1.46328600  |
| C | -4.93396900 | -1.34494700 | 1.32712700  | H                        | -0.99023300 | -0.07195800 | 1.19959700  |
| C | -4.95183000 | -2.69356900 | 0.98797200  | N                        | -0.92516500 | -0.70860300 | -2.63856100 |
| C | -3.92829800 | -3.21400500 | 0.20060000  | H                        | -1.59353900 | 0.02897900  | -2.85704700 |
| C | -2.90431400 | -2.37549100 | -0.22398300 | H                        | -1.40511300 | -1.59652100 | -2.75880100 |
| F | -3.95301000 | 0.75003700  | 1.24237800  | O                        | 1.53003000  | 0.05164500  | -2.55970900 |
| F | -5.91419700 | -0.83593800 | 2.07938700  | H                        | 0.80123300  | -0.31646600 | -3.12331900 |
| F | -5.94220600 | -3.48202400 | 1.40723000  |                          |             |             |             |
| F | -3.93741200 | -4.50911000 | -0.13966900 |                          |             |             |             |
| F | -1.95098600 | -2.96978700 | -0.98627300 |                          |             |             |             |
| C | 2.84909000  | -1.83801000 | -0.40760600 |                          |             |             |             |
| C | 3.92990300  | -1.88122300 | -1.32915400 |                          |             |             |             |
| C | 4.46821700  | -3.12429600 | -1.67901100 |                          |             |             |             |
| C | 3.98681500  | -4.32644600 | -1.15982000 |                          |             |             |             |
| C | 2.93599800  | -4.26180600 | -0.24504400 |                          |             |             |             |
| C | 2.35469400  | -3.05030600 | 0.14679500  |                          |             |             |             |
| C | 4.55979000  | -0.65666800 | -1.95428100 |                          |             |             |             |
| C | 4.57000500  | -5.65214100 | -1.58570500 |                          |             |             |             |
| C | 1.21893800  | -3.13397300 | 1.14790600  |                          |             |             |             |
| H | 0.66590400  | 1.30166400  | -1.16500200 |                          |             |             |             |
| H | 5.69052100  | 1.35733100  | 2.98564700  |                          |             |             |             |
| H | 4.76494600  | 4.03568800  | -0.21623000 |                          |             |             |             |
| H | 2.55172000  | -5.18326800 | 0.18654600  |                          |             |             |             |
|   |             |             |             | <b>N4</b>                |             |             |             |
|   |             |             |             | <b>E= -2585.04727 au</b> |             |             |             |
|   |             |             |             | C                        | -3.93343100 | -1.96310200 | -0.61087200 |
|   |             |             |             | C                        | -3.81674500 | -0.62163800 | -0.15069600 |
|   |             |             |             | C                        | -5.01102300 | 0.06673900  | 0.20689300  |
|   |             |             |             | C                        | -6.25063800 | -0.51468900 | -0.07899800 |
|   |             |             |             | C                        | -6.37759400 | -1.77485400 | -0.66563700 |
|   |             |             |             | C                        | -5.20342100 | -2.49154100 | -0.88260100 |
|   |             |             |             | P                        | -2.13287400 | 0.11780300  | 0.23415000  |
|   |             |             |             | C                        | -0.48324800 | -1.24058000 | 4.03624300  |
|   |             |             |             | O                        | -0.39227700 | -1.61954400 | 5.17432000  |
|   |             |             |             | C                        | -5.04013400 | 1.38292300  | 0.95947700  |
|   |             |             |             | C                        | -7.73082800 | -2.35106500 | -1.00478500 |
|   |             |             |             | C                        | -2.77002700 | -2.93341700 | -0.73783600 |
|   |             |             |             | C                        | -1.01015900 | -0.45707200 | -1.21785300 |

|   |             |             |             |   |             |             |             |
|---|-------------|-------------|-------------|---|-------------|-------------|-------------|
| C | 0.25364100  | 0.37771700  | -1.22880200 | H | -2.06861300 | -2.84313500 | 0.09886400  |
| B | 1.72044900  | -0.16244000 | -0.93714100 | H | -3.15019300 | -3.95872100 | -0.72716600 |
| O | -1.66038900 | -1.17284400 | 3.38380700  | H | -8.48452400 | -2.06761900 | -0.26195300 |
| C | 2.04212400  | -1.70261900 | -0.62538500 | H | -8.08399100 | -1.98660800 | -1.97889000 |
| C | 1.44329200  | -2.45849600 | 0.38057000  | H | -7.69958700 | -3.44426700 | -1.05711400 |
| C | 1.80069600  | -3.77372800 | 0.66917600  | H | -0.65681900 | 2.91356400  | 2.95390100  |
| C | 2.81215500  | -4.37934200 | -0.07212500 | H | -1.67657300 | 1.48113800  | 2.80389400  |
| C | 3.44585200  | -3.66493000 | -1.08712300 | H | -0.08810800 | 1.51578800  | 2.04228700  |
| C | 3.05225100  | -2.35375200 | -1.33890700 | H | -1.19207900 | 6.73621100  | 0.33503100  |
| F | 0.44210100  | -1.92663800 | 1.12063600  | H | -1.91065400 | 6.67418500  | -1.28585200 |
| F | 3.69213200  | -1.69412300 | -2.32726800 | H | -2.94728800 | 6.76301800  | 0.14004000  |
| F | 4.41659500  | -4.24305600 | -1.80469400 | H | -4.10774500 | 1.21093800  | -2.00255100 |
| F | 3.16989400  | -5.64022300 | 0.18398100  | H | -3.95508400 | 2.72013600  | -2.90891900 |
| F | 1.18105200  | -4.45591200 | 1.63844700  | H | -2.66481600 | 1.50761000  | -2.96629700 |
| C | 2.81917500  | 0.89375500  | -0.44204800 | H | 0.07982300  | 1.44908000  | -1.16566000 |
| C | 2.97435700  | 1.12073700  | 0.92628600  | H | -1.53520400 | -0.83988300 | 2.46711200  |
| C | 3.90940800  | 2.00209800  | 1.45891100  | H | 0.38060900  | -0.91538500 | 3.42992100  |
| C | 4.74425200  | 2.70589200  | 0.59218300  | N | 1.15473900  | 0.08635500  | -2.40740200 |
| C | 4.62481700  | 2.51858600  | -0.78197300 | H | 0.84537900  | -0.68435900 | -2.99388600 |
| C | 3.67509600  | 1.62119300  | -1.26689300 | H | 1.46792800  | 0.87892100  | -2.95978800 |
| F | 2.17560400  | 0.46061000  | 1.79718500  | O | -1.56450400 | -0.45114500 | -2.53838300 |
| F | 4.01276100  | 2.18347000  | 2.78036600  | H | -2.47812100 | -0.77750800 | -2.48616500 |
| F | 5.64939000  | 3.56046000  | 1.07812300  |   |             |             |             |
| F | 5.41797500  | 3.19649500  | -1.62094700 |   |             |             |             |
| F | 3.59779900  | 1.49015000  | -2.61446800 |   |             |             |             |
| C | -2.18638200 | 1.97798200  | -0.02026900 | H | 0.000000    | 0.000000    | 0.371400    |
| C | -2.73087700 | 2.66367000  | -1.14045400 | H | 0.000000    | 0.000000    | -0.371400   |
| C | -2.65390300 | 4.06095600  | -1.18827900 |   |             |             |             |
| C | -2.05719100 | 4.81842300  | -0.17867600 |   |             |             |             |
| C | -1.52571000 | 4.13283600  | 0.91235400  |   |             |             |             |
| C | -1.58086100 | 2.73732300  | 1.01839400  |   |             |             |             |
| C | -3.40222600 | 1.98518300  | -2.31589700 |   |             |             |             |
| C | -2.01955900 | 6.32606700  | -0.25297400 |   |             |             |             |
| C | -0.97226100 | 2.12322800  | 2.26583200  |   |             |             |             |
| H | -0.74161700 | -1.48233300 | -0.95904000 |   |             |             |             |
| H | -7.15018800 | 0.03398200  | 0.19288900  |   |             |             |             |
| H | -5.26784300 | -3.51496200 | -1.24646000 |   |             |             |             |
| H | -1.05633400 | 4.69727300  | 1.71494600  |   |             |             |             |
| H | -3.07918000 | 4.57284600  | -2.04927500 |   |             |             |             |
| H | -6.01529800 | 1.50398000  | 1.44120800  |   |             |             |             |
| H | -4.28008600 | 1.42408000  | 1.74583200  |   |             |             |             |
| H | -4.87978900 | 2.25115800  | 0.31338900  |   |             |             |             |
| H | -2.20206600 | -2.81818200 | -1.66865700 |   |             |             |             |

## H<sub>2</sub> (hydrogen)

E= -1.1754824 au

|   |          |          |           |
|---|----------|----------|-----------|
| H | 0.000000 | 0.000000 | 0.371400  |
| H | 0.000000 | 0.000000 | -0.371400 |

## A<sub>5</sub>

E= -2453.3042293 au

|   |          |           |           |
|---|----------|-----------|-----------|
| C | 3.236260 | -1.668440 | -1.672379 |
| C | 2.092176 | -1.368097 | -0.931829 |
| C | 1.500987 | -2.437490 | -0.262970 |
| C | 2.004535 | -3.734772 | -0.321747 |
| C | 3.146577 | -3.990241 | -1.077894 |
| C | 3.770305 | -2.950008 | -1.763846 |
| B | 1.584075 | 0.139766  | -0.938392 |
| C | 2.436967 | 1.196201  | -0.147808 |
| C | 2.997893 | 0.916660  | 1.106886  |
| C | 3.733927 | 1.844272  | 1.835527  |
| C | 3.958626 | 3.108343  | 1.293609  |
| C | 3.436377 | 3.431761  | 0.042599  |
| C | 2.684687 | 2.484732  | -0.645509 |

|   |           |           |           |
|---|-----------|-----------|-----------|
| F | 2.801977  | -0.285038 | 1.682141  |
| F | 4.226348  | 1.537068  | 3.039259  |
| F | 4.671333  | 4.007039  | 1.971124  |
| F | 3.663518  | 4.640363  | -0.481240 |
| F | 2.219982  | 2.840128  | -1.854249 |
| F | 0.396649  | -2.237043 | 0.484548  |
| F | 1.402356  | -4.732028 | 0.334092  |
| F | 3.638830  | -5.229357 | -1.149596 |
| F | 4.862839  | -3.189949 | -2.497273 |
| F | 3.850121  | -0.676267 | -2.353568 |
| O | 0.354312  | 0.424594  | 3.411812  |
| C | 0.560149  | -0.727994 | 3.415166  |
| O | 0.762485  | -1.878212 | 3.439216  |
| C | 0.377049  | 0.550536  | -1.866454 |
| C | -0.889641 | -0.331561 | -1.768397 |
| P | -1.760607 | 0.073171  | -0.128040 |
| C | -2.624265 | 1.667767  | -0.635702 |
| C | -3.703111 | 1.740760  | -1.554141 |
| C | -4.237935 | 2.991506  | -1.889310 |
| C | -3.753535 | 4.182693  | -1.348380 |
| C | -2.703067 | 4.096873  | -0.433811 |
| C | -2.131891 | 2.872571  | -0.066336 |
| C | -4.356147 | 0.528912  | -2.185042 |
| C | -4.329726 | 5.518885  | -1.753562 |
| C | -1.005628 | 2.908711  | 0.949043  |
| C | -3.158469 | -1.128054 | 0.249000  |
| C | -3.930851 | -0.778229 | 1.392570  |
| C | -4.964924 | -1.617020 | 1.823573  |
| C | -5.259321 | -2.823191 | 1.191168  |
| C | -4.465060 | -3.180276 | 0.101611  |
| C | -3.423602 | -2.375014 | -0.376274 |
| C | -3.679010 | 0.474388  | 2.205527  |
| C | -2.629658 | -2.937001 | -1.536972 |
| C | -6.359937 | -3.728937 | 1.690792  |
| H | -0.605816 | -1.382960 | -1.774414 |
| H | -1.532876 | -0.155731 | -2.635447 |
| H | 0.110542  | 1.606749  | -1.769590 |
| H | 0.778871  | 0.446652  | -2.892656 |
| H | -4.657348 | -4.125919 | -0.401814 |
| H | -5.548339 | -1.315263 | 2.691420  |
| H | -1.598376 | -3.162542 | -1.241655 |
| H | -2.590971 | -2.260508 | -2.395237 |
| H | -3.078002 | -3.874108 | -1.880113 |

|   |           |           |           |
|---|-----------|-----------|-----------|
| H | -5.968453 | -4.487697 | 2.381911  |
| H | -6.845097 | -4.263357 | 0.866456  |
| H | -7.129381 | -3.165193 | 2.228926  |
| H | -3.942505 | 1.387894  | 1.661743  |
| H | -2.622620 | 0.562293  | 2.487370  |
| H | -4.268905 | 0.453632  | 3.127168  |
| H | -5.064885 | 3.030294  | -2.595991 |
| H | -2.313844 | 5.009637  | 0.013097  |
| H | -4.985036 | 0.833949  | -3.027577 |
| H | -4.992396 | -0.002519 | -1.468858 |
| H | -3.631707 | -0.198580 | -2.558610 |
| H | -5.366288 | 5.422689  | -2.093549 |
| H | -3.756103 | 5.964207  | -2.577667 |
| H | -4.308961 | 6.232970  | -0.923009 |
| H | -0.839206 | 3.935757  | 1.290101  |
| H | -0.061446 | 2.539902  | 0.536261  |
| H | -1.216469 | 2.290571  | 1.826696  |

### TS<sub>A56</sub>

E= -2453.2901708au

|   |           |           |           |
|---|-----------|-----------|-----------|
| C | 3.729335  | -2.131710 | 0.349958  |
| C | 3.479404  | -0.904641 | -0.318981 |
| C | 4.378956  | -0.491311 | -1.341619 |
| C | 5.511271  | -1.263795 | -1.620218 |
| C | 5.786787  | -2.454389 | -0.949530 |
| C | 4.876266  | -2.865707 | 0.023397  |
| P | 1.986569  | 0.197512  | -0.096993 |
| C | 0.375504  | -0.182998 | -2.027987 |
| O | 1.054232  | -0.459344 | -2.953614 |
| C | 4.176595  | 0.758925  | -2.171584 |
| C | 6.999128  | -3.287108 | -1.290891 |
| C | 2.824787  | -2.743096 | 1.399331  |
| C | 0.893867  | -0.244715 | 1.369024  |
| C | -0.426474 | 0.554819  | 1.279382  |
| B | -1.595232 | -0.003445 | 0.350654  |
| O | -0.695738 | 0.017763  | -1.514837 |
| C | -1.984298 | -1.559736 | 0.491377  |
| C | -1.246438 | -2.658328 | 0.044480  |
| C | -1.635464 | -3.981603 | 0.238892  |
| C | -2.814961 | -4.255550 | 0.923378  |
| C | -3.579624 | -3.198804 | 1.408171  |
| C | -3.155400 | -1.891628 | 1.184927  |
| F | -0.068634 | -2.491683 | -0.606064 |



|   |           |           |           |
|---|-----------|-----------|-----------|
| F | -3.927546 | -0.915268 | 1.704101  |
| F | -4.707756 | -3.444673 | 2.084514  |
| F | -3.200068 | -5.518079 | 1.126814  |
| F | -0.875808 | -4.986186 | -0.215531 |
| C | -2.777201 | 0.971987  | -0.100931 |
| C | -3.625476 | 0.637310  | -1.165816 |
| C | -4.663375 | 1.453084  | -1.604962 |
| C | -4.902551 | 2.661277  | -0.954896 |
| C | -4.099283 | 3.032513  | 0.118054  |
| C | -3.061864 | 2.193062  | 0.519960  |
| F | -3.451433 | -0.519612 | -1.827359 |
| F | -5.433880 | 1.087580  | -2.637148 |
| F | -5.896921 | 3.456387  | -1.358130 |
| F | -4.327482 | 4.188524  | 0.755278  |
| F | -2.339927 | 2.614718  | 1.577230  |
| C | 2.620089  | 1.877855  | 0.439918  |
| C | 3.555873  | 2.033692  | 1.495854  |
| C | 3.935558  | 3.323998  | 1.884893  |
| C | 3.430781  | 4.471120  | 1.271416  |
| C | 2.526368  | 4.299328  | 0.222928  |
| C | 2.112568  | 3.033705  | -0.208517 |
| C | 4.209244  | 0.877150  | 2.222506  |
| C | 3.831863  | 5.849929  | 1.738346  |
| C | 1.148194  | 2.980121  | -1.376285 |
| H | -0.875335 | 0.557409  | 2.287001  |
| H | 0.691108  | -1.312716 | 1.356894  |
| H | 6.192336  | -0.921404 | -2.396486 |
| H | 5.058275  | -3.798051 | 0.553820  |
| H | 2.128377  | 5.176677  | -0.282333 |
| H | 4.652462  | 3.430526  | 2.696474  |
| H | 4.905308  | 0.790421  | -2.987049 |
| H | 3.179696  | 0.778221  | -2.624230 |
| H | 4.296251  | 1.674619  | -1.583179 |
| H | 2.633698  | -2.071306 | 2.240918  |
| H | 1.859278  | -3.034606 | 0.972392  |
| H | 3.284032  | -3.648600 | 1.805970  |
| H | 7.348711  | -3.860248 | -0.425512 |
| H | 6.771470  | -4.007594 | -2.087865 |
| H | 7.827412  | -2.663639 | -1.644017 |
| H | 0.928428  | 3.991905  | -1.729813 |
| H | 1.563969  | 2.419223  | -2.220398 |
| H | 0.195530  | 2.510127  | -1.115049 |
| H | 3.844103  | 6.565938  | 0.909652  |

|   |           |           |          |
|---|-----------|-----------|----------|
| H | 3.125860  | 6.232706  | 2.487431 |
| H | 4.824988  | 5.844756  | 2.199517 |
| H | 4.923991  | 0.352191  | 1.580774 |
| H | 4.750317  | 1.241653  | 3.100863 |
| H | 3.488520  | 0.130608  | 2.567862 |
| H | -0.215678 | 1.610533  | 1.083180 |
| H | 1.411490  | -0.016070 | 2.305215 |

### A<sub>6</sub>

E= -2453.3110813 au

|   |           |           |           |
|---|-----------|-----------|-----------|
| P | 1.928982  | -0.125583 | -0.081329 |
| B | -1.369310 | 0.013398  | -0.125745 |
| O | -0.531295 | 0.043955  | 1.194582  |
| O | 1.256918  | 0.070632  | 2.537781  |
| C | 0.850948  | 0.343972  | -1.514691 |
| H | 0.622668  | 1.407502  | -1.468492 |
| H | 1.388732  | 0.147192  | -2.447708 |
| C | -0.443753 | -0.486692 | -1.374129 |
| H | -0.196026 | -1.552723 | -1.331217 |
| H | -1.008928 | -0.365051 | -2.305777 |
| C | 0.723667  | 0.004315  | 1.450968  |
| C | 3.386048  | 0.928800  | 0.363019  |
| C | 3.578744  | 2.234337  | -0.162681 |
| C | 4.713406  | 2.954990  | 0.225197  |
| H | 4.853391  | 3.952126  | -0.184669 |
| C | 5.658378  | 2.451777  | 1.117966  |
| C | 5.437605  | 1.177024  | 1.638270  |
| H | 6.150429  | 0.764872  | 2.348519  |
| C | 4.325581  | 0.401691  | 1.295136  |
| C | 2.631608  | 2.940436  | -1.109632 |
| H | 1.649834  | 3.091714  | -0.651731 |
| H | 2.495304  | 2.402423  | -2.053151 |
| H | 3.027418  | 3.928459  | -1.358573 |
| C | 6.854689  | 3.270622  | 1.536348  |
| H | 6.645177  | 3.820758  | 2.463114  |
| H | 7.123573  | 4.007304  | 0.772639  |
| H | 7.727724  | 2.637156  | 1.725468  |
| C | 4.217606  | -0.955151 | 1.959791  |
| H | 4.465381  | -1.773388 | 1.275907  |
| H | 3.216684  | -1.123230 | 2.360646  |
| H | 4.916230  | -1.006195 | 2.799770  |
| C | 2.498315  | -1.837471 | -0.504874 |
| C | 3.488652  | -1.959443 | -1.517299 |

C 3. 887193 -3. 239327 -1. 917440  
H 4. 639016 -3. 325379 -2. 698470  
C 3. 355148 -4. 399445 -1. 355302  
C 2. 387155 -4. 252369 -0. 360953  
H 1. 952947 -5. 142059 0. 088412  
C 1. 941621 -3. 003307 0. 084990  
C 4. 187566 -0. 791250 -2. 185998  
H 4. 701042 -1. 135173 -3. 088258  
H 4. 937796 -0. 342723 -1. 526225  
H 3. 509583 0. 011848 -2. 488075  
C 3. 820555 -5. 767264 -1. 791323  
H 4. 284421 -5. 736421 -2. 782113  
H 2. 989272 -6. 479449 -1. 824627  
H 4. 564603 -6. 169770 -1. 091392  
C 0. 897216 -2. 999726 1. 180202  
H 0. 643063 -4. 027402 1. 452341  
H -0. 030547 -2. 508292 0. 874817  
H 1. 249096 -2. 498154 2. 086882  
C -2. 618457 -0. 971129 0. 274342  
C -3. 380058 -0. 690305 1. 415320  
F -3. 105812 0. 401004 2. 155125  
C -4. 443645 -1. 478280 1. 848413  
F -5. 131988 -1. 158464 2. 954434  
C -4. 796619 -2. 608383 1. 116679  
F -5. 814882 -3. 381912 1. 514431  
C -4. 081126 -2. 924191 -0. 032331  
F -4. 413339 -4. 009573 -0. 749724  
C -3. 022376 -2. 107280 -0. 428418  
F -2. 392323 -2. 483583 -1. 565230  
C -1. 902235 1. 547778 -0. 411872  
C -3. 010566 1. 763370 -1. 237667  
F -3. 634906 0. 713037 -1. 813559  
C -3. 524277 3. 022785 -1. 537968  
F -4. 594997 3. 156093 -2. 333533  
C -2. 908058 4. 154484 -1. 011583  
F -3. 377549 5. 376020 -1. 293626  
C -1. 783439 3. 999948 -0. 209283  
F -1. 151596 5. 080040 0. 275775  
C -1. 311075 2. 717655 0. 065580  
F -0. 172292 2. 669151 0. 810245

P 1. 92806600 -0. 15664900 -0. 09619200  
B -1. 36983800 -0. 01155000 -0. 13689300  
O -0. 52939100 0. 04140900 1. 18028600  
O 1. 26035600 0. 06871300 2. 52148300  
C 0. 84826500 0. 29716300 -1. 53328600  
H 0. 62129700 1. 36151400 -1. 50012200  
H 1. 38401000 0. 08820900 -2. 46485900  
C -0. 44706200 -0. 53008300 -1. 37961600  
H -0. 20045200 -1. 59561900 -1. 32197700  
H -1. 01368300 -0. 42111400 -2. 31187600  
C 0. 72575400 -0. 00532700 1. 43588700  
C 3. 38684400 0. 90157500 0. 33282100  
C 3. 57752700 2. 20185600 -0. 20628000  
C 4. 71414200 2. 92575300 0. 16955000  
H 4. 85246900 3. 91901400 -0. 25013500  
C 5. 66267100 2. 43083800 1. 06318100  
C 5. 44313000 1. 16172900 1. 59772500  
H 6. 15831600 0. 75669600 2. 30969800  
C 4. 32921300 0. 38369700 1. 26722000  
C 2. 62557800 2. 89923800 -1. 15477800  
H 1. 64449600 3. 05030200 -0. 69519000  
H 2. 48853100 2. 35523700 -2. 09480000  
H 3. 01733300 3. 88712500 -1. 41044900  
C 6. 86118400 3. 25305300 1. 46838200  
H 6. 65705800 3. 80967800 2. 39246400  
H 7. 12515300 3. 98434400 0. 69782500  
H 7. 73557100 2. 62120400 1. 65674400  
C 4. 22183800 -0. 96541700 1. 94758300  
H 4. 46856600 -1. 79163900 1. 27296400  
H 3. 22145100 -1. 12871900 2. 35184200  
H 4. 92160000 -1. 00679900 2. 78715700  
C 2. 49373500 -1. 87444300 -0. 49979300  
C 3. 48317100 -2. 01049000 -1. 51120300  
C 3. 87957200 -3. 29594900 -1. 89545800  
H 4. 63083500 -3. 39300000 -2. 67572600  
C 3. 34628500 -4. 44804900 -1. 31829700  
C 2. 37913000 -4. 28707800 -0. 32517400  
H 1. 94405000 -5. 17040800 0. 13577300  
C 1. 93575000 -3. 03192100 0. 10526400  
C 4. 18308100 -0. 85155400 -2. 19469700  
H 4. 69627700 -1. 20719700 -3. 09255700  
H 4. 93349500 -0. 39525700 -1. 54050000  
H 3. 50553800 -0. 05187000 -2. 50674600

## A7

E= -2454.488293au

|   |             |             |             |   |             |             |             |
|---|-------------|-------------|-------------|---|-------------|-------------|-------------|
| C | 3.80899700  | -5.82211800 | -1.73719000 | H | 0.11686800  | 1.33877900  | -1.20182600 |
| H | 4.28690700  | -5.80201600 | -2.72151700 | H | 0.87875300  | 0.16076600  | -2.21759100 |
| H | 2.97356900  | -6.52920700 | -1.77680600 | C | -0.44919700 | -0.49760600 | 1.85508500  |
| H | 4.54016200  | -6.22404700 | -1.02352400 | C | -3.67462500 | -1.02822300 | 0.13971000  |
| C | 0.89215000  | -3.01274800 | 1.20108000  | C | -4.03251500 | -2.13017400 | -0.68269600 |
| H | 0.63671700  | -4.03644300 | 1.48668300  | C | -5.22214000 | -2.81872200 | -0.41349600 |
| H | -0.03523300 | -2.52417700 | 0.88984900  | H | -5.48889600 | -3.65425900 | -1.05690400 |
| H | 1.24536100  | -2.49984800 | 2.10082600  | C | -6.07369100 | -2.47842400 | 0.63743500  |
| C | -2.61790800 | -0.99054400 | 0.28019400  | C | -5.69933900 | -1.40499400 | 1.44493400  |
| C | -3.37720300 | -0.69376800 | 1.41865800  | H | -6.33849800 | -1.11820200 | 2.27688900  |
| F | -3.10146300 | 0.40783900  | 2.14244700  | C | -4.51958500 | -0.68515200 | 1.23368700  |
| C | -4.43978800 | -1.47569200 | 1.86501800  | C | -3.22265500 | -2.64399600 | -1.85606100 |
| F | -5.12581800 | -1.14041400 | 2.96783700  | H | -2.27244400 | -3.08941000 | -1.54217400 |
| C | -4.79423200 | -2.61591000 | 1.14984000  | H | -2.99545800 | -1.86648000 | -2.58924400 |
| F | -5.81161500 | -3.38377900 | 1.56044300  | H | -3.78142300 | -3.42603800 | -2.37745300 |
| C | -4.08113800 | -2.94772300 | 0.00383900  | C | -7.33356500 | -3.26387500 | 0.90919200  |
| F | -4.41478300 | -4.04305100 | -0.69755600 | H | -7.13312300 | -4.10682300 | 1.58385800  |
| C | -3.02332400 | -2.13638000 | -0.40593700 | H | -7.75416000 | -3.67893500 | -0.01275700 |
| F | -2.39562300 | -2.52865400 | -1.53862800 | H | -8.09900700 | -2.64194000 | 1.38471200  |
| C | -1.90697000 | 1.51719000  | -0.44656600 | C | -4.20920400 | 0.43596700  | 2.20380100  |
| C | -3.00986300 | 1.71485600  | -1.28422000 | H | -4.22227800 | 1.41783300  | 1.71884900  |
| F | -3.62146300 | 0.65294100  | -1.85220700 | H | -3.22845800 | 0.30525200  | 2.67397100  |
| C | -3.53091200 | 2.96647100  | -1.60400200 | H | -4.95193000 | 0.45431400  | 3.00656000  |
| F | -4.59561700 | 3.08168600  | -2.41013500 | C | -2.56893600 | 1.75321000  | -0.35919700 |
| C | -2.92873100 | 4.10926100  | -1.08533700 | C | -2.04987400 | 2.80710900  | 0.43248900  |
| F | -3.40541900 | 5.32360900  | -1.38461000 | C | -2.38789700 | 4.12745200  | 0.11218200  |
| C | -1.80972600 | 3.97191900  | -0.27226400 | H | -1.98363400 | 4.92812800  | 0.72708300  |
| F | -1.19211900 | 5.06392300  | 0.20760000  | C | -3.21837000 | 4.44656100  | -0.96125600 |
| C | -1.32897800 | 2.69723300  | 0.02160600  | C | -3.72825800 | 3.39244300  | -1.72087600 |
| F | -0.19613500 | 2.66651700  | 0.77734300  | H | -4.38697500 | 3.61492600  | -2.55735900 |
| H | 0.88914700  | 5.12268900  | 2.78218400  | C | -3.42818700 | 2.05278300  | -1.45046600 |
| H | 0.47934000  | 4.82247600  | 2.24065500  | C | -1.13206400 | 2.59228900  | 1.61372900  |

## TSA78

E= -2454.354627au

|   |             |             |             |   |             |            |             |
|---|-------------|-------------|-------------|---|-------------|------------|-------------|
| P | -2.09655300 | -0.02100200 | 0.03600100  | C | -3.53691800 | 5.88148600 | -1.30482900 |
| B | 1.41373200  | -0.13819400 | -0.08192000 | H | -3.52606000 | 6.51890000 | -0.41466800 |
| O | 0.61163100  | -0.10170400 | 1.32082100  | H | -4.51961100 | 5.97211800 | -1.77931200 |
| O | -0.96355100 | -0.43699800 | 2.93620200  | H | -2.79695600 | 6.28902300 | -2.00634700 |
| C | -0.95928600 | -0.52359700 | -1.37034700 | C | -4.06986300 | 1.01542000 | -2.34548900 |
| H | -0.76982400 | -1.59907400 | -1.28785400 | H | -4.59090100 | 1.50554700 | -3.17280700 |
| H | -1.43662800 | -0.35371300 | -2.33727700 | H | -4.80013300 | 0.40370700 | -1.80659800 |
| C | 0.35957900  | 0.27211900  | -1.25965000 | H | -3.33795300 | 0.33243700 | -2.78593400 |

|   |             |             |             |
|---|-------------|-------------|-------------|
| C | 2.53918300  | 1.02570800  | 0.17744100  |
| C | 3.33166400  | 0.96066300  | 1.33168200  |
| F | 3.15538100  | -0.04902300 | 2.20776600  |
| C | 4.32310100  | 1.88471100  | 1.64870300  |
| F | 5.03757000  | 1.76941100  | 2.77729600  |
| C | 4.57751100  | 2.93402800  | 0.77045200  |
| F | 5.52515700  | 3.83623200  | 1.05070600  |
| C | 3.83762000  | 3.03191200  | -0.40180700 |
| F | 4.07904800  | 4.03357900  | -1.26102100 |
| C | 2.84990400  | 2.08552900  | -0.67865100 |
| F | 2.20048800  | 2.25892100  | -1.84914100 |
| C | 2.09659000  | -1.60867200 | -0.28799400 |
| C | 2.93755300  | -1.78347700 | -1.39406500 |
| F | 3.13711600  | -0.75655400 | -2.25019900 |
| C | 3.60686600  | -2.96823400 | -1.68549300 |
| F | 4.39512500  | -3.06476200 | -2.76468900 |
| C | 3.45106100  | -4.06236800 | -0.83892000 |
| F | 4.07921900  | -5.21448400 | -1.09913800 |
| C | 2.62934700  | -3.94409500 | 0.27583600  |
| F | 2.46376500  | -4.99005800 | 1.09750300  |
| C | 1.98127500  | -2.73474100 | 0.52838700  |
| F | 1.19708600  | -2.72026300 | 1.63409200  |
| H | -0.83921900 | -1.63242600 | 1.22940500  |
| H | -1.35168300 | -1.06045800 | 0.86508100  |

## A8

E= -2454.514926au

|   |             |             |             |
|---|-------------|-------------|-------------|
| P | -2.08653600 | 0.42378000  | -0.16212500 |
| B | 1.48940100  | 0.15878800  | -0.06177000 |
| O | 0.68770300  | 0.42265800  | 1.21472500  |
| O | -0.01731500 | 0.15211400  | 3.30312200  |
| C | -0.82771200 | 0.03982600  | -1.46977700 |
| H | -0.68801500 | -1.04279600 | -1.46581500 |
| H | -1.28035000 | 0.30764100  | -2.43118500 |
| C | 0.52374400  | 0.77135300  | -1.25131200 |
| H | 0.33408900  | 1.83857400  | -1.09714300 |
| H | 1.04905800  | 0.71330000  | -2.21366900 |
| C | 0.82278300  | -0.04243800 | 2.44163300  |
| C | -3.31342300 | -0.89084300 | 0.23241600  |
| C | -3.64355800 | -1.97145000 | -0.62336300 |
| C | -4.57512900 | -2.91592600 | -0.17723900 |
| H | -4.82990800 | -3.74018500 | -0.83906600 |
| C | -5.17445700 | -2.84639300 | 1.08028900  |

|   |             |             |             |
|---|-------------|-------------|-------------|
| C | -4.82357900 | -1.78000600 | 1.91043700  |
| H | -5.27406500 | -1.70473200 | 2.89712200  |
| C | -3.90443000 | -0.80201900 | 1.52413800  |
| C | -3.03120000 | -2.22152500 | -1.98561600 |
| H | -2.05184500 | -2.70618900 | -1.89244200 |
| H | -2.89719700 | -1.31577500 | -2.57906100 |
| H | -3.66814800 | -2.89811000 | -2.56243200 |
| C | -6.14698600 | -3.90376800 | 1.54189400  |
| H | -5.63511800 | -4.66550600 | 2.14442900  |
| H | -6.61573900 | -4.41596100 | 0.69574400  |
| H | -6.93853700 | -3.47522700 | 2.16573900  |
| C | -3.56933500 | 0.28537600  | 2.52215500  |
| H | -3.71597900 | 1.28894800  | 2.10752300  |
| H | -2.53117600 | 0.20949500  | 2.87323100  |
| H | -4.21592300 | 0.19925500  | 3.39960300  |
| C | -2.83889900 | 2.07818400  | -0.44072200 |
| C | -3.84273300 | 2.26425100  | -1.42604500 |
| C | -4.39335900 | 3.53524300  | -1.59794500 |
| H | -5.16148600 | 3.67157900  | -2.35571100 |
| C | -3.98483300 | 4.63204000  | -0.83438000 |
| C | -2.98292700 | 4.42967300  | 0.11482700  |
| H | -2.63875200 | 5.27414000  | 0.70659400  |
| C | -2.39110800 | 3.17999100  | 0.33814100  |
| C | -4.33668600 | 1.15236500  | -2.32364100 |
| H | -5.14217300 | 1.51287100  | -2.96924800 |
| H | -4.72306400 | 0.29993000  | -1.75644400 |
| H | -3.54219900 | 0.78203200  | -2.98320400 |
| C | -4.62044100 | 5.98793400  | -1.02181600 |
| H | -4.86096800 | 6.17560000  | -2.07367700 |
| H | -3.96340000 | 6.79021000  | -0.67219800 |
| H | -5.55866900 | 6.06096400  | -0.45605800 |
| C | -1.30092100 | 3.10318500  | 1.38742900  |
| H | -1.11744900 | 4.09874700  | 1.80030000  |
| H | -0.35487100 | 2.73107200  | 0.98514000  |
| H | -1.55595300 | 2.44530200  | 2.22528500  |
| C | 2.93860900  | 0.94180600  | 0.10496800  |
| C | 3.95011300  | 0.40721200  | 0.90981200  |
| F | 3.76982700  | -0.79363100 | 1.51531600  |
| C | 5.17364000  | 1.02342800  | 1.15410300  |
| F | 6.09349100  | 0.44309000  | 1.93926700  |
| C | 5.43878200  | 2.25809800  | 0.57030800  |
| F | 6.60680500  | 2.87600500  | 0.78775400  |
| C | 4.47161300  | 2.84106600  | -0.23874500 |

|   |             |             |             |
|---|-------------|-------------|-------------|
| F | 4.70859800  | 4.03371400  | -0.80792600 |
| C | 3.25994400  | 2.18221500  | -0.45123000 |
| F | 2.38954700  | 2.83844800  | -1.25468400 |
| C | 1.69565100  | -1.46116700 | -0.35040600 |
| C | 2.69951200  | -1.93370000 | -1.20278000 |
| F | 3.55872000  | -1.06925100 | -1.78373600 |
| C | 2.88343400  | -3.27731000 | -1.52212500 |
| F | 3.87382900  | -3.65852400 | -2.34171500 |
| C | 2.02062500  | -4.23209100 | -0.99232200 |
| F | 2.17439600  | -5.52840300 | -1.29167600 |
| C | 0.98481200  | -3.81755800 | -0.16357400 |
| F | 0.12058500  | -4.71813900 | 0.33220300  |
| C | 0.84447100  | -2.46041900 | 0.12540900  |
| F | -0.22700300 | -2.14229000 | 0.90408200  |
| H | -1.33582600 | 0.55750400  | 1.01166600  |
| H | 1.74634000  | -0.61047500 | 2.63344400  |

## TSA8

E= -2454.486696au

|   |             |             |             |
|---|-------------|-------------|-------------|
| P | -2.03851100 | 0.29349300  | 0.02016800  |
| B | 1.59661300  | 0.05795200  | -0.37729600 |
| O | 0.61043900  | 0.17673800  | 1.49858200  |
| O | -0.16020200 | -0.32366400 | 3.56344400  |
| C | -0.91603400 | -0.10514100 | -1.44313800 |
| H | -0.74135200 | -1.18028600 | -1.46140700 |
| H | -1.38631000 | 0.16631100  | -2.39238100 |
| C | 0.41990000  | 0.66097900  | -1.27706400 |
| H | 0.21803800  | 1.70931600  | -1.03229600 |
| H | 0.89163700  | 0.71468400  | -2.27361300 |
| C | 0.74836200  | -0.25759000 | 2.77656900  |
| C | -3.43107100 | -0.93181800 | 0.26057100  |
| C | -3.75016400 | -2.05339500 | -0.54747200 |
| C | -4.79787200 | -2.89994900 | -0.16130200 |
| H | -5.03002500 | -3.75342700 | -0.79516600 |
| C | -5.54726800 | -2.69424900 | 0.99634900  |
| C | -5.20193100 | -1.60673800 | 1.79835700  |
| H | -5.74985500 | -1.43299000 | 2.72202800  |
| C | -4.15973700 | -0.73557100 | 1.46773800  |
| C | -3.01051000 | -2.44134600 | -1.81060900 |
| H | -2.02952200 | -2.87379700 | -1.57991300 |
| H | -2.85271600 | -1.59949100 | -2.48741700 |
| H | -3.57461500 | -3.20256600 | -2.35773200 |
| C | -6.69522600 | -3.60519300 | 1.36009400  |

|   |             |             |             |
|---|-------------|-------------|-------------|
| H | -7.63819300 | -3.24767100 | 0.92467300  |
| H | -6.83756300 | -3.65573100 | 2.44483800  |
| H | -6.53258800 | -4.62327100 | 0.99048000  |
| C | -3.83838900 | 0.37088000  | 2.45049900  |
| H | -3.94835600 | 1.36702200  | 2.00758100  |
| H | -2.81132900 | 0.28155100  | 2.82621200  |
| H | -4.51138800 | 0.31863200  | 3.31169500  |
| C | -2.79833700 | 1.93978700  | -0.44832900 |
| C | -3.74640400 | 2.10821500  | -1.49192000 |
| C | -4.24644100 | 3.38542500  | -1.76622300 |
| H | -4.97129300 | 3.49790800  | -2.57017000 |
| C | -3.84731400 | 4.51518100  | -1.04948600 |
| C | -2.90996900 | 4.33757600  | -0.03290700 |
| H | -2.57698800 | 5.20292100  | 0.53608100  |
| C | -2.37941600 | 3.08082000  | 0.28651200  |
| C | -4.24993200 | 0.97073800  | -2.35171900 |
| H | -5.02816800 | 1.32467200  | -3.03453200 |
| H | -4.66928900 | 0.15744400  | -1.75414900 |
| H | -3.45171300 | 0.54261900  | -2.96959600 |
| C | -4.42931000 | 5.87547600  | -1.35169000 |
| H | -5.40196000 | 6.00727200  | -0.85898400 |
| H | -4.59121300 | 6.01242700  | -2.42657500 |
| H | -3.77371500 | 6.67908500  | -1.00093800 |
| C | -1.36821000 | 3.02845100  | 1.41651300  |
| H | -1.25461900 | 4.02147100  | 1.86235100  |
| H | -0.37731300 | 2.71105500  | 1.07526500  |
| H | -1.66798300 | 2.33985500  | 2.21278500  |
| C | 2.83551300  | 0.99739300  | 0.00664300  |
| C | 3.77173200  | 0.61203200  | 0.97536400  |
| F | 3.62647800  | -0.56660700 | 1.62274300  |
| C | 4.86655900  | 1.38165800  | 1.35100300  |
| F | 5.71227100  | 0.95748700  | 2.29752000  |
| C | 5.08024200  | 2.60707100  | 0.72454200  |
| F | 6.12679200  | 3.36257100  | 1.06323200  |
| C | 4.19209700  | 3.03469900  | -0.25585800 |
| F | 4.39119100  | 4.20674500  | -0.87055200 |
| C | 3.09930000  | 2.23612400  | -0.59192200 |
| F | 2.30323800  | 2.72207600  | -1.56280700 |
| C | 1.90850600  | -1.51306200 | -0.51941600 |
| C | 3.03737300  | -1.91495400 | -1.24475500 |
| F | 3.85681500  | -0.98745200 | -1.78122800 |
| C | 3.37234900  | -3.24558000 | -1.47965500 |
| F | 4.46459300  | -3.56110600 | -2.18542300 |

|   |             |             |             |
|---|-------------|-------------|-------------|
| C | 2.55542800  | -4.25255200 | -0.97433800 |
| F | 2.85716600  | -5.53615800 | -1.18557700 |
| C | 1.41455400  | -3.90758400 | -0.25656000 |
| F | 0.61193100  | -4.86561900 | 0.22288800  |
| C | 1.11195100  | -2.56259600 | -0.05269200 |
| F | -0.02326400 | -2.31562300 | 0.63857800  |
| H | -0.38858300 | 0.27779000  | 1.26673100  |
| H | 1.79277700  | -0.51751900 | 2.98534600  |

## B<sub>5</sub>

E= -2492.6143853au

|   |           |           |           |
|---|-----------|-----------|-----------|
| C | -2.769027 | -2.120701 | -0.668452 |
| C | -2.346271 | -1.081271 | 0.203117  |
| C | -2.191160 | -1.390778 | 1.587268  |
| C | -2.422605 | -2.690560 | 2.046539  |
| C | -2.789600 | -3.728482 | 1.188519  |
| C | -2.975248 | -3.409963 | -0.155326 |
| P | -1.733795 | 0.642474  | -0.225699 |
| C | 4.419111  | -1.595054 | 2.126902  |
| O | 4.271249  | -2.681208 | 1.720726  |
| C | -1.748062 | -0.363411 | 2.610032  |
| C | -2.940829 | -5.146058 | 1.685096  |
| C | -3.032982 | -1.968942 | -2.154384 |
| C | -1.357407 | 0.794106  | -2.106358 |
| C | 0.121696  | 1.244989  | -2.230837 |
| B | 1.183996  | 0.560406  | -1.271060 |
| O | 4.577382  | -0.514051 | 2.544416  |
| C | 1.064763  | -0.984380 | -0.932856 |
| C | 1.277894  | -1.489903 | 0.355406  |
| C | 1.084662  | -2.819353 | 0.703250  |
| C | 0.679361  | -3.725278 | -0.274195 |
| C | 0.483581  | -3.283048 | -1.578122 |
| C | 0.675705  | -1.937926 | -1.879025 |
| F | 1.661570  | -0.656590 | 1.346872  |
| F | 0.450664  | -1.572417 | -3.160191 |
| F | 0.076492  | -4.138927 | -2.524451 |
| F | 0.468025  | -5.005156 | 0.042618  |
| F | 1.274900  | -3.232056 | 1.960761  |
| C | 2.469799  | 1.356891  | -0.790602 |
| C | 3.694536  | 0.717019  | -0.521027 |
| C | 4.853875  | 1.380634  | -0.135929 |
| C | 4.833883  | 2.763733  | 0.007936  |
| C | 3.653259  | 3.456013  | -0.243797 |

|   |           |           |           |
|---|-----------|-----------|-----------|
| C | 2.516906  | 2.756574  | -0.640281 |
| F | 3.817993  | -0.618878 | -0.637114 |
| F | 5.978749  | 0.698161  | 0.102482  |
| F | 5.931513  | 3.418586  | 0.381521  |
| F | 3.619938  | 4.786067  | -0.108148 |
| F | 1.431342  | 3.523501  | -0.854101 |
| C | -3.105427 | 1.855276  | 0.214320  |
| C | -4.500863 | 1.675780  | 0.009363  |
| C | -5.392971 | 2.669585  | 0.430141  |
| C | -4.971859 | 3.845504  | 1.051822  |
| C | -3.603014 | 4.009443  | 1.255191  |
| C | -2.667561 | 3.043784  | 0.862918  |
| C | -5.111421 | 0.461879  | -0.652882 |
| C | -5.965849 | 4.883702  | 1.515357  |
| C | -1.213194 | 3.334945  | 1.177589  |
| H | 0.458552  | 1.027447  | -3.261616 |
| H | -1.430349 | -0.207943 | -2.520926 |
| H | -2.292619 | -2.899056 | 3.106408  |
| H | -3.294278 | -4.191986 | -0.842342 |
| H | -3.244489 | 4.913891  | 1.742185  |
| H | -6.456920 | 2.515141  | 0.260970  |
| H | -1.770251 | -0.796391 | 3.615123  |
| H | -0.724992 | -0.022522 | 2.411545  |
| H | -2.389773 | 0.524251  | 2.616292  |
| H | -3.390489 | -0.976364 | -2.425613 |
| H | -2.138090 | -2.180097 | -2.753689 |
| H | -3.795386 | -2.689513 | -2.468486 |
| H | -3.730392 | -5.681215 | 1.146080  |
| H | -2.007432 | -5.705297 | 1.535690  |
| H | -3.175230 | -5.176494 | 2.754273  |
| H | -1.130142 | 4.281955  | 1.720964  |
| H | -0.766046 | 2.549821  | 1.796467  |
| H | -0.594326 | 3.417838  | 0.280951  |
| H | -6.380642 | 4.623633  | 2.498573  |
| H | -5.500650 | 5.870587  | 1.608472  |
| H | -6.809892 | 4.969145  | 0.821941  |
| H | -4.817945 | -0.468704 | -0.161943 |
| H | -6.203506 | 0.527178  | -0.629179 |
| H | -4.817576 | 0.379904  | -1.704606 |
| H | 0.172873  | 2.331749  | -2.141800 |
| C | -2.279812 | 1.727060  | -2.900429 |
| H | -3.312247 | 1.365789  | -2.931514 |
| H | -2.298278 | 2.733699  | -2.468650 |

---

H -1.925476 1.815009 -3.935737

**TS<sub>B56</sub>**

E= -2492.5945752au

C -3.559769 -2.272909 -0.198398  
C -3.379960 -0.985252 0.374846  
C -4.282717 -0.563832 1.392799  
C -5.362177 -1.384080 1.740907  
C -5.580077 -2.626946 1.150728  
C -4.657161 -3.048460 0.194219  
P -1.954761 0.181869 0.053373  
C -0.374288 -0.165165 2.015700  
O -1.079782 -0.440418 2.922903  
C -4.151714 0.740342 2.153704  
C -6.737277 -3.504566 1.563474  
C -2.621552 -2.915832 -1.198461  
C -0.837637 -0.223926 -1.447605  
C 0.480499 0.576016 -1.252959  
B 1.639324 0.028600 -0.305975  
O 0.717906 0.035807 1.548893  
C 2.056440 -1.518706 -0.456611  
C 1.344411 -2.631180 -0.004960  
C 1.752267 -3.946638 -0.212255  
C 2.927352 -4.196753 -0.913315  
C 3.667889 -3.124488 -1.401915  
C 3.224152 -1.825900 -1.166421  
F 0.172585 -2.485124 0.660051  
F 3.971344 -0.832415 -1.690152  
F 4.791202 -3.347653 -2.094074  
F 3.330818 -5.451496 -1.129381  
F 1.013896 -4.965933 0.244633  
C 2.805554 1.017798 0.159368  
C 3.646721 0.686406 1.230974  
C 4.674454 1.508761 1.681962  
C 4.909982 2.721063 1.038387  
C 4.113121 3.089727 -0.040153  
C 3.086026 2.243552 -0.454150  
F 3.476375 -0.474164 1.886737  
F 5.438723 1.145465 2.719520  
F 5.894591 3.522501 1.452959  
F 4.337427 4.249841 -0.671361  
F 2.370095 2.664539 -1.516166  
C -2.685861 1.848471 -0.395901

C -3.788157 2.003714 -1.279751  
C -4.207755 3.293826 -1.627063  
C -3.600342 4.443915 -1.122679  
C -2.548408 4.274472 -0.223139  
C -2.086946 3.010098 0.162501  
C -4.609195 0.861331 -1.841124  
C -4.090720 5.818874 -1.509159  
C -0.995162 2.974017 1.213857  
H 0.978182 0.602547 -2.238343  
H -0.619839 -1.288408 -1.359679  
H -6.046789 -1.035283 2.511211  
H -4.785449 -4.026232 -0.265331  
H -2.071043 5.153718 0.203535  
H -5.043697 3.396422 -2.316422  
H -4.804624 0.723356 3.031555  
H -3.130676 0.897073 2.513637  
H -4.430166 1.609804 1.549497  
H -2.485798 -2.320969 -2.104935  
H -1.635882 -3.096222 -0.759013  
H -3.017425 -3.887138 -1.508496  
H -7.115428 -4.092368 0.719928  
H -6.435791 -4.215341 2.344514  
H -7.566322 -2.912324 1.964694  
H -0.728433 3.992727 1.510569  
H -1.328523 2.447512 2.115674  
H -0.080462 2.482115 0.875422  
H -4.984732 6.095961 -0.934785  
H -3.330207 6.583215 -1.320492  
H -4.362499 5.863207 -2.569631  
H -5.389394 0.559622 -1.131576  
H -5.106804 1.173447 -2.764944  
H -4.025308 -0.031136 -2.056600  
H 0.249171 1.627594 -1.060080  
C -1.407102 0.060064 -2.846554  
H -2.303896 -0.519524 -3.078585  
H -1.650747 1.120322 -2.966989  
H -0.650467 -0.194785 -3.599434

**B<sub>6</sub>**

E= -2492.609743au

P -1.868054 -0.143870 -0.176015  
B 1.484489 -0.246848 -0.170734  
O 0.593111 -0.376519 1.106844

O -1.203822 -0.932300 2.316511  
 C -0.774766 0.108881 -1.708565  
 H -1.304925 -0.351552 -2.548403  
 C 0.582398 -0.603055 -1.491797  
 H 1.174020 -0.420892 -2.393200  
 H 0.402218 -1.678779 -1.477401  
 C -0.660351 -0.547522 1.302195  
 C -3.092545 -1.553247 -0.148806  
 C -3.000726 -2.683847 -1.008062  
 C -4.020862 -3.641249 -0.978255  
 H -3.939431 -4.496791 -1.643921  
 C -5.114050 -3.556439 -0.118505  
 C -5.139834 -2.487178 0.773583  
 H -5.947227 -2.425056 1.499197  
 C -4.158676 -1.488972 0.797025  
 C -1.830711 -3.009796 -1.911468  
 H -2.032517 -3.937295 -2.453530  
 H -0.921468 -3.172021 -1.324887  
 H -1.620109 -2.245023 -2.661896  
 C -6.214757 -4.587842 -0.142882  
 H -5.839153 -5.567630 -0.455357  
 H -7.004960 -4.300843 -0.849488  
 H -6.682038 -4.697896 0.841047  
 C -4.327610 -0.437093 1.877001  
 H -3.376247 -0.176423 2.340432  
 H -4.971356 -0.839493 2.664893  
 H -4.802060 0.474990 1.501398  
 C -2.821494 1.433815 0.034011  
 C -3.877327 1.677196 -0.885753  
 C -4.605890 2.865948 -0.775966  
 H -5.414194 3.044545 -1.481400  
 C -4.328148 3.826793 0.196816  
 C -3.271440 3.574294 1.071624  
 H -3.026174 4.313824 1.830052  
 C -2.501694 2.406325 1.016622  
 C -4.293455 0.725691 -1.991176  
 H -3.445777 0.274110 -2.514547  
 H -4.882326 1.264500 -2.739091  
 H -4.910680 -0.094861 -1.610410  
 C -5.115095 5.112092 0.276628  
 H -5.277290 5.417291 1.315882  
 H -6.091599 5.015567 -0.208190  
 H -4.579199 5.930795 -0.221263

C -1.391629 2.276061 2.035654  
 H -1.617123 1.520130 2.794715  
 H -1.249356 3.229077 2.551954  
 H -0.430971 2.005518 1.594392  
 C 2.152771 1.262094 -0.126349  
 C 2.333578 2.001143 1.049219  
 F 1.927536 1.523486 2.244690  
 C 2.922544 3.266257 1.092937  
 F 3.040071 3.921587 2.258048  
 C 3.394624 3.846681 -0.076797  
 F 3.961786 5.059159 -0.056960  
 C 3.264051 3.147477 -1.272043  
 F 3.717621 3.685509 -2.414581  
 C 2.666085 1.891335 -1.266649  
 F 2.608734 1.281373 -2.476150  
 C 2.600888 -1.448081 0.026749  
 C 3.987342 -1.320385 -0.095032  
 F 4.558020 -0.134278 -0.390774  
 C 4.879829 -2.381198 0.069586  
 F 6.200186 -2.185842 -0.060294  
 C 4.396752 -3.649007 0.368776  
 F 5.238662 -4.677547 0.528321  
 C 3.023626 -3.836488 0.492720  
 F 2.535234 -5.055205 0.769764  
 C 2.173451 -2.749332 0.317854  
 F 0.847138 -3.025106 0.434403  
 C -0.625901 1.607804 -2.031829  
 H -0.257488 2.186518 -1.181655  
 H 0.112995 1.700858 -2.833695  
 H -1.562283 2.056512 -2.371198

**B7**

**E= -2493.795986au**

P -1.92177000 0.12647400 -0.08892800  
 B 1.37837000 0.04330900 -0.07613700  
 O 0.53534700 -0.05359800 1.22632100  
 O -1.27976300 -0.04438300 2.53091400  
 C -0.81306800 -0.30303700 -1.54842200  
 H -0.54249300 -1.35091800 -1.40823800  
 C 0.45465000 0.55633000 -1.32030600  
 H 0.17747500 1.61492300 -1.26297800  
 H 1.05303500 0.47899400 -2.23638500  
 C -0.72455300 0.00616100 1.45397700



|   |             |             |             |
|---|-------------|-------------|-------------|
| C | -3.31945400 | -0.99543500 | 0.39892400  |
| C | -3.41177100 | -2.33818900 | -0.05616200 |
| C | -4.50616100 | -3.11230600 | 0.34507900  |
| H | -4.56915600 | -4.13677700 | -0.01319900 |
| C | -5.49959200 | -2.63070100 | 1.19556900  |
| C | -5.36207200 | -1.32687000 | 1.66936000  |
| H | -6.10461100 | -0.93542900 | 2.36080900  |
| C | -4.29584400 | -0.49613500 | 1.30872200  |
| C | -2.38219200 | -3.04024400 | -0.91695000 |
| H | -1.40463600 | -3.06490100 | -0.42645100 |
| H | -2.26607400 | -2.58568900 | -1.90508300 |
| H | -2.68471400 | -4.07817400 | -1.07844400 |
| C | -6.65070400 | -3.50386800 | 1.63076100  |
| H | -6.41958300 | -4.01018000 | 2.57716600  |
| H | -6.86820100 | -4.27972100 | 0.88978100  |
| H | -7.56098200 | -2.91653200 | 1.79081600  |
| C | -4.27818300 | 0.87877700  | 1.94718900  |
| H | -4.64024300 | 1.65899900  | 1.26974500  |
| H | -3.28016800 | 1.15089100  | 2.29196900  |
| H | -4.93308900 | 0.87644600  | 2.82331900  |
| C | -2.56026600 | 1.83670900  | -0.42425900 |
| C | -3.65944300 | 1.98010300  | -1.31505200 |
| C | -4.08570800 | 3.26778500  | -1.66068800 |
| H | -4.92362900 | 3.36561300  | -2.34719600 |
| C | -3.48398700 | 4.41832800  | -1.15442500 |
| C | -2.43088700 | 4.25245000  | -0.25410200 |
| H | -1.95927500 | 5.13397600  | 0.17282400  |
| C | -1.95121700 | 2.99636800  | 0.13211300  |
| C | -4.48050600 | 0.83783900  | -1.88141000 |
| H | -4.95019700 | 1.14769100  | -2.81979400 |
| H | -5.28153300 | 0.55592600  | -1.18762100 |
| H | -3.90879600 | -0.06657000 | -2.08273000 |
| C | -3.94187700 | 5.79375900  | -1.57300500 |
| H | -4.96745000 | 5.77693200  | -1.95501100 |
| H | -3.30010500 | 6.19288400  | -2.36937500 |
| H | -3.89835500 | 6.50109100  | -0.73802100 |
| C | -0.83993700 | 2.98691500  | 1.16039000  |
| H | -0.55486100 | 4.01377300  | 1.40317300  |
| H | 0.06172900  | 2.47782200  | 0.81401500  |
| H | -1.15061400 | 2.50422100  | 2.09245700  |
| C | 2.60820900  | 1.04190800  | 0.35550300  |
| C | 3.37509500  | 0.73886500  | 1.48732500  |
| F | 3.11386800  | -0.37490900 | 2.19777400  |

|   |             |             |             |
|---|-------------|-------------|-------------|
| C | 4.43122200  | 1.52609500  | 1.93961600  |
| F | 5.12574100  | 1.18365000  | 3.03485800  |
| C | 4.77055500  | 2.67926900  | 1.23788800  |
| F | 5.78167000  | 3.45231100  | 1.65411200  |
| C | 4.04855000  | 3.01892700  | 0.09983100  |
| F | 4.36654300  | 4.12767700  | -0.58762000 |
| C | 2.99754600  | 2.20183900  | -0.31608300 |
| F | 2.35757200  | 2.60551300  | -1.43794300 |
| C | 1.97025300  | -1.45951400 | -0.41617400 |
| C | 3.01317200  | -1.59340400 | -1.33896300 |
| F | 3.50317300  | -0.49711400 | -1.96002800 |
| C | 3.59165400  | -2.80997900 | -1.69164600 |
| F | 4.59187700  | -2.86340100 | -2.58269100 |
| C | 3.11448500  | -3.98337100 | -1.11419100 |
| F | 3.64816100  | -5.16656200 | -1.44139700 |
| C | 2.06083100  | -3.91082500 | -0.21046700 |
| F | 1.56599800  | -5.03578700 | 0.33114100  |
| C | 1.51747100  | -2.66817500 | 0.11298900  |
| F | 0.45651600  | -2.70320300 | 0.96260700  |
| H | -0.40658100 | -5.20878300 | 2.99159600  |
| H | -0.04211000 | -4.87653100 | 2.43648900  |
| C | -1.40727800 | -0.11619400 | -2.95022300 |
| H | -2.23936100 | -0.79332500 | -3.16815200 |
| H | -1.74317800 | 0.91241900  | -3.11272800 |
| H | -0.61625000 | -0.32354800 | -3.67957800 |

## TSB78

E= -2493.666824au

|   |             |             |             |
|---|-------------|-------------|-------------|
| P | 2.05313600  | 0.05866900  | 0.04241800  |
| B | -1.44693900 | -0.05219500 | 0.01117400  |
| O | -0.67007100 | -0.00743300 | -1.40546100 |
| O | 1.02942400  | -0.42695200 | -2.87065400 |
| C | 0.89892300  | -0.30074600 | 1.51905500  |
| H | 0.71251200  | -1.37933000 | 1.49521900  |
| C | -0.42022600 | 0.44941500  | 1.18779100  |
| H | -0.17721900 | 1.50903800  | 1.04845800  |
| H | -1.00421700 | 0.43540400  | 2.11434000  |
| C | 0.45155500  | -0.43729100 | -1.81202600 |
| C | 3.50680100  | -1.08954700 | -0.23143300 |
| C | 3.73693000  | -2.31603500 | 0.44776300  |
| C | 4.84340800  | -3.09519400 | 0.08833700  |
| H | 5.01359500  | -4.02537500 | 0.62577500  |
| C | 5.72565400  | -2.73274100 | -0.92879400 |

|   |             |             |             |
|---|-------------|-------------|-------------|
| C | 5.45881300  | -1.54925500 | -1.61620400 |
| H | 6.11331900  | -1.25091500 | -2.43208600 |
| C | 4.36652300  | -0.73128200 | -1.31067800 |
| C | 2.85715900  | -2.88141800 | 1.54372900  |
| H | 1.85637300  | -3.13901500 | 1.17849900  |
| H | 2.73646600  | -2.19922000 | 2.38797700  |
| H | 3.29581400  | -3.80375900 | 1.93393000  |
| C | 6.89415900  | -3.61155000 | -1.30340900 |
| H | 6.60755400  | -4.33790600 | -2.07548000 |
| H | 7.26117600  | -4.17977700 | -0.44236200 |
| H | 7.72565900  | -3.02268800 | -1.70444600 |
| C | 4.17021500  | 0.49809800  | -2.17462200 |
| H | 4.41077600  | 1.42511500  | -1.64436100 |
| H | 3.14249800  | 0.57303000  | -2.54213100 |
| H | 4.82022000  | 0.43997900  | -3.05257500 |
| C | 2.69108200  | 1.79191600  | 0.32126000  |
| C | 2.07505700  | 2.87495700  | -0.35590600 |
| C | 2.49346500  | 4.17863900  | -0.06558300 |
| H | 2.01224500  | 5.00363100  | -0.58538500 |
| C | 3.50793200  | 4.45241900  | 0.85162500  |
| C | 4.13680200  | 3.36771700  | 1.46504000  |
| H | 4.95483500  | 3.55316400  | 2.15775500  |
| C | 3.76379000  | 2.04121900  | 1.21932200  |
| C | 1.00639200  | 2.70702200  | -1.41273200 |
| H | 0.83293900  | 3.65848300  | -1.92370500 |
| H | 0.04831900  | 2.38438400  | -0.99558300 |
| H | 1.28991300  | 1.97637200  | -2.17653700 |
| C | 3.90835800  | 5.87141300  | 1.17475800  |
| H | 3.72038300  | 6.54303200  | 0.33087000  |
| H | 4.96926100  | 5.93971800  | 1.43761600  |
| H | 3.33545600  | 6.25384000  | 2.02993200  |
| C | 4.59589700  | 0.96670700  | 1.88711200  |
| H | 5.13390800  | 1.38670600  | 2.74235600  |
| H | 5.34097300  | 0.56115700  | 1.19254900  |
| H | 4.00871700  | 0.12167400  | 2.24530700  |
| C | -2.62297200 | 1.06442100  | -0.25972500 |
| C | -3.44569300 | 0.89882100  | -1.38336700 |
| F | -3.25769300 | -0.15779100 | -2.19927200 |
| C | -4.48070100 | 1.76296500  | -1.72802000 |
| F | -5.22221100 | 1.54832800  | -2.82427000 |
| C | -4.75034800 | 2.85721000  | -0.91154000 |
| F | -5.73970700 | 3.70445300  | -1.21865800 |
| C | -3.98088600 | 3.05701700  | 0.22773400  |

|   |             |             |             |
|---|-------------|-------------|-------------|
| F | -4.23409100 | 4.10336000  | 1.02872400  |
| C | -2.95026500 | 2.16665200  | 0.53427500  |
| F | -2.27696000 | 2.44609300  | 1.67188500  |
| C | -2.08436000 | -1.53717600 | 0.28016200  |
| C | -2.89013100 | -1.70716400 | 1.41363900  |
| F | -3.09762100 | -0.66701100 | 2.25213400  |
| C | -3.52136300 | -2.90079500 | 1.75153800  |
| F | -4.27504500 | -2.99011200 | 2.85575600  |
| C | -3.36523100 | -4.01077100 | 0.92622200  |
| F | -3.95691400 | -5.17090900 | 1.23176100  |
| C | -2.58162900 | -3.89802100 | -0.21614200 |
| F | -2.41619300 | -4.95707500 | -1.02066900 |
| C | -1.97250600 | -2.67903500 | -0.51403900 |
| F | -1.22597000 | -2.67085900 | -1.64746800 |
| H | 0.62285000  | -1.61436100 | -1.25183800 |
| H | 1.12708700  | -1.02465100 | -0.79578000 |
| C | 1.39173300  | 0.09763300  | 2.91765300  |
| H | 2.27011200  | -0.45958200 | 3.25381700  |
| H | 1.62934500  | 1.16530800  | 2.96011600  |
| H | 0.58758400  | -0.09103100 | 3.63846900  |

## B8

E= -2493.822617au

|   |             |             |             |
|---|-------------|-------------|-------------|
| P | -2.04989900 | 0.35752700  | -0.16609400 |
| B | 1.49521700  | 0.20925300  | -0.02731400 |
| O | 0.65982300  | 0.28693700  | 1.24606400  |
| O | 0.23089900  | -0.08170500 | 3.40068200  |
| C | -0.79422100 | 0.02238700  | -1.54294800 |
| H | -0.61138200 | -1.05332500 | -1.49564400 |
| C | 0.52528500  | 0.78541500  | -1.23451800 |
| H | 0.28746400  | 1.84385900  | -1.11101900 |
| H | 1.10583600  | 0.74136300  | -2.16786600 |
| C | 0.96976500  | -0.18618100 | 2.44066400  |
| C | -2.95504700 | -1.05593600 | 0.59515600  |
| C | -3.17680700 | -2.31091800 | -0.02029600 |
| C | -3.89112700 | -3.28567100 | 0.68591600  |
| H | -4.06354900 | -4.24611800 | 0.20596600  |
| C | -4.37312700 | -3.07681600 | 1.97722200  |
| C | -4.12161700 | -1.83927300 | 2.57310600  |
| H | -4.47442200 | -1.65503300 | 3.58502200  |
| C | -3.41597100 | -0.82471100 | 1.92314900  |
| C | -2.64927100 | -2.72285200 | -1.37645500 |
| H | -1.63384400 | -3.12441100 | -1.27583300 |

|   |             |             |             |
|---|-------------|-------------|-------------|
| H | -2.62054100 | -1.91384600 | -2.10709200 |
| H | -3.26982900 | -3.51979100 | -1.79652800 |
| C | -5.11251700 | -4.16045200 | 2.72296700  |
| H | -4.44356100 | -4.67304100 | 3.42633000  |
| H | -5.51450400 | -4.91606900 | 2.04094200  |
| H | -5.94256700 | -3.74918100 | 3.30766800  |
| C | -3.13980100 | 0.44427700  | 2.70050700  |
| H | -3.42144000 | 1.34978900  | 2.15256500  |
| H | -2.07552900 | 0.50613100  | 2.97025800  |
| H | -3.71057500 | 0.44081600  | 3.63319900  |
| C | -3.15341200 | 1.77908100  | -0.55836600 |
| C | -4.36077100 | 1.60570800  | -1.28188400 |
| C | -5.13296300 | 2.73018200  | -1.58613700 |
| H | -6.05333000 | 2.59114500  | -2.14851800 |
| C | -4.76386400 | 4.01750300  | -1.19202100 |
| C | -3.58303000 | 4.16233400  | -0.46209800 |
| H | -3.28202400 | 5.15546100  | -0.13785800 |
| C | -2.76426000 | 3.07844700  | -0.12540400 |
| C | -4.89168500 | 0.25781300  | -1.71811900 |
| H | -5.73163600 | 0.38806000  | -2.40625200 |
| H | -5.24775800 | -0.32894100 | -0.86441100 |
| H | -4.14299500 | -0.34827200 | -2.23501500 |
| C | -5.62980200 | 5.21063600  | -1.51522300 |
| H | -6.21094400 | 5.04852500  | -2.42866000 |
| H | -5.02972800 | 6.11686500  | -1.64657800 |
| H | -6.34329100 | 5.40707100  | -0.70397500 |
| C | -1.53113300 | 3.37858700  | 0.70614300  |
| H | -1.50344500 | 4.44432700  | 0.94833800  |
| H | -0.59202300 | 3.14252000  | 0.19840700  |
| H | -1.52810900 | 2.83277700  | 1.65648500  |
| C | 2.84676700  | 1.13469400  | 0.24269800  |
| C | 3.98763600  | 0.60869200  | 0.86023600  |
| F | 4.02905700  | -0.69815700 | 1.21671300  |
| C | 5.12804100  | 1.34460300  | 1.17084500  |
| F | 6.18445200  | 0.76126200  | 1.75603300  |
| C | 5.16300600  | 2.70292600  | 0.87476400  |
| F | 6.24616400  | 3.43493800  | 1.16349000  |
| C | 4.05028500  | 3.28946600  | 0.28531700  |
| F | 4.05510400  | 4.60288600  | 0.00710700  |
| C | 2.93217500  | 2.50767700  | -0.00463400 |
| F | 1.89543500  | 3.19312300  | -0.55194100 |
| C | 1.86102400  | -1.35234000 | -0.45099900 |
| C | 2.87850700  | -1.64296600 | -1.36648000 |

|   |             |             |             |
|---|-------------|-------------|-------------|
| F | 3.64939000  | -0.64749400 | -1.85656200 |
| C | 3.16036200  | -2.92035600 | -1.84393100 |
| F | 4.16065200  | -3.12332700 | -2.71391300 |
| C | 2.37899300  | -3.99480300 | -1.42750800 |
| F | 2.61623100  | -5.22916000 | -1.89027200 |
| C | 1.33517600  | -3.76008600 | -0.54156800 |
| F | 0.52720900  | -4.76831600 | -0.16821200 |
| C | 1.10552400  | -2.46460300 | -0.07906000 |
| F | 0.03380800  | -2.32983900 | 0.74817600  |
| H | -1.24163700 | 0.80911600  | 0.88292000  |
| H | 1.95247600  | -0.68296700 | 2.50180200  |
| C | -1.33682900 | 0.39048200  | -2.93492300 |
| H | -2.24614400 | -0.15015800 | -3.21726100 |
| H | -1.54446800 | 1.46257300  | -3.00816600 |
| H | -0.56912500 | 0.14882200  | -3.67750400 |

### TSB8

E= -2493.791851au

|   |             |             |             |
|---|-------------|-------------|-------------|
| P | 1.96321300  | -0.35459500 | -0.01745000 |
| B | -1.67145700 | -0.15167000 | -0.39343200 |
| O | -0.65550700 | -0.29270700 | 1.54902800  |
| O | 0.17166400  | 0.22024400  | 3.59120900  |
| C | 0.84360600  | -0.09765000 | -1.56120100 |
| H | 0.67414000  | 0.97820900  | -1.62439000 |
| C | -0.51363700 | -0.80192000 | -1.27492000 |
| H | -0.33328200 | -1.84575800 | -0.99922300 |
| H | -1.02913900 | -0.88795300 | -2.24975000 |
| C | -0.75370500 | 0.15071400  | 2.82251200  |
| C | 3.17223900  | 1.02696800  | 0.34680200  |
| C | 3.39016900  | 2.22300100  | -0.38575200 |
| C | 4.30886100  | 3.16395300  | 0.09286600  |
| H | 4.46472000  | 4.07179000  | -0.48692700 |
| C | 5.02619200  | 2.98588100  | 1.27647500  |
| C | 4.77943100  | 1.82337900  | 2.00275200  |
| H | 5.30442900  | 1.66346400  | 2.94190500  |
| C | 3.86165600  | 0.85400900  | 1.58021700  |
| C | 2.66707300  | 2.59497100  | -1.66214100 |
| H | 1.63187200  | 2.88970900  | -1.45522500 |
| H | 2.64540000  | 1.78744700  | -2.39675600 |
| H | 3.15448300  | 3.45266300  | -2.13524600 |
| C | 6.01827700  | 4.02119500  | 1.75038300  |
| H | 6.83899500  | 4.14674600  | 1.03268700  |
| H | 6.45708900  | 3.74204300  | 2.71339500  |

|   |             |             |             |
|---|-------------|-------------|-------------|
| H | 5.54428500  | 5.00325400  | 1.86997700  |
| C | 3.63411900  | -0.32643800 | 2.50288000  |
| H | 3.86603300  | -1.28572700 | 2.02818200  |
| H | 2.59290700  | -0.36232600 | 2.84622200  |
| H | 4.26897900  | -0.23636800 | 3.38961300  |
| C | 2.97417500  | -1.88748100 | -0.38691700 |
| C | 4.16104500  | -1.90575400 | -1.16775400 |
| C | 4.80333800  | -3.12617600 | -1.40849700 |
| H | 5.70408100  | -3.12550700 | -2.01936400 |
| C | 4.33521800  | -4.33600500 | -0.89399400 |
| C | 3.19092700  | -4.29859100 | -0.09815900 |
| H | 2.81579700  | -5.22453000 | 0.33244300  |
| C | 2.50960800  | -3.10674000 | 0.17776800  |
| C | 4.82732900  | -0.66820000 | -1.72965100 |
| H | 5.56203100  | -0.94853800 | -2.49106300 |
| H | 5.35382900  | -0.11329900 | -0.94542100 |
| H | 4.12405000  | 0.02906700  | -2.18627700 |
| C | 5.06552100  | -5.63104800 | -1.15912800 |
| H | 5.92419900  | -5.74631300 | -0.48424400 |
| H | 5.45308500  | -5.66995400 | -2.18322200 |
| H | 4.41297300  | -6.49719800 | -1.00904600 |
| C | 1.32202800  | -3.19848700 | 1.11798600  |
| H | 1.21029900  | -4.22575900 | 1.47845600  |
| H | 0.37529100  | -2.91585500 | 0.64813400  |
| H | 1.45052200  | -2.55122100 | 1.99234100  |
| C | -2.91711700 | -1.05919800 | 0.03165100  |
| C | -3.81844200 | -0.64077200 | 1.02005600  |
| F | -3.62817100 | 0.53951000  | 1.65064600  |
| C | -4.91965000 | -1.38154900 | 1.43290500  |
| F | -5.73023700 | -0.92818300 | 2.39629100  |
| C | -5.17713700 | -2.60889800 | 0.82688400  |
| F | -6.23137200 | -3.33590100 | 1.20149200  |
| C | -4.32425800 | -3.06886700 | -0.17015800 |
| F | -4.56521900 | -4.24351600 | -0.76443800 |
| C | -3.22248200 | -2.29982900 | -0.54308800 |
| F | -2.46073300 | -2.81606500 | -1.52624900 |
| C | -1.94682100 | 1.42098900  | -0.54098600 |
| C | -3.08384600 | 1.85318500  | -1.23581300 |
| F | -3.95175400 | 0.94955600  | -1.73436000 |
| C | -3.37644600 | 3.19230200  | -1.47952000 |
| F | -4.47728300 | 3.53905400  | -2.15637100 |
| C | -2.50635700 | 4.17504900  | -1.01630200 |
| F | -2.76486500 | 5.46542800  | -1.24130900 |

|   |             |             |             |
|---|-------------|-------------|-------------|
| C | -1.35770800 | 3.79786100  | -0.32744200 |
| F | -0.49867100 | 4.72956100  | 0.10382400  |
| C | -1.10184000 | 2.44611300  | -0.10890400 |
| F | 0.03886600  | 2.16350300  | 0.55713500  |
| H | 0.33202600  | -0.40279500 | 1.27781200  |
| H | -1.79102100 | 0.42001800  | 3.05675500  |
| C | 1.39781200  | -0.59717000 | -2.90521000 |
| H | 2.33166400  | -0.10878200 | -3.19334500 |
| H | 1.58255900  | -1.67587200 | -2.87977800 |
| H | 0.66740500  | -0.40296600 | -3.70116900 |

## C<sub>5</sub>

E= -2684.3457682au

|   |           |           |           |
|---|-----------|-----------|-----------|
| C | -0.617427 | 3.026240  | 0.438339  |
| C | -0.724119 | 1.955174  | -0.486440 |
| C | -0.418137 | 2.201009  | -1.854242 |
| C | -0.044207 | 3.487741  | -2.255552 |
| C | 0.063638  | 4.551931  | -1.360035 |
| C | -0.229181 | 4.291025  | -0.022663 |
| P | -1.144145 | 0.180149  | -0.052174 |
| C | 3.387871  | 3.054130  | -2.798439 |
| O | 3.567068  | 4.094958  | -2.294594 |
| C | -0.485683 | 1.142126  | -2.932115 |
| C | 0.506103  | 5.919686  | -1.819053 |
| C | -0.912559 | 2.925490  | 1.919208  |
| C | -1.571744 | -0.277029 | 1.773664  |
| C | -0.734517 | -1.577743 | 1.705665  |
| B | 0.485126  | -1.142386 | 0.717761  |
| O | 3.212890  | 2.026790  | -3.327308 |
| C | 1.540091  | -0.030816 | 1.282806  |
| C | 2.365600  | 0.699901  | 0.418159  |
| C | 3.361184  | 1.573262  | 0.842407  |
| C | 3.575633  | 1.757038  | 2.204673  |
| C | 2.784272  | 1.060740  | 3.111480  |
| C | 1.797098  | 0.192997  | 2.642403  |
| F | 2.213623  | 0.576961  | -0.914404 |
| F | 1.078451  | -0.430448 | 3.599167  |
| F | 2.975657  | 1.225293  | 4.427480  |
| F | 4.526119  | 2.591694  | 2.635002  |
| F | 4.114032  | 2.239249  | -0.048364 |
| C | 1.281465  | -2.326819 | -0.056136 |
| C | 1.677889  | -2.410067 | -1.392246 |
| C | 2.424841  | -3.463751 | -1.917563 |

|   |           |           |           |
|---|-----------|-----------|-----------|
| C | 2.836779  | -4.497475 | -1.084640 |
| C | 2.487145  | -4.459165 | 0.261213  |
| C | 1.732249  | -3.391149 | 0.739084  |
| F | 1.319586  | -1.463427 | -2.287893 |
| F | 2.747556  | -3.485328 | -3.218106 |
| F | 3.557717  | -5.513937 | -1.570016 |
| F | 2.881502  | -5.440672 | 1.083514  |
| F | 1.456341  | -3.407377 | 2.060544  |
| C | -2.676886 | -0.231209 | -1.055367 |
| C | -3.787584 | 0.657538  | -1.040379 |
| C | -4.925515 | 0.338463  | -1.790397 |
| C | -5.024525 | -0.827002 | -2.549295 |
| C | -3.937945 | -1.700360 | -2.528449 |
| C | -2.769778 | -1.431837 | -1.804998 |
| C | -3.842731 | 1.946967  | -0.250813 |
| C | -6.255768 | -1.125217 | -3.370329 |
| C | -1.667452 | -2.461434 | -1.887567 |
| H | -0.454217 | -1.927728 | 2.701022  |
| H | -1.018122 | 0.424733  | 2.394271  |
| H | 0.167482  | 3.656051  | -3.309695 |
| H | -0.157589 | 5.101830  | 0.698679  |
| H | -3.992381 | -2.627092 | -3.095196 |
| H | -5.767440 | 1.026947  | -1.765776 |
| H | 0.047705  | 1.482445  | -3.824419 |
| H | -0.018566 | 0.208503  | -2.616956 |
| H | -1.519040 | 0.921501  | -3.221339 |
| H | -1.897014 | 2.496290  | 2.121418  |
| H | -0.167400 | 2.320892  | 2.447490  |
| H | -0.893772 | 3.921364  | 2.371138  |
| H | 1.593455  | 5.944687  | -1.962824 |
| H | 0.044210  | 6.189157  | -2.775652 |
| H | 0.248912  | 6.691616  | -1.086813 |
| H | -2.015772 | -3.342576 | -2.434546 |
| H | -0.792706 | -2.071479 | -2.411813 |
| H | -1.330871 | -2.798740 | -0.904178 |
| H | -6.180511 | -0.676331 | -4.369817 |
| H | -6.395100 | -2.202571 | -3.507647 |
| H | -7.158675 | -0.720560 | -2.900771 |
| H | -3.235814 | 2.734455  | -0.707955 |
| H | -4.874661 | 2.306815  | -0.201192 |
| H | -3.498170 | 1.815702  | 0.777805  |
| H | -1.327119 | -2.379542 | 1.246797  |
| C | -2.983508 | -0.371944 | 2.297499  |

|   |           |           |          |
|---|-----------|-----------|----------|
| C | -3.912876 | -1.295551 | 1.791478 |
| C | -3.378897 | 0.431047  | 3.380671 |
| C | -5.193476 | -1.395486 | 2.334765 |
| H | -3.636660 | -1.943979 | 0.966825 |
| C | -4.659185 | 0.332297  | 3.927703 |
| H | -2.667048 | 1.127245  | 3.817371 |
| C | -5.574818 | -0.579880 | 3.402411 |
| H | -5.894334 | -2.117260 | 1.923582 |
| H | -4.935105 | 0.962166  | 4.769359 |
| H | -6.572087 | -0.662120 | 3.826085 |

### TSc<sub>56</sub>

E= -2684.3224687au

|   |           |           |           |
|---|-----------|-----------|-----------|
| C | -3.281287 | 2.405352  | -0.344252 |
| C | -3.083238 | 1.137483  | -0.946711 |
| C | -3.841340 | 0.818895  | -2.111704 |
| C | -4.781353 | 1.735874  | -2.595030 |
| C | -4.999748 | 2.975987  | -1.998039 |
| C | -4.232420 | 3.284231  | -0.876746 |
| P | -1.772358 | -0.128674 | -0.496573 |
| C | 0.029552  | 0.282065  | -2.385776 |
| O | -0.620935 | 0.642417  | -3.296433 |
| C | -3.714745 | -0.477856 | -2.884757 |
| C | -5.997606 | 3.956925  | -2.565486 |
| C | -2.522388 | 2.894948  | 0.865101  |
| C | -0.719940 | 0.145561  | 1.112098  |
| C | 0.587146  | -0.677224 | 0.890116  |
| B | 1.794716  | -0.091743 | 0.028993  |
| O | 1.054575  | -0.011159 | -1.832659 |
| C | 2.209467  | 1.443366  | 0.292195  |
| C | 1.510956  | 2.576781  | -0.126877 |
| C | 1.893257  | 3.880796  | 0.176692  |
| C | 3.030901  | 4.096497  | 0.947512  |
| C | 3.757404  | 3.001789  | 1.406527  |
| C | 3.338700  | 1.715610  | 1.074817  |
| F | 0.373072  | 2.459545  | -0.856832 |
| F | 4.071477  | 0.700958  | 1.575295  |
| F | 4.844502  | 3.191411  | 2.163122  |
| F | 3.411486  | 5.338717  | 1.256797  |
| F | 1.165793  | 4.919479  | -0.253133 |
| C | 2.995685  | -1.071956 | -0.378814 |
| C | 3.926528  | -0.694692 | -1.357006 |
| C | 4.987968  | -1.498626 | -1.759769 |

|   |           |           |           |
|---|-----------|-----------|-----------|
| C | 5.165079  | -2.743465 | -1.161219 |
| C | 4.277337  | -3.160156 | -0.175574 |
| C | 3.219916  | -2.329282 | 0.191952  |
| F | 3.814585  | 0.498721  | -1.967503 |
| F | 5.838491  | -1.087818 | -2.708831 |
| F | 6.179243  | -3.529874 | -1.530982 |
| F | 4.442287  | -4.352776 | 0.411639  |
| F | 2.413947  | -2.803579 | 1.162919  |
| C | -2.694203 | -1.728516 | -0.203711 |
| C | -3.882632 | -1.799194 | 0.568009  |
| C | -4.505302 | -3.042418 | 0.745820  |
| C | -4.003105 | -4.219837 | 0.194347  |
| C | -2.839593 | -4.130456 | -0.573881 |
| C | -2.183564 | -2.915842 | -0.796941 |
| C | -4.549001 | -0.602623 | 1.211448  |
| C | -4.693882 | -5.546370 | 0.403939  |
| C | -0.981576 | -2.945349 | -1.721012 |
| H | 1.049230  | -0.796206 | 1.883700  |
| H | -0.471593 | 1.206552  | 1.087941  |
| H | -5.354940 | 1.464989  | -3.479142 |
| H | -4.371813 | 4.246778  | -0.389248 |
| H | -2.432735 | -5.032662 | -1.025937 |
| H | -5.411593 | -3.085353 | 1.346105  |
| H | -4.203093 | -0.376848 | -3.858723 |
| H | -2.671418 | -0.743635 | -3.072749 |
| H | -4.183061 | -1.318812 | -2.363121 |
| H | -2.575258 | 2.187657  | 1.694686  |
| H | -1.468082 | 3.074938  | 0.630155  |
| H | -2.940151 | 3.843213  | 1.216175  |
| H | -5.547498 | 4.561193  | -3.364481 |
| H | -6.863667 | 3.443523  | -2.997343 |
| H | -6.359991 | 4.649366  | -1.798419 |
| H | -0.718494 | -3.979470 | -1.963218 |
| H | -1.197690 | -2.434165 | -2.667483 |
| H | -0.094300 | -2.470201 | -1.298161 |
| H | -5.111104 | -5.929429 | -0.536185 |
| H | -3.995813 | -6.305289 | 0.777077  |
| H | -5.515607 | -5.461178 | 1.121724  |
| H | -5.108116 | -0.012433 | 0.477089  |
| H | -5.254327 | -0.935186 | 1.979350  |
| H | -3.832766 | 0.066694  | 1.691791  |
| H | 0.337630  | -1.702518 | 0.602892  |
| C | -1.293953 | -0.172015 | 2.486571  |

|   |           |           |          |
|---|-----------|-----------|----------|
| C | -1.620153 | -1.483416 | 2.873851 |
| C | -1.372609 | 0.835075  | 3.462777 |
| C | -2.055529 | -1.762489 | 4.169160 |
| H | -1.528659 | -2.295512 | 2.161832 |
| C | -1.805431 | 0.557825  | 4.761385 |
| H | -1.065988 | 1.847435  | 3.214106 |
| C | -2.159322 | -0.742954 | 5.117920 |
| H | -2.306731 | -2.784962 | 4.438916 |
| H | -1.853361 | 1.359275  | 5.493961 |
| H | -2.496150 | -0.963987 | 6.127069 |

## C<sub>6</sub>

E= -2684.3337121au

|   |           |           |           |
|---|-----------|-----------|-----------|
| P | 1.809161  | -0.160522 | -0.004016 |
| B | -1.585826 | -0.285802 | 0.020611  |
| O | -0.654313 | -0.246613 | -1.226983 |
| O | 0.982644  | -1.274441 | -2.357836 |
| C | 0.713376  | 0.433968  | 1.454885  |
| H | 1.223740  | 0.062392  | 2.343065  |
| C | -0.709058 | -0.205527 | 1.422894  |
| H | -1.282284 | 0.354242  | 2.168276  |
| H | -0.622233 | -1.210000 | 1.842498  |
| C | 0.548031  | -0.667037 | -1.405783 |
| C | 2.898191  | -1.662363 | 0.238670  |
| C | 2.827045  | -2.523420 | 1.370379  |
| C | 3.654664  | -3.649612 | 1.419511  |
| H | 3.579344  | -4.301772 | 2.286293  |
| C | 4.558524  | -3.970919 | 0.408515  |
| C | 4.622153  | -3.111081 | -0.683451 |
| H | 5.314997  | -3.335022 | -1.490610 |
| C | 3.825361  | -1.965170 | -0.802572 |
| C | 1.938632  | -2.325927 | 2.579130  |
| H | 1.986514  | -3.210881 | 3.218828  |
| H | 0.892853  | -2.183157 | 2.311583  |
| H | 2.262442  | -1.477275 | 3.194139  |
| C | 5.439388  | -5.191919 | 0.506571  |
| H | 4.875848  | -6.061718 | 0.861845  |
| H | 6.262390  | -5.028594 | 1.214714  |
| H | 5.881668  | -5.444913 | -0.461742 |
| C | 4.067104  | -1.137559 | -2.049727 |
| H | 3.138220  | -0.839427 | -2.533142 |
| H | 4.631081  | -1.733435 | -2.773006 |
| H | 4.657092  | -0.241438 | -1.831310 |

|   |           |           |           |
|---|-----------|-----------|-----------|
| C | 2.914122  | 1.254413  | -0.476272 |
| C | 3.981737  | 1.555101  | 0.413352  |
| C | 4.839922  | 2.614609  | 0.107293  |
| H | 5.653020  | 2.836313  | 0.794732  |
| C | 4.684631  | 3.395271  | -1.038230 |
| C | 3.624728  | 3.087524  | -1.889336 |
| H | 3.480474  | 3.684803  | -2.786134 |
| C | 2.727252  | 2.040893  | -1.643708 |
| C | 4.280034  | 0.790200  | 1.687161  |
| H | 3.384638  | 0.581514  | 2.278696  |
| H | 4.949096  | 1.377998  | 2.322101  |
| H | 4.769958  | -0.167589 | 1.483411  |
| C | 5.608714  | 4.553321  | -1.325294 |
| H | 5.660981  | 4.768178  | -2.397396 |
| H | 6.623840  | 4.355280  | -0.965265 |
| H | 5.258147  | 5.465869  | -0.825243 |
| C | 1.644465  | 1.832478  | -2.680808 |
| H | 1.805046  | 0.919869  | -3.263129 |
| H | 1.644004  | 2.671413  | -3.381854 |
| H | 0.639384  | 1.771034  | -2.259188 |
| C | -2.626659 | 0.976552  | -0.106797 |
| C | -2.680293 | 1.929527  | -1.124549 |
| F | -1.808080 | 1.904687  | -2.161633 |
| C | -3.580877 | 2.996376  | -1.140868 |
| F | -3.559606 | 3.889050  | -2.144043 |
| C | -4.499232 | 3.138028  | -0.108785 |
| F | -5.371071 | 4.154840  | -0.108049 |
| C | -4.494403 | 2.211597  | 0.930390  |
| F | -5.374930 | 2.328425  | 1.935549  |
| C | -3.574262 | 1.170530  | 0.903732  |
| F | -3.637566 | 0.289819  | 1.929851  |
| C | -2.323640 | -1.764404 | -0.115168 |
| C | -3.676406 | -2.019315 | -0.362391 |
| F | -4.566799 | -1.019202 | -0.510792 |
| C | -4.212015 | -3.303317 | -0.483309 |
| F | -5.522206 | -3.473395 | -0.710860 |
| C | -3.383783 | -4.413615 | -0.375793 |
| F | -3.883871 | -5.649749 | -0.491474 |
| C | -2.024787 | -4.220610 | -0.150443 |
| F | -1.200843 | -5.275108 | -0.051650 |
| C | -1.543131 | -2.921934 | -0.032872 |
| F | -0.197261 | -2.817170 | 0.166245  |
| C | 0.709614  | 1.951333  | 1.584225  |

|   |           |          |           |
|---|-----------|----------|-----------|
| C | 1.205465  | 2.521491 | 2.766458  |
| C | 0.166783  | 2.805407 | 0.614261  |
| C | 1.162978  | 3.900699 | 2.976681  |
| H | 1.613866  | 1.878124 | 3.542796  |
| C | 0.126647  | 4.184240 | 0.819408  |
| H | -0.238414 | 2.399847 | -0.303510 |
| C | 0.624031  | 4.738565 | 2.000455  |
| H | 1.545965  | 4.315947 | 3.905042  |
| H | -0.302741 | 4.824933 | 0.054134  |
| H | 0.585947  | 5.812607 | 2.159906  |

## C7

E= -2685.52347au

|   |             |             |             |
|---|-------------|-------------|-------------|
| P | -1.74276200 | -0.05204400 | -0.41406000 |
| B | 1.55649000  | -0.08977300 | -0.16268000 |
| O | 0.82908200  | 0.06087200  | -1.52391600 |
| O | -0.88069900 | 0.08979100  | -2.96218000 |
| C | -0.73563800 | 0.25639800  | 1.18304600  |
| H | -0.43049800 | 1.30221800  | 1.12559000  |
| C | 0.52288000  | -0.63042100 | 0.97736300  |
| H | 0.21926000  | -1.67051100 | 0.81890000  |
| H | 1.04785700  | -0.64098700 | 1.93843300  |
| C | -0.41073500 | 0.02915000  | -1.84582300 |
| C | -3.02353300 | 1.14525300  | -1.04837900 |
| C | -3.04758000 | 2.50627600  | -0.64735100 |
| C | -4.04911500 | 3.34579800  | -1.14619400 |
| H | -4.05823900 | 4.38354900  | -0.82222900 |
| C | -5.01393600 | 2.90862600  | -2.05080500 |
| C | -4.93125800 | 1.58639000  | -2.48420200 |
| H | -5.64320000 | 1.22959000  | -3.22481900 |
| C | -3.95598400 | 0.69244200  | -2.02792600 |
| C | -2.02791000 | 3.15201000  | 0.26265200  |
| H | -1.00986600 | 3.02080800  | -0.11441400 |
| H | -2.08152400 | 2.76499400  | 1.28228800  |
| H | -2.20960100 | 4.22862300  | 0.31829100  |
| C | -6.06796200 | 3.84469800  | -2.58908800 |
| H | -5.73541200 | 4.30888600  | -3.52686900 |
| H | -6.28428200 | 4.65297300  | -1.88323400 |
| H | -7.00263400 | 3.31541900  | -2.80223300 |
| C | -3.97889300 | -0.68359600 | -2.66519700 |
| H | -4.44735000 | -1.43819700 | -2.02577400 |
| H | -2.97602000 | -1.02148700 | -2.92675300 |
| H | -4.55622100 | -0.63626500 | -3.59310800 |

|   |             |             |             |
|---|-------------|-------------|-------------|
| C | -2.52151000 | -1.71813600 | -0.21055300 |
| C | -3.71120500 | -1.79774400 | 0.56381100  |
| C | -4.28538000 | -3.05446000 | 0.78689500  |
| H | -5.19343600 | -3.10702100 | 1.38310600  |
| C | -3.73706800 | -4.23069700 | 0.27828300  |
| C | -2.57772300 | -4.12438400 | -0.49203700 |
| H | -2.14003900 | -5.02643100 | -0.91231000 |
| C | -1.95230500 | -2.90170000 | -0.75821700 |
| C | -4.45639300 | -0.60945000 | 1.13950100  |
| H | -5.05056400 | -0.93026200 | 1.99985800  |
| H | -5.14272400 | -0.18030900 | 0.39998100  |
| H | -3.80463800 | 0.19433900  | 1.48367200  |
| C | -4.35961400 | -5.57524700 | 0.56452100  |
| H | -5.41340500 | -5.47853000 | 0.84390300  |
| H | -3.84334700 | -6.07645400 | 1.39382400  |
| H | -4.29460900 | -6.23920500 | -0.30409400 |
| C | -0.73844000 | -2.94886300 | -1.66272700 |
| H | -0.48114200 | -3.98890200 | -1.87929700 |
| H | 0.14771600  | -2.48520600 | -1.22451700 |
| H | -0.92643700 | -2.45060300 | -2.61923300 |
| C | 2.79848800  | -1.10610800 | -0.51747100 |
| C | 3.67422400  | -0.77620000 | -1.55937400 |
| F | 3.50017200  | 0.36888000  | -2.24665000 |
| C | 4.75388300  | -1.56780400 | -1.94283900 |
| F | 5.55527900  | -1.19761200 | -2.95269200 |
| C | 5.00411900  | -2.75509500 | -1.26083700 |
| F | 6.03567400  | -3.53329800 | -1.61203100 |
| C | 4.17094900  | -3.12391700 | -0.21135700 |
| F | 4.40132900  | -4.26621800 | 0.45567400  |
| C | 3.09977300  | -2.30128100 | 0.13705200  |
| F | 2.34504300  | -2.73924600 | 1.17167700  |
| C | 2.16270300  | 1.37999700  | 0.27706600  |
| C | 3.07581800  | 1.44913200  | 1.33508400  |
| F | 3.41886500  | 0.32190500  | 1.99796000  |
| C | 3.66867100  | 2.62837700  | 1.77836300  |
| F | 4.53869500  | 2.62061000  | 2.79822600  |
| C | 3.34525600  | 3.82907100  | 1.15243100  |
| F | 3.89570800  | 4.97802100  | 1.56328200  |
| C | 2.42798700  | 3.82076000  | 0.10813600  |
| F | 2.08555600  | 4.97401900  | -0.48888900 |
| C | 1.86458500  | 2.61310200  | -0.30292000 |
| F | 0.95017100  | 2.71030700  | -1.30226600 |
| H | 0.42702600  | 5.30250000  | -3.33210600 |

|   |             |             |             |
|---|-------------|-------------|-------------|
| H | 0.71195100  | 4.93763700  | -2.75151600 |
| C | -1.41657600 | 0.02030800  | 2.52232900  |
| C | -1.70403900 | 1.10052200  | 3.37140900  |
| C | -1.66584400 | -1.27697700 | 3.00150400  |
| C | -2.26009700 | 0.90039800  | 4.63645200  |
| H | -1.45892800 | 2.11185000  | 3.06084600  |
| C | -2.22386000 | -1.47930700 | 4.26349600  |
| H | -1.40919400 | -2.13690800 | 2.39360600  |
| C | -2.53237200 | -0.39209800 | 5.08402000  |
| H | -2.46543100 | 1.75593000  | 5.27406900  |
| H | -2.40610700 | -2.49276400 | 4.61079200  |
| H | -2.96165900 | -0.55266100 | 6.06909200  |

## TSC78

E= -2685.395691au

|   |             |             |             |
|---|-------------|-------------|-------------|
| P | 1.88713100  | -0.05125600 | -0.40036600 |
| B | -1.61921700 | -0.05031900 | -0.23589900 |
| O | -0.91624100 | -0.05906300 | -1.69127800 |
| O | 0.68199700  | -0.57134700 | -3.23609200 |
| C | 0.80075900  | -0.33901900 | 1.17105900  |
| H | 0.58475100  | -1.41238400 | 1.15349300  |
| C | -0.51550700 | 0.44391600  | 0.87379800  |
| H | -0.24791600 | 1.48952400  | 0.68838400  |
| H | -1.04836500 | 0.47565200  | 1.82832900  |
| C | 0.16567200  | -0.54573800 | -2.14451800 |
| C | 3.29688700  | -1.23350500 | -0.78849000 |
| C | 3.58624000  | -2.43287600 | -0.08781600 |
| C | 4.59977700  | -3.27600400 | -0.55830500 |
| H | 4.81127700  | -4.18583800 | -0.00105600 |
| C | 5.34264400  | -2.99456900 | -1.70349300 |
| C | 5.03518100  | -1.82150900 | -2.39133400 |
| H | 5.59035900  | -1.57617400 | -3.29387300 |
| C | 4.02714500  | -0.94351800 | -1.97905700 |
| C | 2.87671900  | -2.87579000 | 1.16941500  |
| H | 1.82786200  | -3.13802800 | 0.98585200  |
| H | 2.89729500  | -2.10806700 | 1.94533600  |
| H | 3.35743600  | -3.76879200 | 1.57880200  |
| C | 6.41098900  | -3.93824900 | -2.19955000 |
| H | 5.99214700  | -4.67190400 | -2.90111000 |
| H | 6.86553500  | -4.49844300 | -1.37580400 |
| H | 7.20586400  | -3.40132600 | -2.72769500 |
| C | 3.80046500  | 0.27778200  | -2.84685200 |
| H | 4.16523200  | 1.19504300  | -2.37369600 |



H 2.74455600 0.41444200 -3.09245200  
H 4.33410900 0.15901000 -3.79432800  
C 2.61626400 1.66232200 -0.28200200  
C 2.02013000 2.74144100 -0.97932400  
C 2.57672700 4.01987300 -0.84326700  
H 2.10962200 4.84573900 -1.37400800  
C 3.70764300 4.26536100 -0.06596800  
C 4.29460200 3.17953100 0.58854500  
H 5.18280900 3.34343200 1.19515300  
C 3.78350600 1.88109700 0.50117500  
C 0.82805900 2.59575700 -1.89750600  
H 0.60292000 3.55300400 -2.37621300  
H -0.07489200 2.27576400 -1.37163700  
H 1.00906400 1.86845700 -2.69590200  
C 4.29142100 5.65203700 0.05848300  
H 3.68265100 6.39204900 -0.46946000  
H 5.30593500 5.69341300 -0.35722600  
H 4.36215000 5.96026700 1.10858600  
C 4.53709500 0.79440100 1.23688400  
H 5.18500600 1.24089200 1.99686100  
H 5.16984600 0.21680800 0.55422400  
H 3.87374200 0.09252300 1.74568800  
C -2.76001000 1.11349000 -0.46146400  
C -3.64782400 0.96403600 -1.53703100  
F -3.54753300 -0.11339700 -2.34126800  
C -4.66301100 1.86497400 -1.84420400  
F -5.46926400 1.66296600 -2.89625100  
C -4.84407900 2.98321200 -1.03591000  
F -5.81243900 3.86606900 -1.30732500  
C -4.00775900 3.16951400 0.05743800  
F -4.17517100 4.23889800 0.85043600  
C -2.99967700 2.24203300 0.32741000  
F -2.25732500 2.51426000 1.42279300  
C -2.29802800 -1.50312500 0.09479800  
C -3.03533700 -1.62807100 1.27978300  
F -3.14498800 -0.57272200 2.11668100  
C -3.69452000 -2.79029000 1.67012900  
F -4.37850900 -2.83756600 2.82118500  
C -3.64104700 -3.91242200 0.84827000  
F -4.26139400 -5.04286700 1.20402700  
C -2.92920600 -3.84356600 -0.34354400  
F -2.86230500 -4.91530000 -1.14557400  
C -2.28849300 -2.65510600 -0.69339500

F -1.61645000 -2.68971100 -1.87211400  
H 0.27194700 -1.72240700 -1.61097900  
H 0.88370700 -1.18800400 -1.14673400  
C 1.31453400 0.01761100 2.55809700  
C 1.36166400 -0.96402500 3.56130400  
C 1.60504200 1.34332600 2.92308800  
C 1.72822600 -0.64634300 4.87083200  
H 1.08296800 -1.98731500 3.32372900  
C 1.97704800 1.66164200 4.22880300  
H 1.52982400 2.13548000 2.18712300  
C 2.04829000 0.66830300 5.20798600  
H 1.75124100 -1.42708700 5.62638100  
H 2.20024300 2.69431300 4.48354600  
H 2.33317900 0.92042600 6.22570500

### C8

E= -2685.55267au

P -1.91799200 -0.23628500 -0.34277000  
B 1.64193100 -0.21739100 -0.20094800  
O 0.89593400 -0.18291000 -1.53009000  
O 0.68804100 0.24753100 -3.70704400  
C -0.74238500 0.09466000 1.12023400  
H -0.49083100 1.15002100 1.00189000  
C 0.54883600 -0.76295300 0.91267500  
H 0.25607000 -1.79955700 0.73653400  
H 1.04615200 -0.77756400 1.89148700  
C 1.33702600 0.29797700 -2.68027800  
C -2.65805900 1.19533400 -1.24606800  
C -2.90012300 2.47233900 -0.68612700  
C -3.47404400 3.46206600 -1.49246300  
H -3.66140100 4.43885300 -1.05300400  
C -3.79822100 3.24566400 -2.83041700  
C -3.53333300 1.98414500 -3.36688200  
H -3.76791000 1.79132400 -4.41090700  
C -2.96375700 0.95340800 -2.61648200  
C -2.53640300 2.87819400 0.72218600  
H -1.49102000 3.20887000 0.75788100  
H -2.66794100 2.08200000 1.45492900  
H -3.15219300 3.72364100 1.04329200  
C -4.38942300 4.34207200 -3.68205600  
H -3.62812700 4.77246500 -4.34540300  
H -4.79089900 5.15500300 -3.06921000  
H -5.19572500 3.96280500 -4.31961400

|   |             |             |             |
|---|-------------|-------------|-------------|
| C | -2.66381500 | -0.34435900 | -3.33301000 |
| H | -3.04795700 | -1.22135800 | -2.80244500 |
| H | -1.58003800 | -0.45285600 | -3.48186200 |
| H | -3.12721200 | -0.33786500 | -4.32339900 |
| C | -3.13656900 | -1.58501700 | -0.05227600 |
| C | -4.37184100 | -1.33413100 | 0.59803700  |
| C | -5.26922500 | -2.39030100 | 0.77144000  |
| H | -6.21315900 | -2.19193500 | 1.27366700  |
| C | -4.99087800 | -3.68542200 | 0.32946000  |
| C | -3.76617300 | -3.91093300 | -0.30094400 |
| H | -3.52842100 | -4.91385000 | -0.64671400 |
| C | -2.82452400 | -2.89624800 | -0.50995800 |
| C | -4.76407000 | 0.02331000  | 1.13334800  |
| H | -5.74832200 | -0.02563300 | 1.60726900  |
| H | -4.81257500 | 0.77873200  | 0.34293500  |
| H | -4.05662800 | 0.37307000  | 1.89298800  |
| C | -5.99297900 | -4.79996700 | 0.50663600  |
| H | -6.57245100 | -4.67498000 | 1.42728900  |
| H | -5.50335900 | -5.77838900 | 0.53925800  |
| H | -6.70718500 | -4.81875900 | -0.32721100 |
| C | -1.53963300 | -3.28510900 | -1.21762100 |
| H | -1.56628400 | -4.34926100 | -1.46683300 |
| H | -0.64318700 | -3.12215000 | -0.61232700 |
| H | -1.39698500 | -2.73959200 | -2.15693500 |
| C | 2.93679300  | -1.23449400 | -0.41753100 |
| C | 4.14658500  | -0.77582300 | -0.95255700 |
| F | 4.30236300  | 0.53451400  | -1.26168800 |
| C | 5.24806900  | -1.58307000 | -1.22338200 |
| F | 6.37426400  | -1.06069900 | -1.73059400 |
| C | 5.17042900  | -2.94792800 | -0.96835500 |
| F | 6.21378100  | -3.74841700 | -1.21952500 |
| C | 3.98748000  | -3.46786900 | -0.45863700 |
| F | 3.88412400  | -4.78496800 | -0.22013400 |
| C | 2.91223900  | -2.61590800 | -0.20618100 |
| F | 1.80250100  | -3.24091700 | 0.26638900  |
| C | 2.09292500  | 1.29502300  | 0.31107500  |
| C | 3.07504400  | 1.47746400  | 1.29102000  |
| F | 3.74523600  | 0.41257400  | 1.78173700  |
| C | 3.41890500  | 2.71339900  | 1.83281000  |
| F | 4.38010300  | 2.81205200  | 2.76271600  |
| C | 2.74251300  | 3.85677600  | 1.41583400  |
| F | 3.04158900  | 5.05326300  | 1.93838000  |
| C | 1.73754000  | 3.73157300  | 0.46507300  |

|   |             |             |             |
|---|-------------|-------------|-------------|
| F | 1.03119100  | 4.80961200  | 0.08224400  |
| C | 1.44361300  | 2.47312000  | -0.05901100 |
| F | 0.41224000  | 2.44619100  | -0.94681800 |
| H | -1.03610700 | -0.76553300 | -1.29018900 |
| H | 2.34215300  | 0.74910200  | -2.63885100 |
| C | -1.34688100 | -0.10972500 | 2.50140300  |
| C | -1.36341400 | 0.95430500  | 3.41697700  |
| C | -1.78391000 | -1.36973000 | 2.94219100  |
| C | -1.82814100 | 0.77589400  | 4.72184300  |
| H | -0.98603700 | 1.92721500  | 3.11384100  |
| C | -2.25390000 | -1.54795700 | 4.24310600  |
| H | -1.74714500 | -2.22142100 | 2.27128800  |
| C | -2.28372200 | -0.47515700 | 5.13723000  |
| H | -1.82480100 | 1.61473100  | 5.41253500  |
| H | -2.58843100 | -2.53172800 | 4.56111500  |
| H | -2.64560100 | -0.61772300 | 6.15167300  |

## TSC8

E= -2685.521236au

|   |             |             |             |
|---|-------------|-------------|-------------|
| P | -1.80787000 | -0.17682800 | -0.47546400 |
| B | 1.80052300  | -0.16773200 | 0.11059200  |
| O | 0.91588400  | -0.10148700 | -1.81777300 |
| O | 0.29381800  | 0.62749400  | -3.86644400 |
| C | -0.76292900 | -0.04602600 | 1.15931700  |
| H | -0.53375200 | 1.01718900  | 1.23875200  |
| C | 0.56768500  | -0.82217600 | 0.88845700  |
| H | 0.34157500  | -1.82548400 | 0.51553600  |
| H | 1.01792200  | -1.01684900 | 1.87683900  |
| C | 1.14288600  | 0.46047400  | -3.02932200 |
| C | -2.91960100 | 1.27473200  | -0.89690000 |
| C | -3.16896300 | 2.44146600  | -0.13513700 |
| C | -3.98370500 | 3.45201300  | -0.66392300 |
| H | -4.16322800 | 4.33755500  | -0.05784300 |
| C | -4.56672300 | 3.36604900  | -1.92568800 |
| C | -4.28775100 | 2.22654000  | -2.68060700 |
| H | -4.70464400 | 2.13853800  | -3.68171300 |
| C | -3.47088300 | 1.19416100  | -2.21026100 |
| C | -2.58906400 | 2.69967800  | 1.23418600  |
| H | -1.52562400 | 2.96020900  | 1.16917000  |
| H | -2.68762600 | 1.84071800  | 1.89874500  |
| H | -3.09651500 | 3.54457600  | 1.70969200  |
| C | -5.46921700 | 4.45480700  | -2.45490500 |
| H | -6.52709900 | 4.17515800  | -2.36021300 |

|   |             |             |             |
|---|-------------|-------------|-------------|
| H | -5.28170100 | 4.64883700  | -3.51704500 |
| H | -5.32795400 | 5.39306700  | -1.90860400 |
| C | -3.19306700 | 0.05274100  | -3.16697900 |
| H | -3.51751400 | -0.91671900 | -2.77557300 |
| H | -2.12347100 | -0.01267600 | -3.39970500 |
| H | -3.72238800 | 0.21942500  | -4.11005400 |
| C | -2.92662800 | -1.66220600 | -0.30359600 |
| C | -4.14413800 | -1.65710500 | 0.42298700  |
| C | -4.91240700 | -2.82801300 | 0.47639200  |
| H | -5.84213300 | -2.81204400 | 1.04105400  |
| C | -4.52667500 | -4.00749700 | -0.15809200 |
| C | -3.33099500 | -3.99406700 | -0.88096700 |
| H | -3.01314800 | -4.89818000 | -1.39629900 |
| C | -2.52983300 | -2.85203300 | -0.97640300 |
| C | -4.67711700 | -0.44700600 | 1.15424100  |
| H | -5.52764200 | -0.72911800 | 1.78221000  |
| H | -5.01249700 | 0.32960100  | 0.45983600  |
| H | -3.92151000 | -0.00110600 | 1.80597200  |
| C | -5.36505200 | -5.26062800 | -0.07014000 |
| H | -5.61713300 | -5.64292500 | -1.06680200 |
| H | -6.30093000 | -5.07934200 | 0.46736500  |
| H | -4.82843600 | -6.06190600 | 0.45373600  |
| C | -1.28223600 | -2.95313300 | -1.83393700 |
| H | -1.18884600 | -3.96439500 | -2.24176400 |
| H | -0.36361000 | -2.73989000 | -1.27966500 |
| H | -1.31423600 | -2.25629100 | -2.67879600 |
| C | 3.03160200  | -1.10794700 | -0.29903200 |
| C | 4.03716500  | -0.65135100 | -1.16192300 |
| F | 3.96685400  | 0.59705100  | -1.67788300 |
| C | 5.13008500  | -1.41295000 | -1.55836300 |
| F | 6.04602100  | -0.91567600 | -2.39783100 |
| C | 5.26721600  | -2.70864000 | -1.06625800 |
| F | 6.30933900  | -3.45919200 | -1.42846700 |
| C | 4.30664000  | -3.21142800 | -0.19621000 |
| F | 4.42954700  | -4.45321500 | 0.28747500  |
| C | 3.21977700  | -2.41589100 | 0.16572000  |
| F | 2.34948000  | -2.98172300 | 1.02345000  |
| C | 2.14704600  | 1.36860000  | 0.42824600  |
| C | 3.25217100  | 1.67074600  | 1.23420200  |
| F | 4.04164700  | 0.67937500  | 1.69390600  |
| C | 3.59035700  | 2.96282100  | 1.62756100  |
| F | 4.65819400  | 3.18267100  | 2.40316900  |
| C | 2.80120800  | 4.03137500  | 1.21163700  |

|   |             |             |             |
|---|-------------|-------------|-------------|
| F | 3.10348500  | 5.27821900  | 1.58156200  |
| C | 1.68606800  | 3.78433600  | 0.41725100  |
| F | 0.90191400  | 4.79707400  | 0.02775900  |
| C | 1.38414000  | 2.47544000  | 0.04852200  |
| F | 0.27640700  | 2.31983600  | -0.71079900 |
| H | -0.09274700 | -0.19961200 | -1.63056700 |
| H | 2.20236700  | 0.72054700  | -3.14000300 |
| C | -1.35067400 | -0.49967800 | 2.48849000  |
| C | -1.40449100 | 0.39351900  | 3.57153800  |
| C | -1.72931500 | -1.83304200 | 2.72141000  |
| C | -1.85637900 | -0.01390400 | 4.82851800  |
| H | -1.07008800 | 1.41874600  | 3.43617700  |
| C | -2.18233000 | -2.24226500 | 3.97561700  |
| H | -1.66908200 | -2.56022400 | 1.91925800  |
| C | -2.25522800 | -1.33433700 | 5.03425900  |
| H | -1.88617600 | 0.70131200  | 5.64643200  |
| H | -2.47491900 | -3.27820900 | 4.12554700  |
| H | -2.60722000 | -1.65631400 | 6.01055900  |

**D<sub>5</sub>**

**E= -2861.977578au**

|   |           |           |           |
|---|-----------|-----------|-----------|
| C | -3.686122 | -2.315910 | -0.189180 |
| C | -3.451218 | -1.102289 | 0.507977  |
| C | -4.365752 | -0.738200 | 1.537205  |
| C | -5.503359 | -1.518565 | 1.770971  |
| C | -5.774035 | -2.679676 | 1.048862  |
| C | -4.837002 | -3.064069 | 0.090701  |
| P | -1.939418 | 0.013412  | 0.377848  |
| C | -0.076584 | -0.876134 | 3.454303  |
| O | -1.047189 | -1.420976 | 3.809100  |
| C | -4.160258 | 0.460390  | 2.439920  |
| C | -7.027018 | -3.486311 | 1.293977  |
| C | -2.745198 | -2.906354 | -1.219385 |
| C | -0.933581 | -0.339153 | -1.205735 |
| C | 0.341507  | 0.549949  | -1.190695 |
| B | 1.575431  | 0.025964  | -0.399473 |
| O | 0.908115  | -0.328894 | 3.135446  |
| C | 1.974781  | -1.523642 | -0.493404 |
| C | 1.296147  | -2.565449 | 0.135601  |
| C | 1.674872  | -3.901943 | 0.028884  |
| C | 2.789984  | -4.236385 | -0.733544 |
| C | 3.507743  | -3.229428 | -1.375351 |
| C | 3.094246  | -1.909366 | -1.232579 |

|   |           |           |           |
|---|-----------|-----------|-----------|
| F | 0.213271  | -2.307297 | 0.904300  |
| F | 3.824642  | -0.963759 | -1.867271 |
| F | 4.580322  | -3.537384 | -2.113407 |
| F | 3.166140  | -5.512028 | -0.854286 |
| F | 0.975220  | -4.859046 | 0.649221  |
| C | 2.544283  | 0.972427  | 0.420771  |
| C | 3.488396  | 0.468454  | 1.338810  |
| C | 4.329834  | 1.272192  | 2.102417  |
| C | 4.262206  | 2.655340  | 1.972300  |
| C | 3.345275  | 3.213599  | 1.086514  |
| C | 2.513256  | 2.378740  | 0.348456  |
| F | 3.613810  | -0.849265 | 1.551718  |
| F | 5.198693  | 0.726254  | 2.959525  |
| F | 5.064098  | 3.439129  | 2.691211  |
| F | 3.268724  | 4.542792  | 0.955190  |
| F | 1.656096  | 3.014744  | -0.473364 |
| C | -2.634827 | 1.691181  | -0.130136 |
| C | -3.594841 | 1.890737  | -1.155959 |
| C | -3.975741 | 3.195472  | -1.496762 |
| C | -3.449671 | 4.320487  | -0.860799 |
| C | -2.526147 | 4.110434  | 0.164142  |
| C | -2.114919 | 2.827464  | 0.545493  |
| C | -4.285059 | 0.763342  | -1.895686 |
| C | -3.851619 | 5.715983  | -1.276388 |
| C | -1.143653 | 2.726538  | 1.707026  |
| H | -0.654818 | -1.389842 | -1.226904 |
| H | -6.190480 | -1.209826 | 2.556458  |
| H | -4.999226 | -3.986766 | -0.463127 |
| H | -2.114498 | 4.969084  | 0.691010  |
| H | -4.712293 | 3.332241  | -2.286371 |
| H | -4.895256 | 0.453243  | 3.250671  |
| H | -3.163315 | 0.445878  | 2.897163  |
| H | -4.259923 | 1.411630  | 1.906938  |
| H | -2.581246 | -2.244445 | -2.075069 |
| H | -1.767989 | -3.139560 | -0.781966 |
| H | -3.155321 | -3.842775 | -1.609087 |
| H | -7.860342 | -3.126513 | 0.675003  |
| H | -6.877381 | -4.544194 | 1.052417  |
| H | -7.348697 | -3.419395 | 2.339061  |
| H | -0.870459 | 3.726947  | 2.057901  |
| H | -1.585345 | 2.184595  | 2.550899  |
| H | -0.221991 | 2.198754  | 1.448566  |
| H | -3.879301 | 6.397592  | -0.419117 |

|    |           |           |           |
|----|-----------|-----------|-----------|
| H  | -3.139045 | 6.135028  | -1.999644 |
| H  | -4.839019 | 5.725024  | -1.749851 |
| H  | -5.008255 | 0.249944  | -1.253675 |
| H  | -4.825235 | 1.155289  | -2.763483 |
| H  | -3.591827 | -0.001793 | -2.254627 |
| H  | 0.070219  | 1.561202  | -0.875510 |
| H  | -1.546182 | -0.150510 | -2.091442 |
| Si | 0.843256  | 0.897577  | -3.058636 |
| C  | 2.500447  | 1.792616  | -3.256512 |
| H  | 3.335049  | 1.218017  | -2.843726 |
| H  | 2.699388  | 1.938054  | -4.326108 |
| H  | 2.494804  | 2.779223  | -2.783476 |
| C  | 0.912409  | -0.722631 | -4.039184 |
| H  | 0.005005  | -1.325369 | -3.922451 |
| H  | 1.021024  | -0.497439 | -5.107744 |
| H  | 1.768762  | -1.340466 | -3.749052 |
| C  | -0.515156 | 2.014612  | -3.763232 |
| H  | -0.280083 | 2.274567  | -4.803236 |
| H  | -1.502933 | 1.541954  | -3.755638 |
| H  | -0.593558 | 2.948534  | -3.194927 |

### TS<sub>D56</sub>

E= -2861.9573406au

|   |           |           |           |
|---|-----------|-----------|-----------|
| C | -3.806625 | 2.285588  | 0.075996  |
| C | -3.567929 | 1.057727  | -0.598883 |
| C | -4.473407 | 0.655551  | -1.618742 |
| C | -5.600448 | 1.440164  | -1.892528 |
| C | -5.864492 | 2.629014  | -1.217324 |
| C | -4.946046 | 3.030744  | -0.245742 |
| P | -2.080952 | -0.058020 | -0.388227 |
| C | -0.488352 | 0.340925  | -2.330783 |
| O | -1.172050 | 0.566003  | -3.267449 |
| C | -4.286756 | -0.594551 | -2.452746 |
| C | -7.083426 | 3.464183  | -1.528481 |
| C | -2.895573 | 2.883366  | 1.128002  |
| C | -0.965925 | 0.382012  | 1.070106  |
| C | 0.350789  | -0.449868 | 1.016183  |
| B | 1.505592  | 0.063867  | 0.049858  |
| O | 0.584817  | 0.209028  | -1.799655 |
| C | 1.974411  | 1.608907  | 0.190904  |
| C | 1.231718  | 2.737605  | -0.168410 |
| C | 1.662593  | 4.048677  | 0.027437  |
| C | 2.901329  | 4.285190  | 0.611057  |

|   |           |           |           |
|---|-----------|-----------|-----------|
| C | 3.687072  | 3.199815  | 0.986663  |
| C | 3.217475  | 1.909143  | 0.763479  |
| F | 0.008017  | 2.624705  | -0.741747 |
| F | 4.046082  | 0.909772  | 1.139641  |
| F | 4.885125  | 3.403078  | 1.547249  |
| F | 3.328696  | 5.534129  | 0.814031  |
| F | 0.885556  | 5.076728  | -0.336721 |
| C | 2.586429  | -0.964331 | -0.555211 |
| C | 3.551935  | -0.540720 | -1.485211 |
| C | 4.488488  | -1.384161 | -2.074279 |
| C | 4.488049  | -2.738258 | -1.754182 |
| C | 3.544179  | -3.219666 | -0.855558 |
| C | 2.619274  | -2.340998 | -0.293959 |
| F | 3.608050  | 0.744755  | -1.874961 |
| F | 5.381541  | -0.907190 | -2.949862 |
| F | 5.378332  | -3.564106 | -2.308161 |
| F | 3.518971  | -4.522458 | -0.544579 |
| F | 1.731320  | -2.922274 | 0.544732  |
| C | -2.730566 | -1.728846 | 0.158943  |
| C | -3.667315 | -1.872592 | 1.216115  |
| C | -4.058327 | -3.157792 | 1.610454  |
| C | -3.565147 | -4.311926 | 1.000287  |
| C | -2.661770 | -4.152225 | -0.050747 |
| C | -2.236597 | -2.891769 | -0.487197 |
| C | -4.312927 | -0.708172 | 1.937402  |
| C | -3.979269 | -5.684792 | 1.473399  |
| C | -1.273175 | -2.851563 | -1.656364 |
| H | -0.746789 | 1.444236  | 1.036367  |
| H | -6.285655 | 1.107585  | -2.669174 |
| H | -5.116944 | 3.964362  | 0.286567  |
| H | -2.273759 | -5.034903 | -0.554417 |
| H | -4.775862 | -3.254721 | 2.422726  |
| H | -5.020585 | -0.617765 | -3.263951 |
| H | -3.292680 | -0.622603 | -2.910852 |
| H | -4.412009 | -1.510145 | -1.865191 |
| H | -2.706598 | 2.202521  | 1.962960  |
| H | -1.929103 | 3.173956  | 0.703500  |
| H | -3.349859 | 3.786790  | 1.544848  |
| H | -7.700566 | 3.618319  | -0.634618 |
| H | -6.801645 | 4.457851  | -1.898747 |
| H | -7.709453 | 2.989286  | -2.290261 |
| H | -1.089356 | -3.864430 | -2.027080 |
| H | -1.668033 | -2.260892 | -2.489494 |

|   |           |           |           |
|---|-----------|-----------|-----------|
| H | -0.304057 | -2.422996 | -1.384726 |
| H | -3.970437 | -6.410917 | 0.653642  |
| H | -3.293895 | -6.058509 | 2.245885  |
| H | -4.984175 | -5.673441 | 1.908450  |
| H | -5.028862 | -0.185707 | 1.294996  |
| H | -4.851300 | -1.064366 | 2.820897  |
| H | -3.588855 | 0.039175  | 2.273575  |
| H | 0.093533  | -1.484770 | 0.771173  |
| H | -1.517254 | 0.197092  | 1.996757  |
| S | 0.938435  | -0.626708 | 2.869164  |
| C | 2.671267  | -1.347095 | 3.117723  |
| H | 3.453223  | -0.740049 | 2.654730  |
| H | 2.879588  | -1.391355 | 4.194637  |
| H | 2.747417  | -2.364614 | 2.723734  |
| C | 0.870934  | 1.063461  | 3.732695  |
| H | -0.119649 | 1.528356  | 3.670646  |
| H | 1.108168  | 0.942356  | 4.797139  |
| H | 1.597235  | -1.769869 | 3.315263  |
| C | -0.287730 | -1.806508 | 3.710256  |
| H | -0.048277 | -1.899822 | 4.777097  |
| H | -1.330410 | -1.478203 | 3.635141  |
| H | -0.227072 | -2.808602 | 3.269327  |

## D<sub>6</sub>

E= -2861.97531au

|   |           |           |           |
|---|-----------|-----------|-----------|
| C | -3.775909 | 2.296241  | 0.026141  |
| C | -3.529799 | 1.037879  | -0.586906 |
| C | -4.437356 | 0.547382  | -1.569078 |
| C | -5.555947 | 1.319808  | -1.897623 |
| C | -5.817408 | 2.556046  | -1.308775 |
| C | -4.915223 | 3.016003  | -0.350595 |
| P | -2.047845 | -0.006332 | -0.187861 |
| C | -0.851408 | 0.191336  | -1.714387 |
| O | -1.375854 | 0.329305  | -2.799204 |
| C | -4.293134 | -0.774535 | -2.293390 |
| C | -7.015623 | 3.378789  | -1.713915 |
| C | -2.894642 | 2.949678  | 1.069995  |
| C | -0.955935 | 0.455748  | 1.241933  |
| C | 0.349519  | -0.379075 | 1.135752  |
| B | 1.278149  | 0.096684  | -0.139446 |
| O | 0.403727  | 0.204317  | -1.452187 |
| C | 1.894392  | 1.622482  | 0.069430  |
| C | 1.175642  | 2.787113  | -0.209044 |

|   |           |           |           |
|---|-----------|-----------|-----------|
| C | 1.656485  | 4.081479  | -0.023474 |
| C | 2.945558  | 4.265088  | 0.460588  |
| C | 3.716780  | 3.144445  | 0.751452  |
| C | 3.184807  | 1.872779  | 0.548934  |
| F | -0.104801 | 2.723714  | -0.676640 |
| F | 4.014639  | 0.847756  | 0.849629  |
| F | 4.964914  | 3.297013  | 1.214632  |
| F | 3.433339  | 5.496144  | 0.652039  |
| F | 0.882432  | 5.142255  | -0.298999 |
| C | 2.416207  | -0.984464 | -0.654626 |
| C | 3.316489  | -0.616193 | -1.665528 |
| C | 4.266433  | -1.470433 | -2.217457 |
| C | 4.342291  | -2.787270 | -1.774096 |
| C | 3.461608  | -3.216070 | -0.790445 |
| C | 2.524934  | -2.322343 | -0.269809 |
| F | 3.301919  | 0.636131  | -2.162274 |
| F | 5.102473  | -1.041200 | -3.173488 |
| F | 5.245160  | -3.627938 | -2.292852 |
| F | 3.503911  | -4.486688 | -0.358764 |
| F | 1.690788  | -2.864480 | 0.657554  |
| C | -2.597231 | -1.736063 | 0.192495  |
| C | -3.566224 | -1.900490 | 1.220471  |
| C | -3.946707 | -3.195764 | 1.586113  |
| C | -3.416163 | -4.332862 | 0.976750  |
| C | -2.482824 | -4.144812 | -0.042811 |
| C | -2.056063 | -2.877671 | -0.455833 |
| C | -4.265977 | -0.761108 | 1.935668  |
| C | -3.819195 | -5.718392 | 1.418339  |
| C | -1.053135 | -2.829403 | -1.587360 |
| H | -0.745384 | 1.520124  | 1.188073  |
| H | -6.242203 | 0.935415  | -2.648382 |
| H | -5.096236 | 3.976502  | 0.125630  |
| H | -2.063221 | -5.014897 | -0.541608 |
| H | -4.685271 | -3.313544 | 2.375592  |
| H | -4.994230 | -0.811543 | -3.132005 |
| H | -3.289410 | -0.894748 | -2.703971 |
| H | -4.512837 | -1.627376 | -1.642849 |
| H | -2.725109 | 2.310192  | 1.941147  |
| H | -1.921872 | 3.231108  | 0.657170  |
| H | -3.370185 | 3.864895  | 1.432199  |
| H | -7.363946 | 4.012584  | -0.891895 |
| H | -6.767076 | 4.040785  | -2.553880 |
| H | -7.848064 | 2.744228  | -2.035130 |

|    |           |           |           |
|----|-----------|-----------|-----------|
| H  | -0.814649 | -3.844902 | -1.913983 |
| H  | -1.434211 | -2.285746 | -2.457035 |
| H  | -0.113450 | -2.357654 | -1.292422 |
| H  | -3.842115 | -6.416526 | 0.575021  |
| H  | -3.104758 | -6.117106 | 2.150498  |
| H  | -4.806697 | -5.718458 | 1.890658  |
| H  | -5.003717 | -0.274653 | 1.289117  |
| H  | -4.792861 | -1.143523 | 2.814333  |
| H  | -3.584985 | 0.019880  | 2.285499  |
| H  | 0.059649  | -1.426245 | 0.989529  |
| H  | -1.515190 | 0.272229  | 2.164840  |
| Si | 1.090156  | -0.425555 | 2.920418  |
| C  | 2.811454  | -1.191747 | 3.078102  |
| H  | 3.558835  | -0.658685 | 2.486433  |
| H  | 3.121834  | -1.149205 | 4.130191  |
| H  | 2.815923  | -2.241245 | 2.769723  |
| C  | 1.132255  | 1.319801  | 3.672052  |
| H  | 0.141507  | 1.789039  | 3.709393  |
| H  | 1.502616  | 1.269787  | 4.703714  |
| H  | 1.796707  | 1.991468  | 3.117953  |
| C  | -0.089959 | -1.490294 | 3.968729  |
| H  | 0.250585  | -1.518216 | 5.011459  |
| H  | -1.123388 | -1.122391 | 3.977971  |
| H  | -0.111749 | -2.524232 | 3.603166  |

## D7

E= -2863.152431au

|   |             |             |             |
|---|-------------|-------------|-------------|
| P | -2.04552100 | -0.03839300 | -0.17372700 |
| B | 1.27940100  | 0.08325900  | -0.13096600 |
| O | 0.40207300  | 0.21195300  | -1.43885200 |
| O | -1.38080700 | 0.33673100  | -2.78160800 |
| C | -0.95164500 | 0.40705300  | 1.26009400  |
| H | -0.74440300 | 1.47295400  | 1.22163100  |
| H | -1.50743800 | 0.20841400  | 2.18194900  |
| C | 0.35564500  | -0.42228700 | 1.13594900  |
| H | 0.06857700  | -1.46681500 | 0.96700300  |
| C | -0.85356100 | 0.18947400  | -1.69953100 |
| C | -3.53433100 | 1.00273100  | -0.55256700 |
| C | -3.78504300 | 2.25042800  | 0.07979700  |
| C | -4.92876600 | 2.97014600  | -0.28340100 |
| H | -5.11314000 | 3.92267800  | 0.20728300  |
| C | -5.83070900 | 2.52010400  | -1.24648700 |
| C | -5.56480600 | 1.29385100  | -1.85413500 |



|   |              |              |              |                          |              |              |              |
|---|--------------|--------------|--------------|--------------------------|--------------|--------------|--------------|
| C | 5. 41316700  | -2. 82822300 | 0. 00647200  | C                        | -3. 79756400 | 3. 40065600  | -1. 26012900 |
| H | 5. 71021200  | -3. 68188200 | 0. 61124600  | F                        | -4. 51745200 | 4. 45438800  | -1. 66010800 |
| C | 6. 24812100  | -2. 41575100 | -1. 02926500 | C                        | -3. 03810800 | 3. 46430400  | -0. 10009800 |
| C | 5. 82954900  | -1. 32619000 | -1. 79441600 | F                        | -3. 02024600 | 4. 59143500  | 0. 62697800  |
| H | 6. 45029600  | -0. 98592600 | -2. 62062600 | C                        | -2. 28805300 | 2. 35624700  | 0. 29986900  |
| C | 4. 62734600  | -0. 65893600 | -1. 54901300 | F                        | -1. 58607900 | 2. 54531200  | 1. 44358600  |
| C | 3. 41665800  | -2. 78597900 | 1. 46295000  | C                        | -2. 20957900 | -1. 59219700 | -0. 08184500 |
| H | 2. 45636900  | -3. 20435000 | 1. 14508400  | C                        | -3. 58033400 | -1. 65433700 | 0. 20243700  |
| H | 3. 21618100  | -2. 05774800 | 2. 25311500  | F                        | -4. 27811500 | -0. 53802700 | 0. 50362000  |
| H | 3. 98600500  | -3. 60314600 | 1. 91430100  | C                        | -4. 32522700 | -2. 83277000 | 0. 22013300  |
| C | 7. 54629900  | -3. 12546900 | -1. 32904800 | F                        | -5. 63233300 | -2. 80470800 | 0. 50800000  |
| H | 7. 52314700  | -3. 59070500 | -2. 32250000 | C                        | -3. 70614800 | -4. 04265800 | -0. 07089000 |
| H | 7. 75144500  | -3. 91223400 | -0. 59668200 | F                        | -4. 40135800 | -5. 18378700 | -0. 06413600 |
| H | 8. 39248100  | -2. 42781900 | -1. 32144600 | C                        | -2. 34657600 | -4. 04531100 | -0. 36125600 |
| C | 4. 26602400  | 0. 47860800  | -2. 48147800 | F                        | -1. 72090900 | -5. 19728600 | -0. 63881300 |
| H | 4. 21896900  | 1. 44130700  | -1. 96203900 | C                        | -1. 64756600 | -2. 84171700 | -0. 35470600 |
| H | 3. 29798000  | 0. 31274100  | -2. 96783100 | F                        | -0. 31966100 | -2. 95576800 | -0. 63449100 |
| H | 5. 01406400  | 0. 56721300  | -3. 27465000 | H                        | 1. 05100400  | -1. 68418700 | -1. 72811800 |
| C | 2. 57363200  | 1. 64257700  | 0. 13549100  | H                        | 1. 55017900  | -1. 12345600 | -1. 32949100 |
| C | 2. 06063500  | 2. 71846100  | -0. 63133300 | Si                       | -0. 95892400 | -0. 33290100 | 2. 94595500  |
| C | 2. 35150100  | 4. 03247900  | -0. 24392700 | C                        | -0. 95269100 | -2. 19824200 | 3. 31492300  |
| H | 1. 95185700  | 4. 84733100  | -0. 84299600 | H                        | -1. 23624400 | -2. 36857200 | 4. 36125900  |
| C | 3. 12989000  | 4. 32798500  | 0. 87348100  | H                        | -1. 66810000 | -2. 74399000 | 2. 69000600  |
| C | 3. 63644200  | 3. 25533500  | 1. 60809500  | H                        | 0. 03334600  | -2. 65525100 | 3. 16870200  |
| H | 4. 25852800  | 3. 45792700  | 2. 47709300  | C                        | 0. 21619900  | 0. 51462400  | 4. 17932800  |
| C | 3. 37955400  | 1. 92079900  | 1. 27434400  | H                        | -0. 16441800 | 0. 39813000  | 5. 20192000  |
| C | 1. 19543400  | 2. 53895200  | -1. 85652600 | H                        | 1. 23148200  | 0. 09977700  | 4. 16747000  |
| H | 1. 07604000  | 3. 49281800  | -2. 37849600 | H                        | 0. 29293900  | 1. 58998400  | 3. 97790900  |
| H | 0. 19381100  | 2. 18487200  | -1. 59353900 | C                        | -2. 69625300 | 0. 33235900  | 3. 30055900  |
| H | 1. 61317400  | 1. 82617700  | -2. 57145600 | H                        | -2. 70714200 | 1. 42623700  | 3. 31232400  |
| C | 3. 39983400  | 5. 75446000  | 1. 28658300  | H                        | -3. 44631900 | 0. 00195700  | 2. 57776900  |
| H | 3. 39545400  | 6. 42950500  | 0. 42458500  | H                        | -3. 01202600 | -0. 01683200 | 4. 29211500  |
| H | 4. 36676900  | 5. 84997000  | 1. 79170400  |                          |              |              |              |
| H | 2. 63076600  | 6. 11174200  | 1. 98418400  |                          |              |              |              |
| C | 3. 99574000  | 0. 87077600  | 2. 17344700  |                          |              |              |              |
| H | 4. 67318500  | 1. 34415200  | 2. 88972500  |                          |              |              |              |
| H | 4. 56698100  | 0. 12620700  | 1. 61502100  |                          |              |              |              |
| H | 3. 23797200  | 0. 33868500  | 2. 75962700  |                          |              |              |              |
| C | -2. 25403200 | 1. 14633200  | -0. 39898000 |                          |              |              |              |
| C | -3. 03952200 | 1. 14353100  | -1. 56264800 |                          |              |              |              |
| F | -3. 09526100 | 0. 03503500  | -2. 32790000 |                          |              |              |              |
| C | -3. 79791400 | 2. 22265000  | -2. 00181100 |                          |              |              |              |
| F | -4. 52494500 | 2. 14079100  | -3. 12440200 |                          |              |              |              |
|   |              |              |              | <b>D8</b>                |              |              |              |
|   |              |              |              | <b>E= -2863.178768au</b> |              |              |              |
|   |              |              |              | P                        | 2. 20081700  | 0. 29580400  | -0. 09513300 |
|   |              |              |              | B                        | -1. 36587500 | -0. 02924200 | -0. 22534700 |
|   |              |              |              | O                        | -0. 48972300 | 0. 12583000  | -1. 47637100 |
|   |              |              |              | O                        | 0. 12520400  | -0. 23012000 | -3. 58279000 |
|   |              |              |              | C                        | 0. 92400700  | -0. 11513200 | 1. 19721400  |
|   |              |              |              | H                        | 0. 78544100  | -1. 19613600 | 1. 16531300  |
|   |              |              |              | H                        | 1. 39685900  | 0. 11450100  | 2. 15865900  |
|   |              |              |              | C                        | -0. 43168500 | 0. 63233900  | 0. 99372000  |



|   |             |             |             |    |             |             |             |
|---|-------------|-------------|-------------|----|-------------|-------------|-------------|
| H | -0.19691900 | 1.66075300  | 0.69482100  | C  | -3.83967500 | 0.22809000  | -1.25437300 |
| C | -0.68151100 | -0.37278000 | -2.68185400 | F  | -3.84252100 | -1.09668700 | -1.53442500 |
| C | 3.45588100  | -0.99020800 | -0.50521000 | C  | -4.96891400 | 0.92225400  | -1.68383300 |
| C | 3.80315500  | -2.07524300 | 0.33727700  | F  | -5.98020700 | 0.27933800  | -2.28541000 |
| C | 4.76650800  | -2.98700900 | -0.10920400 | C  | -5.03588800 | 2.29863100  | -1.50037200 |
| H | 5.03539500  | -3.81385100 | 0.54383500  | F  | -6.10813300 | 2.98921600  | -1.90630400 |
| C | 5.37871900  | -2.88270900 | -1.35827200 | C  | -3.96362200 | 2.94598800  | -0.89907900 |
| C | 5.00265400  | -1.81901100 | -2.18073800 | F  | -3.99521300 | 4.27665600  | -0.72591800 |
| H | 5.45775000  | -1.72094600 | -3.16334400 | C  | -2.85759800 | 2.20377200  | -0.48987600 |
| C | 4.05138800  | -0.87282300 | -1.79239300 | F  | -1.85394400 | 2.94512600  | 0.05266600  |
| C | 3.16736200  | -2.36592100 | 1.67996900  | C  | -1.62631400 | -1.63602600 | 0.10484100  |
| H | 2.19502200  | -2.85572900 | 1.54910800  | C  | -2.70835800 | -2.08415800 | 0.86780900  |
| H | 3.01241800  | -1.47701900 | 2.29399900  | F  | -3.61971000 | -1.19895500 | 1.33511400  |
| H | 3.79739100  | -3.05234400 | 2.25270000  | C  | -2.92812800 | -3.41118600 | 1.22358500  |
| C | 6.38845500  | -3.90425200 | -1.82107200 | F  | -3.98872800 | -3.75446700 | 1.96838100  |
| H | 5.90498000  | -4.68205400 | -2.42660600 | C  | -2.02664700 | -4.38772600 | 0.81071000  |
| H | 6.87333300  | -4.40201600 | -0.97534000 | F  | -2.21084500 | -5.67048300 | 1.14663800  |
| H | 7.16578800  | -3.44658500 | -2.44203500 | C  | -0.92161000 | -4.00411900 | 0.06176300  |
| C | 3.68269600  | 0.20646100  | -2.78737500 | F  | -0.01985000 | -4.92148000 | -0.32375400 |
| H | 3.78537600  | 1.21333900  | -2.36829000 | C  | -0.74968500 | -2.65894100 | -0.26671700 |
| H | 2.65089800  | 0.08695400  | -3.14583300 | F  | 0.38226300  | -2.38571700 | -0.97347900 |
| H | 4.33831900  | 0.14997200  | -3.66058900 | H  | 1.45986700  | 0.43172700  | -1.27177800 |
| C | 2.93137100  | 1.95735700  | 0.20167300  | H  | -1.62610400 | -0.92820800 | -2.81470900 |
| C | 3.92458200  | 2.14570000  | 1.19724400  | Si | -1.15907500 | 0.90470000  | 2.76270200  |
| C | 4.46801800  | 3.41822000  | 1.37954900  | C  | -1.21433200 | -0.70906700 | 3.76764400  |
| H | 5.22753600  | 3.55532800  | 2.14580700  | H  | -0.28724200 | -1.29148700 | 3.70053500  |
| C | 4.06359400  | 4.51522600  | 0.61426800  | H  | -1.37345200 | -0.47499400 | 4.82795400  |
| C | 3.07298900  | 4.31112500  | -0.34623400 | H  | -2.03937600 | -1.35436600 | 3.45031700  |
| H | 2.73286700  | 5.15597500  | -0.93986000 | C  | -2.87429200 | 1.70120000  | 2.82103700  |
| C | 2.48631600  | 3.06022000  | -0.57804400 | H  | -2.87918100 | 2.69469300  | 2.36167000  |
| C | 4.41540000  | 1.03138400  | 2.09351000  | H  | -3.62883600 | 1.08767200  | 2.32209300  |
| H | 5.20201900  | 1.39587300  | 2.75982900  | H  | -3.17695100 | 1.81769400  | 3.86975800  |
| H | 4.82553900  | 0.19092700  | 1.52497000  | C  | 0.02784500  | 2.09705200  | 3.65981800  |
| H | 3.61255500  | 0.64262300  | 2.73191500  | H  | -0.34828500 | 2.31601800  | 4.66719000  |
| C | 4.69254000  | 5.87302100  | 0.81053200  | H  | 1.04395200  | 1.70012600  | 3.77950100  |
| H | 4.92357100  | 6.05872500  | 1.86485800  | H  | 0.10843400  | 3.05205200  | 3.12606900  |
| H | 4.03534200  | 6.67377800  | 0.45763900  |    |             |             |             |
| H | 5.63513300  | 5.95129900  | 0.25275000  |    |             |             |             |
| C | 1.39423100  | 2.99396400  | -1.62801700 |    |             |             |             |
| H | 1.31123600  | 3.96195500  | -2.12972700 |    |             |             |             |
| H | 0.41679400  | 2.76996600  | -1.19044300 |    |             |             |             |
| H | 1.57372100  | 2.24220700  | -2.40261000 |    |             |             |             |
| C | -2.74592700 | 0.81536100  | -0.60658600 |    |             |             |             |

## TSD8

E= -2863.152738au

|   |             |             |             |
|---|-------------|-------------|-------------|
| P | -2.12574100 | -0.17304100 | -0.28815000 |
| B | 1.45386000  | 0.03935600  | 0.00054300  |
| O | 0.46268700  | 0.05525400  | -1.67183300 |
| O | -0.17547500 | 0.70947900  | -3.73518900 |

|   |             |             |             |    |             |             |             |
|---|-------------|-------------|-------------|----|-------------|-------------|-------------|
| C | -0.98824200 | 0.22406900  | 1.16936200  | H  | -1.37226700 | -3.90489800 | -2.13982900 |
| H | -0.81009600 | 1.29672800  | 1.17894000  | H  | -0.41327400 | -2.72426600 | -1.25231200 |
| H | -1.49239000 | -0.02294900 | 2.10781800  | H  | -1.63588900 | -2.17733400 | -2.40061300 |
| C | 0.35605200  | -0.55838000 | 1.01717300  | C  | 2.64283400  | -0.92117100 | -0.54973400 |
| H | 0.11037300  | -1.58320400 | 0.72009600  | C  | 3.68574800  | -0.42601400 | -1.34803000 |
| C | 0.67195000  | 0.62744200  | -2.88637600 | F  | 3.72382200  | 0.88284700  | -1.68940900 |
| C | -3.51378000 | 1.04833900  | -0.56029700 | C  | 4.71479800  | -1.20141600 | -1.87267900 |
| C | -3.83049600 | 2.18406300  | 0.22584100  | F  | 5.67462600  | -0.64613400 | -2.62213600 |
| C | -4.88425500 | 3.01895000  | -0.17144400 | C  | 4.73244300  | -2.56973400 | -1.62247800 |
| H | -5.11697800 | 3.88364200  | 0.44655300  | F  | 5.70834900  | -3.33602700 | -2.11418400 |
| C | -5.63732800 | 2.78797700  | -1.32112800 | C  | 3.71062200  | -3.12692800 | -0.86380600 |
| C | -5.28855100 | 1.68842900  | -2.10686300 | F  | 3.69696900  | -4.44436500 | -0.62557100 |
| H | -5.83718300 | 1.49714000  | -3.02678100 | C  | 2.69763700  | -2.30926600 | -0.36478800 |
| C | -4.24191500 | 0.82852600  | -1.76454700 | F  | 1.74047500  | -2.96733200 | 0.32922400  |
| C | -3.07601400 | 2.60338600  | 1.46949800  | C  | 1.82650900  | 1.60760800  | 0.22412300  |
| H | -2.09780500 | 3.02539500  | 1.21063000  | C  | 3.01305800  | 1.97411400  | 0.87123000  |
| H | -2.91140600 | 1.77982800  | 2.16749100  | F  | 3.90136800  | 1.02515200  | 1.24048000  |
| H | -3.63071700 | 3.38090500  | 2.00306100  | C  | 3.36500900  | 3.28469000  | 1.17930700  |
| C | -6.78954500 | 3.68641300  | -1.70207800 | F  | 4.51884400  | 3.55311200  | 1.80210500  |
| H | -6.73286900 | 4.65133100  | -1.18798000 | C  | 2.50634200  | 4.32243400  | 0.82827000  |
| H | -7.75272200 | 3.22925200  | -1.43855900 | F  | 2.82103900  | 5.58864400  | 1.11440400  |
| H | -6.80853000 | 3.87693700  | -2.78107500 | C  | 1.31464500  | 4.01963000  | 0.18075100  |
| C | -3.90989100 | -0.28757000 | -2.73296500 | F  | 0.46642100  | 4.99919000  | -0.15757300 |
| H | -3.99414300 | -1.27935500 | -2.27565700 | C  | 1.00524300  | 2.69028000  | -0.10417000 |
| H | -2.88844100 | -0.18205800 | -3.12010000 | F  | -0.17873100 | 2.50102200  | -0.73708200 |
| H | -4.59127500 | -0.26109800 | -3.58867600 | H  | -0.56171500 | -0.10162400 | -1.47622600 |
| C | -2.88722500 | -1.81569100 | 0.17710500  | H  | 1.70730200  | 0.98026500  | -2.97834100 |
| C | -3.85561500 | -1.96807700 | 1.20509300  | Si | 1.00814300  | -0.84319000 | 2.83030100  |
| C | -4.35672900 | -3.24180400 | 1.49153100  | C  | 0.95164500  | 0.77950100  | 3.81567500  |
| H | -5.09532900 | -3.34341500 | 2.28426000  | H  | -0.04441400 | 1.23653100  | 3.82165700  |
| C | -3.94297700 | -4.38194200 | 0.79915600  | H  | 1.22726800  | 0.58463100  | 4.85971800  |
| C | -2.99062400 | -4.21819800 | -0.20531400 | H  | 1.65635500  | 1.52277700  | 3.42646300  |
| H | -2.64760800 | -5.09135700 | -0.75599500 | C  | 2.75671000  | -1.55508500 | 2.99006000  |
| C | -2.45467100 | -2.96585400 | -0.53438600 | H  | 2.84107100  | -2.54437300 | 2.53021900  |
| C | -4.38665200 | -0.81563600 | 2.02852700  | H  | 3.51973100  | -0.90506100 | 2.55458900  |
| H | -5.11644700 | -1.17575700 | 2.75980200  | H  | 2.98714500  | -1.66695900 | 4.05755700  |
| H | -4.87590000 | -0.05936100 | 1.40827200  | C  | -0.17262800 | -2.09818100 | 3.62889100  |
| H | -3.59279900 | -0.30918700 | 2.58894000  | H  | 0.08018300  | -2.23729400 | 4.68755300  |
| C | -4.52631200 | -5.73856500 | 1.11483900  | H  | -1.22591300 | -1.79984600 | 3.57951700  |
| H | -4.68025600 | -5.86753000 | 2.19195800  | H  | -0.08651300 | -3.07546100 | 3.13875100  |
| H | -3.87536300 | -6.54615500 | 0.76487000  |    |             |             |             |
| H | -5.50322400 | -5.87097400 | 0.63090900  |    |             |             |             |
| C | -1.41637700 | -2.93220800 | -1.64006800 |    |             |             |             |

**E<sub>5</sub>**

**E= -2790.338086au**

|   |           |           |           |
|---|-----------|-----------|-----------|
| C | -2.276087 | 2.492454  | 0.508553  |
| C | -1.972414 | 1.454684  | -0.412603 |
| C | -1.696705 | 1.813575  | -1.765489 |
| C | -1.705044 | 3.158083  | -2.149142 |
| C | -1.955150 | 4.188170  | -1.241454 |
| C | -2.254254 | 3.824681  | 0.070662  |
| P | -1.680140 | -0.371914 | -0.105882 |
| C | 4.935590  | 1.311031  | -1.895970 |
| O | 4.873375  | 2.374864  | -1.415243 |
| C | -1.363327 | 0.790251  | -2.834374 |
| C | -1.866984 | 5.639214  | -1.648482 |
| C | -2.641449 | 2.303431  | 1.969613  |
| C | -1.346746 | -0.660902 | 1.773031  |
| C | 0.050705  | -1.313503 | 1.920700  |
| B | 1.229719  | -0.688193 | 1.061082  |
| O | 5.007422  | 0.251303  | -2.385467 |
| C | 1.313667  | 0.875881  | 0.839859  |
| C | 1.668153  | 1.443154  | -0.390478 |
| C | 1.675628  | 2.809970  | -0.631848 |
| C | 1.340111  | 3.684000  | 0.399468  |
| C | 1.010135  | 3.174833  | 1.651302  |
| C | 0.999784  | 1.797340  | 1.843952  |
| F | 1.997108  | 0.643947  | -1.427797 |
| F | 0.650398  | 1.364345  | 3.075519  |
| F | 0.664460  | 4.003233  | 2.644286  |
| F | 1.319006  | 5.000690  | 0.181702  |
| F | 1.991888  | 3.290017  | -1.838304 |
| C | 2.433111  | -1.596024 | 0.578820  |
| C | 3.747158  | -1.102465 | 0.473594  |
| C | 4.840969  | -1.875991 | 0.103278  |
| C | 4.654635  | -3.220831 | -0.200584 |
| C | 3.376410  | -3.766504 | -0.123035 |
| C | 2.308402  | -2.962835 | 0.265122  |
| F | 4.024907  | 0.186445  | 0.748403  |
| F | 6.060770  | -1.334192 | 0.028772  |
| F | 5.687014  | -3.978294 | -0.564606 |
| F | 3.184203  | -5.055363 | -0.421121 |
| F | 1.113546  | -3.577502 | 0.294974  |
| C | -3.219545 | -1.305516 | -0.645036 |
| C | -4.546866 | -0.799790 | -0.691464 |
| C | -5.557783 | -1.584395 | -1.261062 |
| C | -5.323432 | -2.853756 | -1.788911 |
| C | -4.021012 | -3.346211 | -1.722040 |

|   |           |           |           |
|---|-----------|-----------|-----------|
| C | -2.971466 | -2.605220 | -1.169405 |
| C | -4.970533 | 0.544493  | -0.146440 |
| C | -6.434212 | -3.654576 | -2.425127 |
| C | -1.612230 | -3.265819 | -1.123587 |
| H | 0.364583  | -1.221273 | 2.974913  |
| H | -1.324225 | 0.313217  | 2.253299  |
| H | -1.490075 | 3.404443  | -3.186670 |
| H | -2.484749 | 4.605812  | 0.793023  |
| H | -3.807758 | -4.340463 | -2.109167 |
| H | -6.569467 | -1.184262 | -1.282161 |
| H | -1.280313 | 1.278871  | -3.810183 |
| H | -0.409263 | 0.292344  | -2.624254 |
| H | -2.124297 | 0.007041  | -2.919338 |
| H | -3.155437 | 1.365839  | 2.175048  |
| H | -1.758779 | 2.354644  | 2.621082  |
| H | -3.304367 | 3.114266  | 2.288586  |
| H | -2.620623 | 6.248329  | -1.137211 |
| H | -0.883031 | 6.050096  | -1.385869 |
| H | -2.000024 | 5.764752  | -2.727896 |
| H | -1.616151 | -4.192019 | -1.706759 |
| H | -0.819625 | -2.618881 | -1.511251 |
| H | -1.339845 | -3.527472 | -0.096705 |
| H | -6.530686 | -3.417583 | -3.493368 |
| H | -6.248142 | -4.730970 | -2.346793 |
| H | -7.401371 | -3.440775 | -1.957477 |
| H | -4.582630 | 1.376036  | -0.741747 |
| H | -6.062418 | 0.618253  | -0.143055 |
| H | -4.627760 | 0.686349  | 0.879372  |
| H | -0.026405 | -2.385023 | 1.736025  |
| C | -2.383246 | -1.467001 | 2.533435  |
| F | -2.514007 | -2.726985 | 2.060174  |
| F | -2.043522 | -1.577686 | 3.842117  |
| F | -3.614196 | -0.900284 | 2.504539  |

**TS<sub>E56</sub>**

**E= -2790.3130418au**

|   |          |           |           |
|---|----------|-----------|-----------|
| C | 3.447562 | -2.334257 | -0.205099 |
| C | 3.297646 | -0.999518 | -0.674384 |
| C | 4.214056 | -0.516281 | -1.650962 |
| C | 5.305854 | -1.310284 | -2.023293 |
| C | 5.517357 | -2.584257 | -1.504325 |
| C | 4.559778 | -3.076512 | -0.617342 |
| P | 1.879540 | 0.160027  | -0.295509 |



|   |           |           |           |
|---|-----------|-----------|-----------|
| C | -4.156362 | 4.127952  | 0.412239  |
| C | -4.344741 | 3.235300  | -0.639928 |
| H | -5.000156 | 3.517171  | -1.459938 |
| C | -3.729365 | 1.980098  | -0.693972 |
| C | -2.019728 | 2.126441  | 2.801189  |
| H | -2.153681 | 2.951466  | 3.505048  |
| H | -0.944462 | 1.974179  | 2.697835  |
| H | -2.449497 | 1.237384  | 3.276888  |
| C | -4.784057 | 5.498993  | 0.402663  |
| H | -4.989576 | 5.854737  | 1.417537  |
| H | -5.722010 | 5.507375  | -0.162021 |
| H | -4.112192 | 6.227918  | -0.069194 |
| C | -4.137217 | 1.101764  | -1.861645 |
| H | -3.286914 | 0.656582  | -2.374436 |
| H | -4.677025 | 1.705635  | -2.596263 |
| H | -4.809233 | 0.301242  | -1.533413 |
| C | -3.025315 | -1.355295 | -0.289107 |
| C | -4.116373 | -1.569078 | 0.599463  |
| C | -5.028453 | -2.586755 | 0.311402  |
| H | -5.860674 | -2.743438 | 0.993447  |
| C | -4.900410 | -3.413424 | -0.805971 |
| C | -3.806459 | -3.203134 | -1.643174 |
| H | -3.675237 | -3.844725 | -2.510844 |
| C | -2.855587 | -2.199943 | -1.418025 |
| C | -4.358873 | -0.776513 | 1.867032  |
| H | -3.473346 | -0.753231 | 2.509867  |
| H | -5.157479 | -1.244935 | 2.448732  |
| H | -4.656659 | 0.256674  | 1.665787  |
| C | -5.887194 | -4.523333 | -1.072515 |
| H | -5.970699 | -4.736560 | -2.142978 |
| H | -6.883435 | -4.273961 | -0.692875 |
| H | -5.572077 | -5.451770 | -0.578233 |
| C | -1.728852 | -2.103005 | -2.422269 |
| H | -1.833230 | -1.228400 | -3.072130 |
| H | -1.734334 | -2.988135 | -3.063904 |
| H | -0.742650 | -2.053023 | -1.958654 |
| C | 2.413859  | -1.200710 | -0.010228 |
| C | 2.401289  | -2.174811 | -1.010453 |
| F | 1.631442  | -2.043029 | -2.113997 |
| C | 3.153502  | -3.349489 | -0.954591 |
| F | 3.082600  | -4.249459 | -1.948133 |
| C | 3.978878  | -3.588806 | 0.136302  |
| F | 4.706916  | -4.710629 | 0.205830  |

|   |           |           |           |
|---|-----------|-----------|-----------|
| C | 4.038849  | -2.644408 | 1.156921  |
| F | 4.837548  | -2.850404 | 2.215036  |
| C | 3.269102  | -1.491549 | 1.057635  |
| F | 3.402344  | -0.600688 | 2.069344  |
| C | 2.420614  | 1.554544  | -0.215491 |
| C | 3.808580  | 1.642007  | -0.364230 |
| F | 4.591745  | 0.546957  | -0.321605 |
| C | 4.489593  | 2.843041  | -0.573801 |
| F | 5.823902  | 2.853469  | -0.702902 |
| C | 3.780885  | 4.035051  | -0.655828 |
| F | 4.418739  | 5.194075  | -0.857782 |
| C | 2.395989  | 4.007115  | -0.526459 |
| F | 1.690882  | 5.146058  | -0.605441 |
| C | 1.763542  | 2.786920  | -0.315374 |
| F | 0.407215  | 2.845978  | -0.206648 |
| C | -0.534384 | -1.966012 | 1.598305  |
| F | -1.644348 | -2.550399 | 2.110375  |
| F | -0.285226 | -2.559626 | 0.411656  |
| F | 0.477725  | -2.271692 | 2.429563  |

## E7

E= -2791.512644au

|   |             |             |             |
|---|-------------|-------------|-------------|
| P | 1.86144900  | 0.12593000  | -0.16610100 |
| B | -1.46174500 | 0.05907700  | -0.08342200 |
| O | -0.64896800 | -0.04733300 | -1.40417000 |
| O | 1.13803600  | -0.02500700 | -2.75123800 |
| C | 0.75945200  | -0.33926400 | 1.29190300  |
| H | 0.47298200  | -1.38147000 | 1.14316700  |
| C | -0.49553000 | 0.55292000  | 1.13923800  |
| H | -0.19446600 | 1.60276000  | 1.08136300  |
| C | 0.60218700  | 0.01542800  | -1.66512900 |
| C | 3.21680900  | -1.01704500 | -0.70851600 |
| C | 3.25549000  | -2.38991300 | -0.34008400 |
| C | 4.34169300  | -3.16494000 | -0.76067100 |
| H | 4.36898000  | -4.21073500 | -0.46513900 |
| C | 5.36734100  | -2.66080900 | -1.55826000 |
| C | 5.26128200  | -1.33551400 | -1.97707500 |
| H | 6.01684900  | -0.93117800 | -2.64657200 |
| C | 4.20734300  | -0.49987200 | -1.59359500 |
| C | 2.17392000  | -3.12610100 | 0.42381500  |
| H | 1.19602500  | -3.01021900 | -0.05282500 |
| H | 2.10496500  | -2.81464100 | 1.46806600  |
| H | 2.39460000  | -4.19669000 | 0.42429600  |

|   |              |              |              |
|---|--------------|--------------|--------------|
| C | 6. 51058600  | -3. 53594600 | -2. 00943900 |
| H | 6. 27322800  | -4. 02640600 | -2. 96263900 |
| H | 6. 72276300  | -4. 32469100 | -1. 28061000 |
| H | 7. 42502800  | -2. 95345800 | -2. 16184800 |
| C | 4. 20544000  | 0. 88791900  | -2. 20547400 |
| H | 4. 59327000  | 1. 65229700  | -1. 52501200 |
| H | 3. 20729000  | 1. 18493800  | -2. 52965900 |
| H | 4. 84434100  | 0. 88559900  | -3. 09329000 |
| C | 2. 50260300  | 1. 83548000  | 0. 15553000  |
| C | 3. 64588200  | 1. 99050100  | 0. 98775900  |
| C | 4. 07763400  | 3. 28291100  | 1. 30251800  |
| H | 4. 94806500  | 3. 39016600  | 1. 94560200  |
| C | 3. 44141400  | 4. 42681700  | 0. 82367400  |
| C | 2. 34855300  | 4. 24875500  | -0. 02422500 |
| H | 1. 85110000  | 5. 12439300  | -0. 43298100 |
| C | 1. 86040100  | 2. 98744000  | -0. 38195100 |
| C | 4. 50795600  | 0. 86339100  | 1. 51944400  |
| H | 4. 99751300  | 1. 18065000  | 2. 44482700  |
| H | 5. 29594100  | 0. 61313000  | 0. 79870000  |
| H | 3. 97215100  | -0. 05651800 | 1. 73656300  |
| C | 3. 90705400  | 5. 80617000  | 1. 21861200  |
| H | 4. 97765200  | 5. 81861100  | 1. 44689100  |
| H | 3. 37682300  | 6. 15213000  | 2. 11561300  |
| H | 3. 71537000  | 6. 53632600  | 0. 42569700  |
| C | 0. 70841300  | 2. 97449200  | -1. 36489000 |
| H | 0. 40763300  | 4. 00099900  | -1. 58875100 |
| H | -0. 17692800 | 2. 45905400  | -0. 98859200 |
| H | 0. 98614100  | 2. 50231200  | -2. 31265800 |
| C | -2. 68181800 | 1. 08338100  | -0. 47201100 |
| C | -3. 48448000 | 0. 80242300  | -1. 58474600 |
| F | -3. 25660300 | -0. 30579000 | -2. 31479900 |
| C | -4. 54330600 | 1. 60776700  | -1. 99652600 |
| F | -5. 27335500 | 1. 28717400  | -3. 07457300 |
| C | -4. 84755500 | 2. 75643300  | -1. 27137800 |
| F | -5. 85999900 | 3. 54636400  | -1. 64902300 |
| C | -4. 08871700 | 3. 07431500  | -0. 15092700 |
| F | -4. 37215800 | 4. 17838800  | 0. 55750700  |
| C | -3. 03616100 | 2. 23986200  | 0. 22433500  |
| F | -2. 35536500 | 2. 62181100  | 1. 32915400  |
| C | -2. 07621000 | -1. 43087400 | 0. 26290100  |
| C | -3. 05454600 | -1. 54512600 | 1. 25687500  |
| F | -3. 44547700 | -0. 44519500 | 1. 93843500  |
| C | -3. 66569200 | -2. 74324700 | 1. 61594600  |

|   |              |              |              |
|---|--------------|--------------|--------------|
| F | -4. 59898100 | -2. 77869700 | 2. 57662700  |
| C | -3. 29289600 | -3. 91734600 | 0. 96703100  |
| F | -3. 86000400 | -5. 08332100 | 1. 29683700  |
| C | -2. 30914800 | -3. 86491800 | -0. 01368400 |
| F | -1. 91924500 | -4. 99232100 | -0. 62922500 |
| C | -1. 72875100 | -2. 63981200 | -0. 34094300 |
| F | -0. 74704100 | -2. 69452500 | -1. 27807800 |
| H | -0. 07350800 | -5. 20112900 | -3. 37602000 |
| H | -0. 39987900 | -4. 86569100 | -2. 79953400 |
| H | -1. 06754700 | 0. 47078300  | 2. 06807200  |
| C | 1. 33481200  | -0. 26432400 | 2. 70195700  |
| F | 0. 40977000  | -0. 67500300 | 3. 59058700  |
| F | 1. 71414800  | 0. 97751100  | 3. 05232200  |
| F | 2. 41423700  | -1. 07806700 | 2. 87501400  |

### TSE78

E= -2791.384007au

|   |              |              |              |
|---|--------------|--------------|--------------|
| P | 1. 97198200  | -0. 01540300 | -0. 18009500 |
| B | -1. 54109900 | -0. 08996600 | -0. 14390100 |
| O | -0. 78175100 | -0. 01851200 | -1. 56891600 |
| O | 0. 89279200  | -0. 46916100 | -3. 05120700 |
| C | 0. 84521000  | -0. 37532900 | 1. 31868700  |
| H | 0. 66170200  | -1. 45238200 | 1. 31779300  |
| C | -0. 47715800 | 0. 38466700  | 1. 02521800  |
| H | -0. 22628800 | 1. 44065000  | 0. 88745700  |
| H | -1. 04450500 | 0. 35907500  | 1. 95776200  |
| C | 0. 31689100  | -0. 49013000 | -1. 99263800 |
| C | 3. 43645800  | -1. 13925700 | -0. 49447700 |
| C | 3. 61818900  | -2. 41963700 | 0. 09494500  |
| C | 4. 74730000  | -3. 16907000 | -0. 25649600 |
| H | 4. 88608500  | -4. 13904300 | 0. 21510000  |
| C | 5. 68365100  | -2. 73480500 | -1. 19362000 |
| C | 5. 43485100  | -1. 51942000 | -1. 82947000 |
| H | 6. 11519500  | -1. 17846100 | -2. 60657500 |
| C | 4. 32567900  | -0. 72287400 | -1. 52717900 |
| C | 2. 65261100  | -3. 08748500 | 1. 05351000  |
| H | 1. 65608700  | -3. 20618400 | 0. 61141100  |
| H | 2. 54764700  | -2. 54940100 | 1. 99570000  |
| H | 3. 00666700  | -4. 09419700 | 1. 29062500  |
| C | 6. 87971400  | -3. 58015600 | -1. 55783900 |
| H | 6. 65053700  | -4. 24073200 | -2. 40449200 |
| H | 7. 18996900  | -4. 21623000 | -0. 72254700 |
| H | 7. 73319200  | -2. 96021100 | -1. 85148100 |

|   |             |             |             |
|---|-------------|-------------|-------------|
| C | 4.13993400  | 0.52467600  | -2.36923300 |
| H | 4.41170500  | 1.44137100  | -1.83728900 |
| H | 3.10871500  | 0.62711900  | -2.72020100 |
| H | 4.77234600  | 0.45829400  | -3.25922500 |
| C | 2.55917700  | 1.75546600  | -0.00970000 |
| C | 1.90069800  | 2.80660400  | -0.69751000 |
| C | 2.31640800  | 4.12325200  | -0.46863900 |
| H | 1.80043400  | 4.92316300  | -0.99365100 |
| C | 3.36613700  | 4.44125900  | 0.39148600  |
| C | 4.03688000  | 3.38469600  | 1.00734300  |
| H | 4.88351400  | 3.60137900  | 1.65457700  |
| C | 3.67366600  | 2.04583900  | 0.82569600  |
| C | 0.79375600  | 2.60788200  | -1.70552800 |
| H | 0.58957400  | 3.54923900  | -2.22314400 |
| H | -0.14242200 | 2.28340200  | -1.24525100 |
| H | 1.05547400  | 1.87035900  | -2.47014500 |
| C | 3.75986800  | 5.87448200  | 0.65056900  |
| H | 3.51851800  | 6.51728900  | -0.20207600 |
| H | 4.83116900  | 5.96610100  | 0.85775900  |
| H | 3.22378500  | 6.27284000  | 1.52206100  |
| C | 4.56586800  | 1.01885900  | 1.48963200  |
| H | 5.11682000  | 1.48614800  | 2.31098800  |
| H | 5.30236300  | 0.62809000  | 0.77762700  |
| H | 4.03078300  | 0.16573000  | 1.89801300  |
| C | -2.67163900 | 1.09053500  | -0.33883300 |
| C | -3.51401400 | 1.00710300  | -1.45785400 |
| F | -3.37383600 | -0.01709100 | -2.32298300 |
| C | -4.52117100 | 1.92184800  | -1.74970600 |
| F | -5.28133200 | 1.78393100  | -2.84504900 |
| C | -4.74324300 | 2.98525200  | -0.87987700 |
| F | -5.70450200 | 3.88002900  | -1.13501000 |
| C | -3.95518600 | 3.10354400  | 0.25783800  |
| F | -4.16258800 | 4.11854700  | 1.10989200  |
| C | -2.95347900 | 2.16433100  | 0.51102200  |
| F | -2.26203000 | 2.36916200  | 1.65331500  |
| C | -2.21530600 | -1.55765900 | 0.09355600  |
| C | -2.94243900 | -1.76789900 | 1.27263500  |
| F | -3.04182200 | -0.77700400 | 2.18684800  |
| C | -3.60541800 | -2.95247800 | 1.58019300  |
| F | -4.27889700 | -3.08286900 | 2.73071300  |
| C | -3.56845300 | -4.00729100 | 0.67293900  |
| F | -4.19298900 | -5.15776100 | 0.94647700  |
| C | -2.87141100 | -3.84994000 | -0.51943300 |

|   |             |             |             |
|---|-------------|-------------|-------------|
| F | -2.82568100 | -4.85612000 | -1.40331900 |
| C | -2.22571300 | -2.64258800 | -0.78680500 |
| F | -1.57677000 | -2.58546200 | -1.97251100 |
| H | 0.45354900  | -1.72782800 | -1.42138400 |
| H | 1.06241500  | -1.04312300 | -0.92538600 |
| C | 1.32204800  | -0.03672000 | 2.73019000  |
| F | 0.38524800  | -0.39524400 | 3.63276800  |
| F | 2.45587100  | -0.70157400 | 3.09147200  |
| F | 1.56824100  | 1.27417300  | 2.89673900  |

## E8

E= -2791.542659au

|   |             |             |             |
|---|-------------|-------------|-------------|
| P | -1.98238100 | 0.16475100  | -0.02095600 |
| B | 1.56177000  | 0.24936000  | 0.03314600  |
| O | 0.61510300  | 0.02870700  | 1.20431700  |
| O | 0.25022300  | -0.06481700 | 3.40791000  |
| C | -0.67951200 | -0.26431100 | -1.32798400 |
| H | -0.37007900 | -1.29034000 | -1.12334900 |
| C | 0.56055700  | 0.66072400  | -1.21884000 |
| H | 0.23977300  | 1.70231200  | -1.15887800 |
| C | 1.01082800  | -0.09387600 | 2.46333900  |
| C | -2.35876700 | -1.10206000 | 1.24955100  |
| C | -2.23236000 | -2.50039600 | 1.06903400  |
| C | -2.57785300 | -3.33851600 | 2.13407600  |
| H | -2.48332900 | -4.41252800 | 1.99329700  |
| C | -3.03026200 | -2.85264400 | 3.36069800  |
| C | -3.14345300 | -1.46987700 | 3.51184000  |
| H | -3.48603300 | -1.06432100 | 4.46045500  |
| C | -2.80821000 | -0.57768000 | 2.49259500  |
| C | -1.72232500 | -3.18277000 | -0.18181300 |
| H | -0.62742700 | -3.22581900 | -0.16366500 |
| H | -2.03516000 | -2.70458700 | -1.11097400 |
| H | -2.08014300 | -4.21583600 | -0.21461800 |
| C | -3.35929200 | -3.78782600 | 4.49790000  |
| H | -2.50950400 | -3.86876900 | 5.18801000  |
| H | -3.58719100 | -4.79581500 | 4.13723800  |
| H | -4.21541300 | -3.42796100 | 5.07858100  |
| C | -2.89103900 | 0.90052500  | 2.79952400  |
| H | -3.39798400 | 1.48144300  | 2.02175000  |
| H | -1.87743100 | 1.29430900  | 2.94511500  |
| H | -3.43933600 | 1.05986500  | 3.73182900  |
| C | -3.51488100 | 0.94930400  | -0.69104100 |
| C | -4.70760100 | 0.21722300  | -0.92512000 |

|   |             |             |             |
|---|-------------|-------------|-------------|
| C | -5.84381200 | 0.91037500  | -1.35633600 |
| H | -6.75334600 | 0.34393100  | -1.54048900 |
| C | -5.85117300 | 2.28954000  | -1.56346100 |
| C | -4.66157300 | 2.98621700  | -1.34281700 |
| H | -4.63591200 | 4.05909300  | -1.51711400 |
| C | -3.49052600 | 2.35500300  | -0.91638100 |
| C | -4.84657700 | -1.27726500 | -0.74225500 |
| H | -5.79404900 | -1.61588700 | -1.17059000 |
| H | -4.83691700 | -1.56389900 | 0.31347900  |
| H | -4.04876800 | -1.82749500 | -1.24471600 |
| C | -7.10361200 | 3.00937700  | -1.99915700 |
| H | -7.80752700 | 2.32959000  | -2.48915100 |
| H | -6.87494200 | 3.82513500  | -2.69309700 |
| H | -7.61947500 | 3.45202100  | -1.13683000 |
| C | -2.25892400 | 3.21952600  | -0.75199300 |
| H | -2.49261700 | 4.25450000  | -1.01469800 |
| H | -1.44922200 | 2.89288800  | -1.41072800 |
| H | -1.86789300 | 3.22977400  | 0.27125300  |
| C | 2.55521600  | 1.51451700  | 0.42520200  |
| C | 3.95062800  | 1.49483300  | 0.51798500  |
| F | 4.64942200  | 0.36283400  | 0.29829400  |
| C | 4.72271400  | 2.60689800  | 0.85869200  |
| F | 6.05871800  | 2.51413200  | 0.92129200  |
| C | 4.10123500  | 3.81493000  | 1.15030100  |
| F | 4.82447600  | 4.89081500  | 1.48282400  |
| C | 2.71291200  | 3.88735600  | 1.10087600  |
| F | 2.09010800  | 5.03983600  | 1.39324000  |
| C | 1.98735900  | 2.75212500  | 0.75366700  |
| F | 0.63494600  | 2.90739000  | 0.75859300  |
| C | 2.33538200  | -1.14566100 | -0.40358600 |
| C | 3.18642900  | -1.14455100 | -1.51593600 |
| F | 3.42716000  | 0.01657600  | -2.16641900 |
| C | 3.82803800  | -2.27096200 | -2.01709700 |
| F | 4.63651300  | -2.18799200 | -3.08343500 |
| C | 3.61920500  | -3.50236700 | -1.40010800 |
| F | 4.21784600  | -4.60515600 | -1.86684600 |
| C | 2.77311300  | -3.56941500 | -0.30152000 |
| F | 2.54113400  | -4.74976000 | 0.29542300  |
| C | 2.15698700  | -2.40667200 | 0.16730400  |
| F | 1.32984100  | -2.59059700 | 1.22880800  |
| H | -1.36142000 | 1.20515600  | 0.67323200  |
| H | 2.10115800  | -0.21870500 | 2.58659500  |
| H | 1.10788800  | 0.56467500  | -2.16128500 |

|   |             |             |             |
|---|-------------|-------------|-------------|
| C | -1.26786900 | -0.28025800 | -2.73424100 |
| F | -2.37014100 | -1.07857600 | -2.82148800 |
| F | -1.63531500 | 0.94476800  | -3.15963700 |
| F | -0.37129800 | -0.76428200 | -3.61145700 |

## TSE8

E= -2791.513647au

|   |             |             |             |
|---|-------------|-------------|-------------|
| P | -1.84183600 | -0.43143400 | -0.22210900 |
| B | 1.65463600  | -0.46856800 | 0.10013500  |
| O | 0.73614800  | -0.74574400 | -1.59752600 |
| O | 0.18633700  | -0.60696100 | -3.78050600 |
| C | -0.75803900 | -0.66804700 | 1.35288200  |
| H | -0.58109300 | 0.32577000  | 1.75818100  |
| C | 0.62114400  | -1.29709900 | 1.01139300  |
| H | 0.48802600  | -2.30969300 | 0.62033600  |
| C | 1.01404700  | -0.53147900 | -2.91202200 |
| C | -2.43529900 | 1.32829700  | -0.40566200 |
| C | -2.39033600 | 2.38366400  | 0.54336300  |
| C | -2.73880900 | 3.67847400  | 0.13687400  |
| H | -2.69118000 | 4.47776500  | 0.87375500  |
| C | -3.15634800 | 3.98056000  | -1.15844700 |
| C | -3.22884000 | 2.92773500  | -2.06955000 |
| H | -3.56224900 | 3.12672000  | -3.08555000 |
| C | -2.87282300 | 1.61888000  | -1.73085100 |
| C | -2.00491100 | 2.24266800  | 2.00296300  |
| H | -0.91715600 | 2.28567900  | 2.14787800  |
| H | -2.36687500 | 1.31995800  | 2.45730400  |
| H | -2.42508900 | 3.07441700  | 2.57642700  |
| C | -3.54862300 | 5.38629100  | -1.54517500 |
| H | -4.57188800 | 5.61609500  | -1.21923400 |
| H | -3.51071200 | 5.52749800  | -2.63002800 |
| H | -2.88749500 | 6.12724600  | -1.08261700 |
| C | -2.99171000 | 0.56702300  | -2.81552200 |
| H | -3.65466300 | -0.25536900 | -2.52456900 |
| H | -2.02226200 | 0.12949400  | -3.08000500 |
| H | -3.40448800 | 1.01395400  | -3.72487500 |
| C | -3.30375200 | -1.59081200 | -0.15964300 |
| C | -4.58798100 | -1.26240400 | 0.34490800  |
| C | -5.61423500 | -2.21230000 | 0.25216900  |
| H | -6.59501400 | -1.95057400 | 0.64335000  |
| C | -5.42734200 | -3.47238600 | -0.31319500 |
| C | -4.15872900 | -3.77615100 | -0.81072200 |
| H | -3.98485300 | -4.75010300 | -1.26307500 |



|   |             |             |             |
|---|-------------|-------------|-------------|
| C | -3.09952300 | -2.86740900 | -0.75264200 |
| C | -4.94867900 | 0.06528900  | 0.97259000  |
| H | -5.91514300 | -0.01389300 | 1.47969900  |
| H | -5.02926100 | 0.86279600  | 0.22663000  |
| H | -4.21226600 | 0.38197000  | 1.71115300  |
| C | -6.54759800 | -4.48308300 | -0.36624100 |
| H | -7.52731600 | -4.00050200 | -0.29040000 |
| H | -6.47023300 | -5.20083500 | 0.46131700  |
| H | -6.52263600 | -5.06034300 | -1.29714700 |
| C | -1.77263300 | -3.30930800 | -1.33390100 |
| H | -1.85739200 | -4.32206300 | -1.73916000 |
| H | -0.98327000 | -3.33048300 | -0.57516800 |
| H | -1.43727400 | -2.65534600 | -2.14658300 |
| C | 3.09002900  | -1.12430000 | -0.21482200 |
| C | 4.01186400  | -0.48668700 | -1.05617300 |
| F | 3.66486900  | 0.65502900  | -1.69430900 |
| C | 5.28791000  | -0.96966700 | -1.32619200 |
| F | 6.10991500  | -0.31231100 | -2.15253200 |
| C | 5.70355700  | -2.15546700 | -0.72642500 |
| F | 6.92303600  | -2.64022300 | -0.96735800 |
| C | 4.83112700  | -2.83325000 | 0.11825000  |
| F | 5.21809500  | -3.97515200 | 0.69781500  |
| C | 3.55688100  | -2.31722700 | 0.35279600  |
| F | 2.78381700  | -3.03965500 | 1.18389200  |
| C | 1.68717200  | 1.12789700  | 0.35452500  |
| C | 2.25163100  | 1.52824600  | 1.57126400  |
| F | 2.73046600  | 0.58589800  | 2.41461300  |
| C | 2.35681700  | 2.85418400  | 1.98056500  |
| F | 2.91207900  | 3.16855700  | 3.15682700  |
| C | 1.87600000  | 3.85810500  | 1.14354800  |
| F | 1.96122600  | 5.14028800  | 1.51059900  |
| C | 1.30608700  | 3.51298600  | -0.07775800 |
| F | 0.83918200  | 4.47031100  | -0.88738500 |
| C | 1.22644300  | 2.17101700  | -0.45050000 |
| F | 0.66566400  | 1.93127800  | -1.65365100 |
| H | -0.27640600 | -0.72467500 | -1.38156500 |
| H | 2.07416100  | -0.30201400 | -3.05980600 |
| H | 1.14037000  | -1.43190600 | 1.96866600  |
| C | -1.40722600 | -1.46616600 | 2.47556400  |
| F | -0.62480600 | -1.46485600 | 3.58139900  |
| F | -2.60512800 | -0.95933400 | 2.86119000  |
| F | -1.61013700 | -2.75694200 | 2.13790500  |

**F<sub>5</sub>**

**E= -2492.6203926au**

|   |           |           |           |
|---|-----------|-----------|-----------|
| C | -2.697326 | -2.974156 | -0.453818 |
| C | -2.283032 | -1.776374 | 0.188916  |
| C | -2.057585 | -1.816261 | 1.595998  |
| C | -2.278314 | -2.998162 | 2.309542  |
| C | -2.695175 | -4.175637 | 1.690081  |
| C | -2.894482 | -4.132609 | 0.312039  |
| P | -1.831527 | -0.118628 | -0.582458 |
| C | 3.746411  | 0.314935  | 3.262899  |
| O | 3.021995  | 0.131898  | 4.161937  |
| C | -1.569188 | -0.620871 | 2.387727  |
| C | -2.894860 | -5.449363 | 2.476412  |
| C | -2.948530 | -3.129463 | -1.940362 |
| C | -0.955681 | 0.849337  | -3.084383 |
| B | 1.272084  | 0.285462  | -1.675141 |
| O | 4.485663  | 0.484545  | 2.372188  |
| C | 2.025114  | -1.029651 | -1.207768 |
| C | 1.445806  | -2.300859 | -1.324335 |
| C | 2.092511  | -3.479618 | -0.968314 |
| C | 3.398365  | -3.418652 | -0.488631 |
| C | 4.031082  | -2.183862 | -0.369081 |
| C | 3.343673  | -1.027318 | -0.725264 |
| F | 0.184533  | -2.429699 | -1.780348 |
| F | 4.025618  | 0.125153  | -0.611136 |
| F | 5.289976  | -2.121209 | 0.077942  |
| F | 4.039904  | -4.537685 | -0.148226 |
| F | 1.478749  | -4.662452 | -1.086643 |
| C | 1.597308  | 1.645117  | -0.928236 |
| C | 1.836245  | 1.695744  | 0.452580  |
| C | 2.189717  | 2.850988  | 1.135186  |
| C | 2.321127  | 4.046041  | 0.431625  |
| C | 2.084432  | 4.059649  | -0.939133 |
| C | 1.721690  | 2.878666  | -1.585222 |
| F | 1.700676  | 0.581525  | 1.201786  |
| F | 2.402058  | 2.827378  | 2.459234  |
| F | 2.662578  | 5.167050  | 1.067583  |
| F | 2.206117  | 5.201709  | -1.625083 |
| F | 1.520161  | 2.979198  | -2.912487 |
| C | -3.225917 | 1.053363  | -0.072634 |
| C | -4.609055 | 0.767212  | -0.234798 |
| C | -5.561381 | 1.710186  | 0.169820  |
| C | -5.211660 | 2.939339  | 0.730245  |

|   |           |           |           |
|---|-----------|-----------|-----------|
| C | -3.853679 | 3.209687  | 0.885703  |
| C | -2.861353 | 2.299981  | 0.497631  |
| C | -5.139410 | -0.515811 | -0.833146 |
| C | -6.265826 | 3.944498  | 1.129076  |
| C | -1.424089 | 2.724430  | 0.708365  |
| H | -1.240157 | 1.019787  | -4.131408 |
| H | -2.110383 | -2.993589 | 3.384704  |
| H | -3.221783 | -5.035996 | -0.198842 |
| H | -3.548484 | 4.157672  | 1.324019  |
| H | -6.615041 | 1.469688  | 0.041576  |
| H | -1.423487 | -0.895534 | 3.436933  |
| H | -0.611763 | -0.249256 | 2.005028  |
| H | -2.278725 | 0.213454  | 2.361246  |
| H | -3.559289 | -2.326771 | -2.356611 |
| H | -2.010597 | -3.165747 | -2.505028 |
| H | -3.472907 | -4.070616 | -2.132069 |
| H | -3.567081 | -6.140112 | 1.956548  |
| H | -1.942580 | -5.974503 | 2.630714  |
| H | -3.315616 | -5.246900 | 3.467662  |
| H | -1.384163 | 3.656339  | 1.281591  |
| H | -0.845779 | 1.970116  | 1.247334  |
| H | -0.910327 | 2.900968  | -0.242655 |
| H | -7.160242 | 3.451515  | 1.525708  |
| H | -5.892475 | 4.636713  | 1.890994  |
| H | -6.584010 | 4.547431  | 0.267867  |
| H | -4.837472 | -1.394835 | -0.257734 |
| H | -6.232837 | -0.494400 | -0.868379 |
| H | -4.785960 | -0.664457 | -1.858913 |
| H | -0.986312 | 1.832958  | -2.599183 |
| C | 0.478093  | 0.268901  | -3.044854 |
| C | -2.003250 | -0.099255 | -2.463295 |
| H | 0.457790  | -0.737067 | -3.476453 |
| H | 1.097790  | 0.873090  | -3.725039 |
| H | -3.009926 | 0.218576  | -2.751065 |
| H | -1.840982 | -1.097579 | -2.865995 |

**TS<sub>F56</sub>**

**E= -2492.5814068au**

|   |          |           |           |
|---|----------|-----------|-----------|
| C | 3.399524 | -2.648177 | 0.611002  |
| C | 3.283975 | -1.401174 | -0.060084 |
| C | 4.130253 | -1.163673 | -1.179152 |
| C | 5.131746 | -2.089339 | -1.497173 |
| C | 5.317701 | -3.271710 | -0.784489 |

|   |           |           |           |
|---|-----------|-----------|-----------|
| C | 4.420038  | -3.535790 | 0.247997  |
| P | 1.938023  | -0.141202 | 0.332357  |
| C | 0.352262  | -0.938224 | -1.489503 |
| O | 1.072397  | -1.573360 | -2.167251 |
| C | 4.016870  | 0.030072  | -2.108293 |
| C | 6.395046  | -4.260167 | -1.162399 |
| C | 2.457313  | -3.146316 | 1.691334  |
| C | 0.303634  | 0.642394  | 2.438337  |
| B | -1.665160 | -0.125084 | 0.627113  |
| O | -0.687816 | -0.417946 | -1.175281 |
| C | -2.585062 | -1.436820 | 0.399417  |
| C | -2.030237 | -2.709897 | 0.239304  |
| C | -2.777918 | -3.875472 | 0.110571  |
| C | -4.167137 | -3.797186 | 0.162385  |
| C | -4.772981 | -2.558007 | 0.340768  |
| C | -3.982165 | -1.415416 | 0.454638  |
| F | -0.682277 | -2.858933 | 0.192248  |
| F | -4.643676 | -0.258075 | 0.652400  |
| F | -6.107360 | -2.471101 | 0.406720  |
| F | -4.908558 | -4.902939 | 0.049499  |
| F | -2.178880 | -5.061912 | -0.053047 |
| C | -2.299984 | 1.276629  | 0.151128  |
| C | -2.930046 | 1.422775  | -1.097720 |
| C | -3.500424 | 2.610752  | -1.542314 |
| C | -3.500329 | 3.726537  | -0.709667 |
| C | -2.935161 | 3.626621  | 0.555016  |
| C | -2.362143 | 2.420712  | 0.958366  |
| F | -3.030517 | 0.380230  | -1.937970 |
| F | -4.068058 | 2.684679  | -2.752765 |
| F | -4.049478 | 4.873094  | -1.117789 |
| F | -2.949473 | 4.681163  | 1.381147  |
| F | -1.885462 | 2.413957  | 2.220410  |
| C | 2.807569  | 1.535144  | 0.229762  |
| C | 4.039198  | 1.787971  | 0.893022  |
| C | 4.570401  | 3.084722  | 0.871415  |
| C | 3.947366  | 4.144535  | 0.213126  |
| C | 2.757781  | 3.870815  | -0.461759 |
| C | 2.181648  | 2.595435  | -0.472221 |
| C | 4.897050  | 0.737291  | 1.573684  |
| C | 4.528361  | 5.537928  | 0.243345  |
| C | 0.919488  | 2.415907  | -1.285896 |
| H | 0.229586  | 0.849137  | 3.513719  |
| H | 5.776774  | -1.878549 | -2.347958 |

|   |           |           |           |   |           |           |           |
|---|-----------|-----------|-----------|---|-----------|-----------|-----------|
| H | 4.498339  | -4.478210 | 0.786760  | C | -0.271731 | 0.568699  | -2.380668 |
| H | 2.258347  | 4.671529  | -1.003077 | B | 1.613577  | -0.159695 | -0.523819 |
| H | 5.512442  | 3.264394  | 1.385888  | O | 0.548929  | -0.414944 | 0.620930  |
| H | 4.496883  | -0.206611 | -3.063023 | C | 2.675577  | -1.401703 | -0.351182 |
| H | 2.977771  | 0.288622  | -2.328466 | C | 2.244607  | -2.709337 | -0.114838 |
| H | 4.500236  | 0.926725  | -1.708218 | C | 3.097070  | -3.804973 | -0.008892 |
| H | 2.698163  | -2.743677 | 2.682653  | C | 4.467087  | -3.617061 | -0.160910 |
| H | 1.410226  | -2.919535 | 1.473754  | C | 4.949653  | -2.339629 | -0.422622 |
| H | 2.535196  | -4.234987 | 1.768326  | C | 4.056368  | -1.272856 | -0.516415 |
| H | 6.790396  | -4.778472 | -0.281896 | F | 0.920171  | -2.985351 | 0.008788  |
| H | 6.007025  | -5.028985 | -1.843991 | F | 4.604905  | -0.070990 | -0.797498 |
| H | 7.230554  | -3.766784 | -1.670048 | F | 6.266630  | -2.145598 | -0.587634 |
| H | 0.586358  | 3.377862  | -1.687180 | F | 5.308348  | -4.655410 | -0.069027 |
| H | 1.081354  | 1.747370  | -2.140901 | F | 2.610820  | -5.034495 | 0.224580  |
| H | 0.096894  | 1.996419  | -0.704503 | C | 2.264067  | 1.285416  | -0.073696 |
| H | 5.611271  | 5.517859  | 0.404272  | C | 2.758831  | 1.448527  | 1.228093  |
| H | 4.332421  | 6.074527  | -0.691292 | C | 3.324517  | 2.629033  | 1.702023  |
| H | 4.088175  | 6.131318  | 1.055882  | C | 3.430844  | 3.725461  | 0.851080  |
| H | 5.544356  | 0.237033  | 0.843415  | C | 2.970649  | 3.614594  | -0.454736 |
| H | 5.544930  | 1.209347  | 2.319261  | C | 2.407817  | 2.412397  | -0.885806 |
| H | 4.332846  | -0.052549 | 2.068981  | F | 2.718931  | 0.421903  | 2.097437  |
| H | 0.299401  | 1.619742  | 1.947836  | F | 3.774294  | 2.719250  | 2.962395  |
| C | -0.877031 | -0.236523 | 1.997440  | F | 3.968888  | 4.871769  | 1.286610  |
| C | 1.629959  | -0.074358 | 2.188936  | F | 3.066386  | 4.662018  | -1.289463 |
| H | -0.632240 | -1.284392 | 2.207346  | F | 2.000576  | 2.404490  | -2.177747 |
| H | -1.734398 | -0.024861 | 2.662039  | C | -2.932164 | 1.469054  | -0.263266 |
| H | 2.455439  | 0.461656  | 2.660606  | C | -4.153445 | 1.645455  | -0.972597 |
| H | 1.584303  | -1.071460 | 2.619516  | C | -4.727566 | 2.920501  | -1.016171 |
|   |           |           |           | C | -4.153824 | 4.025056  | -0.386685 |
|   |           |           |           | C | -2.964171 | 3.823132  | 0.312062  |
|   |           |           |           | C | -2.332587 | 2.576414  | 0.392063  |
|   |           |           |           | C | -4.947701 | 0.539165  | -1.644273 |
|   |           |           |           | C | -4.781748 | 5.394180  | -0.478335 |
|   |           |           |           | C | -1.053409 | 2.513140  | 1.196656  |
|   |           |           |           | H | -0.273224 | 0.808590  | -3.452053 |
|   |           |           |           | H | -5.914376 | -2.097567 | 2.253277  |
|   |           |           |           | H | -4.119127 | -4.773055 | -0.548367 |
|   |           |           |           | H | -2.498642 | 4.666125  | 0.816581  |
|   |           |           |           | H | -5.660872 | 3.046896  | -1.560123 |
|   |           |           |           | H | -4.901105 | -0.250193 | 2.919846  |
|   |           |           |           | H | -3.337372 | 0.292373  | 2.318933  |
|   |           |           |           | H | -4.828974 | 0.794259  | 1.500849  |
|   |           |           |           | H | -2.355534 | -3.045231 | -2.439132 |

## F<sub>6</sub>

E= -2492.6043251au

|   |           |           |           |   |           |           |           |
|---|-----------|-----------|-----------|---|-----------|-----------|-----------|
| C | -3.229145 | -2.829972 | -0.447457 | C | -4.947701 | 0.539165  | -1.644273 |
| C | -3.304969 | -1.537708 | 0.136920  | C | -4.781748 | 5.394180  | -0.478335 |
| C | -4.260861 | -1.292272 | 1.164219  | C | -1.053409 | 2.513140  | 1.196656  |
| C | -5.187468 | -2.294279 | 1.468676  | H | -0.273224 | 0.808590  | -3.452053 |
| C | -5.195085 | -3.537184 | 0.834555  | H | -5.914376 | -2.097567 | 2.253277  |
| C | -4.186951 | -3.787565 | -0.093683 | H | -4.119127 | -4.773055 | -0.548367 |
| P | -2.117044 | -0.198110 | -0.351298 | H | -2.498642 | 4.666125  | 0.816581  |
| C | -0.668589 | -0.445345 | 0.960674  | H | -5.660872 | 3.046896  | -1.560123 |
| O | -1.140191 | -0.643665 | 2.064435  | H | -4.901105 | -0.250193 | 2.919846  |
| C | -4.331157 | -0.036287 | 2.010917  | H | -3.337372 | 0.292373  | 2.318933  |
| C | -6.236581 | -4.577694 | 1.164558  | H | -4.828974 | 0.794259  | 1.500849  |
| C | -2.143323 | -3.304203 | -1.394647 | H | -2.355534 | -3.045231 | -2.439132 |

|   |           |           |           |
|---|-----------|-----------|-----------|
| H | -1.151435 | -2.927344 | -1.134478 |
| H | -2.080589 | -4.395135 | -1.350894 |
| H | -5.877070 | -5.588224 | 0.946200  |
| H | -6.522674 | -4.536816 | 2.220830  |
| H | -7.149040 | -4.419407 | 0.574339  |
| H | -0.785008 | 3.513898  | 1.544845  |
| H | -1.154090 | 1.871881  | 2.077361  |
| H | -0.205423 | 2.140959  | 0.615139  |
| H | -5.854707 | 5.331128  | -0.685497 |
| H | -4.644005 | 5.959698  | 0.449196  |
| H | -4.324609 | 5.980090  | -1.286503 |
| H | -5.572124 | 0.007430  | -0.916951 |
| H | -5.613765 | 0.969491  | -2.397740 |
| H | -4.340524 | -0.220063 | -2.140766 |
| H | -0.299751 | 1.538828  | -1.871700 |
| C | 0.991935  | -0.239112 | -2.022591 |
| C | -1.578813 | -0.213849 | -2.135631 |
| H | 0.802701  | -1.293004 | -2.276387 |
| H | 1.798107  | 0.068475  | -2.698597 |
| H | -2.403709 | 0.244159  | -2.687574 |
| H | -1.461126 | -1.232683 | -2.495307 |

## G5

E= -2531.9269925au

|   |           |           |           |
|---|-----------|-----------|-----------|
| C | 4.643415  | 0.286798  | -2.311229 |
| C | 3.982911  | 0.343008  | -1.056084 |
| C | 4.421270  | 1.321407  | -0.115218 |
| C | 5.493707  | 2.162776  | -0.422283 |
| C | 6.157906  | 2.104806  | -1.647714 |
| C | 5.704986  | 1.166133  | -2.571966 |
| P | 2.449063  | -0.582939 | -0.490725 |
| C | 0.918014  | 3.796578  | 2.061989  |
| O | 1.599129  | 4.607944  | 1.569356  |
| C | 3.767117  | 1.507515  | 1.238106  |
| C | 7.317970  | 3.022102  | -1.953755 |
| C | 4.307854  | -0.683479 | -3.426331 |
| C | 0.889178  | -1.373706 | -2.838186 |
| C | -0.580811 | -1.226034 | -2.396353 |
| B | -2.294136 | 0.191583  | -0.905716 |
| O | 0.248782  | 2.982314  | 2.571330  |
| C | -2.798985 | 1.565951  | -0.327142 |
| C | -1.931818 | 2.635648  | -0.039231 |
| C | -2.360719 | 3.843445  | 0.498610  |

|   |           |           |           |
|---|-----------|-----------|-----------|
| C | -3.715120 | 4.038690  | 0.754719  |
| C | -4.621896 | 3.020365  | 0.471894  |
| C | -4.156210 | 1.816397  | -0.047898 |
| F | -0.610376 | 2.524226  | -0.251788 |
| F | -5.090815 | 0.889158  | -0.303438 |
| F | -5.924961 | 3.206682  | 0.703740  |
| F | -4.141055 | 5.193343  | 1.262140  |
| F | -1.483134 | 4.818160  | 0.776192  |
| C | -3.189138 | -1.099145 | -0.686057 |
| C | -3.308607 | -1.697196 | 0.565542  |
| C | -4.057484 | -2.850914 | 0.781235  |
| C | -4.731957 | -3.430226 | -0.291934 |
| C | -4.642390 | -2.858809 | -1.560668 |
| C | -3.872171 | -1.712860 | -1.732516 |
| F | -2.657218 | -1.156438 | 1.617740  |
| F | -4.135886 | -3.403229 | 1.997330  |
| F | -5.460807 | -4.534225 | -0.106049 |
| F | -5.292639 | -3.412661 | -2.590595 |
| F | -3.806393 | -1.169561 | -2.966425 |
| C | 3.018373  | -1.719434 | 0.898457  |
| C | 4.218268  | -2.474695 | 0.909994  |
| C | 4.514989  | -3.279567 | 2.017104  |
| C | 3.667293  | -3.375910 | 3.121538  |
| C | 2.480398  | -2.643478 | 3.090391  |
| C | 2.140147  | -1.819353 | 2.010765  |
| C | 5.214985  | -2.473894 | -0.227569 |
| C | 4.030578  | -4.228827 | 4.314207  |
| C | 0.816127  | -1.083370 | 2.089773  |
| H | -1.215002 | -1.243546 | -3.291287 |
| H | 1.229687  | -0.420787 | -3.265412 |
| H | 5.806470  | 2.896022  | 0.318841  |
| H | 6.197409  | 1.104667  | -3.540489 |
| H | 1.793235  | -2.712194 | 3.931408  |
| H | 5.438448  | -3.855877 | 2.007619  |
| H | 4.142017  | 2.415835  | 1.719910  |
| H | 2.677670  | 1.592001  | 1.146053  |
| H | 3.960239  | 0.664631  | 1.911598  |
| H | 4.521851  | -1.721873 | -3.149613 |
| H | 3.260807  | -0.634464 | -3.733428 |
| H | 4.913664  | -0.458796 | -4.309395 |
| H | 7.606682  | 2.963853  | -3.008168 |
| H | 7.072723  | 4.066960  | -1.728531 |
| H | 8.200646  | 2.763803  | -1.353986 |

|   |           |           |           |
|---|-----------|-----------|-----------|
| H | 0.333713  | -1.273106 | 3.053870  |
| H | 0.934009  | -0.000403 | 1.979480  |
| H | 0.114159  | -1.405124 | 1.311717  |
| H | 3.137909  | -4.586462 | 4.838408  |
| H | 4.623619  | -5.101062 | 4.018367  |
| H | 4.628617  | -3.661455 | 5.040186  |
| H | 5.752901  | -1.523583 | -0.302508 |
| H | 5.954746  | -3.268078 | -0.085011 |
| H | 4.731401  | -2.643789 | -1.193819 |
| H | -0.863164 | -2.113797 | -1.814093 |
| H | 0.920714  | -2.099136 | -3.662429 |
| C | -0.894609 | 0.051242  | -1.596738 |
| C | 1.871376  | -1.873793 | -1.750332 |
| H | -0.181997 | 0.134618  | -0.752228 |
| H | -0.656354 | 0.940374  | -2.196959 |
| H | 1.352970  | -2.607826 | -1.119445 |
| H | 2.701528  | -2.415405 | -2.207037 |

### TSG56

E= -2531.8653487au

|   |           |           |           |
|---|-----------|-----------|-----------|
| C | -3.359853 | -2.315438 | -1.096675 |
| C | -3.250028 | -1.210501 | -0.210899 |
| C | -4.074363 | -1.202094 | 0.947741  |
| C | -5.048227 | -2.196563 | 1.107948  |
| C | -5.235244 | -3.227522 | 0.189982  |
| C | -4.354473 | -3.278869 | -0.888519 |
| P | -1.929447 | 0.134290  | -0.477272 |
| C | -0.516036 | -0.916804 | 1.357538  |
| O | -1.284542 | -1.658558 | 1.840693  |
| C | -3.989052 | -0.200637 | 2.086490  |
| C | -6.324793 | -4.256999 | 0.369738  |
| C | -2.419997 | -2.582578 | -2.256225 |
| C | -0.931246 | 0.408500  | -3.334872 |
| C | 0.401517  | 0.747138  | -2.675312 |
| B | 1.666358  | -0.240205 | -0.474102 |
| O | 0.525328  | -0.320382 | 1.252518  |
| C | 2.460602  | -1.570270 | 0.019011  |
| C | 1.836302  | -2.824188 | 0.060236  |
| C | 2.472449  | -4.008472 | 0.412510  |
| C | 3.825600  | -3.977797 | 0.740080  |
| C | 4.500797  | -2.763868 | 0.715170  |
| C | 3.818242  | -1.597331 | 0.365545  |
| F | 0.514527  | -2.929249 | -0.225322 |

|   |           |           |           |
|---|-----------|-----------|-----------|
| F | 4.565017  | -0.477552 | 0.368038  |
| F | 5.801814  | -2.718785 | 1.026702  |
| F | 4.462977  | -5.102027 | 1.076163  |
| F | 1.803325  | -5.167591 | 0.438178  |
| C | 2.449195  | 1.156779  | -0.228968 |
| C | 2.593604  | 1.894190  | 0.953653  |
| C | 3.344634  | 3.066434  | 1.044278  |
| C | 4.050837  | 3.527848  | -0.059326 |
| C | 3.992314  | 2.802096  | -1.243597 |
| C | 3.217501  | 1.648251  | -1.295228 |
| F | 1.997982  | 1.520760  | 2.100581  |
| F | 3.401549  | 3.740730  | 2.200865  |
| F | 4.781744  | 4.643464  | 0.018801  |
| F | 4.692101  | 3.202445  | -2.313132 |
| F | 3.282026  | 0.958448  | -2.456543 |
| C | -2.857011 | 1.724457  | 0.063402  |
| C | -4.195137 | 2.018483  | -0.320426 |
| C | -4.761525 | 3.246319  | 0.056980  |
| C | -4.073607 | 4.207839  | 0.791816  |
| C | -2.757292 | 3.913920  | 1.144643  |
| C | -2.142350 | 2.706732  | 0.796920  |
| C | -5.140080 | 1.105576  | -1.083053 |
| C | -4.712965 | 5.520909  | 1.175679  |
| C | -0.713503 | 2.524577  | 1.246583  |
| H | 1.149641  | 0.991377  | -3.433231 |
| H | -0.883790 | -0.607022 | -3.745404 |
| H | -5.670868 | -2.165066 | 2.000312  |
| H | -4.420999 | -4.110852 | -1.586883 |
| H | -2.179957 | 4.646314  | 1.705328  |
| H | -5.787384 | 3.450369  | -0.244014 |
| H | -4.271005 | -0.696456 | 3.021153  |
| H | -2.991746 | 0.213721  | 2.229328  |
| H | -4.669504 | 0.645825  | 1.944202  |
| H | -2.644578 | -1.984322 | -3.145342 |
| H | -1.375294 | -2.405224 | -1.989660 |
| H | -2.493328 | -3.632691 | -2.554258 |
| H | -6.041262 | -5.221592 | -0.064812 |
| H | -6.555444 | -4.415965 | 1.428602  |
| H | -7.254922 | -3.940246 | -0.121367 |
| H | -0.293403 | 3.478368  | 1.579969  |
| H | -0.626205 | 1.828034  | 2.086021  |
| H | -0.072510 | 2.144303  | 0.448919  |
| H | -4.184144 | 6.369119  | 0.723005  |

|   |           |           |           |
|---|-----------|-----------|-----------|
| H | -5.757511 | 5.567541  | 0.852093  |
| H | -4.690331 | 5.672706  | 2.261798  |
| H | -5.749290 | 0.511113  | -0.391947 |
| H | -5.827377 | 1.710039  | -1.684403 |
| H | -4.650280 | 0.398369  | -1.746538 |
| H | 0.284688  | 1.655210  | -2.067357 |
| H | -1.127160 | 1.074639  | -4.186253 |
| C | 0.891390  | -0.446482 | -1.832178 |
| C | -2.103218 | 0.570678  | -2.364608 |
| H | 0.087213  | -1.168916 | -1.690215 |
| H | 1.622536  | -1.007342 | -2.435456 |
| H | -2.347238 | 1.633989  | -2.317897 |
| H | -2.992363 | 0.061165  | -2.737131 |

## G<sub>6</sub>

E= -2531.9099149au

|   |           |           |           |
|---|-----------|-----------|-----------|
| C | -2.618828 | 2.044444  | 1.834660  |
| C | -2.211544 | 1.449040  | 0.612650  |
| C | -1.607844 | 2.255556  | -0.390996 |
| C | -1.272969 | 3.572267  | -0.071973 |
| C | -1.514148 | 4.128614  | 1.185957  |
| C | -2.239927 | 3.364392  | 2.099526  |
| P | -2.322667 | -0.377943 | 0.374947  |
| C | -0.919142 | -0.957204 | -0.902868 |
| O | -1.376667 | -1.489194 | -1.893275 |
| C | -1.343706 | 1.811611  | -1.815950 |
| C | -1.017428 | 5.512902  | 1.515414  |
| C | -3.531562 | 1.383834  | 2.853182  |
| C | -0.766388 | -2.141745 | 2.118155  |
| C | 0.460568  | -1.415136 | 2.690020  |
| B | 1.416614  | -0.293977 | 0.415780  |
| O | 0.290910  | -0.696732 | -0.630461 |
| C | 2.003767  | 1.092607  | -0.263028 |
| C | 1.939301  | 2.371355  | 0.295367  |
| C | 2.417395  | 3.518243  | -0.338351 |
| C | 3.004885  | 3.420741  | -1.592994 |
| C | 3.101316  | 2.169713  | -2.195030 |
| C | 2.604107  | 1.050725  | -1.529272 |
| F | 1.379537  | 2.586983  | 1.507088  |
| F | 2.725023  | -0.121060 | -2.181602 |
| F | 3.664317  | 2.055591  | -3.407049 |
| F | 3.463086  | 4.513917  | -2.216714 |
| F | 2.292468  | 4.724423  | 0.250141  |

|   |           |           |           |
|---|-----------|-----------|-----------|
| C | 2.536729  | -1.496498 | 0.337127  |
| C | 2.312418  | -2.806765 | -0.090728 |
| C | 3.299672  | -3.791924 | -0.111379 |
| C | 4.584056  | -3.487244 | 0.324583  |
| C | 4.855205  | -2.202850 | 0.785187  |
| C | 3.837527  | -1.252360 | 0.786817  |
| F | 1.084640  | -3.213252 | -0.498437 |
| F | 3.017506  | -5.033526 | -0.537054 |
| F | 5.543661  | -4.422272 | 0.315841  |
| F | 6.085093  | -1.895541 | 1.225097  |
| F | 4.163589  | -0.030014 | 1.267541  |
| C | -3.946620 | -0.992762 | -0.277001 |
| C | -4.999476 | -0.127344 | -0.688818 |
| C | -6.199194 | -0.694945 | -1.136802 |
| C | -6.407943 | -2.069917 | -1.212313 |
| C | -5.352945 | -2.899706 | -0.835917 |
| C | -4.130212 | -2.404979 | -0.374334 |
| C | -4.952391 | 1.388416  | -0.712258 |
| C | -7.724474 | -2.641397 | -1.677479 |
| C | -3.087236 | -3.446361 | -0.020827 |
| H | 1.295727  | -2.125864 | 2.711532  |
| H | -0.790826 | 4.180279  | -0.834047 |
| H | -2.532644 | 3.807234  | 3.049350  |
| H | -5.474850 | -3.977564 | -0.911409 |
| H | -6.996891 | -0.025508 | -1.448628 |
| H | -1.464236 | 2.668812  | -2.485875 |
| H | -0.321851 | 1.441504  | -1.944458 |
| H | -2.022946 | 1.029579  | -2.162915 |
| H | -4.055507 | 0.508854  | 2.459343  |
| H | -3.000204 | 1.081283  | 3.763559  |
| H | -4.297883 | 2.102497  | 3.163701  |
| H | -1.327009 | 5.828512  | 2.516120  |
| H | 0.077873  | 5.529732  | 1.471177  |
| H | -1.383234 | 6.253365  | 0.793865  |
| H | -2.974929 | -3.580241 | 1.060712  |
| H | -3.389393 | -4.415492 | -0.426757 |
| H | -2.108280 | -3.218793 | -0.444118 |
| H | -7.577178 | -3.545043 | -2.278457 |
| H | -8.355033 | -2.919551 | -0.822617 |
| H | -8.285758 | -1.918714 | -2.277933 |
| H | -4.136722 | 1.773163  | -1.328764 |
| H | -5.885872 | 1.770770  | -1.134088 |
| H | -4.839507 | 1.827690  | 0.281809  |

|   |           |           |          |
|---|-----------|-----------|----------|
| H | -1.032783 | -2.973036 | 2.783860 |
| C | 0.877369  | -0.137230 | 1.940558 |
| C | -2.007315 | -1.221729 | 2.022382 |
| H | 0.071412  | 0.604771  | 2.009196 |
| H | 1.702320  | 0.314682  | 2.506830 |
| H | -2.930620 | -1.761774 | 2.246415 |
| H | -1.913472 | -0.433366 | 2.767784 |
| H | 0.246063  | -1.167779 | 3.741335 |
| H | -0.521186 | -2.599000 | 1.156994 |

## H<sub>5</sub>

E= -2571.2391624au

|   |           |           |           |
|---|-----------|-----------|-----------|
| C | 2.839991  | 2.404641  | -1.031268 |
| C | 2.470456  | 1.226670  | -0.327499 |
| C | 1.997532  | 1.369465  | 1.011055  |
| C | 1.900458  | 2.638787  | 1.590360  |
| C | 2.224518  | 3.803410  | 0.893545  |
| C | 2.696576  | 3.654032  | -0.410001 |
| P | 2.294609  | -0.529367 | -0.971381 |
| C | -1.406333 | -2.403116 | 3.382504  |
| O | -0.324629 | -2.842784 | 3.318364  |
| C | 1.579952  | 0.186381  | 1.860553  |
| C | 2.042729  | 5.169177  | 1.513375  |
| C | 3.429850  | 2.424505  | -2.426785 |
| C | 1.666141  | -0.317843 | -3.841900 |
| C | -0.606959 | -1.155432 | -2.787831 |
| B | -2.018169 | 0.398356  | -1.179076 |
| O | -2.485213 | -1.959845 | 3.467833  |
| C | -1.986227 | 1.685221  | -0.280112 |
| C | -1.539738 | 2.927384  | -0.770119 |
| C | -1.416903 | 4.060754  | 0.024109  |
| C | -1.741779 | 3.985471  | 1.375338  |
| C | -2.199338 | 2.786040  | 1.913260  |
| C | -2.321817 | 1.672597  | 1.087324  |
| F | -1.228759 | 3.076878  | -2.066146 |
| F | -2.745932 | 0.547727  | 1.681075  |
| F | -2.505366 | 2.711682  | 3.212507  |
| F | -1.600831 | 5.059619  | 2.151921  |
| F | -0.972370 | 5.215372  | -0.485303 |
| C | -2.972317 | -0.812470 | -0.794145 |
| C | -2.571392 | -1.853291 | 0.034812  |
| C | -3.385302 | -2.937831 | 0.337714  |
| C | -4.664050 | -2.999438 | -0.213890 |

|   |           |           |           |
|---|-----------|-----------|-----------|
| C | -5.104142 | -1.979663 | -1.055582 |
| C | -4.252989 | -0.910929 | -1.328388 |
| F | -1.337028 | -1.811309 | 0.593102  |
| F | -2.956518 | -3.910413 | 1.153978  |
| F | -5.464219 | -4.032803 | 0.062681  |
| F | -6.329525 | -2.034817 | -1.589523 |
| F | -4.696672 | 0.066454  | -2.147916 |
| C | 3.660748  | -1.560450 | -0.189874 |
| C | 4.997750  | -1.149747 | 0.043075  |
| C | 5.888963  | -2.028317 | 0.671696  |
| C | 5.519294  | -3.314927 | 1.066303  |
| C | 4.207705  | -3.716026 | 0.812748  |
| C | 3.274312  | -2.871473 | 0.199819  |
| C | 5.539674  | 0.198229  | -0.375758 |
| C | 6.512937  | -4.249248 | 1.715761  |
| C | 1.879617  | -3.424640 | -0.025363 |
| H | 1.550453  | 2.714405  | 2.618327  |
| H | 2.980073  | 4.543125  | -0.969922 |
| H | 3.893149  | -4.715418 | 1.106621  |
| H | 6.909041  | -1.693195 | 0.850915  |
| H | 0.773727  | -0.386194 | 1.386764  |
| H | 2.404350  | -0.514877 | 2.029886  |
| H | 1.228185  | 0.525972  | 2.840067  |
| H | 4.342532  | 1.825009  | -2.493344 |
| H | 2.739567  | 2.054151  | -3.188840 |
| H | 3.695105  | 3.448851  | -2.705198 |
| H | 1.032951  | 5.556815  | 1.325602  |
| H | 2.183699  | 5.139297  | 2.599291  |
| H | 2.750089  | 5.895213  | 1.098346  |
| H | 1.605490  | -3.435812 | -1.087156 |
| H | 1.821342  | -4.455882 | 0.337826  |
| H | 1.110289  | -2.842797 | 0.491717  |
| H | 7.092098  | -4.800159 | 0.962221  |
| H | 7.229885  | -3.702902 | 2.338345  |
| H | 6.011719  | -4.991165 | 2.346407  |
| H | 5.022115  | 1.028109  | 0.113188  |
| H | 6.604311  | 0.273186  | -0.133259 |
| H | 5.441582  | 0.347843  | -1.456738 |
| C | -1.123324 | 0.263923  | -2.467313 |
| C | 2.744048  | -0.706351 | -2.803434 |
| H | -0.288422 | 0.966729  | -2.406527 |
| H | -1.736746 | 0.630599  | -3.312364 |
| C | 0.409493  | -1.207476 | -3.946087 |

|   |           |           |           |
|---|-----------|-----------|-----------|
| H | -0.152350 | -1.581082 | -1.888073 |
| H | -1.453481 | -1.804201 | -3.048482 |
| H | 0.725241  | -2.251650 | -4.085519 |
| H | -0.109362 | -0.924044 | -4.873529 |
| H | 2.156365  | -0.342202 | -4.825213 |
| H | 1.357283  | 0.724080  | -3.701998 |
| H | 3.690138  | -0.220036 | -3.054687 |
| H | 2.934204  | -1.785646 | -2.883554 |

**TS<sub>H56</sub>**

**E= -2571.1884628au**

|   |           |           |           |
|---|-----------|-----------|-----------|
| C | -1.880913 | 2.251070  | 1.358022  |
| C | -1.949321 | 1.265890  | 0.332085  |
| C | -1.883660 | 1.712380  | -1.019923 |
| C | -1.703502 | 3.073694  | -1.298480 |
| C | -1.584123 | 4.036985  | -0.301581 |
| C | -1.697754 | 3.596075  | 1.016155  |
| P | -2.043407 | -0.607028 | 0.571240  |
| C | -0.549244 | -1.549974 | -1.258346 |
| O | -1.205528 | -2.347576 | -1.821585 |
| C | -2.040109 | 0.834076  | -2.249171 |
| C | -1.327283 | 5.488576  | -0.625336 |
| C | -2.012031 | 1.986429  | 2.842616  |
| C | -1.523816 | -1.287671 | 3.565193  |
| C | 0.459963  | -2.182665 | 2.177423  |
| B | 1.563658  | -0.368474 | 0.523864  |
| O | 0.417923  | -0.842449 | -1.135122 |
| C | 1.755436  | 1.162970  | 0.084558  |
| C | 1.541150  | 2.250276  | 0.936479  |
| C | 1.722555  | 3.576586  | 0.553143  |
| C | 2.146454  | 3.864138  | -0.736888 |
| C | 2.400712  | 2.820045  | -1.620984 |
| C | 2.216028  | 1.508209  | -1.195602 |
| F | 1.144161  | 2.065579  | 2.213655  |
| F | 2.503146  | 0.551286  | -2.095019 |
| F | 2.819146  | 3.085329  | -2.865652 |
| F | 2.282615  | 5.136885  | -1.130616 |
| F | 1.453222  | 4.577474  | 1.404890  |
| C | 2.800076  | -1.341493 | 0.133680  |
| C | 2.695000  | -2.660806 | -0.317165 |
| C | 3.792793  | -3.473053 | -0.592847 |
| C | 5.078131  | -2.979502 | -0.395058 |
| C | 5.240248  | -1.681859 | 0.078345  |

|   |           |           |           |
|---|-----------|-----------|-----------|
| C | 4.114568  | -0.901008 | 0.329188  |
| F | 1.486149  | -3.234878 | -0.512259 |
| F | 3.619159  | -4.726081 | -1.033919 |
| F | 6.143211  | -3.747808 | -0.643906 |
| F | 6.469840  | -1.195975 | 0.292689  |
| F | 4.349821  | 0.337667  | 0.812294  |
| C | -3.756649 | -1.136984 | -0.073747 |
| C | -4.870206 | -0.276993 | -0.286148 |
| C | -6.024950 | -0.788868 | -0.893861 |
| C | -6.154812 | -2.123775 | -1.273394 |
| C | -5.095698 | -2.975273 | -0.968974 |
| C | -3.919762 | -2.521421 | -0.360983 |
| C | -4.955026 | 1.173091  | 0.151231  |
| C | -7.414817 | -2.639915 | -1.926922 |
| C | -2.945640 | -3.615473 | 0.041690  |
| H | -1.664424 | 3.382429  | -2.341408 |
| H | -1.643160 | 4.326795  | 1.819458  |
| H | -5.182321 | -4.036743 | -1.195677 |
| H | -6.859790 | -0.111514 | -1.062462 |
| H | -1.064055 | 0.580182  | -2.678383 |
| H | -2.591580 | -0.089253 | -2.074152 |
| H | -2.588021 | 1.385343  | -3.020505 |
| H | -2.851476 | 1.335198  | 3.091098  |
| H | -1.100931 | 1.545560  | 3.255123  |
| H | -2.169760 | 2.930772  | 3.371129  |
| H | -0.252876 | 5.709792  | -0.594802 |
| H | -1.687813 | 5.746648  | -1.626464 |
| H | -1.814809 | 6.152592  | 0.096606  |
| H | -3.356180 | -4.176923 | 0.892232  |
| H | -2.800619 | -4.325925 | -0.777511 |
| H | -1.959194 | -3.258183 | 0.330953  |
| H | -8.056531 | -3.157894 | -1.201677 |
| H | -8.002758 | -1.825299 | -2.361891 |
| H | -7.186243 | -3.356592 | -2.723706 |
| H | -4.457478 | 1.861587  | -0.538385 |
| H | -6.006990 | 1.470301  | 0.209574  |
| H | -4.512728 | 1.336517  | 1.136457  |
| C | 0.835083  | -0.725168 | 1.872651  |
| C | -2.484279 | -1.166144 | 2.368995  |
| H | -0.011802 | -0.059840 | 2.040588  |
| H | 1.571002  | -0.385967 | 2.624474  |
| C | -0.400874 | -2.329693 | 3.443077  |
| H | -0.079230 | -2.617251 | 1.330558  |



|   |           |           |          |
|---|-----------|-----------|----------|
| H | 1.366833  | -2.789850 | 2.283599 |
| H | -0.828898 | -3.341338 | 3.468715 |
| H | 0.232145  | -2.243233 | 4.336916 |
| H | -2.152504 | -1.564575 | 4.423599 |
| H | -1.095622 | -0.319152 | 3.826592 |
| H | -3.358045 | -0.572523 | 2.651961 |
| H | -2.877058 | -2.165488 | 2.159006 |

## H<sub>6</sub>

E= -2571.2254381 au

|   |           |           |           |
|---|-----------|-----------|-----------|
| C | -2.023701 | 3.078924  | 0.663534  |
| C | -2.097059 | 1.909596  | -0.136424 |
| C | -1.863628 | 2.009552  | -1.538779 |
| C | -1.435719 | 3.230294  | -2.063839 |
| C | -1.233944 | 4.360819  | -1.271971 |
| C | -1.580680 | 4.268846  | 0.075147  |
| P | -2.295392 | 0.198661  | 0.541810  |
| C | -0.680755 | -0.677822 | -0.140090 |
| O | -0.658262 | -1.327025 | -1.156628 |
| C | -2.063914 | 0.891122  | -2.542335 |
| C | -0.660479 | 5.625235  | -1.858978 |
| C | -2.443023 | 3.189178  | 2.114916  |
| C | -1.010402 | 0.550040  | 3.221307  |
| C | 0.683513  | -1.469179 | 3.293594  |
| B | 1.763297  | -0.606250 | 0.925073  |
| O | 0.208784  | -0.336598 | 0.716382  |
| C | 2.466672  | 0.792339  | 0.393301  |
| C | 3.560104  | 1.386353  | 1.033143  |
| C | 4.110256  | 2.611353  | 0.660812  |
| C | 3.573454  | 3.305929  | -0.418309 |
| C | 2.511175  | 2.744316  | -1.114217 |
| C | 2.005305  | 1.509439  | -0.712654 |
| F | 4.163949  | 0.771238  | 2.070589  |
| F | 1.004529  | 1.018196  | -1.482730 |
| F | 1.980601  | 3.395539  | -2.169263 |
| F | 4.076284  | 4.493678  | -0.784198 |
| F | 5.151792  | 3.127292  | 1.332096  |
| C | 2.259144  | -1.946561 | 0.106783  |
| C | 1.536290  | -3.142964 | 0.080623  |
| C | 1.953291  | -4.305127 | -0.560653 |
| C | 3.182070  | -4.320937 | -1.210638 |
| C | 3.959033  | -3.169631 | -1.200730 |
| C | 3.492810  | -2.026256 | -0.550758 |

|   |           |           |           |
|---|-----------|-----------|-----------|
| F | 0.333247  | -3.237653 | 0.704424  |
| F | 1.185793  | -5.407697 | -0.549498 |
| F | 3.610937  | -5.429018 | -1.829469 |
| F | 5.153302  | -3.166272 | -1.812673 |
| F | 4.333152  | -0.970232 | -0.586564 |
| C | -3.882596 | -0.626853 | 0.060323  |
| C | -5.063872 | 0.130920  | -0.180224 |
| C | -6.234342 | -0.542851 | -0.540265 |
| C | -6.296638 | -1.931536 | -0.664088 |
| C | -5.141913 | -2.656325 | -0.376741 |
| C | -3.934625 | -2.047412 | -0.013619 |
| C | -5.171157 | 1.637284  | -0.052543 |
| C | -7.568508 | -2.620365 | -1.093514 |
| C | -2.775835 | -2.981481 | 0.263133  |
| H | -1.239059 | 3.287296  | -3.131903 |
| H | -1.512760 | 5.156277  | 0.700751  |
| H | -5.171308 | -3.741878 | -0.430856 |
| H | -7.132090 | 0.043918  | -0.720025 |
| H | -1.105827 | 0.456341  | -2.838921 |
| H | -2.689003 | 0.074018  | -2.180972 |
| H | -2.540745 | 1.300394  | -3.439615 |
| H | -3.133013 | 2.406585  | 2.431699  |
| H | -1.581541 | 3.171239  | 2.789097  |
| H | -2.951255 | 4.146516  | 2.269871  |
| H | 0.413263  | 5.492362  | -2.039905 |
| H | -1.124831 | 5.869803  | -2.820938 |
| H | -0.788370 | 6.479595  | -1.187304 |
| H | -2.159463 | -2.685337 | 1.115096  |
| H | -3.155956 | -3.983690 | 0.479489  |
| H | -2.104244 | -3.048537 | -0.595797 |
| H | -8.455020 | -2.073066 | -0.756363 |
| H | -7.623998 | -2.687779 | -2.188067 |
| H | -7.624616 | -3.640699 | -0.701103 |
| H | -4.646268 | 2.162909  | -0.855555 |
| H | -6.223224 | 1.933226  | -0.094156 |
| H | -4.768159 | 2.010258  | 0.893367  |
| C | 1.867343  | -0.778160 | 2.559167  |
| C | -2.194279 | -0.026801 | 2.395400  |
| H | 2.014403  | 0.206025  | 3.024830  |
| H | 2.791244  | -1.323860 | 2.786788  |
| C | -0.249112 | -0.503745 | 4.050579  |
| H | 0.098483  | -2.088934 | 2.608186  |
| H | 1.075500  | -2.165962 | 4.047013  |

|   |           |           |          |
|---|-----------|-----------|----------|
| H | -0.979604 | -1.084154 | 4.635138 |
| H | 0.353407  | 0.046724  | 4.786597 |
| H | -1.426616 | 1.284145  | 3.918277 |
| H | -0.305830 | 1.084974  | 2.582315 |
| H | -3.162044 | 0.291415  | 2.796363 |
| H | -2.199194 | -1.120645 | 2.469277 |

**I<sub>s</sub>**

**E= -2610.5495016au**

|   |           |           |           |
|---|-----------|-----------|-----------|
| C | 3.722451  | 3.022674  | 0.427551  |
| C | 4.393710  | 1.803672  | 0.709475  |
| C | 5.657075  | 1.874186  | 1.360634  |
| C | 6.256711  | 3.119489  | 1.586030  |
| C | 5.643388  | 4.319697  | 1.232986  |
| C | 4.366676  | 4.240411  | 0.675838  |
| P | 3.645733  | 0.090696  | 0.571738  |
| C | 0.845316  | -0.457649 | 2.757970  |
| O | 1.038036  | -1.602585 | 2.892752  |
| C | 6.401172  | 0.654725  | 1.866141  |
| C | 6.301398  | 5.653251  | 1.498829  |
| C | 2.297811  | 3.106123  | -0.079429 |
| C | 2.388162  | 0.137115  | -2.178425 |
| C | -1.088819 | -0.133249 | -1.811769 |
| B | -3.549733 | 0.143445  | -0.783266 |
| O | 0.638184  | 0.687842  | 2.635601  |
| C | -4.834847 | 1.003500  | -0.498409 |
| C | -5.203357 | 2.108156  | -1.290991 |
| C | -6.339438 | 2.875668  | -1.057632 |
| C | -7.163418 | 2.563996  | 0.021068  |
| C | -6.844624 | 1.488072  | 0.845753  |
| C | -5.708322 | 0.732517  | 0.574429  |
| F | -4.463194 | 2.468904  | -2.350087 |
| F | -5.465769 | -0.277519 | 1.421828  |
| F | -7.630069 | 1.192237  | 1.885613  |
| F | -8.249860 | 3.293018  | 0.263691  |
| F | -6.644647 | 3.905494  | -1.853103 |
| C | -3.433256 | -1.296083 | -0.128820 |
| C | -2.532374 | -1.578458 | 0.893402  |
| C | -2.406712 | -2.839751 | 1.466611  |
| C | -3.207855 | -3.878214 | 0.993690  |
| C | -4.121304 | -3.640046 | -0.032112 |
| C | -4.222019 | -2.358072 | -0.564890 |
| F | -1.755752 | -0.580823 | 1.377427  |

|   |           |           |           |
|---|-----------|-----------|-----------|
| F | -1.537224 | -3.061472 | 2.457553  |
| F | -3.100861 | -5.099344 | 1.523130  |
| F | -4.888536 | -4.636359 | -0.488111 |
| F | -5.117211 | -2.148140 | -1.552487 |
| C | 4.882512  | -0.990645 | -0.339910 |
| C | 5.745879  | -0.576753 | -1.388928 |
| C | 6.592619  | -1.517093 | -1.989741 |
| C | 6.622825  | -2.857842 | -1.600906 |
| C | 5.768534  | -3.250424 | -0.571298 |
| C | 4.906389  | -2.350007 | 0.067096  |
| C | 5.839842  | 0.847489  | -1.897102 |
| C | 7.542887  | -3.844050 | -2.281767 |
| C | 4.033482  | -2.892556 | 1.183145  |
| H | 7.232594  | 3.143854  | 2.067772  |
| H | 3.839442  | 5.161399  | 0.433169  |
| H | 5.771701  | -4.289228 | -0.247394 |
| H | 7.248119  | -1.185058 | -2.793314 |
| H | 7.182357  | 0.958711  | 2.570094  |
| H | 5.732017  | -0.038748 | 2.390087  |
| H | 6.879317  | 0.085795  | 1.062165  |
| H | 2.166798  | 2.648119  | -1.063303 |
| H | 1.598402  | 2.620153  | 0.611107  |
| H | 1.991342  | 4.153083  | -0.165783 |
| H | 5.915213  | 6.114415  | 2.417965  |
| H | 7.385008  | 5.548149  | 1.617080  |
| H | 6.117547  | 6.361070  | 0.682386  |
| H | 4.256295  | -3.950361 | 1.356790  |
| H | 4.186516  | -2.352833 | 2.123569  |
| H | 2.963285  | -2.816995 | 0.958666  |
| H | 7.274719  | -3.976754 | -3.337857 |
| H | 8.585201  | -3.503112 | -2.256881 |
| H | 7.500160  | -4.827243 | -1.802410 |
| H | 6.464985  | 1.467933  | -1.244566 |
| H | 6.289273  | 0.860725  | -2.895654 |
| H | 4.868460  | 1.340658  | -1.955159 |
| C | -2.411988 | 0.648332  | -1.748354 |
| C | 2.201690  | -0.028487 | -0.663375 |
| C | -0.130825 | 0.418235  | -2.880308 |
| C | 1.200991  | -0.349431 | -3.036194 |
| H | -2.877103 | 0.648096  | -2.751903 |
| H | -2.214122 | 1.715594  | -1.570193 |
| H | -0.608849 | -0.120198 | -0.827696 |
| H | -1.294360 | -1.189217 | -2.035197 |

|   |           |           |           |
|---|-----------|-----------|-----------|
| H | -0.661287 | 0.402222  | -3.843046 |
| H | 0.077350  | 1.479491  | -2.676461 |
| H | 1.030085  | -1.419352 | -2.845373 |
| H | 1.519283  | -0.282903 | -4.085122 |
| H | 3.274421  | -0.427554 | -2.487357 |
| H | 2.591779  | 1.186857  | -2.426325 |
| H | 1.870850  | -1.060279 | -0.473212 |
| H | 1.400034  | 0.608834  | -0.284029 |

### TS156

E= -2610.4860317au

|   |           |           |           |
|---|-----------|-----------|-----------|
| C | -2.126757 | 1.675298  | 1.796263  |
| C | -2.210671 | 1.026566  | 0.535201  |
| C | -2.555056 | 1.816470  | -0.604187 |
| C | -2.733237 | 3.197694  | -0.459976 |
| C | -2.593769 | 3.852877  | 0.760852  |
| C | -2.312821 | 3.061529  | 1.872066  |
| P | -1.880246 | -0.780860 | 0.078046  |
| C | -0.056500 | -1.109368 | -1.664105 |
| O | -0.421751 | -0.748976 | -2.725666 |
| C | -2.828467 | 1.263693  | -1.988827 |
| C | -2.705701 | 5.352738  | 0.872288  |
| C | -1.899217 | 0.987568  | 3.120907  |
| C | -1.611019 | -2.357399 | 2.780255  |
| C | 1.601022  | -2.315463 | 2.356910  |
| B | 1.692563  | -0.388246 | 0.466583  |
| O | 0.751621  | -1.604733 | -0.920639 |
| C | 1.357899  | 1.084171  | -0.082486 |
| C | 1.011480  | 2.146479  | 0.761176  |
| C | 0.888122  | 3.463756  | 0.329103  |
| C | 1.104687  | 3.771093  | -1.008680 |
| C | 1.479413  | 2.759651  | -1.887972 |
| C | 1.622373  | 1.461670  | -1.407835 |
| F | 0.830651  | 1.947314  | 2.081593  |
| F | 2.050747  | 0.543840  | -2.295553 |
| F | 1.719547  | 3.045694  | -3.173093 |
| F | 0.965354  | 5.026936  | -1.441846 |
| F | 0.563238  | 4.438402  | 1.191542  |
| C | 3.198604  | -0.870387 | 0.062618  |
| C | 3.599298  | -2.148961 | -0.347153 |
| C | 4.923656  | -2.489435 | -0.621385 |
| C | 5.930079  | -1.543857 | -0.462288 |
| C | 5.592562  | -0.269138 | -0.022615 |

|   |           |           |           |
|---|-----------|-----------|-----------|
| C | 4.256849  | 0.033816  | 0.229099  |
| F | 2.712807  | -3.152496 | -0.496289 |
| F | 5.233166  | -3.729450 | -1.024807 |
| F | 7.204678  | -1.860406 | -0.712082 |
| F | 6.547663  | 0.652130  | 0.161985  |
| F | 4.019351  | 1.283002  | 0.688990  |
| C | -3.596710 | -1.431135 | -0.446758 |
| C | -4.821149 | -1.005532 | 0.140389  |
| C | -6.034106 | -1.500491 | -0.355089 |
| C | -6.104620 | -2.430765 | -1.391041 |
| C | -4.898291 | -2.893010 | -1.908924 |
| C | -3.655382 | -2.424344 | -1.462098 |
| C | -4.933354 | -0.070286 | 1.325708  |
| C | -7.431886 | -2.953474 | -1.886591 |
| C | -2.447755 | -3.055883 | -2.128243 |
| H | -2.991011 | 3.775990  | -1.344396 |
| H | -2.228989 | 3.536465  | 2.846525  |
| H | -4.913501 | -3.648612 | -2.691750 |
| H | -6.957138 | -1.153648 | 0.105573  |
| H | -2.879578 | 2.084468  | -2.710498 |
| H | -2.068953 | 0.567086  | -2.342297 |
| H | -3.789831 | 0.738408  | -2.018858 |
| H | -2.643577 | 0.209264  | 3.309096  |
| H | -0.907177 | 0.539028  | 3.195285  |
| H | -1.979584 | 1.713305  | 3.935070  |
| H | -1.709639 | 5.810026  | 0.816838  |
| H | -3.310947 | 5.774133  | 0.063085  |
| H | -3.150366 | 5.654303  | 1.826959  |
| H | -2.723607 | -4.029941 | -2.543726 |
| H | -2.075455 | -2.442499 | -2.953704 |
| H | -1.613248 | -3.230390 | -1.443546 |
| H | -7.854535 | -3.689783 | -1.190112 |
| H | -8.166724 | -2.146670 | -1.986798 |
| H | -7.330706 | -3.443029 | -2.860466 |
| H | -4.784567 | 0.979082  | 1.055585  |
| H | -5.929190 | -0.159761 | 1.770921  |
| H | -4.206414 | -0.313026 | 2.104107  |
| C | 1.252505  | -0.872644 | 1.910783  |
| C | -1.429198 | -2.208334 | 1.257697  |
| C | 0.826877  | -2.817894 | 3.595805  |
| C | -0.597457 | -3.367379 | 3.359915  |
| H | 1.813960  | -0.179159 | 2.559394  |
| H | 0.213840  | -0.632286 | 2.127414  |

|   |           |           |          |
|---|-----------|-----------|----------|
| H | 1.467127  | -3.030115 | 1.537655 |
| H | 2.673342  | -2.346418 | 2.586251 |
| H | 1.408740  | -3.625088 | 4.060718 |
| H | 0.781102  | -2.012816 | 4.344546 |
| H | -0.544230 | -4.251451 | 2.707755 |
| H | -0.980680 | -3.726663 | 4.324361 |
| H | -2.636463 | -2.686927 | 2.988685 |
| H | -1.479628 | -1.417013 | 3.308571 |
| H | -2.005336 | -3.005814 | 0.777421 |
| H | -0.393776 | -2.400694 | 0.992510 |

## I<sub>6</sub>

E= -2610.5432795au

|   |           |           |           |
|---|-----------|-----------|-----------|
| C | -2.752074 | 2.069011  | 1.179387  |
| C | -2.613388 | 1.075097  | 0.174144  |
| C | -2.696079 | 1.448912  | -1.200656 |
| C | -2.810052 | 2.805515  | -1.517678 |
| C | -2.853920 | 3.807123  | -0.547520 |
| C | -2.868141 | 3.406750  | 0.787733  |
| P | -2.131707 | -0.682385 | 0.520181  |
| C | -0.290243 | -0.644797 | -0.158928 |
| O | -0.043486 | -0.686004 | -1.341796 |
| C | -2.731293 | 0.476933  | -2.364295 |
| C | -2.841914 | 5.266031  | -0.926365 |
| C | -2.806939 | 1.805474  | 2.668282  |
| C | -0.960813 | -0.919044 | 3.259677  |
| C | 2.559408  | -1.109312 | 3.253776  |
| B | 1.940555  | 0.126858  | 0.876235  |
| O | 0.449959  | -0.448129 | 0.867666  |
| C | 1.727936  | 1.613910  | 0.177596  |
| C | 0.963335  | 2.594411  | 0.823301  |
| C | 0.688847  | 3.851932  | 0.294180  |
| C | 1.158844  | 4.177669  | -0.971033 |
| C | 1.904527  | 3.239553  | -1.672773 |
| C | 2.159562  | 1.991630  | -1.100098 |
| F | 0.395825  | 2.354464  | 2.034682  |
| F | 2.846481  | 1.142181  | -1.884456 |
| F | 2.349462  | 3.529355  | -2.904745 |
| F | 0.868016  | 5.372747  | -1.510998 |
| F | -0.061359 | 4.740230  | 0.974177  |
| C | 2.968230  | -0.891505 | 0.103144  |
| C | 2.728770  | -2.231454 | -0.196004 |
| C | 3.676010  | -3.088893 | -0.755732 |

|   |           |           |           |
|---|-----------|-----------|-----------|
| C | 4.954739  | -2.616013 | -1.019259 |
| C | 5.261476  | -1.293585 | -0.709926 |
| C | 4.279867  | -0.479413 | -0.155024 |
| F | 1.525028  | -2.806311 | 0.072985  |
| F | 3.364487  | -4.368180 | -1.024954 |
| F | 5.882656  | -3.422752 | -1.552869 |
| F | 6.496341  | -0.823153 | -0.943554 |
| F | 4.650611  | 0.786587  | 0.140374  |
| C | -3.294979 | -1.875414 | -0.280996 |
| C | -4.693074 | -1.615582 | -0.283127 |
| C | -5.545223 | -2.547336 | -0.881762 |
| C | -5.078289 | -3.729594 | -1.461859 |
| C | -3.709805 | -3.985296 | -1.398585 |
| C | -2.802237 | -3.095287 | -0.811318 |
| C | -5.344735 | -0.395094 | 0.337316  |
| C | -6.033610 | -4.714053 | -2.091468 |
| C | -1.349454 | -3.512149 | -0.772939 |
| H | -2.849623 | 3.084648  | -2.567637 |
| H | -2.946205 | 4.162796  | 1.564015  |
| H | -3.324176 | -4.913686 | -1.812699 |
| H | -6.613546 | -2.342432 | -0.885021 |
| H | -2.612576 | 1.026760  | -3.302026 |
| H | -1.936979 | -0.268835 | -2.324797 |
| H | -3.692585 | -0.048307 | -2.410327 |
| H | -3.547139 | 1.044209  | 2.934442  |
| H | -1.838845 | 1.498228  | 3.066898  |
| H | -3.091251 | 2.722201  | 3.191325  |
| H | -1.806314 | 5.625079  | -0.982507 |
| H | -3.305785 | 5.434937  | -1.903528 |
| H | -3.361692 | 5.880541  | -0.184160 |
| H | -1.261734 | -4.579626 | -0.992744 |
| H | -0.745020 | -2.967830 | -1.503018 |
| H | -0.886202 | -3.349728 | 0.205130  |
| H | -6.598576 | -5.259871 | -1.324650 |
| H | -6.764892 | -4.206682 | -2.730568 |
| H | -5.503704 | -5.452529 | -2.700399 |
| H | -5.225497 | 0.500324  | -0.281224 |
| H | -6.416963 | -0.573891 | 0.458927  |
| H | -4.943462 | -0.155063 | 1.326772  |
| C | 2.400643  | 0.207481  | 2.444979  |
| C | -2.115157 | -1.287327 | 2.292789  |
| C | 1.374828  | -1.573830 | 4.130406  |
| C | 0.096511  | -2.029977 | 3.391044  |

|   |           |           |          |
|---|-----------|-----------|----------|
| H | 3.388521  | 0.689641  | 2.411477 |
| H | 1.775109  | 0.898850  | 3.019931 |
| H | 2.835859  | -1.937503 | 2.586969 |
| H | 3.411330  | -0.995867 | 3.938969 |
| H | 1.735977  | -2.413400 | 4.739359 |
| H | 1.117724  | -0.779389 | 4.847595 |
| H | 0.373804  | -2.404369 | 2.400261 |
| H | -0.361077 | -2.874215 | 3.926699 |
| H | -1.402931 | -0.733045 | 4.247105 |
| H | -0.471758 | 0.004008  | 2.954998 |
| H | -3.097395 | -1.028358 | 2.699078 |
| H | -2.141980 | -2.374425 | 2.146297 |

**J<sub>5</sub>**

**E= -2491.3971203au**

|   |           |           |           |
|---|-----------|-----------|-----------|
| C | -2.784658 | -2.272601 | 0.110108  |
| C | -4.196762 | -2.185027 | 0.237703  |
| C | -4.952543 | -3.364839 | 0.284100  |
| H | -6.033476 | -3.278374 | 0.376014  |
| C | -4.382428 | -4.635824 | 0.223480  |
| C | -2.992714 | -4.707716 | 0.149263  |
| H | -2.509831 | -5.683165 | 0.138700  |
| C | -2.186635 | -3.564970 | 0.105420  |
| C | -4.980173 | -0.892553 | 0.353566  |
| H | -4.923776 | -0.283009 | -0.551963 |
| H | -4.632276 | -0.263544 | 1.177617  |
| H | -6.035995 | -1.117582 | 0.534050  |
| C | -5.236005 | -5.881707 | 0.236792  |
| H | -6.168904 | -5.723471 | 0.788613  |
| H | -4.708171 | -6.724425 | 0.696493  |
| H | -5.509527 | -6.187574 | -0.782281 |
| C | -0.688524 | -3.783967 | 0.070968  |
| H | -0.155991 | -3.131691 | 0.771868  |
| H | -0.259461 | -3.587500 | -0.916661 |
| H | -0.453299 | -4.820549 | 0.332390  |
| C | -2.449257 | 0.792955  | -0.030477 |
| C | -2.947552 | 1.374410  | -1.222276 |
| C | -3.413046 | 2.695435  | -1.198420 |
| H | -3.782581 | 3.133501  | -2.123620 |
| C | -3.421491 | 3.465167  | -0.034071 |
| C | -2.988472 | 2.857465  | 1.146730  |
| H | -3.019556 | 3.422060  | 2.076511  |
| C | -2.499979 | 1.546279  | 1.172437  |

|   |           |           |           |
|---|-----------|-----------|-----------|
| C | -3.036138 | 0.634122  | -2.538961 |
| H | -3.772020 | 1.113566  | -3.192958 |
| H | -3.336002 | -0.409626 | -2.403848 |
| H | -2.075331 | 0.636430  | -3.063752 |
| C | -3.842171 | 4.914722  | -0.056346 |
| H | -4.320375 | 5.212364  | 0.883096  |
| H | -4.538026 | 5.120946  | -0.876363 |
| H | -2.966030 | 5.561280  | -0.197868 |
| C | -2.065466 | 0.980700  | 2.510239  |
| H | -2.245697 | 1.708569  | 3.307693  |
| H | -1.002720 | 0.719071  | 2.526431  |
| H | -2.612695 | 0.066282  | 2.768716  |
| C | 2.900105  | -0.519377 | -0.721060 |
| C | 3.155920  | -1.901255 | -0.677890 |
| F | 2.172826  | -2.783477 | -0.906568 |
| C | 4.405950  | -2.439581 | -0.389844 |
| F | 4.588611  | -3.763222 | -0.347925 |
| C | 5.477198  | -1.583810 | -0.148443 |
| F | 6.683133  | -2.081417 | 0.120258  |
| C | 5.284911  | -0.204630 | -0.194672 |
| F | 6.316191  | 0.618854  | 0.022529  |
| C | 4.017842  | 0.297476  | -0.469128 |
| C | 1.066924  | 1.483498  | -0.486887 |
| C | 0.390953  | 2.399517  | -1.303610 |
| F | 0.128286  | 2.091748  | -2.586889 |
| C | -0.003473 | 3.658361  | -0.863656 |
| F | -0.649566 | 4.502621  | -1.676229 |
| C | 0.255634  | 4.029361  | 0.451775  |
| F | -0.151544 | 5.218674  | 0.899403  |
| C | 0.927487  | 3.154326  | 1.304161  |
| F | 1.165417  | 3.509214  | 2.571724  |
| C | 1.325812  | 1.915188  | 0.820234  |
| F | 1.960288  | 1.096918  | 1.684769  |
| F | 3.911926  | 1.635156  | -0.515831 |
| B | 1.467066  | 0.059151  | -1.021696 |
| P | -1.551294 | -0.848672 | 0.099710  |
| C | 0.464800  | -0.729815 | -1.938994 |
| C | -0.781859 | -1.100365 | -1.574349 |
| H | -1.360968 | -1.699898 | -2.279105 |
| O | 1.872387  | -2.022428 | 2.345028  |
| C | 1.321297  | -1.369842 | 3.145049  |
| O | 0.778211  | -0.731181 | 3.959171  |
| C | 0.971537  | -1.091648 | -3.327402 |

|   |          |           |           |
|---|----------|-----------|-----------|
| H | 1.215071 | -0.190245 | -3.905028 |
| H | 1.884490 | -1.696760 | -3.275080 |
| H | 0.220218 | -1.655787 | -3.890833 |

**TS<sub>J56</sub>**

**E= -2491.3792704au**

|   |           |           |           |
|---|-----------|-----------|-----------|
| C | -3.478479 | -1.565016 | 0.149743  |
| C | -4.780105 | -1.015265 | 0.298546  |
| C | -5.892150 | -1.853865 | 0.147029  |
| H | -6.882777 | -1.417314 | 0.255176  |
| C | -5.781301 | -3.216802 | -0.123307 |
| C | -4.495976 | -3.753927 | -0.185970 |
| H | -4.375821 | -4.824630 | -0.336740 |
| C | -3.345767 | -2.972354 | -0.034870 |
| C | -5.080693 | 0.427771  | 0.654162  |
| H | -4.875561 | 1.120795  | -0.166838 |
| H | -4.502615 | 0.774599  | 1.514662  |
| H | -6.140082 | 0.526099  | 0.909766  |
| C | -7.003518 | -4.078926 | -0.328121 |
| H | -7.869622 | -3.682309 | 0.212152  |
| H | -6.831318 | -5.106102 | 0.010784  |
| H | -7.277548 | -4.129207 | -1.390627 |
| C | -2.020544 | -3.709394 | -0.008463 |
| H | -1.493814 | -3.538840 | 0.936139  |
| H | -1.338532 | -3.420171 | -0.812082 |
| H | -2.194421 | -4.785991 | -0.095134 |
| C | -2.156412 | 1.243451  | 0.193669  |
| C | -2.481772 | 1.903529  | -1.018974 |
| C | -2.496843 | 3.302184  | -1.048856 |
| H | -2.736594 | 3.799081  | -1.986438 |
| C | -2.210989 | 4.077447  | 0.077175  |
| C | -1.961725 | 3.409418  | 1.277072  |
| H | -1.780878 | 3.990012  | 2.179386  |
| C | -1.928460 | 2.012776  | 1.362570  |
| C | -2.838634 | 1.180083  | -2.299610 |
| H | -3.451698 | 1.825738  | -2.936764 |
| H | -3.400498 | 0.259369  | -2.117006 |
| H | -1.939041 | 0.916598  | -2.864514 |
| C | -2.138163 | 5.582589  | -0.006432 |
| H | -2.446366 | 6.055026  | 0.932278  |
| H | -2.768427 | 5.973320  | -0.811983 |
| H | -1.107891 | 5.900538  | -0.212792 |
| C | -1.646767 | 1.409893  | 2.724141  |

|   |           |           |           |
|---|-----------|-----------|-----------|
| H | -1.864141 | 2.140242  | 3.509694  |
| H | -0.591521 | 1.130593  | 2.824748  |
| H | -2.241497 | 0.515317  | 2.929609  |
| C | 2.752860  | -1.282760 | -0.368567 |
| C | 2.604424  | -2.649690 | -0.093765 |
| F | 1.375815  | -3.190095 | 0.002695  |
| C | 3.677811  | -3.512665 | 0.099717  |
| F | 3.477776  | -4.807981 | 0.370372  |
| C | 4.975807  | -3.016498 | 0.001380  |
| F | 6.018836  | -3.830426 | 0.174498  |
| C | 5.177857  | -1.669776 | -0.285186 |
| F | 6.422678  | -1.190081 | -0.393399 |
| C | 4.076892  | -0.834727 | -0.459855 |
| C | 1.603290  | 1.217741  | -0.340636 |
| C | 1.049264  | 2.153301  | -1.223408 |
| F | 0.468297  | 1.755653  | -2.371891 |
| C | 1.081966  | 3.526271  | -0.998685 |
| F | 0.518040  | 4.378617  | -1.866271 |
| C | 1.684594  | 4.014278  | 0.154213  |
| F | 1.688863  | 5.328317  | 0.399071  |
| C | 2.277122  | 3.128455  | 1.051264  |
| F | 2.872803  | 3.596808  | 2.154834  |
| C | 2.240359  | 1.763622  | 0.784592  |
| F | 2.842657  | 0.962606  | 1.674652  |
| F | 4.348104  | 0.449216  | -0.753329 |
| B | 1.489082  | -0.344645 | -0.582532 |
| P | -1.886526 | -0.600697 | 0.289271  |
| C | 0.325304  | -0.905239 | -1.504540 |
| C | -0.996561 | -1.012565 | -1.263578 |
| H | -1.628962 | -1.437732 | -2.043179 |
| O | 0.739142  | -0.824329 | 1.526073  |
| C | -0.269644 | -1.322423 | 1.961558  |
| O | -0.834792 | -1.968717 | 2.781433  |
| C | 0.833151  | -1.347666 | -2.871931 |
| H | 1.379205  | -0.538502 | -3.373376 |
| H | 1.527240  | -2.191874 | -2.779932 |
| H | 0.008823  | -1.649822 | -3.526983 |

**J<sub>6</sub>**

**E= -2491.4063814au**

|   |           |           |           |
|---|-----------|-----------|-----------|
| C | 0.733574  | -1.078380 | -1.340408 |
| O | 1.206227  | -1.606304 | -2.323735 |
| O | -0.515297 | -0.869903 | -1.092167 |

|   |           |           |           |
|---|-----------|-----------|-----------|
| C | 3.494412  | -1.451030 | -0.069593 |
| C | 4.776645  | -0.850011 | -0.204783 |
| C | 5.904507  | -1.678416 | -0.225580 |
| H | 6.881466  | -1.212979 | -0.330258 |
| C | 5.825914  | -3.066603 | -0.123645 |
| C | 4.557056  | -3.635818 | -0.022826 |
| H | 4.464442  | -4.718019 | 0.029425  |
| C | 3.385951  | -2.872680 | -0.003880 |
| C | 5.044548  | 0.634844  | -0.351852 |
| H | 4.764260  | 1.207737  | 0.536235  |
| H | 4.510751  | 1.074210  | -1.198148 |
| H | 6.113238  | 0.794402  | -0.519768 |
| C | 7.067916  | -3.923465 | -0.113765 |
| H | 7.916030  | -3.406185 | -0.573242 |
| H | 6.908391  | -4.864366 | -0.650989 |
| H | 7.357131  | -4.181600 | 0.913622  |
| C | 2.082304  | -3.643599 | 0.018755  |
| H | 1.627690  | -3.652440 | -0.977455 |
| H | 1.338180  | -3.236550 | 0.705740  |
| H | 2.270194  | -4.681023 | 0.309033  |
| C | 2.080941  | 1.353700  | -0.012208 |
| C | 2.269690  | 2.064614  | 1.202421  |
| C | 2.170076  | 3.457755  | 1.188199  |
| H | 2.302153  | 3.995787  | 2.123900  |
| C | 1.896093  | 4.175877  | 0.022227  |
| C | 1.805252  | 3.460576  | -1.172669 |
| H | 1.649803  | 4.001864  | -2.103060 |
| C | 1.896303  | 2.065533  | -1.225971 |
| C | 2.598894  | 1.413465  | 2.529303  |
| H | 3.143959  | 2.120995  | 3.161917  |
| H | 3.224807  | 0.521139  | 2.424347  |
| H | 1.686466  | 1.126707  | 3.060654  |
| C | 1.675618  | 5.667261  | 0.057941  |
| H | 1.964651  | 6.141957  | -0.885274 |
| H | 2.237286  | 6.139479  | 0.870480  |
| H | 0.612406  | 5.882820  | 0.225136  |
| C | 1.802551  | 1.423915  | -2.594252 |
| H | 2.088830  | 2.152252  | -3.358757 |
| H | 0.779777  | 1.102742  | -2.823661 |
| H | 2.446342  | 0.548535  | -2.708305 |
| C | -2.592487 | -1.436601 | 0.174196  |
| C | -2.451368 | -2.813122 | -0.028260 |
| F | -1.214597 | -3.357379 | -0.118261 |

|   |           |           |           |
|---|-----------|-----------|-----------|
| C | -3.520493 | -3.698431 | -0.122763 |
| F | -3.315743 | -5.009612 | -0.317652 |
| C | -4.818053 | -3.209099 | 0.001722  |
| F | -5.863633 | -4.040564 | -0.080644 |
| C | -5.013883 | -1.851110 | 0.224713  |
| F | -6.258316 | -1.370013 | 0.359866  |
| C | -3.911039 | -1.000091 | 0.310181  |
| C | -1.551131 | 1.119788  | 0.110193  |
| C | -1.248576 | 2.075124  | 1.078837  |
| F | -0.740836 | 1.713574  | 2.282360  |
| C | -1.415856 | 3.446097  | 0.890685  |
| F | -1.043973 | 4.320352  | 1.842146  |
| C | -1.928226 | 3.914437  | -0.310733 |
| F | -2.055642 | 5.233415  | -0.518684 |
| C | -2.280974 | 3.002317  | -1.301361 |
| F | -2.786535 | 3.441557  | -2.463086 |
| C | -2.091795 | 1.642322  | -1.071618 |
| F | -2.459042 | 0.812402  | -2.065463 |
| F | -4.192771 | 0.297544  | 0.549533  |
| B | -1.249819 | -0.492215 | 0.226293  |
| P | 1.929117  | -0.488146 | 0.048541  |
| C | -0.342925 | -0.889839 | 1.526540  |
| C | 1.004926  | -0.956383 | 1.522334  |
| H | 1.582400  | -1.265587 | 2.391514  |
| C | -1.060046 | -1.251111 | 2.807246  |
| H | -1.614063 | -2.188526 | 2.679242  |
| H | -0.372773 | -1.369995 | 3.652439  |
| H | -1.797030 | -0.482922 | 3.065872  |

## J7

E= -2492.583573au

|   |             |             |             |
|---|-------------|-------------|-------------|
| C | -0.73076900 | -1.07766300 | 1.30182300  |
| O | -1.20139200 | -1.61852500 | 2.28108800  |
| O | 0.51640100  | -0.86357200 | 1.05641900  |
| C | -3.49163900 | -1.45071500 | 0.03652500  |
| C | -4.77605600 | -0.85651200 | 0.18081000  |
| C | -5.90012300 | -1.69015700 | 0.19705600  |
| H | -6.87884300 | -1.23011400 | 0.30867500  |
| C | -5.81562700 | -3.07697500 | 0.08211800  |
| C | -4.54456800 | -3.63962200 | -0.02811400 |
| H | -4.44736100 | -4.72085100 | -0.09098200 |
| C | -3.37692400 | -2.87125100 | -0.04347500 |
| C | -5.05015300 | 0.62575100  | 0.34196100  |

|   |             |             |             |
|---|-------------|-------------|-------------|
| H | -4.77341600 | 1.20809400  | -0.54108800 |
| H | -4.51735800 | 1.05952500  | 1.19177800  |
| H | -6.11931600 | 0.77915800  | 0.51248600  |
| C | -7.05365400 | -3.93947300 | 0.06855100  |
| H | -7.90531300 | -3.42636500 | 0.52606100  |
| H | -6.89112100 | -4.87986600 | 0.60581300  |
| H | -7.33877500 | -4.19863700 | -0.95969900 |
| C | -2.07006200 | -3.63621300 | -0.07817600 |
| H | -1.61368000 | -3.65635600 | 0.91707800  |
| H | -1.32883300 | -3.21723600 | -0.76104500 |
| H | -2.25402700 | -4.67057000 | -0.38154000 |
| C | -2.08929500 | 1.36088400  | 0.00591500  |
| C | -2.28266600 | 2.08424000  | -1.20067900 |
| C | -2.18766500 | 3.47743600  | -1.17140600 |
| H | -2.32302100 | 4.02512900  | -2.10098800 |
| C | -1.91410500 | 4.18371100  | 0.00189100  |
| C | -1.81924500 | 3.45578500  | 1.18883000  |
| H | -1.66431000 | 3.98746500  | 2.12481400  |
| C | -1.90548600 | 2.05992600  | 1.22721900  |
| C | -2.61265100 | 1.44649200  | -2.53387200 |
| H | -3.16105000 | 2.15928400  | -3.15761100 |
| H | -3.23611300 | 0.55147300  | -2.43730600 |
| H | -1.70062300 | 1.16810700  | -3.07032300 |
| C | -1.69859700 | 5.67610100  | -0.01794500 |
| H | -1.98811800 | 6.13960000  | 0.93066400  |
| H | -2.26271400 | 6.15520700  | -0.82472300 |
| H | -0.63627200 | 5.89694000  | -0.18392600 |
| C | -1.80823200 | 1.40405800  | 2.58846100  |
| H | -2.09654000 | 2.12313100  | 3.36088500  |
| H | -0.78417900 | 1.08420600  | 2.81401600  |
| H | -2.44898700 | 0.52535500  | 2.69366800  |
| C | 2.59412600  | -1.40965400 | -0.21863700 |
| C | 2.45698500  | -2.78888900 | -0.03260100 |
| F | 1.22157700  | -3.33752500 | 0.05007500  |
| C | 3.52857400  | -3.67211500 | 0.05216400  |
| F | 3.32757600  | -4.98603000 | 0.23086900  |
| C | 4.82473700  | -3.17731900 | -0.06528800 |
| F | 5.87271000  | -4.00649000 | 0.00791300  |
| C | 5.01669900  | -1.81615500 | -0.27176700 |
| F | 6.25973200  | -1.32971200 | -0.39995200 |
| C | 3.91145100  | -0.96742400 | -0.34800500 |
| C | 1.54342400  | 1.14235000  | -0.12758100 |
| C | 1.23534100  | 2.10620300  | -1.08603400 |

|   |             |             |             |
|---|-------------|-------------|-------------|
| F | 0.72766500  | 1.75461800  | -2.29254800 |
| C | 1.39655300  | 3.47587900  | -0.88384500 |
| F | 1.01915000  | 4.35823900  | -1.82555500 |
| C | 1.90823600  | 3.93404000  | 0.32179900  |
| F | 2.02939000  | 5.25137900  | 0.54332600  |
| C | 2.26639000  | 3.01340100  | 1.30256300  |
| F | 2.77107200  | 3.44285900  | 2.46819200  |
| C | 2.08318100  | 1.65497500  | 1.05901900  |
| F | 2.45482800  | 0.81647700  | 2.04368100  |
| F | 4.18941500  | 0.33386900  | -0.57115700 |
| B | 1.24903400  | -0.46921000 | -0.26020000 |
| P | -1.93154700 | -0.47945800 | -0.07637900 |
| C | 0.34024800  | -0.85714500 | -1.56196100 |
| C | -1.00738700 | -0.92882500 | -1.55581200 |
| H | -1.58552300 | -1.23165400 | -2.42676000 |
| C | 1.05600300  | -1.20317500 | -2.84759500 |
| H | 1.61122700  | -2.14129100 | -2.73045000 |
| H | 0.36768700  | -1.31364900 | -3.69304900 |
| H | 1.79173300  | -0.43134900 | -3.09873600 |
| H | 0.89769200  | -2.77890200 | 4.58395500  |
| H | 0.47482300  | -2.50197200 | 4.03789300  |

**TSJ78**

**E= -2492.43955au**

|   |             |             |             |
|---|-------------|-------------|-------------|
| P | -1.98720100 | 0.07288100  | 0.03509700  |
| B | 1.42621300  | -0.00892400 | -0.08966000 |
| O | 0.61163000  | 0.17115300  | 1.23309800  |
| O | -0.94152500 | 0.02869800  | 2.88931200  |
| C | -0.90138800 | 0.04111000  | -1.41671400 |
| C | 0.45118500  | 0.05499500  | -1.38975600 |
| C | -0.46667200 | -0.22483200 | 1.80197700  |
| C | -3.14299300 | -1.40476900 | 0.13352600  |
| C | -3.04193500 | -2.57833500 | -0.66217000 |
| C | -3.92183300 | -3.63751900 | -0.41258600 |
| H | -3.84475900 | -4.52740600 | -1.03319500 |
| C | -4.88368800 | -3.59988400 | 0.59807800  |
| C | -4.94506000 | -2.45245600 | 1.38956300  |
| H | -5.67468100 | -2.40144400 | 2.19464300  |
| C | -4.08975900 | -1.36318000 | 1.19788900  |
| C | -2.03905000 | -2.77890800 | -1.77934600 |
| H | -1.00856300 | -2.67834500 | -1.42978900 |
| H | -2.17382700 | -2.06184400 | -2.59512800 |
| H | -2.15184500 | -3.78169100 | -2.20134500 |



|   |             |             |             |
|---|-------------|-------------|-------------|
| C | -5.79360400 | -4.77653900 | 0.85389600  |
| H | -5.32613500 | -5.49035000 | 1.54516500  |
| H | -6.01721000 | -5.31919800 | -0.07057700 |
| H | -6.74056900 | -4.46052600 | 1.30347400  |
| C | -4.24176700 | -0.18462300 | 2.13913000  |
| H | -4.70888800 | 0.67456400  | 1.64584100  |
| H | -3.28201300 | 0.14730600  | 2.54806000  |
| H | -4.87328200 | -0.46601700 | 2.98691700  |
| C | -3.03209200 | 1.59805700  | -0.23062200 |
| C | -2.66284000 | 2.78245400  | 0.44584900  |
| C | -3.41131600 | 3.94553400  | 0.23003700  |
| H | -3.12263300 | 4.85272000  | 0.75544100  |
| C | -4.50047900 | 3.97834600  | -0.63990700 |
| C | -4.82388600 | 2.80304800  | -1.32361300 |
| H | -5.65498600 | 2.81049700  | -2.02608600 |
| C | -4.11452500 | 1.61058000  | -1.14829500 |
| C | -1.45961400 | 2.86061500  | 1.35585900  |
| H | -1.40165400 | 3.84482500  | 1.82993600  |
| H | -0.53541400 | 2.72060400  | 0.78364100  |
| H | -1.47832600 | 2.11146000  | 2.15358700  |
| C | -5.29702900 | 5.24247700  | -0.85756100 |
| H | -4.91932400 | 6.06447700  | -0.24218300 |
| H | -6.35501700 | 5.09394500  | -0.60871600 |
| H | -5.25562600 | 5.56168400  | -1.90631600 |
| C | -4.55876400 | 0.41493400  | -1.96510300 |
| H | -5.21485100 | 0.74371700  | -2.77660400 |
| H | -5.11326400 | -0.31301700 | -1.36335500 |
| H | -3.71963900 | -0.12028100 | -2.41968400 |
| C | 2.41095300  | 1.30167700  | 0.07650300  |
| C | 3.51352000  | 1.28496100  | 0.93751100  |
| F | 3.85335100  | 0.15099200  | 1.58394800  |
| C | 4.31790300  | 2.39288100  | 1.18860700  |
| F | 5.36941300  | 2.30332300  | 2.01514700  |
| C | 4.01911300  | 3.60738300  | 0.57796400  |
| F | 4.77780400  | 4.68549100  | 0.80663300  |
| C | 2.91692800  | 3.68760000  | -0.26424500 |
| F | 2.59952700  | 4.85491200  | -0.84477100 |
| C | 2.14003900  | 2.55054500  | -0.48390900 |
| F | 1.05806200  | 2.72976700  | -1.27901300 |
| C | 2.26777400  | -1.43520600 | -0.16731700 |
| C | 3.51061900  | -1.51433400 | -0.81103600 |
| F | 4.06633500  | -0.41767200 | -1.36677500 |
| C | 4.24859500  | -2.68800800 | -0.94409900 |

|   |             |             |             |
|---|-------------|-------------|-------------|
| F | 5.43604900  | -2.67836900 | -1.56326600 |
| C | 3.74330000  | -3.88072000 | -0.43661300 |
| F | 4.43472400  | -5.01868100 | -0.55671800 |
| C | 2.49841600  | -3.87084700 | 0.17975100  |
| F | 1.96990700  | -5.00866100 | 0.65171100  |
| C | 1.80241600  | -2.66851900 | 0.28218500  |
| F | 0.56401700  | -2.77737600 | 0.84759400  |
| H | -0.68341500 | -1.42558200 | 1.50226700  |
| H | -1.22929500 | -1.00884000 | 1.00142500  |
| H | -1.41469300 | 0.12565600  | -2.37535200 |
| C | 1.15512900  | 0.07484000  | -2.73368800 |
| H | 0.46356400  | 0.27813500  | -3.55835600 |
| H | 1.95467400  | 0.82057500  | -2.75934700 |
| H | 1.62951700  | -0.89673500 | -2.92264600 |

## J8

E= -2492.612566au

|   |             |             |             |
|---|-------------|-------------|-------------|
| P | 2.16573300  | -0.13871700 | -0.08476400 |
| B | -1.31548500 | -0.22351100 | -0.17670100 |
| O | -0.38020800 | 0.08752300  | 0.96817700  |
| O | 0.08989400  | 0.44752100  | 3.11797500  |
| C | 1.02522100  | -0.35264900 | -1.46358200 |
| H | 1.58041600  | -0.50271800 | -2.39037700 |
| C | -0.32630900 | -0.44693000 | -1.46368700 |
| C | -0.72073100 | 0.37056200  | 2.21689200  |
| C | 2.53717200  | 1.55180500  | 0.52103000  |
| C | 2.25048100  | 2.72782000  | -0.21540400 |
| C | 2.58250500  | 3.96074100  | 0.35409400  |
| H | 2.36675300  | 4.86451100  | -0.21090000 |
| C | 3.17065000  | 4.07383700  | 1.61586000  |
| C | 3.43976900  | 2.89947000  | 2.31971300  |
| H | 3.89633200  | 2.96160800  | 3.30462900  |
| C | 3.13055900  | 1.63655700  | 1.80747800  |
| C | 1.59271900  | 2.75257800  | -1.57787700 |
| H | 0.53055700  | 2.50815900  | -1.50190700 |
| H | 2.03374300  | 2.04671600  | -2.28687300 |
| H | 1.67648300  | 3.75313000  | -2.01218400 |
| C | 3.47948700  | 5.42631000  | 2.21017000  |
| H | 2.60844000  | 5.82107200  | 2.74949300  |
| H | 3.74029600  | 6.15579100  | 1.43617500  |
| H | 4.30785300  | 5.37157800  | 2.92394700  |
| C | 3.40652800  | 0.42889100  | 2.67562300  |
| H | 3.94304500  | -0.36589900 | 2.14537100  |

|   |             |             |             |
|---|-------------|-------------|-------------|
| H | 2.45775700  | 0.02919400  | 3.05584500  |
| H | 4.01596800  | 0.71466100  | 3.53753300  |
| C | 3.68891400  | -1.07970500 | -0.53776400 |
| C | 4.79699000  | -0.50469000 | -1.20656200 |
| C | 5.89647400  | -1.31584000 | -1.50709800 |
| H | 6.74289000  | -0.86974400 | -2.02425200 |
| C | 5.94096500  | -2.67097200 | -1.17553200 |
| C | 4.82936100  | -3.22175100 | -0.53532800 |
| H | 4.83152300  | -4.28020300 | -0.28550700 |
| C | 3.70177000  | -2.46251400 | -0.20805700 |
| C | 4.86534000  | 0.94609200  | -1.62989400 |
| H | 5.74334300  | 1.11147000  | -2.26075600 |
| H | 4.93683300  | 1.62249900  | -0.77263000 |
| H | 3.98870700  | 1.25026900  | -2.21004000 |
| C | 7.15559300  | -3.51121700 | -1.48753900 |
| H | 7.70241000  | -3.12022200 | -2.35158800 |
| H | 6.88078500  | -4.55016000 | -1.69737300 |
| H | 7.85168300  | -3.52384500 | -0.63833400 |
| C | 2.55148200  | -3.17377800 | 0.47715000  |
| H | 2.73651800  | -4.25136400 | 0.49271600  |
| H | 1.59264400  | -3.01594700 | -0.02620700 |
| H | 2.43446500  | -2.85458300 | 1.52119200  |
| C | -2.15378200 | -1.59667800 | 0.23100600  |
| C | -3.29687200 | -1.56048200 | 1.03665300  |
| F | -3.79561900 | -0.37560700 | 1.46016200  |
| C | -3.98651300 | -2.69040300 | 1.46909400  |
| F | -5.07727900 | -2.57539800 | 2.23893500  |
| C | -3.53109200 | -3.95135600 | 1.09731200  |
| F | -4.17529000 | -5.05215700 | 1.50135800  |
| C | -2.39274100 | -4.05047500 | 0.30616100  |
| F | -1.93195000 | -5.25727800 | -0.05668300 |
| C | -1.73872700 | -2.88806300 | -0.09936800 |
| F | -0.63367700 | -3.08542900 | -0.86369500 |
| C | -2.31788000 | 1.04947000  | -0.53070600 |
| C | -3.49782100 | 0.88754300  | -1.26463200 |
| F | -3.86787600 | -0.34160200 | -1.69127200 |
| C | -4.35347100 | 1.93029500  | -1.60901400 |
| F | -5.46997100 | 1.69828200  | -2.31431500 |
| C | -4.03962700 | 3.22809300  | -1.21690000 |
| F | -4.84412600 | 4.24782000  | -1.53980900 |
| C | -2.87384300 | 3.45048000  | -0.49441100 |
| F | -2.54791400 | 4.69645200  | -0.11768100 |
| C | -2.04667300 | 2.37339600  | -0.17460100 |

|   |             |             |             |
|---|-------------|-------------|-------------|
| F | -0.92453400 | 2.69271800  | 0.51342800  |
| H | 1.71408300  | -0.82052600 | 1.04561000  |
| H | -1.79929800 | 0.52715100  | 2.37626100  |
| C | -0.96983300 | -0.73285600 | -2.80382000 |
| H | -1.54541700 | 0.13864600  | -3.13856200 |
| H | -0.23580100 | -0.97449000 | -3.58002200 |
| H | -1.68133500 | -1.56050600 | -2.72811000 |

## TSJ8

E= -2492.57257au

|   |             |             |             |
|---|-------------|-------------|-------------|
| P | -1.96984400 | 0.13505500  | 0.01373700  |
| B | 1.56830400  | 0.10335500  | -0.51242300 |
| O | 0.61709100  | 0.01558500  | 1.51241300  |
| O | -0.05777300 | -0.93376400 | 3.45433500  |
| C | -0.96169400 | 0.14067600  | -1.52096700 |
| H | -1.50479200 | 0.21163000  | -2.46405100 |
| C | 0.38571400  | 0.17235800  | -1.57882400 |
| C | 0.81187000  | -0.65594300 | 2.66866000  |
| C | -2.95866500 | -1.43542200 | 0.21022600  |
| C | -2.97644200 | -2.55109700 | -0.66340600 |
| C | -3.71982900 | -3.68306900 | -0.30478500 |
| H | -3.72375400 | -4.53330500 | -0.98392100 |
| C | -4.45071500 | -3.76215100 | 0.88065200  |
| C | -4.40008600 | -2.66581600 | 1.74233300  |
| H | -4.93733500 | -2.70631700 | 2.68769100  |
| C | -3.65951700 | -1.51780500 | 1.44498900  |
| C | -2.23242600 | -2.61715900 | -1.97993700 |
| H | -1.15923800 | -2.46504100 | -1.84594000 |
| H | -2.58063900 | -1.86456200 | -2.69614800 |
| H | -2.37891300 | -3.59743500 | -2.44388700 |
| C | -5.27364400 | -4.98340000 | 1.21541000  |
| H | -6.31946200 | -4.85525900 | 0.90469200  |
| H | -5.27884500 | -5.17947300 | 2.29320000  |
| H | -4.89074400 | -5.87594400 | 0.70954700  |
| C | -3.61248700 | -0.42019400 | 2.48883200  |
| H | -3.93198800 | 0.55149500  | 2.09697200  |
| H | -2.59632500 | -0.30552100 | 2.88704500  |
| H | -4.26878000 | -0.66899400 | 3.32844100  |
| C | -3.16466700 | 1.53949800  | -0.30623600 |
| C | -4.36031900 | 1.43809500  | -1.05961200 |
| C | -5.18264600 | 2.56496300  | -1.18985500 |
| H | -6.10013500 | 2.47228800  | -1.76761400 |
| C | -4.86586000 | 3.79555300  | -0.61515600 |

|   |             |             |             |
|---|-------------|-------------|-------------|
| C | -3.67297700 | 3.88591600  | 0.10468200  |
| H | -3.39409900 | 4.83734200  | 0.55310900  |
| C | -2.81850200 | 2.79155200  | 0.26853600  |
| C | -4.81159500 | 0.17295300  | -1.75542600 |
| H | -5.63120300 | 0.39554400  | -2.44579600 |
| H | -5.16355600 | -0.58495000 | -1.04866200 |
| H | -4.00588400 | -0.28407700 | -2.33725000 |
| C | -5.76101500 | 4.99858700  | -0.79538200 |
| H | -5.78746300 | 5.61762000  | 0.10827200  |
| H | -6.78755500 | 4.70226700  | -1.03463800 |
| H | -5.40528500 | 5.63799500  | -1.61447400 |
| C | -1.53064200 | 3.01343100  | 1.03439400  |
| H | -1.48056000 | 4.04300900  | 1.40230100  |
| H | -0.65705100 | 2.84892000  | 0.39426000  |
| H | -1.43619300 | 2.34401800  | 1.89616500  |
| C | 2.34457600  | 1.42964000  | -0.10213500 |
| C | 3.35361100  | 1.42250300  | 0.87389700  |
| F | 3.68527400  | 0.27379600  | 1.49591000  |
| C | 4.04463900  | 2.55692600  | 1.27997800  |
| F | 4.99539500  | 2.48259900  | 2.21807100  |
| C | 3.73470000  | 3.78648600  | 0.70156800  |
| F | 4.38714700  | 4.88736700  | 1.07618500  |
| C | 2.73361700  | 3.85624900  | -0.26048000 |
| F | 2.41802500  | 5.03341800  | -0.81279600 |
| C | 2.05811500  | 2.69486800  | -0.63269400 |
| F | 1.08582500  | 2.85579400  | -1.54903700 |
| C | 2.32290700  | -1.30588500 | -0.48650600 |
| C | 3.66029900  | -1.45075900 | -0.87318900 |
| F | 4.38623400  | -0.37100100 | -1.21988200 |
| C | 4.30496000  | -2.68265500 | -0.94578200 |
| F | 5.58537300  | -2.76311700 | -1.32580800 |
| C | 3.60316500  | -3.84060400 | -0.62170600 |
| F | 4.20549400  | -5.02994000 | -0.68173300 |
| C | 2.26716100  | -3.75069400 | -0.23952600 |
| F | 1.58521000  | -4.85913100 | 0.06955300  |
| C | 1.65634500  | -2.50041600 | -0.19147500 |
| F | 0.36048600  | -2.47728000 | 0.17780400  |
| H | -0.38259600 | 0.14091200  | 1.30979800  |
| H | 1.87778800  | -0.88934600 | 2.79613000  |
| C | 1.02223600  | 0.20984500  | -2.97307000 |
| H | 1.82997400  | 0.94649600  | -3.04546900 |
| H | 1.45754900  | -0.76623800 | -3.22332100 |
| H | 0.27737300  | 0.45503700  | -3.73682600 |

## K<sub>5</sub>

E= -2683.1350491au

|   |           |           |           |
|---|-----------|-----------|-----------|
| C | 1.896643  | -2.440081 | -0.806324 |
| C | 2.801508  | -3.376337 | -0.244966 |
| C | 2.999549  | -4.606367 | -0.885305 |
| H | 3.700688  | -5.313390 | -0.445870 |
| C | 2.332720  | -4.955023 | -2.060245 |
| C | 1.438813  | -4.027307 | -2.596816 |
| H | 0.903980  | -4.274489 | -3.511857 |
| C | 1.204144  | -2.784856 | -1.997257 |
| C | 3.591601  | -3.125427 | 1.020581  |
| H | 2.962584  | -2.759394 | 1.836986  |
| H | 4.379950  | -2.380860 | 0.870852  |
| H | 4.064977  | -4.051888 | 1.360751  |
| C | 2.547564  | -6.300309 | -2.712902 |
| H | 3.534720  | -6.709449 | -2.473290 |
| H | 2.461442  | -6.234922 | -3.803051 |
| H | 1.800519  | -7.030121 | -2.372496 |
| C | 0.185683  | -1.873541 | -2.652085 |
| H | 0.569027  | -0.862389 | -2.817490 |
| H | -0.711094 | -1.781133 | -2.030232 |
| H | -0.124400 | -2.285625 | -3.617950 |
| C | 3.171746  | -0.029725 | 0.450440  |
| C | 3.559562  | 0.316783  | 1.771232  |
| C | 4.782017  | 0.971724  | 1.975078  |
| H | 5.066899  | 1.224247  | 2.994662  |
| C | 5.646692  | 1.303395  | 0.932437  |
| C | 5.248904  | 0.965795  | -0.361232 |
| H | 5.896781  | 1.214969  | -1.199513 |
| C | 4.033197  | 0.327111  | -0.624985 |
| C | 2.748306  | 0.010404  | 3.013834  |
| H | 3.225130  | 0.461014  | 3.889974  |
| H | 2.679624  | -1.066287 | 3.206193  |
| H | 1.727670  | 0.394553  | 2.961235  |
| C | 6.945474  | 2.030084  | 1.190213  |
| H | 7.716411  | 1.742203  | 0.467006  |
| H | 7.328087  | 1.822854  | 2.195335  |
| H | 6.815866  | 3.117922  | 1.109428  |
| C | 3.690292  | 0.049518  | -2.073734 |
| H | 4.448059  | 0.482694  | -2.733829 |
| H | 2.722136  | 0.483685  | -2.351718 |
| H | 3.634599  | -1.023293 | -2.288092 |

|   |           |           |           |
|---|-----------|-----------|-----------|
| C | -2.786063 | 0.094976  | 0.034037  |
| C | -3.197684 | -1.184804 | -0.372621 |
| F | -2.359606 | -2.230031 | -0.274891 |
| C | -4.445564 | -1.445509 | -0.928825 |
| F | -4.778025 | -2.680401 | -1.319516 |
| C | -5.356420 | -0.402103 | -1.076363 |
| F | -6.560425 | -0.634173 | -1.597482 |
| C | -5.003433 | 0.885789  | -0.679743 |
| F | -5.880065 | 1.886807  | -0.811937 |
| C | -3.739258 | 1.111487  | -0.145970 |
| C | -0.688486 | 1.764759  | 0.502523  |
| C | -0.070106 | 2.437878  | 1.561425  |
| F | -0.115356 | 1.921667  | 2.806328  |
| C | 0.582130  | 3.658856  | 1.413017  |
| F | 1.145954  | 4.266913  | 2.461818  |
| C | 0.634261  | 4.250635  | 0.153988  |
| F | 1.257418  | 5.416984  | -0.014720 |
| C | 0.022893  | 3.622257  | -0.930621 |
| F | 0.073870  | 4.191765  | -2.143861 |
| C | -0.631084 | 2.413912  | -0.737548 |
| F | -1.196047 | 1.841199  | -1.818543 |
| F | -3.471202 | 2.371529  | 0.234974  |
| B | -1.374807 | 0.358185  | 0.682990  |
| P | 1.521954  | -0.735507 | -0.096615 |
| C | -0.722435 | -0.758909 | 1.584480  |
| C | 0.526154  | -1.241670 | 1.377388  |
| H | 0.882368  | -2.044195 | 2.022640  |
| C | -1.567895 | -1.343900 | 2.668566  |
| C | -2.282514 | -0.506626 | 3.543491  |
| C | -1.679687 | -2.735147 | 2.835708  |
| C | -3.067736 | -1.042519 | 4.564212  |
| H | -2.189921 | 0.571764  | 3.447944  |
| C | -2.467899 | -3.270239 | 3.854023  |
| H | -1.162346 | -3.394861 | 2.145319  |
| C | -3.163899 | -2.426372 | 4.722824  |
| H | -3.601324 | -0.377673 | 5.238338  |
| H | -2.545028 | -4.348812 | 3.963915  |
| H | -3.778754 | -2.844411 | 5.515260  |
| O | -0.967590 | 2.801182  | -4.837947 |
| C | 0.009191  | 2.335268  | -4.397693 |
| O | 0.994357  | 1.860751  | -3.980966 |

E= -2683.1119051au

|   |           |           |           |
|---|-----------|-----------|-----------|
| C | 3.431065  | -1.723844 | -0.493152 |
| C | 4.796166  | -1.331843 | -0.441620 |
| C | 5.783862  | -2.323373 | -0.376693 |
| H | 6.824139  | -2.008497 | -0.329393 |
| C | 5.490865  | -3.686115 | -0.379871 |
| C | 4.152047  | -4.051879 | -0.513505 |
| H | 3.895095  | -5.106799 | -0.580212 |
| C | 3.120326  | -3.111212 | -0.597195 |
| C | 5.297573  | 0.098268  | -0.494144 |
| H | 5.107952  | 0.651912  | 0.429762  |
| H | 4.842904  | 0.670562  | -1.306712 |
| H | 6.379236  | 0.097116  | -0.659002 |
| C | 6.579897  | -4.724024 | -0.255882 |
| H | 7.527976  | -4.362429 | -0.667891 |
| H | 6.312774  | -5.649794 | -0.776490 |
| H | 6.759906  | -4.982966 | 0.796272  |
| C | 1.734276  | -3.651286 | -0.891191 |
| H | 1.426623  | -3.378562 | -1.906906 |
| H | 0.957597  | -3.285411 | -0.216717 |
| H | 1.737625  | -4.743590 | -0.830470 |
| C | 2.456858  | 1.194029  | -0.106586 |
| C | 2.757083  | 1.585768  | 1.223722  |
| C | 2.977302  | 2.939441  | 1.497401  |
| H | 3.199550  | 3.232745  | 2.521108  |
| C | 2.921625  | 3.922366  | 0.506404  |
| C | 2.684173  | 3.508506  | -0.805172 |
| H | 2.675988  | 4.249847  | -1.601439 |
| C | 2.449828  | 2.168818  | -1.135736 |
| C | 2.881816  | 0.615122  | 2.377910  |
| H | 3.486067  | 1.057360  | 3.176425  |
| H | 3.357097  | -0.325234 | 2.082181  |
| H | 1.901083  | 0.374876  | 2.800124  |
| C | 3.078689  | 5.383644  | 0.848068  |
| H | 3.469146  | 5.957571  | 0.001365  |
| H | 3.749271  | 5.529051  | 1.701630  |
| H | 2.105433  | 5.812347  | 1.119706  |
| C | 2.203545  | 1.848013  | -2.595966 |
| H | 2.559659  | 2.669472  | -3.225117 |
| H | 1.134112  | 1.722298  | -2.801739 |
| H | 2.706847  | 0.935036  | -2.926945 |
| C | -2.738382 | -0.754931 | -0.324800 |
| C | -2.730425 | -2.086118 | -0.763495 |

TSK56

F -1.571869 -2.764449 -0.855058  
 C -3.879689 -2.776229 -1.133676  
 F -3.811728 -4.044279 -1.557687  
 C -5.113945 -2.136249 -1.053505  
 F -6.229717 -2.783744 -1.396504  
 C -5.177845 -0.819429 -0.608066  
 F -6.362902 -0.203290 -0.515284  
 C -4.003469 -0.158544 -0.258677  
 C -1.297675 1.559584 0.041675  
 C -0.701225 2.324814 1.052210  
 F -0.239194 1.741044 2.174952  
 C -0.579513 3.709998 0.992677  
 F 0.000660 4.392204 1.991003  
 C -1.050168 4.388576 -0.124837  
 F -0.915704 5.714590 -0.208278  
 C -1.665849 3.677805 -1.152654  
 F -2.133450 4.329685 -2.224108  
 C -1.790861 2.296416 -1.047954  
 F -2.412108 1.675625 -2.059271  
 F -4.142655 1.103816 0.187676  
 B -1.400451 -0.020413 0.110971  
 P 1.979029 -0.552398 -0.545511  
 C -0.404547 -0.869814 1.020274  
 C 0.914471 -1.111107 0.842293  
 H 1.418642 -1.757842 1.559222  
 C -1.068096 -1.521503 2.198953  
 C -1.944774 -0.795177 3.024875  
 C -0.855100 -2.879717 2.493057  
 C -2.568408 -1.399743 4.116107  
 H -2.117938 0.258741 2.831881  
 C -1.481757 -3.485125 3.582043  
 H -0.210920 -3.470541 1.848904  
 C -2.340192 -2.747507 4.399627  
 H -3.232432 -0.814312 4.746506  
 H -1.306143 -4.538335 3.785162  
 H -2.830310 -3.219834 5.246563  
 O -0.511863 -0.330903 -2.000808  
 C 0.516724 -0.805506 -2.421789  
 O 1.115641 -1.326964 -3.308407

**K<sub>6</sub>**

E= -2683.1382899au

C 0.919176 -0.796548 -1.723855

O 1.406838 -1.252489 -2.735363  
 O -0.311829 -0.461984 -1.533221  
 C 3.492992 -1.669525 -0.311977  
 C 4.843119 -1.223537 -0.266986  
 C 5.864816 -2.179226 -0.310019  
 H 6.894452 -1.831946 -0.274852  
 C 5.617723 -3.548173 -0.399923  
 C 4.287898 -3.960344 -0.476541  
 H 4.066695 -5.020227 -0.576918  
 C 3.216180 -3.063301 -0.447447  
 C 5.294882 0.221809 -0.194961  
 H 5.000491 0.713265 0.736024  
 H 4.899120 0.825619 -1.015407  
 H 6.385959 0.262623 -0.254990  
 C 6.746391 -4.549556 -0.405148  
 H 7.692276 -4.086553 -0.703269  
 H 6.540909 -5.380205 -1.088801  
 H 6.891203 -4.980793 0.594256  
 C 1.836858 -3.660337 -0.632161  
 H 1.482839 -3.493401 -1.654896  
 H 1.080550 -3.246579 0.036901  
 H 1.873927 -4.740258 -0.464234  
 C 2.414299 1.262396 0.007235  
 C 2.584728 1.788023 1.315663  
 C 2.666143 3.172722 1.476795  
 H 2.783096 3.570981 2.481807  
 C 2.589230 4.057210 0.398423  
 C 2.510954 3.511088 -0.883152  
 H 2.508127 4.177080 -1.742898  
 C 2.428900 2.133395 -1.112815  
 C 2.711513 0.940431 2.563972  
 H 3.253368 1.497542 3.334453  
 H 3.258857 0.007408 2.392069  
 H 1.727526 0.685395 2.968206  
 C 2.560507 5.548947 0.615862  
 H 2.938715 6.092996 -0.255414  
 H 3.150546 5.841558 1.490702  
 H 1.528159 5.877383 0.792294  
 C 2.381796 1.681037 -2.556935  
 H 2.818367 2.454700 -3.195409  
 H 1.353367 1.522656 -2.901533  
 H 2.926578 0.751414 -2.737767  
 C -2.538462 -0.957528 -0.534004

C -2. 501465 -2. 308148 -0. 891828  
 F -1. 316212 -2. 960256 -0. 946143  
 C -3. 630598 -3. 065154 -1. 188065  
 F -3. 523045 -4. 358805 -1. 526404  
 C -4. 885115 -2. 466405 -1. 120227  
 F -5. 988219 -3. 172869 -1. 396538  
 C -4. 980192 -1. 129835 -0. 749573  
 F -6. 184377 -0. 545180 -0. 663858  
 C -3. 819704 -0. 410917 -0. 465127  
 C -1. 245768 1. 469173 -0. 184546  
 C -0. 859983 2. 283435 0. 879844  
 F -0. 436767 1. 750737 2. 050242  
 C -0. 866051 3. 676860 0. 827914  
 F -0. 435355 4. 404091 1. 874368  
 C -1. 280018 4. 318167 -0. 330605  
 F -1. 256428 5. 656364 -0. 404571  
 C -1. 702547 3. 554462 -1. 415619  
 F -2. 115992 4. 161501 -2. 537277  
 C -1. 679017 2. 165982 -1. 320671  
 F -2. 104354 1. 486886 -2. 401180  
 F -4. 005094 0. 870874 -0. 076843  
 B -1. 128484 -0. 170551 -0. 237768  
 P 2. 044429 -0. 537467 -0. 188547  
 C -0. 389741 -0. 842582 1. 069163  
 C 0. 945358 -1. 065451 1. 135948  
 H 1. 418679 -1. 535117 1. 994195  
 C -1. 213408 -1. 306578 2. 223378  
 C -2. 336023 -0. 574168 2. 652328  
 C -0. 901102 -2. 494520 2. 910163  
 C -3. 089837 -0. 994769 3. 746463  
 H -2. 622952 0. 332810 2. 132955  
 C -1. 663865 -2. 922877 3. 995700  
 H -0. 071744 -3. 107938 2. 569655  
 C -2. 757797 -2. 169421 4. 424612  
 H -3. 945075 -0. 404835 4. 064815  
 H -1. 408326 -3. 851393 4. 499486  
 H -3. 353829 -2. 501147 5. 270442

**K7**

**E= -2684.314811au**

C 0. 93486000 -0. 79210700 -1. 67436800  
 O 1. 43921900 -1. 25129000 -2. 67696200  
 O -0. 30275100 -0. 47611800 -1. 50092400

C 3. 50374600 -1. 61507900 -0. 22710200  
 C 4. 84770300 -1. 15195900 -0. 17148500  
 C 5. 88124700 -2. 09558800 -0. 19294500  
 H 6. 90616000 -1. 73563500 -0. 14968400  
 C 5. 65173100 -3. 46824200 -0. 27146200  
 C 4. 32787100 -3. 89759600 -0. 35777400  
 H 4. 12064300 -4. 96114400 -0. 44885900  
 C 3. 24518800 -3. 01358500 -0. 34974100  
 C 5. 28102800 0. 29947800 -0. 10949300  
 H 4. 96616500 0. 79854600 0. 81066700  
 H 4. 89132900 0. 88863500 -0. 94344500  
 H 6. 37234200 0. 35275100 -0. 15291500  
 C 6. 79213200 -4. 45610100 -0. 25510000  
 H 7. 73970700 -3. 97972200 -0. 52519500  
 H 6. 61408900 -5. 28342500 -0. 95049700  
 H 6. 91591500 -4. 89410600 0. 74414100  
 C 1. 87518800 -3. 62983000 -0. 54127000  
 H 1. 53260900 -3. 48644100 -1. 57149400  
 H 1. 10526100 -3. 21295100 0. 11006300  
 H 1. 92240000 -4. 70599300 -0. 35303200  
 C 2. 38441300 1. 30756700 0. 04193900  
 C 2. 52956800 1. 85479600 1. 34452100  
 C 2. 58741800 3. 24290600 1. 48614300  
 H 2. 68454100 3. 65747400 2. 48663900  
 C 2. 51147600 4. 11022000 0. 39389500  
 C 2. 46045400 3. 54404000 -0. 88046000  
 H 2. 46028200 4. 19700200 -1. 75015200  
 C 2. 40248500 2. 16215600 -1. 09068400  
 C 2. 65311800 1. 02770400 2. 60683600  
 H 3. 17803600 1. 60375400 3. 37511900  
 H 3. 21545600 0. 10006400 2. 45538800  
 H 1. 66805500 0. 76491300 3. 00336200  
 C 2. 45490100 5. 60435100 0. 58777700  
 H 2. 85324400 6. 14098900 -0. 27915800  
 H 3. 01208200 5. 91832400 1. 47654700  
 H 1. 41284400 5. 92031600 0. 72563600  
 C 2. 38425700 1. 68782200 -2. 52833800  
 H 2. 82197300 2. 45711100 -3. 17129200  
 H 1. 36366700 1. 51174500 -2. 88731600  
 H 2. 94325100 0. 76251300 -2. 68600300  
 C -2. 53393600 -0. 98568200 -0. 51925100  
 C -2. 47746900 -2. 33919700 -0. 86327700  
 F -1. 28411800 -2. 97760500 -0. 90040300

|   |             |             |             |   |             |             |             |
|---|-------------|-------------|-------------|---|-------------|-------------|-------------|
| C | -3.59491600 | -3.11234300 | -1.16223100 | O | 1.28417400  | -0.43604200 | -3.16962600 |
| F | -3.46911800 | -4.40778500 | -1.48682500 | C | 0.98148600  | -0.38976800 | 1.10906200  |
| C | -4.85702400 | -2.52796300 | -1.11161300 | H | 1.40337000  | -0.47995400 | 2.10550200  |
| F | -5.94895300 | -3.25035900 | -1.39078900 | C | -0.36348800 | -0.30279200 | 0.98750800  |
| C | -4.97140800 | -1.18904500 | -0.75503400 | C | 0.66266900  | -0.59904600 | -2.15101000 |
| F | -6.18308000 | -0.61791400 | -0.68589800 | C | 3.53506600  | -1.53907000 | -0.15343700 |
| C | -3.82213900 | -0.45365500 | -0.46739400 | C | 3.54750100  | -2.66033100 | 0.71564500  |
| C | -1.27579800 | 1.46093900  | -0.18939600 | C | 4.60254400  | -3.57869900 | 0.61675100  |
| C | -0.91491900 | 2.29459800  | 0.86864200  | H | 4.60438500  | -4.43225300 | 1.29072600  |
| F | -0.50194800 | 1.78354000  | 2.05226500  | C | 5.63749600  | -3.44723500 | -0.30642700 |
| C | -0.93661200 | 3.68695100  | 0.79672500  | C | 5.58249500  | -2.36229000 | -1.18360200 |
| F | -0.52832400 | 4.43390400  | 1.83816700  | H | 6.35707000  | -2.25008900 | -1.93926100 |
| C | -1.34173600 | 4.30673800  | -0.37650300 | C | 4.55317100  | -1.41891800 | -1.14324100 |
| F | -1.33113200 | 5.64396800  | -0.46960500 | C | 2.50374600  | -2.96213200 | 1.77260600  |
| C | -1.74045900 | 3.52295600  | -1.45616000 | H | 1.48029300  | -2.85555600 | 1.40752000  |
| F | -2.14508000 | 4.10926700  | -2.59191000 | H | 2.60277400  | -2.30797400 | 2.64712400  |
| C | -1.70202800 | 2.13630900  | -1.34104700 | H | 2.62550700  | -3.98935700 | 2.12796100  |
| F | -2.10446800 | 1.43680100  | -2.41732100 | C | 6.76936300  | -4.44397800 | -0.37123400 |
| F | -4.02585900 | 0.82964300  | -0.09330900 | H | 6.91842500  | -4.81226700 | -1.39302300 |
| B | -1.13746300 | -0.17755000 | -0.21795600 | H | 6.58196500  | -5.30679100 | 0.27527200  |
| P | 2.04091700  | -0.49976600 | -0.13167800 | H | 7.71583200  | -3.98845700 | -0.05284500 |
| C | -0.40288800 | -0.82203900 | 1.10510900  | C | 4.58446800  | -0.31569400 | -2.18225200 |
| C | 0.93458500  | -1.02506600 | 1.18785000  | H | 4.84917100  | 0.65421900  | -1.74823300 |
| H | 1.40599400  | -1.47665000 | 2.05675400  | H | 3.62188500  | -0.20161400 | -2.69216700 |
| C | -1.23172300 | -1.28306300 | 2.25675900  | H | 5.32756500  | -0.54931100 | -2.95029500 |
| C | -2.37085800 | -0.56303600 | 2.66260400  | C | 2.96304200  | 1.42793100  | -0.03981800 |
| C | -0.90809200 | -2.45584900 | 2.96411600  | C | 2.65352100  | 2.51186100  | -0.89493900 |
| C | -3.13026400 | -0.98035600 | 3.75410000  | C | 3.22447700  | 3.76272400  | -0.63469900 |
| H | -2.66648500 | 0.33184300  | 2.12742300  | H | 2.98071900  | 4.58764300  | -1.29982900 |
| C | -1.67621400 | -2.88115800 | 4.04705500  | C | 4.08207000  | 3.98636300  | 0.44138600  |
| H | -0.06505700 | -3.06054400 | 2.64208000  | C | 4.37030900  | 2.90334800  | 1.27154500  |
| C | -2.78712400 | -2.13972600 | 4.45267500  | H | 5.03770400  | 3.04884200  | 2.11809800  |
| H | -3.99852100 | -0.40001500 | 4.05431100  | C | 3.83278400  | 1.62695600  | 1.06628700  |
| H | -1.41145900 | -3.79812400 | 4.56696200  | C | 1.73479000  | 2.40264000  | -2.08556600 |
| H | -3.38745800 | -2.46916400 | 5.29634900  | H | 1.69855600  | 3.35264300  | -2.62618200 |
| H | 2.82255700  | -2.55198400 | -5.42130400 | H | 0.71202100  | 2.15842200  | -1.78441700 |
| H | 2.47436300  | -2.26529500 | -4.83011400 | H | 2.05321900  | 1.63158700  | -2.79122900 |

## TSK78

E= -2684.172729au

|   |             |             |             |   |            |            |             |
|---|-------------|-------------|-------------|---|------------|------------|-------------|
| P | 2.16272800  | -0.26245800 | -0.27095600 | H | 4.65165300 | 5.35689000 | 0.71602400  |
| B | -1.25978400 | -0.08795700 | -0.36650500 | H | 4.80537700 | 5.91985500 | -0.21056400 |
| O | -0.33392000 | 0.00597500  | -1.63830700 | H | 5.60965600 | 5.29627300 | 1.24274300  |
|   |             |             |             | H | 3.96931000 | 5.94482000 | 1.34405500  |
|   |             |             |             | C | 4.25637300 | 0.55554100 | 2.05015800  |
|   |             |             |             | H | 4.73255200 | 1.02104100 | 2.91791800  |

|   |             |             |             |   |             |             |             |
|---|-------------|-------------|-------------|---|-------------|-------------|-------------|
| H | 4.97642200  | -0.14205900 | 1.61028200  | O | -0.42595200 | 0.82236500  | -3.34655800 |
| H | 3.41911500  | -0.03812800 | 2.42439200  | C | -1.00374000 | -0.07974600 | 1.26035300  |
| C | -1.97699900 | 1.39383400  | -0.46771800 | H | -1.47775300 | -0.14007200 | 2.23921700  |
| C | -3.12490000 | 1.62821000  | -1.23553600 | C | 0.34414100  | -0.21877500 | 1.16186000  |
| F | -3.72914700 | 0.62338800  | -1.89915700 | C | 0.44758300  | 0.68472800  | -2.51480500 |
| C | -3.71727400 | 2.88075700  | -1.38350700 | C | -2.74816700 | 1.64809500  | -0.70754400 |
| F | -4.82413500 | 3.02828900  | -2.12419200 | C | -2.47400800 | 2.87754000  | -0.05718800 |
| C | -3.14492100 | 3.98898600  | -0.76868900 | C | -2.91550300 | 4.05877900  | -0.66236600 |
| F | -3.69643300 | 5.20013100  | -0.90193800 | H | -2.70977800 | 5.00161700  | -0.16112200 |
| C | -1.98359100 | 3.82107000  | -0.02457500 | C | -3.59510800 | 4.07295800  | -1.88194300 |
| F | -1.39905300 | 4.87999900  | 0.55608200  | C | -3.84393700 | 2.84946500  | -2.50432800 |
| C | -1.42574400 | 2.54956200  | 0.09200900  | H | -4.36775400 | 2.83306300  | -3.45701500 |
| F | -0.26509200 | 2.49277700  | 0.79005200  | C | -3.43137800 | 1.63454200  | -1.95172200 |
| C | -2.33795700 | -1.32858800 | -0.50360800 | C | -1.70781600 | 3.01557700  | 1.23993800  |
| C | -3.53666200 | -1.29982900 | 0.22221600  | H | -0.64438900 | 2.82728700  | 1.07716900  |
| F | -3.83455200 | -0.23430200 | 0.99080700  | H | -2.05004600 | 2.33071100  | 2.01854700  |
| C | -4.48686900 | -2.31573300 | 0.19914900  | H | -1.81296600 | 4.03369500  | 1.62640900  |
| F | -5.61086800 | -2.21677100 | 0.92143600  | C | -4.01931500 | 5.37311300  | -2.52002800 |
| C | -4.26528600 | -3.44422700 | -0.58430800 | H | -3.21437300 | 5.77804400  | -3.14733200 |
| F | -5.16396100 | -4.43447800 | -0.61888000 | H | -4.25752400 | 6.13162800  | -1.76697300 |
| C | -3.09498700 | -3.52642400 | -1.32745400 | H | -4.89631900 | 5.23844000  | -3.16141300 |
| F | -2.85651400 | -4.60355900 | -2.08965100 | C | -3.69450000 | 0.37229000  | -2.74085800 |
| C | -2.17196700 | -2.48245600 | -1.26918500 | H | -4.16336600 | -0.41640700 | -2.14247900 |
| F | -1.06046400 | -2.66533300 | -2.02982100 | H | -2.74910100 | -0.00055500 | -3.15488300 |
| H | 0.85951200  | -1.76346000 | -1.58861000 | H | -4.36178300 | 0.58361600  | -3.58105800 |
| H | 1.42883100  | -1.22627400 | -1.14441800 | C | -3.70515600 | -0.95772200 | 0.56001000  |
| C | -1.09786600 | -0.43589200 | 2.29662400  | C | -4.65964200 | -0.42182800 | 1.45995100  |
| C | -1.53363800 | -1.69801700 | 2.73058400  | C | -5.73995800 | -1.21710800 | 1.85443100  |
| C | -1.31329000 | 0.67183400  | 3.12993400  | H | -6.46707200 | -0.79801500 | 2.54615800  |
| C | -2.17846000 | -1.84690000 | 3.95922400  | C | -5.91105600 | -2.52485600 | 1.39794400  |
| H | -1.36537300 | -2.56771400 | 2.10143400  | C | -4.94555000 | -3.04320700 | 0.53357800  |
| C | -1.95974500 | 0.52048700  | 4.35786600  | H | -5.04440600 | -4.06798700 | 0.18351300  |
| H | -0.96530000 | 1.64961400  | 2.81716100  | C | -3.84296100 | -2.29762000 | 0.10336700  |
| C | -2.39759600 | -0.73673600 | 4.77636900  | C | -4.56040000 | 0.96565600  | 2.05207800  |
| H | -2.50816400 | -2.83269300 | 4.27698900  | H | -5.42331700 | 1.16782000  | 2.69256900  |
| H | -2.11857700 | 1.39103000  | 4.98908000  | H | -4.52296500 | 1.74493100  | 1.28586900  |
| H | -2.90259500 | -0.85154700 | 5.73163100  | H | -3.66650100 | 1.07333100  | 2.67803700  |

## K8

E= -2684.341644au

|   |             |             |             |   |             |             |             |
|---|-------------|-------------|-------------|---|-------------|-------------|-------------|
| P | -2.24854700 | 0.00963000  | -0.03994300 | H | -7.49936100 | -3.02368200 | 2.78231800  |
| B | 1.22068900  | -0.11984700 | -0.23385600 | H | -6.85447600 | -4.41130800 | 1.88440200  |
| O | 0.19909000  | 0.30742200  | -1.26798200 | H | -7.91944800 | -3.25414900 | 1.08188800  |
|   |             |             |             | C | -2.85249800 | -2.99025200 | -0.81277100 |
|   |             |             |             | H | -3.14062400 | -4.03665600 | -0.94529700 |



|   |             |             |             |   |             |             |             |
|---|-------------|-------------|-------------|---|-------------|-------------|-------------|
| H | -1.83649100 | -2.98258100 | -0.40742600 | O | -0.29136800 | 0.90479600  | -3.78560900 |
| H | -2.82035700 | -2.53951600 | -1.81256800 | C | -1.01828900 | -0.20397400 | 1.18614300  |
| C | 1.82200500  | -1.56768900 | -0.77830800 | H | -1.49539400 | -0.34442800 | 2.15523200  |
| C | 2.83095000  | -1.63437400 | -1.74623400 | C | 0.33562200  | -0.22135000 | 1.16682400  |
| F | 3.42758300  | -0.50491800 | -2.18955100 | C | 0.58241700  | 0.67086400  | -2.99227200 |
| C | 3.28246700  | -2.81774900 | -2.32510200 | C | -3.16123200 | 1.43666200  | -0.29135000 |
| F | 4.25725200  | -2.80252000 | -3.24403000 | C | -3.13181900 | 2.49262400  | 0.65377000  |
| C | 2.70811300  | -4.02741900 | -1.94653600 | C | -3.91591400 | 3.63057800  | 0.42282200  |
| F | 3.12303800  | -5.17641800 | -2.49192600 | H | -3.88467700 | 4.43496400  | 1.15475700  |
| C | 1.69329000  | -4.02243000 | -0.99740500 | C | -4.72899400 | 3.77288400  | -0.70148700 |
| F | 1.11775600  | -5.17523300 | -0.62253300 | C | -4.72241200 | 2.73725100  | -1.63658100 |
| C | 1.28014100  | -2.81018000 | -0.44694900 | H | -5.32449700 | 2.83048700  | -2.53805200 |
| F | 0.28108700  | -2.90420100 | 0.46922300  | C | -3.94753000 | 1.58611400  | -1.46703300 |
| C | 2.38488600  | 1.03201200  | 0.00947600  | C | -2.29319000 | 2.49067400  | 1.91428300  |
| C | 3.67055000  | 0.74066700  | 0.47754700  | H | -1.23179600 | 2.35419700  | 1.69618400  |
| F | 4.04878400  | -0.53808800 | 0.69004200  | H | -2.58404000 | 1.69683000  | 2.61095200  |
| C | 4.63729700  | 1.70484800  | 0.75086000  | H | -2.40983900 | 3.44201600  | 2.44225300  |
| F | 5.85182200  | 1.35010900  | 1.19451300  | C | -5.59080800 | 4.99763900  | -0.89654900 |
| C | 4.33773300  | 3.04964300  | 0.55914600  | H | -6.61501200 | 4.82326800  | -0.53988000 |
| F | 5.25156000  | 3.99289100  | 0.81772300  | H | -5.66030600 | 5.27414500  | -1.95435700 |
| C | 3.07384900  | 3.39895000  | 0.09936800  | H | -5.19589300 | 5.85767000  | -0.34571200 |
| F | 2.76081400  | 4.69081800  | -0.08648900 | C | -3.95851100 | 0.55947900  | -2.58168400 |
| C | 2.13962300  | 2.39718400  | -0.15912300 | H | -4.26837100 | -0.43363600 | -2.23808500 |
| F | 0.92948700  | 2.83277100  | -0.59118300 | H | -2.96386400 | 0.46066000  | -3.03521600 |
| H | -1.84009700 | -0.71950800 | -1.15485000 | H | -4.65139900 | 0.86614800  | -3.37110100 |
| H | 1.51200700  | 0.86114500  | -2.73704200 | C | -3.27220900 | -1.57341500 | 0.03238400  |
| C | 1.05004100  | -0.35190200 | 2.47517300  | C | -4.36483000 | -1.57300900 | 0.93668000  |
| C | 1.99239600  | -1.36665800 | 2.71506700  | C | -5.14924800 | -2.72505100 | 1.05957300  |
| C | 0.77762800  | 0.55491100  | 3.51669200  | H | -5.98669100 | -2.71019800 | 1.75455700  |
| C | 2.61970400  | -1.47974100 | 3.95536700  | C | -4.89343200 | -3.88764200 | 0.32944800  |
| H | 2.23063900  | -2.07833100 | 1.93553300  | C | -3.80622100 | -3.87746300 | -0.54389600 |
| C | 1.41723900  | 0.45103200  | 4.75134500  | H | -3.57918600 | -4.77298800 | -1.11841100 |
| H | 0.07741700  | 1.36735100  | 3.34375000  | C | -2.99092400 | -2.75124700 | -0.70705000 |
| C | 2.33807600  | -0.57287300 | 4.97843600  | C | -4.73864700 | -0.38596900 | 1.79585200  |
| H | 3.33582800  | -2.28046300 | 4.11939500  | H | -5.48505100 | -0.67897200 | 2.54056900  |
| H | 1.19841100  | 1.17365600  | 5.53329200  | H | -5.15714900 | 0.43446900  | 1.20469200  |
| H | 2.83672700  | -0.65898300 | 5.94002600  | H | -3.87690200 | 0.01727600  | 2.33599500  |

## TSK8

E= -2684.302431au

|   |             |             |             |   |             |             |             |
|---|-------------|-------------|-------------|---|-------------|-------------|-------------|
| P | -2.13604900 | -0.12055300 | -0.27061600 | H | -5.60130200 | -5.82994000 | -0.31503400 |
| B | 1.44331100  | -0.04160500 | 0.00864500  | C | -1.81919700 | -2.86617400 | -1.66108000 |
| O | 0.38288100  | 0.04828400  | -1.80534000 | H | -1.81358500 | -3.85257100 | -2.13520000 |

|   |             |             |             |   |             |             |             |
|---|-------------|-------------|-------------|---|-------------|-------------|-------------|
| H | -0.86494200 | -2.74845500 | -1.13627300 | C | -4.11680600 | 3.59864600  | -2.11282200 |
| H | -1.85391600 | -2.11330400 | -2.45599600 | C | -3.47827200 | 3.70674300  | -0.87858700 |
| C | 2.28566500  | -1.30898800 | -0.48893700 | P | -1.75017000 | -0.15366600 | -0.48488900 |
| C | 3.32688800  | -1.19714700 | -1.42504200 | C | 0.75577200  | 0.45539500  | -3.73445500 |
| F | 3.63681900  | 0.00153600  | -1.96323600 | O | 0.90160200  | 1.61331500  | -3.77548600 |
| C | 4.07619200  | -2.27175800 | -1.88879200 | C | -3.28495600 | 0.02667100  | -3.08043000 |
| F | 5.06193200  | -2.08699700 | -2.77460100 | C | -4.84103700 | 4.77170400  | -2.72918000 |
| C | 3.78207000  | -3.55505200 | -1.43474000 | C | -2.12697000 | 2.93940300  | 1.04115900  |
| F | 4.48569500  | -4.60108900 | -1.87039000 | C | -0.79648800 | -0.04169900 | 1.21231500  |
| C | 2.73264300  | -3.73398400 | -0.54174400 | C | 0.45566200  | -0.89171700 | 0.94277000  |
| F | 2.41269900  | -4.96424500 | -0.12306200 | B | 1.95016300  | -0.39006000 | 0.75748200  |
| C | 2.00468500  | -2.62749700 | -0.10666900 | O | 0.59942400  | -0.70523300 | -3.72257400 |
| F | 0.96447200  | -2.90705000 | 0.69952500  | C | 2.34517100  | 1.15495600  | 0.92687800  |
| C | 2.11826100  | 1.41801900  | -0.01353400 | C | 1.79371900  | 2.18965200  | 0.17123200  |
| C | 3.46201400  | 1.63905200  | 0.31487000  | C | 2.17998700  | 3.52154400  | 0.30679100  |
| F | 4.26247900  | 0.60348300  | 0.62396000  | C | 3.17144000  | 3.85332100  | 1.22689000  |
| C | 4.03623300  | 2.90533200  | 0.37763300  | C | 3.75820800  | 2.85356900  | 1.99915300  |
| F | 5.32656800  | 3.05525000  | 0.69927600  | C | 3.33595000  | 1.53712000  | 1.83384400  |
| C | 3.25413300  | 4.02631900  | 0.11087000  | F | 0.82322000  | 1.92754100  | -0.72725000 |
| F | 3.78986200  | 5.24771300  | 0.16425900  | F | 3.92590000  | 0.59858000  | 2.60587500  |
| C | 1.90878600  | 3.86254000  | -0.20443500 | F | 4.71024800  | 3.16690600  | 2.88807300  |
| F | 1.14479500  | 4.93182300  | -0.45495500 | F | 3.55366200  | 5.12584900  | 1.37331600  |
| C | 1.37123300  | 2.57791200  | -0.24766000 | F | 1.60154000  | 4.48154400  | -0.42530800 |
| F | 0.05881100  | 2.49199500  | -0.54551700 | C | 2.95878600  | -1.30988700 | -0.09256700 |
| H | -0.61832200 | -0.06983600 | -1.59167600 | C | 3.31087600  | -0.92596500 | -1.38934800 |
| H | 1.64673300  | 0.90511400  | -3.12739600 | C | 4.14680100  | -1.66650300 | -2.21878100 |
| C | 0.97990500  | -0.43337000 | 2.52134300  | C | 4.67738100  | -2.86645700 | -1.75222800 |
| C | 1.84425200  | 0.51144100  | 3.10093400  | C | 4.35789000  | -3.29792400 | -0.46883500 |
| C | 0.66738900  | -1.58420500 | 3.26978600  | C | 3.51819300  | -2.51867500 | 0.32438500  |
| C | 2.38012900  | 0.31107500  | 4.37445600  | F | 2.82328700  | 0.22790400  | -1.89663100 |
| H | 2.07284900  | 1.43010300  | 2.57466700  | F | 4.43983000  | -1.23956900 | -3.45294600 |
| C | 1.20647000  | -1.78550300 | 4.53931000  | F | 5.48247900  | -3.59728100 | -2.52953400 |
| H | 0.00280200  | -2.32698000 | 2.84308600  | F | 4.85895200  | -4.45031500 | -0.00535900 |
| C | 2.07018300  | -0.84061000 | 5.09707500  | F | 3.25308900  | -3.01557100 | 1.56341400  |
| H | 3.03707400  | 1.06403800  | 4.80177400  | C | -3.06078900 | -1.46764800 | -0.20183400 |
| H | 0.95082300  | -2.68533100 | 5.09279500  | C | -4.29532000 | -1.25826200 | 0.47159400  |
| H | 2.49201400  | -0.99854800 | 6.08591000  | C | -5.21293500 | -2.30916000 | 0.56930900  |

## L5

E= -2739.70154au

|   |             |            |             |   |             |             |             |
|---|-------------|------------|-------------|---|-------------|-------------|-------------|
| C | -2.78005300 | 2.64512900 | -0.28958100 | C | -4.96592700 | -3.57358300 | 0.02925900  |
| C | -2.71502100 | 1.39231100 | -0.95114800 | C | -3.75390100 | -3.76745900 | -0.63066700 |
| C | -3.33252300 | 1.28185700 | -2.23222300 | C | -2.80010700 | -2.74791400 | -0.76153600 |
| C | -4.02610400 | 2.37261500 | -2.76839500 | C | -4.68939800 | 0.05836800  | 1.10048500  |
|   |             |            |             | C | -5.97501500 | -4.68894400 | 0.16834300  |
|   |             |            |             | C | -1.52257000 | -3.10522700 | -1.50001500 |

|   |             |             |             |   |             |             |             |
|---|-------------|-------------|-------------|---|-------------|-------------|-------------|
| H | -0.48135400 | 0.99879000  | 1.27945300  | C | -3.74341700 | 0.88563100  | -2.19632900 |
| H | -4.50139200 | 2.25514200  | -3.74025300 | C | -4.65318000 | 1.80332900  | -2.73322300 |
| H | -3.52178800 | 4.65376300  | -0.34402800 | C | -4.87861200 | 3.05870100  | -2.17221300 |
| H | -3.53962800 | -4.74048200 | -1.06844200 | C | -4.14001700 | 3.38715400  | -1.03812900 |
| H | -6.15256800 | -2.13081600 | 1.08912700  | P | -1.73607400 | -0.04293500 | -0.49144700 |
| H | -3.67011700 | 0.23630000  | -4.08313000 | C | 0.00345000  | 0.31566100  | -2.30971100 |
| H | -2.26291900 | -0.35550400 | -3.18689100 | O | -0.61908200 | 0.68350300  | -3.24373000 |
| H | -3.88416100 | -0.78670800 | -2.65760300 | C | -3.62174300 | -0.43190700 | -2.93600000 |
| H | -2.37660700 | 2.19786800  | 1.80340000  | C | -5.88741500 | 4.01428300  | -2.76246600 |
| H | -1.03524000 | 2.98160600  | 0.94787000  | C | -2.49741400 | 3.02680700  | 0.76983700  |
| H | -2.45251500 | 3.91486900  | 1.41524400  | C | -0.78302300 | 0.23388300  | 1.18174300  |
| H | -5.62045500 | 4.44121600  | -3.42408400 | C | 0.55994900  | -0.57457600 | 1.07368900  |
| H | -5.31171100 | 5.39952700  | -1.96449200 | B | 1.77727200  | -0.08559300 | 0.15462900  |
| H | -4.15087200 | 5.41252300  | -3.29439600 | O | 1.04880300  | 0.03066300  | -1.78117200 |
| H | -1.68850700 | -3.97905100 | -2.13851000 | C | 2.28135100  | 1.43517900  | 0.35895000  |
| H | -1.14349800 | -2.28986800 | -2.11998100 | C | 1.60715800  | 2.58043300  | -0.07031300 |
| H | -0.71509500 | -3.37383600 | -0.80519000 | C | 2.06911800  | 3.87791600  | 0.13679700  |
| H | -5.72023600 | -5.54154300 | -0.46915700 | C | 3.26769100  | 4.07662200  | 0.81384300  |
| H | -6.02619000 | -5.05262900 | 1.20313200  | C | 3.97709600  | 2.97194300  | 1.27597300  |
| H | -6.98280500 | -4.35287100 | -0.10258600 | C | 3.47727900  | 1.69377000  | 1.04169600  |
| H | -4.99805600 | 0.79190000  | 0.34844500  | F | 0.42168400  | 2.48575000  | -0.71960900 |
| H | -5.52688500 | -0.08799800 | 1.79004900  | F | 4.20540400  | 0.66979200  | 1.53449500  |
| H | -3.86660500 | 0.50107000  | 1.66574100  | F | 5.12362400  | 3.14558200  | 1.94342100  |
| H | 0.23167400  | -1.88434500 | 0.55813600  | F | 3.72381700  | 5.31226900  | 1.03141100  |
| N | 1.40740400  | -1.03991600 | 2.11640700  | F | 1.36178600  | 4.92780200  | -0.29781200 |
| H | 1.67600900  | -1.98064300 | 2.38725200  | C | 2.89863500  | -1.14278500 | -0.30580200 |
| H | 1.20331500  | -0.45006900 | 2.91935700  | C | 3.86196400  | -0.77587800 | -1.25969500 |
| C | -1.43952600 | -0.42818400 | 2.53584500  | C | 4.84040800  | -1.63792000 | -1.74510900 |
| C | -1.43652600 | 0.48651700  | 3.60403500  | C | 4.89784700  | -2.94514100 | -1.27099200 |
| C | -1.92456100 | -1.72416700 | 2.78811200  | C | 3.97206600  | -3.36256800 | -0.32205300 |
| C | -1.93358100 | 0.13851100  | 4.86323100  | C | 3.00259500  | -2.46909700 | 0.12912900  |
| H | -1.03666600 | 1.48604000  | 3.45144400  | F | 3.87033800  | 0.46782200  | -1.76997200 |
| C | -2.42150000 | -2.07309600 | 4.04355600  | F | 5.72398600  | -1.22199600 | -2.66024800 |
| H | -1.92229500 | -2.46517600 | 1.99618100  | F | 5.83050200  | -3.78741200 | -1.72175900 |
| C | -2.43414900 | -1.14337600 | 5.08662200  | F | 4.01347900  | -4.61570700 | 0.14879500  |
| H | -1.92110300 | 0.87009500  | 5.66692500  | F | 2.15111300  | -2.97164100 | 1.05644600  |
| H | -2.79898700 | -3.07905300 | 4.20727200  | C | -2.67586700 | -1.64005000 | -0.25298300 |
| H | -2.82173000 | -1.41948900 | 6.06337200  | C | -3.92364000 | -1.70069800 | 0.42317100  |
|   |             |             |             | C | -4.56151600 | -2.94021400 | 0.55784900  |
|   |             |             |             | C | -4.01702000 | -4.12489700 | 0.06164400  |
|   |             |             |             | C | -2.79722400 | -4.04418500 | -0.61175200 |
|   |             |             |             | C | -2.12138600 | -2.83184500 | -0.79089000 |
|   |             |             |             | C | -4.63790800 | -0.49968400 | 1.00447300  |

## TSL56

E= -2739.655471au

|   |             |            |             |
|---|-------------|------------|-------------|
| C | -3.21828100 | 2.51075700 | -0.45198700 |
| C | -3.01837100 | 1.22500500 | -1.01530900 |

C -4.71103700 -5.45046300 0.26535700  
 C -0.84730800 -2.87172600 -1.61106000  
 H -0.54324400 1.29754900 1.17780000  
 H -5.19593900 1.51975200 -3.63265700  
 H -4.27739900 4.36587800 -0.58368100  
 H -2.35944000 -4.95035900 -1.02470700  
 H -5.51561300 -2.97591900 1.07967400  
 H -4.04142200 -0.32780400 -3.94115200  
 H -2.58392100 -0.74936500 -3.05315800  
 H -4.16326600 -1.23876700 -2.43140200  
 H -2.60855600 2.35261700 1.62047500  
 H -1.42974900 3.17140600 0.57804500  
 H -2.90596500 3.99731300 1.06657300  
 H -6.90491400 3.77616200 -2.42423600  
 H -5.67917400 5.04825100 -2.46864900  
 H -5.89179600 3.96622300 -3.85700100  
 H -0.57585300 -3.90816800 -1.83312000  
 H -0.97478200 -2.35619800 -2.57104500  
 H 0.00716300 -2.40849400 -1.11342800  
 H -4.49057100 -6.14831500 -0.54935300  
 H -4.38368000 -5.92719800 1.19905700  
 H -5.79765600 -5.32897100 0.32654000  
 H -5.14881900 0.07799700 0.22665300  
 H -5.39121600 -0.82837700 1.72694800  
 H -3.95885400 0.17839800 1.52442800  
 H 0.29609600 -1.61295900 0.86624400  
 N 1.20573300 -0.60255300 2.41526500  
 C -1.48542700 -0.08926600 2.49531100  
 C -1.67555100 0.91788900 3.45362800  
 C -1.85501400 -1.39817800 2.84507100  
 C -2.26209800 0.64610500 4.69166100  
 H -1.33375000 1.92810500 3.24536900  
 C -2.43969600 -1.67473400 4.07974200  
 H -1.67502900 -2.21403400 2.15482600  
 C -2.65761900 -0.65291000 5.00672200  
 H -2.39569300 1.45001500 5.41093700  
 H -2.71810400 -2.69729700 4.32139200  
 H -3.11345000 -0.87140500 5.96870300  
 H 1.84409900 -1.38741200 2.49244800  
 H 1.71483100 0.25349600 2.62029000

C -3.12728800 2.50173100 -0.53328100  
 C -2.97878400 1.18725900 -1.04944000  
 C -3.76053400 0.78997200 -2.17638200  
 C -4.64544400 1.71872800 -2.73638200  
 C -4.79860600 3.01524500 -2.25038000  
 C -4.03306300 3.37551200 -1.14448800  
 P -1.72669300 -0.03624300 -0.39430600  
 C -0.37002000 0.02608900 -1.80707100  
 O -0.79489100 0.10822100 -2.93844700  
 C -3.77023000 -0.57993500 -2.82877800  
 C -5.73640500 3.99540600 -2.91055900  
 C -2.38497700 3.05455100 0.66023000  
 C -0.75282800 0.27521800 1.21899500  
 C 0.59335800 -0.53632300 1.11307500  
 B 1.59452400 -0.05075200 -0.09987600  
 O 0.86281700 0.00337300 -1.45603400  
 C 2.17815400 1.46037300 0.21366900  
 C 1.55911300 2.63511900 -0.20869900  
 C 2.02917200 3.91704100 0.06724300  
 C 3.19563300 4.06717900 0.80726200  
 C 3.85381500 2.92960100 1.26552700  
 C 3.33668000 1.67232500 0.96590100  
 F 0.38719800 2.58859100 -0.90530100  
 F 4.02764500 0.61931800 1.46434500  
 F 4.97273300 3.05553600 1.99289900  
 F 3.66885900 5.28701800 1.09078200  
 F 1.35708500 4.99788100 -0.35984200  
 C 2.82299000 -1.10342500 -0.43808000  
 C 3.72750300 -0.76826900 -1.45480900  
 C 4.77005100 -1.59091300 -1.87202200  
 C 4.95018500 -2.82796200 -1.26007600  
 C 4.08253400 -3.21174600 -0.24569500  
 C 3.05015700 -2.35470200 0.13729100  
 F 3.61752100 0.41443700 -2.08958500  
 F 5.59998200 -1.20567700 -2.85212000  
 F 5.94437100 -3.63742000 -1.64535800  
 F 4.23847600 -4.40251100 0.35477700  
 F 2.25808000 -2.82494700 1.13402300  
 C -2.56053700 -1.68623000 -0.25490500  
 C -3.81542500 -1.74174900 0.41234000  
 C -4.44959600 -2.98202900 0.54883600  
 C -3.89838900 -4.16595700 0.06154500  
 C -2.66623500 -4.08547500 -0.58913600

**L6**

E= -2739.681707au

|   |             |             |             |
|---|-------------|-------------|-------------|
| C | -1.97974600 | -2.87955700 | -0.76630300 |
| C | -4.55363600 | -0.54621700 | 0.98128900  |
| C | -4.59230900 | -5.49276300 | 0.25058200  |
| C | -0.67456700 | -2.95199200 | -1.52969000 |
| H | -0.49309000 | 1.33341800  | 1.19813400  |
| H | -5.23492900 | 1.40554200  | -3.59469600 |
| H | -4.13403200 | 4.37709300  | -0.73408500 |
| H | -2.21717400 | -4.99396800 | -0.98291200 |
| H | -5.40775000 | -3.01628600 | 1.06211300  |
| H | -4.20954100 | -0.49641500 | -3.82697300 |
| H | -2.77191600 | -0.99273600 | -2.95361800 |
| H | -4.37807100 | -1.29352500 | -2.26193600 |
| H | -2.48855300 | 2.41367000  | 1.53704000  |
| H | -1.32242700 | 3.19147100  | 0.44406800  |
| H | -2.78959400 | 4.03465600  | 0.92689700  |
| H | -6.12693400 | 4.72360000  | -2.19217100 |
| H | -5.21895700 | 4.55902100  | -3.69804200 |
| H | -6.58489100 | 3.48595200  | -3.37897500 |
| H | -0.41919600 | -3.99670000 | -1.72541100 |
| H | -0.73867100 | -2.44470600 | -2.49796600 |
| H | 0.16430200  | -2.51442500 | -0.98457100 |
| H | -4.49632200 | -6.12384400 | -0.63954300 |
| H | -4.15316500 | -6.04865500 | 1.08935500  |
| H | -5.65766300 | -5.36185200 | 0.46415200  |
| H | -5.10928300 | -0.01150800 | 0.20346600  |
| H | -5.27335300 | -0.88473600 | 1.73221500  |
| H | -3.89657500 | 0.17420000  | 1.47203400  |
| H | 0.31989000  | -1.59231000 | 0.96813800  |
| N | 1.27390500  | -0.32245000 | 2.39972800  |
| H | 2.26343700  | -0.53317000 | 2.31208700  |
| H | 0.90170200  | -0.94036500 | 3.11689600  |
| C | -1.47214000 | -0.02921500 | 2.52776300  |
| C | -1.66540200 | 0.99100200  | 3.47244000  |
| C | -1.81943100 | -1.33995500 | 2.89763500  |
| C | -2.24127300 | 0.72739700  | 4.71655000  |
| H | -1.32628500 | 1.99805300  | 3.25018600  |
| C | -2.39319300 | -1.60648200 | 4.14152200  |
| H | -1.62956300 | -2.16318500 | 2.21832000  |
| C | -2.61905100 | -0.57265500 | 5.05238400  |
| H | -2.37564400 | 1.53779200  | 5.42779000  |
| H | -2.65422500 | -2.62895900 | 4.40133900  |
| H | -3.06344200 | -0.78250400 | 6.02139300  |

## L7

E= -2740.858829au

|   |             |             |             |
|---|-------------|-------------|-------------|
| P | -1.72962600 | -0.04592600 | -0.38096100 |
| B | 1.59255000  | -0.07152300 | -0.08696400 |
| O | 0.85998400  | 0.02034700  | -1.44023500 |
| O | -0.79734200 | 0.14558000  | -2.92160700 |
| C | -0.75437200 | 0.23100800  | 1.23814900  |
| H | -0.49255600 | 1.28892100  | 1.23952600  |
| C | 0.58978900  | -0.58086400 | 1.11458700  |
| H | 0.31365500  | -1.63262300 | 0.94564500  |
| C | -0.37280200 | 0.04387900  | -1.79172800 |
| C | -2.98165100 | 1.19077300  | -1.01095100 |
| C | -3.12731700 | 2.49524900  | -0.46991200 |
| C | -4.03729600 | 3.37974000  | -1.05912500 |
| H | -4.13579200 | 4.37369700  | -0.63008300 |
| C | -4.80902300 | 3.03951700  | -2.16696100 |
| C | -4.65666900 | 1.75290800  | -2.67922200 |
| H | -5.24977500 | 1.45602500  | -3.54085600 |
| C | -3.76785400 | 0.81453900  | -2.14219000 |
| C | -2.37613700 | 3.02571200  | 0.72796600  |
| H | -1.31261800 | 3.15364800  | 0.51122100  |
| H | -2.48484400 | 2.37511700  | 1.59707400  |
| H | -2.76908300 | 4.00694900  | 1.00749900  |
| C | -5.75177700 | 4.03065100  | -2.80331700 |
| H | -5.24546900 | 4.59393800  | -3.59822000 |
| H | -6.12214400 | 4.75803800  | -2.07365600 |
| H | -6.61339900 | 3.53032400  | -3.25755100 |
| C | -3.77639200 | -0.54147100 | -2.82274100 |
| H | -4.37732700 | -1.26961100 | -2.26729500 |
| H | -2.77673500 | -0.94650200 | -2.96221100 |
| H | -4.22224100 | -0.43903800 | -3.81626300 |
| C | -2.56474400 | -1.69723300 | -0.27330200 |
| C | -3.81768100 | -1.76501800 | 0.39636100  |
| C | -4.45264900 | -3.00732900 | 0.50946500  |
| H | -5.40929300 | -3.05120000 | 1.02479000  |
| C | -3.90418500 | -4.18149700 | -0.00371500 |
| C | -2.67382200 | -4.08894400 | -0.65627400 |
| H | -2.22695900 | -4.98967300 | -1.06991200 |
| C | -1.98658500 | -2.88042300 | -0.81079000 |
| C | -4.55333400 | -0.58066900 | 0.99164600  |
| H | -5.27185700 | -0.93401500 | 1.73686200  |
| H | -5.11036800 | -0.02927500 | 0.22650600  |
| H | -3.89466400 | 0.12884500  | 1.49618100  |

|   |             |             |             |
|---|-------------|-------------|-------------|
| C | -4.59897700 | -5.51132600 | 0.15904000  |
| H | -5.66067500 | -5.38389900 | 0.39188100  |
| H | -4.14878500 | -6.09147900 | 0.97517600  |
| H | -4.51795900 | -6.11756100 | -0.74971100 |
| C | -0.68414000 | -2.93846500 | -1.58002200 |
| H | -0.42990900 | -3.97926200 | -1.79692400 |
| H | 0.15722500  | -2.51195800 | -1.02993400 |
| H | -0.75169000 | -2.41236100 | -2.53792000 |
| C | 2.81497300  | -1.12272400 | -0.45112900 |
| C | 3.71752100  | -0.77023000 | -1.46379400 |
| F | 3.61014300  | 0.42569200  | -2.07373300 |
| C | 4.75575500  | -1.58804700 | -1.90086100 |
| F | 5.58398500  | -1.18616800 | -2.87563700 |
| C | 4.93342100  | -2.83772500 | -1.31439600 |
| F | 5.92339600  | -3.64275200 | -1.71919300 |
| C | 4.06790900  | -3.23864700 | -0.30480400 |
| F | 4.22187400  | -4.44156200 | 0.27140300  |
| C | 3.03995900  | -2.38579500 | 0.09883800  |
| F | 2.25055200  | -2.87240700 | 1.08983000  |
| C | 2.18824800  | 1.42783500  | 0.26121500  |
| C | 3.34625100  | 1.61173600  | 1.02205700  |
| F | 4.02355400  | 0.54161400  | 1.50194400  |
| C | 3.87757000  | 2.85654400  | 1.34807400  |
| F | 4.99486200  | 2.95431200  | 2.08198900  |
| C | 3.23643200  | 4.01105400  | 0.90834900  |
| F | 3.72399000  | 5.21920000  | 1.21539200  |
| C | 2.07105200  | 3.88821300  | 0.16191400  |
| F | 1.41604600  | 4.98618400  | -0.25159200 |
| C | 1.58561500  | 2.61828700  | -0.14019000 |
| F | 0.41679000  | 2.60115700  | -0.84440400 |
| H | -0.29358500 | 5.03461300  | -3.08767100 |
| H | 0.01743900  | 4.75841000  | -2.47266000 |
| N | 1.27019300  | -0.39741200 | 2.40604900  |
| H | 2.25779400  | -0.61547500 | 2.31520800  |
| H | 0.89179000  | -1.02621400 | 3.11045200  |
| C | -1.47443700 | -0.09961300 | 2.54023400  |
| C | -1.67187400 | 0.90189500  | 3.50385200  |
| C | -1.81935000 | -1.41805100 | 2.88427100  |
| C | -2.24953300 | 0.61320800  | 4.74154100  |
| H | -1.33480900 | 1.91382400  | 3.30154100  |
| C | -2.39464500 | -1.70967500 | 4.12179400  |
| H | -1.62683100 | -2.22769000 | 2.18950100  |
| C | -2.62468500 | -0.69394700 | 5.05178600  |

|   |             |             |            |
|---|-------------|-------------|------------|
| H | -2.38731900 | 1.40953200  | 5.46785800 |
| H | -2.65375900 | -2.73752800 | 4.36150300 |
| H | -3.07039600 | -0.92331300 | 6.01574400 |

## TSL78

E= -2740.792738au

|   |             |             |             |
|---|-------------|-------------|-------------|
| P | -2.01204800 | 0.32944700  | 0.43153700  |
| B | 1.66977000  | 0.18909300  | -0.02414800 |
| O | 0.99539200  | -0.13942000 | 1.56405300  |
| O | 1.27132500  | 0.87510800  | 3.63661400  |
| C | -0.83809600 | -0.48966400 | -0.86834200 |
| H | -0.49640700 | -1.40626700 | -0.38896600 |
| C | 0.40765700  | 0.48159800  | -1.03312500 |
| H | 0.03887800  | 1.50517100  | -0.87451100 |
| C | 0.95697300  | 0.58003200  | 2.54500200  |
| C | -2.72057700 | -0.81701200 | 1.72799100  |
| C | -2.66447400 | -2.23397800 | 1.75295100  |
| C | -3.11818900 | -2.91933200 | 2.88912500  |
| H | -3.06713900 | -4.00607000 | 2.88588200  |
| C | -3.63837500 | -2.27138400 | 4.00604200  |
| C | -3.72337700 | -0.87919300 | 3.95477600  |
| H | -4.15094600 | -0.34298000 | 4.79928800  |
| C | -3.27658900 | -0.14018600 | 2.85639700  |
| C | -2.16620200 | -3.09751100 | 0.61722600  |
| H | -1.07727400 | -3.20949500 | 0.64072300  |
| H | -2.44543600 | -2.70350000 | -0.35978300 |
| H | -2.59217700 | -4.10247300 | 0.69972000  |
| C | -4.08497200 | -3.03897900 | 5.22670600  |
| H | -4.29799700 | -4.08556300 | 4.98622300  |
| H | -4.98596100 | -2.60048200 | 5.67005500  |
| H | -3.30736700 | -3.03254500 | 6.00206100  |
| C | -3.45223300 | 1.36340400  | 2.93345700  |
| H | -4.11065200 | 1.74262500  | 2.14505800  |
| H | -2.50155300 | 1.90060900  | 2.84962100  |
| H | -3.89445800 | 1.63896600  | 3.89528300  |
| C | -3.44070300 | 1.19316600  | -0.40091400 |
| C | -3.35499600 | 2.60632600  | -0.53484500 |
| C | -4.42174900 | 3.30506800  | -1.11104200 |
| H | -4.34100100 | 4.38491500  | -1.21467300 |
| C | -5.58341500 | 2.66596900  | -1.54774600 |
| C | -5.65120800 | 1.27954800  | -1.40811300 |
| H | -6.54050400 | 0.75658900  | -1.75332000 |
| C | -4.61033700 | 0.52674200  | -0.85165600 |

|   |             |             |             |
|---|-------------|-------------|-------------|
| C | -2.16421600 | 3.42473800  | -0.07474100 |
| H | -2.31243900 | 4.47830400  | -0.33015600 |
| H | -1.22323100 | 3.10779500  | -0.53572400 |
| H | -2.02381700 | 3.36659900  | 1.01011100  |
| C | -6.73459900 | 3.45069900  | -2.12977200 |
| H | -7.42599200 | 3.77839600  | -1.34185200 |
| H | -7.31246600 | 2.84867200  | -2.83882400 |
| H | -6.38557900 | 4.34947100  | -2.64914600 |
| C | -4.79621700 | -0.97113300 | -0.78854400 |
| H | -5.72620900 | -1.25834300 | -1.28820000 |
| H | -4.84125300 | -1.33858600 | 0.24118400  |
| H | -3.97805800 | -1.49431900 | -1.29211700 |
| C | 2.67827000  | 1.42828100  | 0.30295700  |
| C | 3.70632400  | 1.25997000  | 1.24272700  |
| F | 3.82279500  | 0.08851000  | 1.90152500  |
| C | 4.62988800  | 2.24631400  | 1.57541800  |
| F | 5.57864200  | 2.01727100  | 2.49065600  |
| C | 4.55795300  | 3.48399400  | 0.94293700  |
| F | 5.43219000  | 4.44788600  | 1.24283100  |
| C | 3.56283900  | 3.70611700  | -0.00230200 |
| F | 3.48332600  | 4.89095500  | -0.62197100 |
| C | 2.65512000  | 2.69061400  | -0.29980900 |
| F | 1.74142900  | 2.99797000  | -1.24775000 |
| C | 2.45280300  | -1.19390600 | -0.36311000 |
| C | 3.51900900  | -1.16706400 | -1.26864600 |
| F | 3.90751600  | 0.00332000  | -1.82373700 |
| C | 4.23413400  | -2.29373700 | -1.66147800 |
| F | 5.24559000  | -2.19234500 | -2.53400800 |
| C | 3.88960700  | -3.53676700 | -1.13940900 |
| F | 4.56131900  | -4.63465200 | -1.50311800 |
| C | 2.83247000  | -3.62216300 | -0.24154400 |
| F | 2.47875000  | -4.81155500 | 0.26696700  |
| C | 2.14441200  | -2.46537300 | 0.12190400  |
| F | 1.11833300  | -2.64882700 | 0.98866700  |
| H | -0.24508700 | 1.66111800  | 2.12809900  |
| H | -0.85166900 | 1.41622600  | 1.58353700  |
| N | 0.97461100  | 0.31430000  | -2.38828400 |
| C | -1.46841000 | -0.86843600 | -2.20092200 |
| C | -1.35193700 | -2.18563700 | -2.67326900 |
| C | -2.09275200 | 0.07284900  | -3.03760800 |
| C | -1.87183700 | -2.56116600 | -3.91287800 |
| H | -0.82691600 | -2.92234100 | -2.07207300 |
| C | -2.60877500 | -0.29820700 | -4.28053500 |

|   |             |             |             |
|---|-------------|-------------|-------------|
| H | -2.17997000 | 1.10638100  | -2.71984500 |
| C | -2.50912200 | -1.61897800 | -4.72100500 |
| H | -1.76569900 | -3.58883500 | -4.25021200 |
| H | -3.08860100 | 0.45077900  | -4.90508100 |
| H | -2.91255000 | -1.90715000 | -5.68787700 |
| H | 1.79884200  | 0.90188100  | -2.48633200 |
| H | 0.31291900  | 0.63113200  | -3.09392800 |

## L8

E= -2740.888473au

|   |             |             |             |
|---|-------------|-------------|-------------|
| P | -1.94522200 | -0.19117600 | -0.36015700 |
| B | 1.64013200  | -0.22404900 | -0.16766200 |
| O | 0.86441300  | -0.13415700 | -1.47556000 |
| O | 0.66867200  | 0.29984100  | -3.65392400 |
| C | -0.79362900 | 0.09610900  | 1.12404300  |
| H | -0.51998300 | 1.14813800  | 1.03229100  |
| C | 0.54596600  | -0.79114300 | 0.95755900  |
| H | 0.21236600  | -1.78245300 | 0.64857900  |
| C | 1.32054000  | 0.32780300  | -2.62801500 |
| C | -2.61635600 | 1.26636700  | -1.27864800 |
| C | -2.84037800 | 2.54708400  | -0.71757800 |
| C | -3.36562300 | 3.55526400  | -1.53355400 |
| H | -3.53935000 | 4.53447200  | -1.09357300 |
| C | -3.66044800 | 3.35437400  | -2.88105500 |
| C | -3.42235800 | 2.08722800  | -3.41518500 |
| H | -3.64065300 | 1.90378400  | -4.46435500 |
| C | -2.90180200 | 1.03700800  | -2.65514700 |
| C | -2.51266700 | 2.93915700  | 0.70404800  |
| H | -1.46712100 | 3.26258500  | 0.77106500  |
| H | -2.66962800 | 2.13818000  | 1.42604300  |
| H | -3.13294700 | 3.78553500  | 1.01423600  |
| C | -4.19159400 | 4.47456900  | -3.74121800 |
| H | -3.37563200 | 4.96162800  | -4.29098500 |
| H | -4.68610100 | 5.24360100  | -3.13927800 |
| H | -4.90736100 | 4.10577000  | -4.48362800 |
| C | -2.63556300 | -0.26967700 | -3.36833400 |
| H | -3.06265900 | -1.13271800 | -2.84786300 |
| H | -1.55365600 | -0.41491400 | -3.49482100 |
| H | -3.07799500 | -0.24414600 | -4.36797700 |
| C | -3.23015100 | -1.48772700 | -0.11026400 |
| C | -4.47792100 | -1.18856800 | 0.49419100  |
| C | -5.42435200 | -2.20735900 | 0.62848900  |
| H | -6.37782000 | -1.97117200 | 1.09505700  |

|   |             |             |             |
|---|-------------|-------------|-------------|
| C | -5.18383100 | -3.51181600 | 0.19277800  |
| C | -3.94558200 | -3.78657700 | -0.38984800 |
| H | -3.73538700 | -4.79791200 | -0.72899000 |
| C | -2.95594800 | -2.81094300 | -0.55902500 |
| C | -4.83628200 | 0.18057500  | 1.02297800  |
| H | -5.83337900 | 0.16449900  | 1.47173200  |
| H | -4.83885300 | 0.93903100  | 0.23408300  |
| H | -4.13656400 | 0.50477700  | 1.80059300  |
| C | -6.23698500 | -4.58450500 | 0.32699200  |
| H | -6.87167900 | -4.41531500 | 1.20294900  |
| H | -5.78788200 | -5.57893300 | 0.41518400  |
| H | -6.89345100 | -4.59945300 | -0.55313100 |
| C | -1.66199500 | -3.25384100 | -1.21673300 |
| H | -1.71906400 | -4.31891600 | -1.45677700 |
| H | -0.78024100 | -3.11860200 | -0.58310100 |
| H | -1.46680700 | -2.72475800 | -2.15624200 |
| C | 2.88626200  | -1.28546400 | -0.43799800 |
| C | 4.10119400  | -0.86679000 | -0.99225900 |
| F | 4.30454700  | 0.44279000  | -1.28312300 |
| C | 5.16547600  | -1.70971000 | -1.30121300 |
| F | 6.30027000  | -1.21962500 | -1.82301300 |
| C | 5.03941500  | -3.07442500 | -1.07058900 |
| F | 6.04414100  | -3.91163700 | -1.35967900 |
| C | 3.84598400  | -3.55638800 | -0.54789900 |
| F | 3.69424800  | -4.87425500 | -0.33824700 |
| C | 2.80908600  | -2.67044300 | -0.25698600 |
| F | 1.68404400  | -3.26732400 | 0.20898800  |
| C | 2.15103300  | 1.27700600  | 0.34038600  |
| C | 3.23677700  | 1.47477500  | 1.20375400  |
| F | 3.97661200  | 0.42791600  | 1.62245300  |
| C | 3.62909500  | 2.71874000  | 1.69596100  |
| F | 4.68367000  | 2.82766800  | 2.51665700  |
| C | 2.91079300  | 3.85709000  | 1.34339200  |
| F | 3.25764700  | 5.05825300  | 1.82226000  |
| C | 1.81600900  | 3.72056200  | 0.49958100  |
| F | 1.07554200  | 4.79381800  | 0.17232700  |
| C | 1.47509800  | 2.45704900  | 0.02055500  |
| F | 0.37453300  | 2.43104500  | -0.77985000 |
| H | -1.07855900 | -0.76347400 | -1.29467000 |
| H | 2.34075200  | 0.74277700  | -2.58974000 |
| N | 1.24762800  | -0.97654400 | 2.21678000  |
| C | -1.46243000 | -0.11255100 | 2.47278100  |
| C | -1.47782800 | 0.93203700  | 3.41133800  |

|   |             |             |            |
|---|-------------|-------------|------------|
| C | -1.96708800 | -1.36261900 | 2.87156400 |
| C | -2.01066900 | 0.75002600  | 4.68929200 |
| H | -1.05285600 | 1.89580000  | 3.14366000 |
| C | -2.50014900 | -1.54685500 | 4.14791800 |
| H | -1.93459800 | -2.20348000 | 2.18661400 |
| C | -2.53127200 | -0.48986000 | 5.06030500 |
| H | -2.00918500 | 1.57647700  | 5.39476000 |
| H | -2.88450900 | -2.52297200 | 4.43105000 |
| H | -2.94449600 | -0.63622900 | 6.05430900 |
| H | 1.64743300  | -0.10959600 | 2.56428300 |
| H | 0.66120700  | -1.36500400 | 2.95063000 |

## TSL8

E= -2740.857704au

|   |             |             |             |
|---|-------------|-------------|-------------|
| P | -1.80894400 | -0.11203800 | -0.46064900 |
| B | 1.76726300  | -0.13933000 | 0.12914700  |
| O | 0.91656500  | -0.01736400 | -1.71315100 |
| O | 0.40635700  | 0.72777900  | -3.78577600 |
| C | -0.84045100 | 0.11051300  | 1.20193600  |
| H | -0.62832500 | 1.17944100  | 1.24556300  |
| C | 0.52976800  | -0.65536300 | 1.04083700  |
| H | 0.28943300  | -1.68758900 | 0.79061700  |
| C | 1.20840200  | 0.56027900  | -2.90400100 |
| C | -2.87717100 | 1.32436900  | -1.01862700 |
| C | -3.16197500 | 2.52669000  | -0.32739900 |
| C | -3.93989900 | 3.51291300  | -0.94926000 |
| H | -4.15284700 | 4.42479800  | -0.39521700 |
| C | -4.44988900 | 3.36903800  | -2.23701500 |
| C | -4.14376800 | 2.18966700  | -2.91667300 |
| H | -4.51424400 | 2.04994700  | -3.93008400 |
| C | -3.35872000 | 1.17926800  | -2.35359800 |
| C | -2.66510800 | 2.84763200  | 1.06128800  |
| H | -1.60292700 | 3.12044000  | 1.04512600  |
| H | -2.79194300 | 2.01445300  | 1.75319000  |
| H | -3.20988000 | 3.70332300  | 1.47168100  |
| C | -5.27277500 | 4.45605900  | -2.88601400 |
| H | -4.66630700 | 5.04821600  | -3.58414900 |
| H | -5.68318400 | 5.14629400  | -2.14178200 |
| H | -6.10800900 | 4.03849100  | -3.45964000 |
| C | -3.04085900 | -0.01160600 | -3.23470400 |
| H | -3.36476500 | -0.96237400 | -2.80031200 |
| H | -1.96395200 | -0.07351000 | -3.43186200 |
| H | -3.54231800 | 0.09559000  | -4.20133500 |



|   |             |             |             |
|---|-------------|-------------|-------------|
| C | -2.94005200 | -1.58427500 | -0.27830000 |
| C | -4.20587500 | -1.53177100 | 0.36124800  |
| C | -4.99062900 | -2.68969300 | 0.41793500  |
| H | -5.95592000 | -2.63753700 | 0.91735800  |
| C | -4.57811700 | -3.90273100 | -0.13397800 |
| C | -3.33041400 | -3.93956300 | -0.75883100 |
| H | -2.98482400 | -4.87382600 | -1.19614400 |
| C | -2.50669600 | -2.81167100 | -0.85154600 |
| C | -4.76828700 | -0.28343900 | 1.00066000  |
| H | -5.63677600 | -0.53403700 | 1.61742100  |
| H | -5.08776600 | 0.44816000  | 0.25147700  |
| H | -4.03628500 | 0.20713700  | 1.64696200  |
| C | -5.46109800 | -5.12666700 | -0.08243100 |
| H | -6.09073800 | -5.19617000 | -0.97962500 |
| H | -6.13126100 | -5.10177700 | 0.78329500  |
| H | -4.86937900 | -6.04685700 | -0.03026000 |
| C | -1.18437900 | -2.98250300 | -1.57575900 |
| H | -1.12949000 | -3.98098500 | -2.02049200 |
| H | -0.32082800 | -2.88234000 | -0.90927800 |
| H | -1.05806200 | -2.25326900 | -2.38235500 |
| C | 2.89300200  | -1.20237100 | -0.31290500 |
| C | 3.97303400  | -0.81268900 | -1.11673900 |
| F | 4.06996000  | 0.46827200  | -1.54757400 |
| C | 4.98587000  | -1.66412400 | -1.54397200 |
| F | 5.98217700  | -1.21061900 | -2.31525700 |
| C | 4.95335100  | -3.00123000 | -1.16130300 |
| F | 5.91279900  | -3.84241300 | -1.55603600 |
| C | 3.90188300  | -3.45034200 | -0.37137300 |
| F | 3.84744300  | -4.73735500 | -0.00372200 |
| C | 2.90368600  | -2.56166200 | 0.02696100  |
| F | 1.92323700  | -3.11393900 | 0.77156200  |
| C | 2.23690300  | 1.37839500  | 0.41418300  |
| C | 3.42022700  | 1.64939400  | 1.11539800  |
| F | 4.23148300  | 0.64734100  | 1.49353000  |
| C | 3.82889000  | 2.93418700  | 1.46661500  |
| F | 4.96906100  | 3.12593800  | 2.14121400  |
| C | 3.04171900  | 4.02662400  | 1.11409900  |
| F | 3.41542100  | 5.26497300  | 1.44757700  |
| C | 1.85734900  | 3.81241100  | 0.41753000  |
| F | 1.07580600  | 4.84784200  | 0.08306700  |
| C | 1.48623300  | 2.51107400  | 0.08738700  |
| F | 0.31476800  | 2.39217100  | -0.58336500 |
| H | -0.10489300 | -0.13356100 | -1.56106100 |

|   |             |             |             |
|---|-------------|-------------|-------------|
| H | 2.27028000  | 0.83075900  | -2.95013300 |
| C | -1.49861300 | -0.29905200 | 2.51123300  |
| C | -1.61847700 | 0.62868400  | 3.55989800  |
| C | -1.88190900 | -1.62700400 | 2.77013200  |
| C | -2.13999100 | 0.26154500  | 4.80255200  |
| H | -1.28841700 | 1.65299600  | 3.40686900  |
| C | -2.40117100 | -1.99764000 | 4.01112700  |
| H | -1.77620600 | -2.38100200 | 1.99791500  |
| C | -2.54018400 | -1.05464400 | 5.03190200  |
| H | -2.22240400 | 1.00451200  | 5.59154600  |
| H | -2.69482200 | -3.03034200 | 4.17981500  |
| H | -2.94474400 | -1.34602800 | 5.99728000  |
| N | 1.31858400  | -0.71759900 | 2.29302800  |
| H | 0.95604100  | -1.41630000 | 2.93704600  |
| H | 1.30789000  | 0.17795300  | 2.77484300  |

## CO<sub>2</sub>

E= -188.5775705au

|   |          |          |           |
|---|----------|----------|-----------|
| O | 0.000000 | 0.000000 | 1.169592  |
| C | 0.000000 | 0.000000 | 0.000000  |
| O | 0.000000 | 0.000000 | -1.169592 |

## HCOOH

E= -189.743482au

|   |           |           |           |
|---|-----------|-----------|-----------|
| C | 0.131235  | 0.361721  | -0.000054 |
| O | 1.179170  | -0.219022 | 0.000019  |
| O | -1.059436 | -0.281621 | 0.000002  |
| H | -1.781119 | 0.369489  | 0.000067  |
| H | 0.035839  | 1.465330  | 0.000088  |
